# Supplementary material for: A novel adaptive ensemble classification framework for ADME prediction
Source: PubMed Central journal article supplement — RSC Adv. 2018 Mar 26;8(21):11661–83. doi: 10.1039/c8ra01206g (PMC9079056; doi:10.1039/c8ra01206g), 2018-03-26
Supplement: RA-008-C8RA01206G-s001.pdf [file RA-008-C8RA01206G-s001.pdf]

## Electronic Supplementary Information

### **A novel adaptive ensemble classification framework for ADME prediction**

Ming Yang, Jialei Chen, Liwen Xu, Xiufeng Shi, Xin Zhou, Zhijun Xi, Rui An\*, and Xinhong Wang\*

#### Contents

**Table S1.** All molecules and their structures & Reference of collected molecules.

**Table S2.** Descriptors calculated in the present work.

**Table S3.** Analysis of variance table of the regression model.

**Table S4.** The adjusted *P*-values of pairwise contrasts for different ensemble based methods.

**Figure S1.** Distributions of top-9 molecular properties for CacoP data.

**Figure S2.** Distributions of top-9 molecular properties for HIA data.

**Figure S3.** Distributions of top-9 molecular properties for OB data.

**Figure S4.** Distributions of top-9 molecular properties for PS data.

**Figure S5.** Distributions of top-9 molecular properties for PI data.





|      |       |        |    |                                                                                                                                                                                                  |
|------|-------|--------|----|--------------------------------------------------------------------------------------------------------------------------------------------------------------------------------------------------|
| C91  | CacoP | CacoP- | 13 | O=C1C(CCS(=O)c2ccccc2)C(=O)N(N1c1ccccc1)c1ccccc1                                                                                                                                                 |
| C92  | CacoP | CacoP- | 13 | O=C(NC[C@H]1[NH+](CC)CCC1)c1cc(ccc1OC)S(=O)(=O)N                                                                                                                                                 |
| C93  | CacoP | CacoP- | 13 | cc1c@H]1[C@@H]2[C@@H]1[C@@H](C(=O)[C@@H]1[C@@H](C[C@@H](C(=O)O1)C)O[C@H]1[C@@H]1[C@@H](C[C@@H](O1)C)[NH+](C)C)O(C)OC)C)N(C(=O)O2)CCCC1cc(ne1)c1encec1C                                           |
| C94  | CacoP | CacoP- | 13 | CC(C)(C)C#C/C=C/C[NH+](C)Cc1c2ccccc2ccc1                                                                                                                                                         |
| C95  | CacoP | CacoP- | 13 | CCC1(c2c(COC1=O)c(=O)n1Cc3c(nc4ccc(c4c3)C[NH+](C)C)O)c1c2)O                                                                                                                                      |
| C96  | CacoP | CacoP- | 13 | O=C(C1CCC(C[NH3+])CC1)[O-]                                                                                                                                                                       |
| C97  | CacoP | CacoP- | 13 | FC(c1cc2c(cc1)Sc1c(cccc1)N2CCC[NH+])1CCN(C)CC1)(F)F                                                                                                                                              |
| C98  | CacoP | CacoP- | 13 | CC([C@H](N(Cc1ccc(cc1)c1c(cccc1)c1nmm[nH]1)C(=O)CCCC)C(=O)[O-])[O-]C                                                                                                                             |
| C99  | CacoP | CacoP- | 13 | O=C(NCC[NH2+][C@@H](O)COc1ccc(cc1)O)N1CCOCC1                                                                                                                                                     |
| C100 | CacoP | CacoP- | 13 | OC[C@H]([C@H]([C@@H]([C@H](CO)O)O)O)O                                                                                                                                                            |
| C101 | CacoP | CacoP- | 13 | O=c1nc(N)ccn1[C@@H]1O[C@H](CO)[C@@H](O)C1(F)F                                                                                                                                                    |
| C102 | CacoP | CacoP- | 13 | CC(C)C[C@H]1C(=O)N2CCC[C@H]2[C@@H]2(N1C(=O)[C@](O2)(C(C)C)NC(=O)[C@H]1C[NH+])([C@@H]2Cc3c([nH]c4cccc(c34)C2=C1)Br)C)O                                                                            |
| C103 | CacoP | CacoP- | 13 | O=C([C@H]1CSSC[C@H]([NH3+])C(=O)N[C@H](Cc2ccc(cc2)O)C(=O)N[C@H](Cc2ccccc2)C(=O)N[C@H](CCCC(=O)N)C(=O)N[C@H](CC(=O)N)C(=O)N1[C@H](C(=O)N[C@H](C(=O)N)CCN=C(N)N)CCC1                               |
| C104 | CacoP | CacoP- | 13 | O=C1N[C@@H](C(=O)N[C@H](C(=O)N[C@H](Cc2[nH]3c2ccc3)C(=O)N[C@H](CO)C(=O)N[C@H](C(=O)N[C@H](COC(C)C)C(=O)N[C@H](CC(C)C)C(=O)N[C@H](CCCN=C(N)N)C(=O)N2CCC[C@@H]2C(=O)N)C)C2ccc(cc2)O)Cc2en[nH]2)CC1 |
| C105 | CacoP | CacoP- | 13 | O=c1n(NC(=O)N[NH3+])c(=O)c2cc(cc3c2c1cc(c3N)S(=O)(=O)[O-])S(=O)(=O)[O-]                                                                                                                          |
| C106 | CacoP | CacoP- | 13 | O=C(NC)[C@H](NC(=O)[C@@H](C)NC(=O)C)Cc1ccccc1                                                                                                                                                    |
| C107 | CacoP | CacoP- | 13 | O=C(NC)[C@H](NC(=O)[C@@H](C(C)C)NC(=O)C)Cc1ccccc1                                                                                                                                                |
| C108 | CacoP | CacoP- | 13 | O=S(=O)(c1ccc2ccccc2c1)N[C@@H](Cc1cc(ccc1)C(=N)N)CC(=O)N1CCCC[C@@H]1C(=O)OC                                                                                                                      |
| C109 | CacoP | CacoP- | 13 | O=S(=O)(c1ccc2ccccc2c1)NC(Cc1cc(ccc1)C(=N)N)CC(=O)N1CCCC(C(=O)[O-])C1                                                                                                                            |
| C110 | CacoP | CacoP- | 13 | O=S(=O)(c1ccc2ccccc2c1)NC(Cc1cc(ccc1)C(=N)N)CC(=O)N1CCC(C(=O)[O-])CC1                                                                                                                            |
| C111 | CacoP | CacoP- | 13 | O=S(=O)(c1ccc2ccccc2c1)NC(Cc1cc(ccc1)C(=N)N)CC(=O)N1CCC(C(=O)OC)CC1                                                                                                                              |
| C112 | CacoP | CacoP- | 13 | O=S(=O)(c1ccc2ccccc2c1)NC(Cc1cc(ccc1)C(=N)NO)CC(=O)N1CCC(C(=O)[O-])CC1                                                                                                                           |
| C113 | CacoP | CacoP- | 13 | O=S(=O)(c1ccc2ccccc2c1)NC(Cc1cc(ccc1)C(=N)N)CC(=O)N1CC[NH2+])CC1                                                                                                                                 |
| C114 | CacoP | CacoP- | 13 | O=C([C@H]1CSSCC(=O)N[C@H](Cc2ccc(cc2)O)C(=O)N[C@H](Cc2ccccc2)C(=O)N[C@H](CCCC(=O)N)C(=O)N[C@H](CC(=O)N)C(=O)N1N1[C@H](C(=O)N[C@H](C(=O)N)CCN=C(N)N)CCC1                                          |
| C115 | CacoP | CacoP- | 13 | O=S(=O)(c1ccc2ccccc2c1)NC(Cc1cc(ccc1)C(=N)NC)CC(=O)N1CCC(C)CC1                                                                                                                                   |
| C116 | CacoP | CacoP- | 13 | OC([NH2+])CCNC(=O)N1CCC(O)CC1)COc1ccc(cc1)CCOCCOCC1CC1                                                                                                                                           |
| C117 | CacoP | CacoP- | 13 | O=S(=O)(Nc1ncccc1)c1ccc(cc1)N/N=C/1\C=C(C(=O)[O-])C(=O)C=C1                                                                                                                                      |
| C118 | CacoP | CacoP- | 13 | O=C([O-])C[NH2+][C@H](C1CCCC1)C(=O)N1[C@H](C(=O)N(c2ccc(cc2)C(=N)N)C)CC1                                                                                                                         |
| C119 | CacoP | CacoP- | 13 | CC1C(O)C(O)C(O)C(O)[C@H]2CC[C@]3(C)[C@H]4CC[C@]5(C)[C@@H](c6coc(=O)cc6)CC[C@]5(O)[C@@H]4CCC3=C2)O1                                                                                               |
| C120 | CacoP | CacoP- | 13 | Oc1ccc(cc1)C([NH3+])C(=O)N[C@@H]1[C@@H]2SCC(=C(C(=O)[O-])N2C1=O)CSc1n[nH]cn1                                                                                                                     |
| C121 | CacoP | CacoP- | 13 | O=C(C(OP(=O)(CCCCc1ccccc1)[O-])CCCC[NH3+])N1C(C(=O)[O-])CCCC1                                                                                                                                    |
| C122 | CacoP | CacoP- | 13 | CC[N+](Cc1c(cccc1)Br)(C)C                                                                                                                                                                        |
| C123 | CacoP | CacoP- | 13 | O=C(C1=CCS[C@H]2N1C(=O)[C@H]2NC(=O)/C(=C)CC(=O)O)/c1csc(n1)N)[O-]                                                                                                                                |
| C124 | CacoP | CacoP- | 13 | NC(=N)c1ccc(cc1)OCCCCCOc1ccc(cc1)C(=N)N                                                                                                                                                          |
| C125 | CacoP | CacoP- | 13 | C[C@H]1C[C@H]2[C@H]3CCC4=CC(=O)C=C[C@]4(C)[C@@]3(F)[C@@H](O)C[C@]2(C)[C@]1(C(=O)COC1[C@H](O)[C@H](O)[C@H](O)[C@H](CC(=O)[O-])O1)O                                                                |
| C126 | CacoP | CacoP- | 13 | O[C@H]1[C@@H](CO)(O)O[C@@H](CO)[C@@H]1O[C@@H]1O[C@@H]1([C@@H]([C@@H]([C@H]1O)O)CO                                                                                                                |
| C127 | CacoP | CacoP- | 13 | CO/N=C(c1ccco1)/C(=O)NC1C2N(C1=O)C(=C(CS2)COC(=O)N)C(=O)[O-]                                                                                                                                     |
| C128 | CacoP | CacoP- | 13 | OC(C)C(=O)[O-]                                                                                                                                                                                   |
| C129 | CacoP | CacoP- | 13 | CN1CC(=O)N=C1N                                                                                                                                                                                   |
| C130 | CacoP | CacoP- | 13 | C[C@H]1C(=O)N(C)[C@H](C(=O)NC)Cc2cn(cn2)CC(=O)N2[C@H](C(=O)N1)CCC2                                                                                                                               |
| C131 | CacoP | CacoP- | 13 | O=C1N[C@H](C(=O)N2[C@@H](CCC2)C(=O)N[C@H](C(=O)N[C@H](Cc2c[nH]c3c2ccccc3)C(=O)N[C@H](C(=O)N[C@H]1[C@@H](CO)CCCC[NH3+])Cc1ccccc1)Cc1ccccc1                                                        |
| C132 | CacoP | CacoP- | 13 | O=C1N[C@H](C(=O)N2[C@@H](CCC2)C(=O)N[C@H](C(=O)N(C)[C@H](Cc2c[nH]c3c2ccccc3)C(=O)N[C@H](C(=O)N[C@H]1[C@@H](CO)CCCC[NH3+])Cc1ccccc1)Cc1ccccc1                                                     |
| C133 | CacoP | CacoP- | 13 | CC(=O)N[C@@H](Cc1ccccc1)C(=O)N[C@H](Cc1ccccc1)C(=O)N[C@@H](Cc1ccccc1)C(=O)N                                                                                                                      |
| C134 | CacoP | CacoP- | 13 | NC(=N)c1ccc2c(c1)[nH]c(n2)Cc1nc2c([nH]1)c(ccn2)C                                                                                                                                                 |
| C135 | CacoP | CacoP- | 13 | Fe1cc(ccc1C1CCS(=O)CC1)N1C[C@H](CNC(=O)C)OC1=O                                                                                                                                                   |
| C136 | CacoP | CacoP- | 13 | Fe1cc(ccc1N1CCN(C(=O)CO)CC1)N1C[C@H](CNC(=O)C)OC1=O                                                                                                                                              |







|      |       |        |              |                                                                                                                                                                             |
|------|-------|--------|--------------|-----------------------------------------------------------------------------------------------------------------------------------------------------------------------------|
| C275 | CacoP | CacoP+ | 12           | [C@@H]12CC[C@](O)(C(=O)CO)[C@@]1(C)C[C@H](O)[C@H]1[C@H]2CCCC2=CC(=O)C=C[C@]12C                                                                                              |
| C276 | CacoP | CacoP+ | 2            | C[C@]12CC[C@H]3[C@@H](CCC4=Ce5c(en5)C[C@]34C)[C@@H]1CC[C@@]2(O)C#C                                                                                                          |
| C277 | CacoP | CacoP+ | 11           | CCC12CC[NH+](CC(C)(C)O)C(Ce3ccc(cc13)O)C2(C)C                                                                                                                               |
| C278 | CacoP | CacoP+ | 10,11,12,6,2 | CC(=O)CC(c1cccc1)c1c(O)oc2cccc2c1=O                                                                                                                                         |
| C279 | CacoP | CacoP+ | 12           | OCC(C(=O)OC1C[C@H]2[NH+](C)[C@H](CC2)C1)c1cccc1                                                                                                                             |
| C280 | CacoP | CacoP+ | 12           | c1c2c(cc(c1OC)OC)[C@@]13CC[NH+]+4CC5=CCOC6CC(=O)N2C1[C@H]6[C@H]5C[C@@H]34                                                                                                   |
| C281 | CacoP | CacoP+ | 13           | c1(c(nc(c(n1)Cl)N)N)C(=O)N=C(N)N                                                                                                                                            |
| C282 | CacoP | CacoP+ | 13           | Nc1nc2c(cc(cc2)/C(=C/C(=O)N)/c2cccc(c2)F)n1S(=O)(=O)C(C)C                                                                                                                   |
| C283 | CacoP | CacoP+ | 13           | Nc1nc2c(cc(cc2)/C(=C/C(=O)N)/c2ccc(ccc2F)F)n1S(=O)(=O)C(C)C                                                                                                                 |
| C284 | CacoP | CacoP+ | 13           | Nc1nc2c(cc(cc2)/C(=C/C(=O)N)C)/c2ccc(ccc2F)F)n1S(=O)(=O)C(C)C                                                                                                               |
| C285 | CacoP | CacoP+ | 13           | Nc1nc2c(cc(cc2)/C(=C/C(=O)N)C)/c2cccc2n1S(=O)(=O)C(C)C                                                                                                                      |
| C286 | CacoP | CacoP+ | 13           | Nc1nc2c(cc(cc2)/C(=C/C(=O)N)C)/c2cccc(c2)F)n1S(=O)(=O)CCC                                                                                                                   |
| C287 | CacoP | CacoP+ | 13           | Nc1nc2ccc(cc2n1S(=O)(=O)C(C)C)/C(=C/C(=O)N)/c1ccc(c(c1)F)OC                                                                                                                 |
| C288 | CacoP | CacoP+ | 13           | Nc1n(c2c(n1)ccc(c2)/C(=C/C(=O)N)/c1c(c(c(c1F)F)F)F)S(=O)(=O)C(C)C                                                                                                           |
| C289 | CacoP | CacoP+ | 13           | Nc1nc2ccc(cc2n1S(=O)(=O)C(C)C)/C(=C/C(=O)N)/c1ccc(c(c1)F)F                                                                                                                  |
| C290 | CacoP | CacoP+ | 13           | Nc1nc2ccc(cc2n1S(=O)(=O)C(C)C)/C(=C/C(=O)N)/c1ccc(cc1F)F                                                                                                                    |
| C291 | CacoP | CacoP+ | 13           | Nc1n(c2c(n1)ccc(c2)/C(=C/C(=O)N)C)/c1ccc(c1)F)S(=O)(=O)[N-]C(=O)N(C)C                                                                                                       |
| C292 | CacoP | CacoP+ | 13           | O=C(NCC1[NH2+]CCCC1)c1ccc(ccc1OCC(F)F)OCC(F)F                                                                                                                               |
| C293 | CacoP | CacoP+ | 13           | Nc1n(c2c(n1)ccc(c2)/C(=C/C(=O)N)/c1ccc(c1)F)S(=O)(=O)[N-]C(=O)N1CCOCC1                                                                                                      |
| C294 | CacoP | CacoP+ | 13           | Nc1nc2c(cc(cc2)/C(=C/C(=O)N)C)/c2cccc(c2F)F)n1C(C)C                                                                                                                         |
| C295 | CacoP | CacoP+ | 13           | Nc1nc2ccc(cc2n1C1CCCC1)/C(=C/C(=O)N)C)/c1cccc1F                                                                                                                             |
| C296 | CacoP | CacoP+ | 13           | CC(c1c(c(ccc1)C(C)C)O)C                                                                                                                                                     |
| C297 | CacoP | CacoP+ | 13           | c1ccc(ccc1N)S(=O)(=O)N                                                                                                                                                      |
| C298 | CacoP | CacoP+ | 13           | Oc1ccc(cc(c1O)O)C(=O)OC                                                                                                                                                     |
| C299 | CacoP | CacoP+ | 13           | O=C1C([NH2+]C)(c2cccc2Cl)CCCC1                                                                                                                                              |
| C300 | CacoP | CacoP+ | 13           | O=C(CCCCCCCC)Nc1ccc(cc1)S(=O)(=O)Nc1nncs1                                                                                                                                   |
| C301 | CacoP | CacoP+ | 13           | CC1(C)[C@H]2[C@@H]1CN(C(=O)[C@@H](C(C)(C)C)NC(=O)N[C@H](C(=O)C(C)C)C(C)C)[C@@H]2C(=O)N[C@@H](CCC)C(=O)C(=O)NCC=C                                                            |
| C302 | CacoP | CacoP+ | 13           | ClC1(Cl)C2C1CN(C(=O)C(NC(=O)OC(C)(C)C)C(C)C)C2C(=O)NC(Cc1CCCC1)C(=O)C(=O)N                                                                                                  |
| C303 | CacoP | CacoP+ | 13           | O=C1N2C(C[C@@H](O)c3ccc(nc4ccc(cc34)OC)c3esc(n3)NC(C)C)C2)C(=O)N[C@@]2([C@@H](/C=C/CCCC[C@@H]1NC(=O)OC1CCCC1)C2)C(=O)[O-]                                                   |
| C304 | CacoP | CacoP+ | 13           | C[NH2+]CCC(Oc1ccc(cc1)C)c1cccc1                                                                                                                                             |
| C305 | CacoP | CacoP+ | 13           | O=C(c1cc(nn1c1cccc(c1)C[NH3+])C(F)F)Nc1c(cc(c1)c1cccc1S(=O)(=O)C)F                                                                                                          |
| C306 | CacoP | CacoP+ | 13           | COc1ccc(cc(c1OC)OC)C(=O)N1CC[C@@](c2ccc(c2)Cl)Cl)(CC[NH+]2CCC(C(=O)N3CCN(C)CC3)(c3cccc3)CC2)C1                                                                              |
| C307 | CacoP | CacoP+ | 13           | Oc1c2cccc2ccc1                                                                                                                                                              |
| C308 | CacoP | CacoP+ | 13           | Fe1cccc2c1O[C@@H]1[C@H](O2)C[NH2+]C1                                                                                                                                        |
| C309 | CacoP | CacoP+ | 13           | [NH3+][C@@H]([C@@H](O)[C@@H](O)CC(C)C)CC1CCCCC1                                                                                                                             |
| C310 | CacoP | CacoP+ | 13           | O[C@@H]([C@@H](O)CC(C)C)[C@@H](NC(=O)CCCCc1cccc1)CC1CCCCC1                                                                                                                  |
| C311 | CacoP | CacoP+ | 13           | O[C@@H]([C@@H](O)CC(C)C)[C@@H](NC(=O)C[C@H](NC(=O)OC(C)(C)C)C(=O)[O-])CC1CCCCC1                                                                                             |
| C312 | CacoP | CacoP+ | 13           | O[C@@H]([C@@H](O)CC(C)C)[C@@H](NC(=O)[C@@H](NC(=O)[C@H](Cc1cccc1)NS(=O)(=O)N1CCN(C(=O)CCC(=O)[O-])CC1)Cc1csc(n1)N)CC1CCCCC1                                                 |
| C313 | CacoP | CacoP+ | 13           | O=C(N1CCC(C(C(=O)[O-])C2CNe3c(ccc3)C2)CC1)CCc1nc2c(cc1)CCCN2                                                                                                                |
| C314 | CacoP | CacoP+ | 13           | O=c1[nH]c(=O)n(cc1F)[C@H]1O[C@@H](COC(=O)C(C)C)[NH3+][C@H](O)C1                                                                                                             |
| C315 | CacoP | CacoP+ | 13           | O=c1[nH]c(=O)n(cc1F)[C@H]1O[C@@H](CO)[C@H](OC(=O)[C@H]([C@@H](C)CC)[NH3+])C1                                                                                                |
| C316 | CacoP | CacoP+ | 13           | Oc1ccc(cc1)C(=O)OCCCC                                                                                                                                                       |
| C317 | CacoP | CacoP+ | 13           | Oc1ccc(cc1)C(=O)OCCCCC                                                                                                                                                      |
| C318 | CacoP | CacoP+ | 13           | O=C(CC(=O)/C=C/c1ccc(c(c1)OC)O)/C=C/c1ccc(c(c1)OC)O                                                                                                                         |
| C319 | CacoP | CacoP+ | 13           | cc1=c2[C@@H](O)C(=O)[C@@]3(C)[C@@H](O)[C@@H]C@@H(O)[C@@H](O)[C@@H](O)CO4C[C@H]4[C@@](CO4)(OC(=O)C[C@H]3[C@@H](O)C[C@@H]1OC(=O)[C@@H](O)[C@H](NC(=O)c1cccc1)c1cccc1)O)C2(C)C |
| C320 | CacoP | CacoP+ | 13           | Fe1c(c(c(cc1)OC)c1nc2c(ncc(c2)Cl)s1)F)C(=O)N                                                                                                                                |



|      |       |        |    |                                                                                                                                    |
|------|-------|--------|----|------------------------------------------------------------------------------------------------------------------------------------|
| C321 | CacoP | CacoP+ | 13 | N#Cc1cccc(c1)Cn1ence1                                                                                                              |
| C322 | CacoP | CacoP+ | 13 | c1(ccccc1)Cn1ene2c1cccc2                                                                                                           |
| C323 | CacoP | CacoP+ | 13 | O=C([O-])c1cccc(cc1)Cn1ene2c1cccc2                                                                                                 |
| C324 | CacoP | CacoP+ | 13 | NS(=O)(=O)c1cccc(cc1)Cn1ene2c1cccc2                                                                                                |
| C325 | CacoP | CacoP+ | 13 | N#Cc1cccc(c1)Cn1nccc1                                                                                                              |
| C326 | CacoP | CacoP+ | 13 | O=C([O-])c1cccc(cc1)Cn1nccc1                                                                                                       |
| C327 | CacoP | CacoP+ | 13 | O=C([O-])Cc1cccc(cc1)Cn1nccc1                                                                                                      |
| C328 | CacoP | CacoP+ | 13 | [O-]C(=O)c1cccc(c1)Cc1nccc1                                                                                                        |
| C329 | CacoP | CacoP+ | 13 | NC(=O)c1cccc(c1)Cn1ene2c1cccc2                                                                                                     |
| C330 | CacoP | CacoP+ | 13 | NC(=O)c1cccc(c1)Cn1nccc1                                                                                                           |
| C331 | CacoP | CacoP+ | 13 | [NH3+]Cc1cccc(c1)Cn1nccc1                                                                                                          |
| C332 | CacoP | CacoP+ | 13 | CC(=O)N[C@H](Cc1cccc1)C(=O)N(C)[C@H](Cc1cccc1)C(=O)N[C@H](Cc1cccc1)C(=O)N                                                          |
| C333 | CacoP | CacoP+ | 13 | CC(=O)N[C@H](Cc1cccc1)C(=O)N[C@H](Cc1cccc1)C(=O)N[C@H](Cc1cccc1)C(=O)NC                                                            |
| C334 | CacoP | CacoP+ | 13 | FC(c1c(nc(cc1)N1CC[NH2+]CC1)Cl)(F)F                                                                                                |
| C335 | CacoP | CacoP+ | 13 | O=C1CC(C)(C)CC(=O)N1CCCC[NH+]1CCN(c2ncccn2)CC1                                                                                     |
| C336 | CacoP | CacoP+ | 13 | O=C1C(O)C(C)(C)CC(=O)N1CCCC[NH+]1CCN(c2ncccn2)CC1                                                                                  |
| C337 | CacoP | CacoP+ | 13 | FC(c1cc(ncc1)N1CC[NH+])(CCCCN2CCCC2=O)CC1)(F)F                                                                                     |
| C338 | CacoP | CacoP+ | 13 | Clc1cccc(cc1)C1c2c(cccc2)C2=NCCN2C1                                                                                                |
| C339 | CacoP | CacoP+ | 13 | O=C1CC(C)C(=NN1)c1cc2cc(c(cc2s1)OC)OC                                                                                              |
| C340 | CacoP | CacoP+ | 13 | [NH3+]C(CC=C)c1cccc1e1noc2c1cccc2                                                                                                  |
| C341 | CacoP | CacoP+ | 13 | O=C([C@H](OCc1cccc1)[C@H](O)[C@@H](O)[C@@H](OCc1cccc1)C(=O)N[C@@H](C(C)C)C(=O)NCC(F)(F)F)N[C@@H]1[C@H](O)Cc2c1cccc2                |
| C342 | CacoP | CacoP+ | 13 | O=C(c1cc(nc(c1)N(C)[C@H]1[C@@H](C)C1)C)N(C)S(=O)(=O)C)N[C@@H](Cc1cccc1)[C@@H](O)C[C@@H](OC)C(=O)N[C@@H](C(C)C)C(=O)NCc1cccc1       |
| C343 | CacoP | CacoP+ | 13 | O=C([O-])C[C@H](O)C[C@H](O)/C=C/c1c(c(c(nc1C(C)C)C(C)C)COC)c1cccc(c1)F                                                             |
| C344 | CacoP | CacoP+ | 13 | O=C1NCC2(CCC[NH2+]C2)c2c1cc([nH]2)c1eene(n1)c1cc2e(cc1)OCO2                                                                        |
| C345 | CacoP | CacoP+ | 13 | c1(ccccc1)Cn1c(nnn1)C([NH+]1CCN(C2CCC2)CCC1)c1ccc2occc2c1                                                                          |
| C346 | CacoP | CacoP+ | 13 | O=C1CC([NH+]2CCC[NH+])(CCCN3c4c(ccc(c4)C(=O)[O-])OCc4c3cccc4)CC2)N(C)C(=O)N1C                                                      |
| C347 | CacoP | CacoP+ | 13 | O=C1C[C@@H]([N@H+]2CC[N@@H+])(CCCN3c4c(ccc(c4)CC(=O)[O-])OCc4c3cccc4)CC2)N(C)C(=O)N1C                                              |
| C348 | CacoP | CacoP+ | 13 | O=C1CC([NH+]2CCC[NH+])(CCCN3c4c(ccc(c4)C(C)(C)C(=O)[O-])CCc4c3cccc4)CC2)N(C)C(=O)N1C                                               |
| C349 | CacoP | CacoP+ | 13 | Clc1c(cc(c2c1O[C@@]1(C(=CC(=O)C[C@H]1C)OC)C2=O)OC)OC O=C1CC([NH+]2CCC[NH+])(CCCN3c4c(ccc(c4)C(=O)[O-])OCc4c3cccc4)CC2)N(C)C(=O)N1C |
| C350 | CacoP | CacoP+ | 13 | O=C1C[C@@H]([N@H+]2CC[N@@H+])(CC/C=C/3\c4c(ccc(c4)CC(=O)[O-])OCc4c3cccc4)CC2)N(C)C(=O)N1C                                          |
| C351 | CacoP | CacoP+ | 13 | O=C1C[C@@H]([N@H+]2CC[N@@H+])(CC/C=C/3\c4c(ccc(c4)C(=O)[O-])OCc4c3cccc4)CC2)N(C)C(=O)N1C                                           |
| C352 | CacoP | CacoP+ | 13 | O=C1C[C@@H]([N@H+]2CC[N@@H+])(CC/C=C/3\c4c(ccc(c4)CC(=O)[O-])OCc4c3cccc4)CC2)N(C)C(=O)N1C                                          |
| C353 | CacoP | CacoP+ | 13 | O=C1CC([NH+]2CCC[NH+])(CC/C=C/3\c4c(ccc(c4)CC(=O)[O-])OCc4c3cccc4)CC2)N(C)C(=O)N1C                                                 |
| C354 | CacoP | CacoP+ | 13 | O=C1C(c2cccc2)(c2cccc2)C(=O)N(COC)C(=O)N1COC                                                                                       |
| C355 | CacoP | CacoP+ | 13 | [NH3+][C@@H](CCCCC)C(=O)N[C@@H](Cc1ccc(cc1)O)C(=O)NCC(=O)NCC(=O)N[C@@H](Cc1cccc1)C(=O)N[C@@H](CC(C)C)C(=O)N                        |
| C356 | CacoP | CacoP+ | 13 | CCCCCCCCC(=O)OC                                                                                                                    |
| C357 | CacoP | CacoP+ | 13 | CCCCCCCCC(=O)OCCC                                                                                                                  |
| C358 | CacoP | CacoP+ | 13 | CCCCCCCCC(=O)Oc1c(cccc1)F                                                                                                          |
| C359 | CacoP | CacoP+ | 13 | O=C(c1ccc(cc1)F)CCC[NH+]1CCC(O)(c2ccc(cc2)Cl)CC1                                                                                   |
| C360 | CacoP | CacoP+ | 13 | CCCCCCCCC(=O)Oc1cccc1                                                                                                              |
| C361 | CacoP | CacoP+ | 13 | CCCCCCCCC(=O)Nc1nccc1                                                                                                              |
| C362 | CacoP | CacoP+ | 13 | CCCCCCCCC(=O)Nc1enccc1                                                                                                             |
| C363 | CacoP | CacoP+ | 13 | CCCCCCCCC(=O)OCC(C)C                                                                                                               |
| C364 | CacoP | CacoP+ | 13 | CCCCCCCCC(=O)Nc1c(c(ccc1)C)C                                                                                                       |
| C365 | CacoP | CacoP+ | 13 | [NH3+]Nc1nccc2cccc12                                                                                                               |
| C366 | CacoP | CacoP+ | 13 |                                                                                                                                    |

|      |       |        |    |                                                                                                                            |
|------|-------|--------|----|----------------------------------------------------------------------------------------------------------------------------|
| C367 | CacoP | CacoP+ | 13 | CCCCCCCCC(=O)NCCO                                                                                                          |
| C368 | CacoP | CacoP+ | 13 | CCCCCCCCC(=O)NNe1cccc1                                                                                                     |
| C369 | CacoP | CacoP+ | 13 | CCCCCCCCC(=O)NCe1cccc1                                                                                                     |
| C370 | CacoP | CacoP+ | 13 | CCCCCCCCC(=O)N1CC[NH2+]CC1                                                                                                 |
| C371 | CacoP | CacoP+ | 13 | Oe1cc2c(c(c1)O)C(=O)OCC(CCC(CCCCC2)O)C                                                                                     |
| C372 | CacoP | CacoP+ | 13 | O=c1c2c(cc(cc2O)O)oc(c1)c1cc(c(c1)OC)OC)O                                                                                  |
| C373 | CacoP | CacoP+ | 13 | O=c1c2c(cc(c(c2O)OC)OC)oc(c1OC)c1cc(c(cc1)O)O                                                                              |
| C374 | CacoP | CacoP+ | 13 | C[C@]12CCCC(=O)C=C1CC[C@@H]1[C@@H]2[C@H](C[C@]2([C@H]1CC[C@@]2(C(=O)CO)O)C)O                                               |
| C375 | CacoP | CacoP+ | 13 | CCC[C@@H](C(=O)C(=O)NC1CC1)NC(=O)[C@H]1[C@H]2CCC[C@H]2CN1C(=O)[C@@H](C(C)C)NC(=O)[C@@H](C1CCCC1)NC(=O)c1cccc1              |
| C376 | CacoP | CacoP+ | 13 | O=c1n2c(nc3c1cccc3)C(=O)c1c2cccc1                                                                                          |
| C377 | CacoP | CacoP+ | 13 | O[C@](C[NH+](Cc1ccc(cc1)Br)NC(=O)[C@@H](C(C)C)CC(=O)OC)(Cc1cccc1)C(=O)NC1c2cccc2C[C@H]1O                                   |
| C378 | CacoP | CacoP+ | 13 | O[C@@](C[N@@H+](Cc1ccc(cc1)/C=C\c1cccc1)NC(=O)[C@@H](C(C)C)CC(=O)OC)(Cc1cccc1)C(=O)N[C@H]1c2cccc2C[C@@H]1O                 |
| C379 | CacoP | CacoP+ | 13 | O[C@](C[NH+](Cc1ccc(cc1)Br)NC(=O)C(C)C)CC(=O)OC)(Cc1cccc1)C(=O)N[C@H](C(C)C)C(=O)NCCOC                                     |
| C380 | CacoP | CacoP+ | 13 | O[C@](C[NH+](Cc1ccc(cc1)Br)NC(=O)[C@@H](C(C)C)CC(=O)OC)(Cc1cccc1)C(=O)N[C@H](C(C)C)C(=O)NC                                 |
| C381 | CacoP | CacoP+ | 13 | O[C@](C[NH+](Cc1ccc(cc1)c1cccc1)NC(=O)[C@@H](C(C)C)CC(=O)OC)(Cc1cccc1)C(=O)N[C@H](C(C)C)C(=O)NC                            |
| C382 | CacoP | CacoP+ | 13 | O=C1[C@@H]2C[C@@H](Oc3nc(nc4c3cccc4)c3cccc3)C[C@H]2C(=O)N(CCCC/C=C\C[C@H]2[C@@](N1)(C(=O)[N-]S(=O)(=O)C1CC1)C2)C           |
| C383 | CacoP | CacoP+ | 13 | O=C1[C@@H]2C[C@@H](Oc3nc(nc4c3ccc(e4)OC)c3nc(es3)C(C)C)[C@H]2C(=O)N(CCCC/C=C\C[C@H]2[C@@](N1)(C(=O)[N-]S(=O)(=O)C1CC1)C2)C |
| C384 | CacoP | CacoP+ | 13 | CC(C)Cc1ccc(cc1)C(C)C(=O)NO                                                                                                |
| C385 | CacoP | CacoP+ | 13 | O=C1[C@@H]2C[C@@H](Oc3nc(nc4c3ccc(e4)OC)c3ccc(cc3)F)C[C@H]2C(=O)N(CCCC/C=C\C[C@H]2[C@@](N1)(C(=O)[N-]S(=O)(=O)C1CC1)C2)C   |
| C386 | CacoP | CacoP+ | 13 | O=C1N[C@@]2C[C@H]2/C=C/CCCN(C)C(=O)[C@H]2[C@H]1C[C@H](C2)Oe1nc(nc2c1ccc(e2C)OC)c1cccc1)C(=O)[N-]S(=O)(=O)C1CC1             |
| C387 | CacoP | CacoP+ | 13 | O=C1[C@@H]2C[C@@H](Oc3nc(nc4c3ccc(e4)OC)c3ccc(cc3)OC)C[C@H]2C(=O)N(CCCC/C=C\C[C@H]2[C@@](N1)(C(=O)[N-]S(=O)(=O)C1CC1)C2)C  |
| C388 | CacoP | CacoP+ | 13 | O=C1N[C@@]2C[C@H]2/C=C/CCCCNC(=O)[C@H]2[C@H]1C[C@H](C2)Oe1nc(nc2c1ccc(e2C)OC)c1cccc1)C(=O)[N-]S(=O)(=O)C1CC1               |
| C389 | CacoP | CacoP+ | 13 | Ce1c(cc(cc1)NC(=O)c1ccc(cc1)C[NH+]1CCN(C)CC1)Nc1cccc(n1)c1cccc1                                                            |
| C390 | CacoP | CacoP+ | 13 | N#Cc1c(nc(c1)F)Cl)Cl                                                                                                       |
| C391 | CacoP | CacoP+ | 13 | O=C([O-])Cc1cccc(c1N)C(=O)c1cccc1                                                                                          |
| C392 | CacoP | CacoP+ | 13 | C[C@H]1C[C@@H](C(=O)[C@@H](C1)[C@@H](CC1CC(=O)NC(=O)C1)O)C                                                                 |
| C393 | CacoP | CacoP+ | 13 | O=C(OCC)C(SP(=S)(OC)OC)CC(=O)OCC                                                                                           |
| C394 | CacoP | CacoP+ | 13 | C[NH+](C)CCCN1c2cccc2CCe2c1cccc2                                                                                           |
| C395 | CacoP | CacoP+ | 13 | Oe1c(c(c(c1Cl)Cl)Cl)Cl)Cl                                                                                                  |
| C396 | CacoP | CacoP+ | 13 | O=c1[nH]c(nc2c1c(c(cc2)C)Sc1cccc1)N                                                                                        |
| C397 | CacoP | CacoP+ | 13 | CN(CCCNC(=O)C1CCCO1)c1nc2cc(c(cc2c(n1)N)OC)OC                                                                              |
| C398 | CacoP | CacoP+ | 13 | O=C(c1c(oc2cccc12)CCCC)c1cc(c(c1)I)OCC[NH+](CC)CC)I                                                                        |
| C399 | CacoP | CacoP+ | 13 | O=C(NCc1ccc(cc1)OCC[NH+](C)C)c1cc(c(c1)OC)OC)OC                                                                            |
| C400 | CacoP | CacoP+ | 13 | CCCCC1=NC2(CCCC2)C(=O)N1Cc1ccc(cc1)c1cccc1c1n[n-]nn1                                                                       |
| C401 | CacoP | CacoP+ | 13 | O=c1n(CC[NH+]2CCC(C(=O)c3ccc(cc3)F)CC2)c(=O)c2c(cccc2)[nH]1                                                                |
| C402 | CacoP | CacoP+ | 13 | CC(=O)N1CCN(c2ccc(cc2)OC)[C@@H]2CO[C@@](Cn3ccnc3)(c3c(cc(cc3)Cl)Cl)O2)CC1                                                  |
| C403 | CacoP | CacoP+ | 13 | CC(c1cccc(c1)C(=O)c1cccc1)C(=O)[O-]                                                                                        |
| C404 | CacoP | CacoP+ | 13 | O=C(C1c2ccc(nc2CC1)C(=O)c1cccc1)[O-]                                                                                       |
| C405 | CacoP | CacoP+ | 13 | C[NH+]1CC/C=C\2/e3c(sec3)C(=O)Cc3cccc23)/CC1                                                                               |
| C406 | CacoP | CacoP+ | 13 | OC(C[NH2+]C(C)CCc1cccc1)c1ccc(c(c1)C(=O)N)O                                                                                |
| C407 | CacoP | CacoP+ | 13 | O=c1nc(N)ccn1[C@@H]1CS[C@H](CO)O1                                                                                          |
| C408 | CacoP | CacoP+ | 13 | Ce1c(ccnc1CS(=O)c1nc2cccc2[nH]1)OCC(F)(F)F c1c(cc(c(c1)O)c1cc(c(c1)I)O)I)CC(C(=O)[O-])                                     |
| C409 | CacoP | CacoP+ | 13 | ][NH3+] CCN(CC)C(=O)N[C@@H]1C[NH+](C[C@@H]2Cc3c[nH]c4cccc(c34)C2=C1)C                                                      |
| C410 | CacoP | CacoP+ | 13 | C[C@H]([NH3+])Cc1cccc1                                                                                                     |
| C411 | CacoP | CacoP+ | 13 | CCC(C)C(=O)OC1CC(C=C2C1C(C(C=C2)C)CCC1CC(C(=O)O1)O)C                                                                       |
| C412 | CacoP | CacoP+ | 13 |                                                                                                                            |



|      |       |        |    |                                                                                   |
|------|-------|--------|----|-----------------------------------------------------------------------------------|
| C459 | CacoP | CacoP+ | 13 | O=C1c2e(ccs2)S(=O)(=O)N(/C/1=C(\O)/Nc1ncccc1)C                                    |
| C460 | CacoP | CacoP+ | 13 | O=C(Nc1ccc(c(c1)C(F)(F)F)C#N)C(C)(O)CS(=O)(=O)c1ccc(cc1)F                         |
| C461 | CacoP | CacoP+ | 13 | CC(C)(C)c1ccc(cc1)C(CCC[NH+])1CCC(CC1)C(c1cccc1)(c1cccc1)O)O                      |
| C462 | CacoP | CacoP+ | 13 | O=C1CC[C@]2(C)[C@H]3CC[C@]4(C)[C@@H](O)CC[C@H]4[C@@H]3CCCC=C1                     |
| C463 | CacoP | CacoP+ | 13 | OC1=C(C(=O)N)C(=O)[C@@]2(O)C(=C3C(=O)c4c(cccc4[C@](O)(C)C3CC2[C@@H]1[NH+](C)C)O)O |
| C464 | CacoP | CacoP+ | 13 | O=C1N(C2CCC(=O)NC2=O)C(=O)c2c1cccc2                                               |
| C465 | CacoP | CacoP+ | 13 | CSc1ccc2c(c1)c(=O)n(en2)/C=C/C(=O)[O-]                                            |
| C466 | CacoP | CacoP+ | 13 | CC(C)(C)[NH2+]C[C@H](O)COc1nsnc1N1CCOCC1                                          |
| C467 | CacoP | CacoP+ | 13 | OC(COc1ccc(cc1)COCCOC(C)C)[NH2+]C(C)C                                             |
| C468 | CacoP | CacoP+ | 13 | O=C([O-])Cc1ccc(n1C)C(=O)c1ccc(cc1)C                                              |
| C469 | CacoP | CacoP+ | 13 | OC1(c2cc(ccc2)OC)C(C[NH+](C)C)CCCC1                                               |
| C470 | CacoP | CacoP+ | 13 | O=c1n(CCC[NH+]2CCN(c3cccc(c3)Cl)CC2)nc2cccn12                                     |
| C471 | CacoP | CacoP+ | 13 | Cc1nnc2n1c1ccc(cc1C(=NC2)c1cccc1Cl)Cl                                             |
| C472 | CacoP | CacoP+ | 13 | COc1cc(cc(c1OC)OC)Cc1nnc(nc1N)N                                                   |
| C473 | CacoP | CacoP+ | 13 | C1[C@@H]2[C@H](C2[NH3+])CN1c1c(cc2c(n1)n(cc2=O)C(=O)[O-])c1c(cc(cc1)F)F           |
| C474 | CacoP | CacoP+ | 13 | CC(c1ccc2c(c1)CC(=O)c1e(cccc1)S2)C(=O)[O-]                                        |
| C475 | CacoP | CacoP+ | 13 | Cc1cn(c(=O)[nH]c1=O)C1CC(C(O1)CO)N=[N+]=[N-]                                      |
| C476 | CacoP | CacoP+ | 13 | O=C1Cc2cc(c(cc2N1)Cl)CC[NH+]1CCN(c2nsc3cccc23)CC1                                 |
| C477 | CacoP | CacoP+ | 13 | Oc1cccc1C(=O)[O-]                                                                 |
| C478 | CacoP | CacoP+ | 13 | O=c1cc(c2cccc2)oc2c1cccc2                                                         |
| C479 | CacoP | CacoP+ | 13 | [NH3+]CCc1ccc(c(c1)O)O                                                            |
| C480 | CacoP | CacoP+ | 13 | CC1(C)[C@@]2(CC)CC[N@@H+](CC3(CC3)O)[C@@H]1Cc1ccc(cc21)O                          |
| C481 | CacoP | CacoP+ | 13 | O=C(NC)[C@H](NC(=O)C(Cc1cccc1)NC(=O)C)Cc1cccc1                                    |
| C482 | CacoP | CacoP+ | 13 | O=C([C@@H](C(C)C)NC(=O)C)NCCc1cccc1                                               |
| C483 | CacoP | CacoP+ | 13 | O=C([C@H](Cc1cccc1)NC(=O)C)NCCc1cccc1                                             |
| C484 | CacoP | CacoP+ | 13 | O=C(C(CC1CCCC1)NC(=O)C)NCCc1cccc1                                                 |
| C485 | CacoP | CacoP+ | 13 | CC([NH2+]C(C)C)C(=O)c1cc(ccc1)Cl                                                  |
| C486 | CacoP | CacoP+ | 13 | O=S(=O)(c1ccc2cccc2c1)NC(Cc1cc(ccc1)C[NH3+])CC(=O)N1CCC(C)CC1                     |
| C487 | CacoP | CacoP+ | 13 | O=C1CC[C@]2(C)[C@H]3[C@@H](O)C[C@]4(C)[C@@H](C(=O)CO)CC[C@H]4[C@@H]3CCCC=C1       |
| C488 | CacoP | CacoP+ | 13 | O=C(CCC)Nc1ccc(c(c1)C(=O)C)OCC(OC(=O)C1CC1)C[NH2+]C(C)C                           |
| C489 | CacoP | CacoP+ | 13 | C=CCc1cccc1OCC(OC(=O)C1CC1)C[NH2+]C(C)C                                           |
| C490 | CacoP | CacoP+ | 13 | CC(C)[NH2+]CC(OC(=O)C1CC1)COc1ccc(cc1)CCOCC1CC1                                   |
| C491 | CacoP | CacoP+ | 13 | O=C([O-])C1=CC(C(C(O1)C(C(O)CO)OC(=O)CNC(=O)C(C)C)C[NH3+])NC(=O)C)N=C(N)N         |
| C492 | CacoP | CacoP+ | 13 | CC(C)(C)[NH2+]C[C@H](OC(=O)C1CC1)COc1nsnc1N1CCOCC1                                |
| C493 | CacoP | CacoP+ | 13 | O=c1c(en(C2CC2)c2c1cc(c(c2)N1CC[NH2+]C(C)C1)F)C(=O)[O-]                           |
| C494 | CacoP | CacoP+ | 13 | O=c1c(en(C2CC2)c2c1cc(c(c2)N1CC[NH+](CCCC)C(C)C1)F)C(=O)[O-]                      |
| C495 | CacoP | CacoP+ | 13 | [C@@H]12CC[C@]3(C)O[C@@H]4[C@]1(OO3)[C@H]([C@@H](C)C(=O)O4)CC[C@H]2C              |
| C496 | CacoP | CacoP+ | 13 | O=C(Nc1cccc(c1)OCCC)OCC[NH+]1CCCC1                                                |
| C497 | CacoP | CacoP+ | 13 | O=C(Nc1cccc(c1)OCCCCC)OCC[NH+]1CCCC1                                              |
| C498 | CacoP | CacoP+ | 13 | CCCC(C)(COC(=O)N)COC(=O)NC(C)C                                                    |
| C499 | CacoP | CacoP+ | 13 | N/C(=N\OC)/c1ccc(cc1)c1ccc(o1)c1ccc(cc1)/C(=N\OC)/N                               |
| C500 | CacoP | CacoP+ | 13 | N#C[C@@](CCC[NH2+]CCc1cc(c(cc1)OC)OC)(c1cc(c(cc1)OC)OC)C(C)C                      |
| C501 | CacoP | CacoP+ | 13 | O=S(=O)(c1cc(c(cc1)OCCC)c1nc(=O)c2n(nc2[nH]1)CCC)NCCC1CCC[NH+]1C                  |
| C502 | CacoP | CacoP+ | 13 | C[C@H]1Cc2c(c(c3c(c2)OCO3)OC)c2c(cc(c(c2OC)OC)OC)C[C@]1(C)O                       |
| C503 | CacoP | CacoP+ | 13 | Fc1ccc2c(c1)CC[C@](OC(=O)COC)(CC[NH+](C)CCCc1nc3cccc3[nH]1)[C@H]2C(C)C            |
| C504 | CacoP | CacoP+ | 13 | CC(n1c2cccc2n2cnc(c2c1=O)c1noc(n1)C1CC1)C                                         |

|      |       |        |    |                                                                                                                            |
|------|-------|--------|----|----------------------------------------------------------------------------------------------------------------------------|
| C505 | CacoP | CacoP+ | 13 | [NH3+][C@@H](C1cccc1)C(=O)N1[C@H](C(=O)[O-])CCC1                                                                           |
| C506 | CacoP | CacoP+ | 13 | O=c1[nH]c(=O)n(cc1/C=C/Br)[C@@H]1[C@H](O)[C@@H](O)[C@H](CO)O1                                                              |
| C507 | CacoP | CacoP+ | 13 | C[NH+]1CCC(c2c[nH]c3c2cc(cc3)NC(=O)c2ccc(cc2)F)CC1                                                                         |
| C508 | CacoP | CacoP+ | 13 | CCCOe1cc2c(cc1)[C@H](c1ccc3c(c1)OCO3)[C@@H](C(=O)[O-])[C@@H]2c1c(cc(cc1)OC)OCCO                                            |
| C509 | CacoP | CacoP+ | 13 | [NH3+][C@@H](C)C(=O)[O-]                                                                                                   |
| C510 | CacoP | CacoP+ | 13 | NC(=Nc1nc(cs1)CSCCN/C(=N/C)/NC#N)N                                                                                         |
| C511 | CacoP | CacoP+ | 13 | COe1ccc2c(ccc(c2)C(C)C(=O)[O-])c1                                                                                          |
| C512 | CacoP | CacoP+ | 13 | O=C([C@@H](C1cccc1)NC(=O)C1(CCCC1)NC(=O)c1cc2ccc(cc2s1)C)NCC1CC[NH+](CC1)CC1CCOCC1                                         |
| C513 | CacoP | CacoP+ | 13 | OC(C[NH2+])C(C)C)COe1ccc(cc1)NC=O                                                                                          |
| C514 | CacoP | CacoP+ | 13 | [NH3+]c1cc(c[nH]c1=O)c1ccncc1                                                                                              |
| C515 | CacoP | CacoP+ | 13 | CC1=C(N2[C@@H]([C@@H](C2=O)NC(=O)C(C2=CCC=CC2)[NH3+])SC1)C(=O)[O-]                                                         |
| C516 | CacoP | CacoP+ | 13 | CC(=O)N[C@@H](C1cccc1)C(=O)N(C)[C@H](C1cccc1)C(=O)N(C)[C@@H](C1cccc1)C(=O)N                                                |
| C517 | CacoP | CacoP+ | 13 | CC(=O)N(C)[C@@H](C1cccc1)C(=O)N(C)[C@@H](C1cccc1)C(=O)N(C)[C@@H](C1cccc1)C(=O)N                                            |
| C518 | CacoP | CacoP+ | 13 | O=C([O-])COCC[NH+]1CC[NH+](C(c2ccc(cc2)Cl)c2ccc(c2)CC1                                                                     |
| C519 | CacoP | CacoP+ | 13 | Fe1cc(ccc1N1CCOCC1)N1C[C@H](CNC(=O)C)OC1=O                                                                                 |
| C520 | CacoP | CacoP+ | 13 | Fe1cc(ccc1N1CCN(C(=O)CO)CC1)N1C[C@H](CNC(=S)C)OC1=O                                                                        |
| C521 | CacoP | CacoP+ | 13 | Fe1cc(ccc1N1CCS(=O)CCC1)N1C[C@H](CNC(=S)C)OC1=O                                                                            |
| C522 | CacoP | CacoP+ | 13 | Fe1cc(ccc1N1CCN(C(=O)CC1)N1C[C@H](CNC(=S)CC)OC1=O                                                                          |
| C523 | CacoP | CacoP+ | 13 | Fe1c(ccc(c1)N1C[C@H](CNC(=O)CC)OC1=O)c1nnes1                                                                               |
| C524 | CacoP | CacoP+ | 13 | Fe1c(ccc(c1)N1C[C@H](CNC(=O)C)OC1=O)c1ene(cc1)C#N                                                                          |
| C525 | CacoP | CacoP+ | 13 | Fe1c(ccc(c1)N1C[C@H](CNC(=S)C)OC1=O)c1nne(s1)C[NH3+]                                                                       |
| C526 | CacoP | CacoP+ | 13 | Fe1c(ccc(c1)N1C[C@H](CNC(=O)CC)OC1=O)n1ncc(c1)C#N                                                                          |
| C527 | CacoP | CacoP+ | 13 | Fe1c(ccc(c1)N1C[C@H](CNC(=S)C)OC1=O)N1CCS(=O)(=O)CCC1                                                                      |
| C528 | CacoP | CacoP+ | 13 | Fe1c(ccc(c1)N1C[C@H](CNC(=O)C)OC1=O)c1nne(s1)CC/C(=N\O)/C                                                                  |
| C529 | CacoP | CacoP+ | 13 | Fe1c(ccc(c1)N1C[C@H](CNC(=S)C)OC1=O)c1nne(s1)CNS(=O)(=O)C                                                                  |
| C530 | CacoP | CacoP+ | 13 | Ne1nc2ccc(cc2n1C(C)C)C(C(=O)NC)c1cccc(c1)F                                                                                 |
| C531 | CacoP | CacoP+ | 13 | O=C([C@@H](NC(=O)c1ccc(cc1)C(=O)N1CCOCC1)C(C)C)N1[C@H](C(=O)NC(C(C)C)C(=O)C(F)F)C(F)F)CCC1                                 |
| C532 | CacoP | CacoP+ | 13 | Ne1nc2ccc(cc2n1S(=O)(=O)NC(C)C)C(C(=O)N)c1cccc(c1)F                                                                        |
| C533 | CacoP | CacoP+ | 13 | C[NH+](C)CCC(c1ccc(cc1)Cl)c1ncccc1                                                                                         |
| C534 | CacoP | CacoP+ | 13 | Cc1c(sc[n+])1Cc1enc(nc1N)C)CCO                                                                                             |
| C535 | CacoP | CacoP+ | 13 | CCCSelcc2c(cc1)nc([nH]2)NC(=O)OC                                                                                           |
| C536 | CacoP | CacoP+ | 13 | COe1cc(c(c2c1OCO2)c1c(cc(c2c1OCO2)OC)C(=O)OC)CO                                                                            |
| C537 | CacoP | CacoP+ | 13 | O=c1[nH]c(=O)n(cc1F)[C@H]1O[C@@H](COC(=O)C(Cc2ccc2)[NH3+])[C@H](O)C1                                                       |
| C538 | CacoP | CacoP+ | 13 | O=c1[nH]c(=O)n(cc1F)[C@H]1O[C@@H](COC(=O)C[NH3+])[C@H](O)C1                                                                |
| C539 | CacoP | CacoP+ | 13 | O=c1[nH]c(=O)n(cc1F)[C@H]1O[C@@H](COC(=O)CNC(=O)C(CC(C)C)[NH3+])[C@H](O)C1                                                 |
| C540 | CacoP | CacoP+ | 13 | C[NH+](C)CC/C=C/1\c2c(ccc(c2)Cl)Sc2c1cccc2                                                                                 |
| C541 | CacoP | CacoP+ | 13 | O=c1[nH]c(=O)n(cc1F)[C@H]1O[C@@H](COC(=O)C(CC(C)C)NC(=O)C[NH3+])[C@H](O)C1                                                 |
| C542 | CacoP | CacoP+ | 13 | O=c1[nH]c(=O)n(cc1F)[C@@H]1O[C@@H](COC(=O)[C@@H](Cc2ccc(cc2)O)NC(=O)[C@@H](Cc2ccc2)[NH3+])[C@@H](O)C1                      |
| C543 | CacoP | CacoP+ | 13 | Oe1cc(ccc1O)C=O                                                                                                            |
| C544 | CacoP | CacoP+ | 13 | CN(C)c1ccc(cc1)C(=O)NCCCCNC(=O)CS                                                                                          |
| C545 | CacoP | CacoP+ | 13 | NC(=O)[C@@H](NC(=O)C(Cc1c[nH]c2c1cccc2)NC(=O)[C@@H]1N(C(=O)[C@H](Cc2ccc(cc2)O)NC(=O)C([NH3+])CCCC)CCC1)Cc1cccc1            |
| C546 | CacoP | CacoP+ | 13 | Ce1c(c(ccc1)C)OCC(=O)N[C@@H](Cc1cccc1)[C@@H](OC(=O)[C@H](C(C)C)NC(=O)C[NH3+])C[C@@H](Cc1cccc1)NC(=O)[C@@H](C(C)C)N1CCNC1=O |
| C547 | CacoP | CacoP+ | 13 | O=C(c1en(C2CC2)c2c(cc(c2)N2CC[NH2+])CC2)F)c1=O)[O-]                                                                        |
| C548 | CacoP | CacoP+ | 13 | O=c1ccc2c(cc(cc2)O)o1                                                                                                      |
| C549 | CacoP | CacoP+ | 13 | C/C=C(C(=O)O)[C@@H]([C@H](O)C(C)O)C)c1c(cc2c(c1)ccc(=O)o2)OC)/C                                                            |
| C550 | CacoP | CacoP+ | 13 | CC(=O)CCCC/C=C\CC#CC#C                                                                                                     |

|      |       |        |    |                                                                                          |
|------|-------|--------|----|------------------------------------------------------------------------------------------|
| C551 | CacoP | CacoP+ | 13 | COC1C[NH+](CCC1NC(=O)c1ccc(cc1OC)N)C1CCCOc1ccc(cc1)F                                     |
| C552 | CacoP | CacoP+ | 13 | O=S(=O)(Nc1ccc2c1CCN(c1nc(c3c(c(cc3n1)OC)OC)c1ccc1)N)C2)C                                |
| C553 | CacoP | CacoP+ | 13 | O=C(NO)/C=C/c1cc2c(cc1)n(c(n2)CCc1ccc1)CC[NH+]1CCCC1                                     |
| C554 | CacoP | CacoP+ | 13 | O=S(=O)(N(Cc1ccc(c1)n1ccc1)C1CN(Cc2cnc2C)c2ccc(cc2C1)C#N)c1ccc1                          |
| C555 | CacoP | CacoP+ | 13 | O=S(=O)(N(Cc1c(oc1C)C)C1CN(Cc2cnc2C)c2ccc(cc2C1)C#N)c1ccc1                               |
| C556 | CacoP | CacoP+ | 13 | O=S(=O)(N(CC1CCN(C(=O)OC(C)C)CC1)C1CN(Cc2cnc2C)c2ccc(cc2C1)C#N)c1ccc1                    |
| C557 | CacoP | CacoP+ | 13 | Clc1ccc(c1NC1=NCCN1)C1                                                                   |
| C558 | CacoP | CacoP+ | 13 | O=C(N[C@H](C(=O)NCCC[NH+]1CCOCC1)Cc1ccc1)C1(NC(=O)c2cc3ccc3s2)CCCC1                      |
| C559 | CacoP | CacoP+ | 13 | O=C(NCCC[NH+]1CCOCC1)[C@@H](Cc1ccc1)NC(=O)C1(CCCC1)NC(=O)c1ccc(cc1)c1ccc1                |
| C560 | CacoP | CacoP+ | 13 | O=C(NCCC[C@H]1CC[N@@H+](CC2CCOCC2)CC1)[C@@H](Cc1ccc1)NC(=O)C1(CCCC1)NC(=O)c1cc2ccc2s1    |
| C561 | CacoP | CacoP+ | 13 | Nc1ccc1                                                                                  |
| C562 | CacoP | CacoP+ | 13 | O=C(N)c1ccc1                                                                             |
| C563 | CacoP | CacoP+ | 13 | Clc1ccc1                                                                                 |
| C564 | CacoP | CacoP+ | 13 | O=Cc1ccc1                                                                                |
| C565 | CacoP | CacoP+ | 13 | Nc1ccc1                                                                                  |
| C566 | CacoP | CacoP+ | 13 | c1(ccnc1)Cc1ccc1                                                                         |
| C567 | CacoP | CacoP+ | 13 | CCc1ccc1                                                                                 |
| C568 | CacoP | CacoP+ | 13 | c1(ccnc1)c1ccc1                                                                          |
| C569 | CacoP | CacoP+ | 13 | C[NH+]1C2CC[C@@H]1C[C@H](OC(c1ccc1)Cl)c1ccc1)C2                                          |
| C570 | CacoP | CacoP+ | 13 | CCCCCCCCCCCCCOP(=O)([O-])OCC[N+](C)(C)C                                                  |
| C571 | CacoP | CacoP+ | 13 | O=c1cc(c2ccc2)oc2c1ccc(c2)OC                                                             |
| C572 | CacoP | CacoP+ | 13 | O=c1cc(c2ccc(cc2)OC)oc2c1c(cc(c2)OC)OC                                                   |
| C573 | CacoP | CacoP+ | 13 | O=c1cc(c2ccc(cc2)O)oc2c1ccc(c2)O                                                         |
| C574 | CacoP | CacoP+ | 13 | O=c1cc(c2ccc2)oc2c1c(cc(c2)O)O                                                           |
| C575 | CacoP | CacoP+ | 13 | C1C(C(=O)NO1)[NH3+]                                                                      |
| C576 | CacoP | CacoP+ | 13 | Oc1ccc1C(=O)OC(=O)C                                                                      |
| C577 | CacoP | CacoP+ | 13 | NC(=N)c1ccc(cc1)COc1ccc2c(c1)C(=O)N(CC(=O)N2C)CCC(=O)[O-]                                |
| C578 | CacoP | CacoP+ | 13 | CC1C(C(CC(O1)OC1CCC2(C3CCC4(C(CCC4(C3CCC2(C1)O)O)C1=CC(=O)OC1)C)C=O)OC)O                 |
| C579 | CacoP | CacoP+ | 13 | CC[C@@]1(O)c2c(c(=O)n3c(c2)Cc2nc4ccc4cc32)COC1=O                                         |
| C580 | CacoP | CacoP+ | 13 | Nc1nc2ccc(cc2n1S(=O)(=O)NC(C)C)C(C(=O)N)c1ccc2c1ccc2                                     |
| C581 | CacoP | CacoP+ | 13 | C#CC#CCC/C=C\C=C(=O)NCC(C)C                                                              |
| C582 | CacoP | CacoP+ | 13 | C/C=C/C#CCC/C=C\C=C(=O)NCC(C)C                                                           |
| C583 | CacoP | CacoP+ | 13 | CCC/C=C\CC/C=C/C=C(=O)NCC(C)C                                                            |
| C584 | CacoP | CacoP+ | 13 | CC#CC#CCCC/C=C/C(=O)NCC(C)CC                                                             |
| C585 | CacoP | CacoP+ | 13 | C#CC#CC/C=C\CCCC/C=C/C(=O)NCC(C)C                                                        |
| C586 | CacoP | CacoP+ | 13 | CC1=NCCc2c1[nH]c1c2ccc(c1)O                                                              |
| C587 | CacoP | CacoP+ | 13 | Cc1ccc2c1[nH]c1c2ccc(c1)OC                                                               |
| C588 | CacoP | CacoP+ | 13 | Nc1nc2c(ncn2COCCOC(=O)C(C)C)NC(=O)C[NH3+])c(=O)[nH]1                                     |
| C589 | CacoP | CacoP+ | 13 | O=c1c(coc2c1c(cc2)O)O)c1ccc(cc1)O                                                        |
| C590 | CacoP | CacoP+ | 13 | O=C([C@H]1N(C(=O)[C@H](C)CSN=O)CCC1)[O-]                                                 |
| C591 | CacoP | CacoP+ | 13 | O=C([N-]S(=O)(=O)c1ccc(cc1OC)C)C(c1cc2c(cc1)OCO2)c1cn(c2c1ccc(c2)Cl)C                    |
| C592 | CacoP | CacoP+ | 13 | O=C([N-]S(=O)(=O)c1ccc(cc1OC)C)C(c1cc2c(cc1)OCO2)c1cn(c2c1ccc(c2)COC)C                   |
| C593 | CacoP | CacoP+ | 13 | C[C@@H]1C[C@H]2[C@@H]3CCC4=CC(=O)C=C[C@]4(C)[C@@]3(F)[C@@H](O)C[C@]2(C)[C@]1(C(=O)CO)O   |
| C594 | CacoP | CacoP+ | 13 | O=C(NC(=O)c1cc2c(s1)CC[NH2+]C2)c1ccc(c(c1)OCC(=O)OCCCC)OCC(=O)OCCCC                      |
| C595 | CacoP | CacoP+ | 13 | Cc1c(c(cc1O)C)C[C@H]([NH3+])C(=O)N[C@@H](CCCNC(=N)N)C(=O)NC(Cc1ccc1)C(=O)NC(CCCCN)C(=O)N |
| C596 | CacoP | CacoP+ | 13 | O=C(NCCC[NH+]1CCOCC1)[C@@H](Cc1ccc1)NC(=O)C1(CCCC1)NC(=O)c1cc2ccc2n1C                    |









|      |       |        |      |                                                                                                                                                      |
|------|-------|--------|------|------------------------------------------------------------------------------------------------------------------------------------------------------|
| C735 | CacoP | CacoP- | 13   | Ne1nc2c(ncn2C2[C@@H](CO)C[C@@H]2CO)c(=O)[nH]1                                                                                                        |
| C736 | CacoP | CacoP- | 13   | [C@H]1(NC(=O)OCOC(=O)[C@H](C)NC(=O)[C@@H](NC(=O)CNC(=O)CNC(=O)[C@@H](NC1=O)C)CC(=O)[O-])Cc1c[nH]c2c1cccc2                                            |
| C737 | CacoP | CacoP- | 13   | CC(Cc1cccc(c1)O)[NH2+][C@H](C1cc(cc1)O)O                                                                                                             |
| C738 | CacoP | CacoP- | 13   | c1(ccccc1)Cn1c(nnn1)C([NH+])CCN(C2CCC2)CCC1)c1ccc(cc1)Cn1cncn1                                                                                       |
| C739 | CacoP | CacoP- | 12,2 | CC([NH3+])(Cc1cc(c(cc1)O)O)C(=O)[O-]                                                                                                                 |
| C740 | CacoP | CacoP- | 13   | O=C(N[C@@H](C(=O)[O-])CCC(=O)O)c1ccc(cc1)NCc1cnc2c(n1)c(=O)nc(N)[nH]2                                                                                |
| C741 | CacoP | CacoP- | 13   | O=C([C@H](NC(=O)[C@H]1CCC(=O)N1)Cc1c[nH]cn1)N1[C@H](CCC1)C(=O)N                                                                                      |
| C742 | CacoP | CacoP- | 13   | C[C@H](NC(=O)[C@@H](Cc1cccc1)[NH3+])C(=O)N[C@H](CO)C(=O)[O-]                                                                                         |
| C743 | CacoP | CacoP- | 13   | NC(=N)c1ccc(cc1)C#Cc1ccc2c(c1)C(=O)N(CC(=O)N2C)CCC(=O)[O-]                                                                                           |
| C744 | CacoP | CacoP- | 12   | CC/C=C(C(=O)N[C@H]1[C@H]2SCC(=C(N2C1=O)C(=O)[O-])COC(=O)N)/c1csc(n1)N                                                                                |
| C745 | CacoP | CacoP- | 13   | Cc1e2c(c(c1)CCO[C@H]1O[C@@H](CO)[C@H](O)[C@@H](O)[C@@H]1O)O)[C@H]1O[C@@H](CO)[C@@H](O)[C@@H](O)[C@@H]1O)CC(C)C2=O                                    |
| C746 | CacoP | CacoP- | 13   | O=S(=O)(c1cccc1)N[C@@H](Cc1cc(c(cc1)[C@@H]1CC(=O)[N-]S1(=O)=O)C)c1nc2cccc2[nH]1                                                                      |
| C747 | CacoP | CacoP- | 13   | O=C([O-])c1cccc(c1)Cn1cnc1                                                                                                                           |
| C748 | CacoP | CacoP- | 13   | O=C([N-]S(=O)(=O)c1ccc(cc1)OC)C(C1cc2c(cc1)OCO2)c1cn(c2c1ccc(c2)C(=O)C)C                                                                             |
| C749 | CacoP | CacoP- | 13   | C[C@]12CC[C@H](O)C(C)(C)[C@@H]1CC[C@]1(C)[C@@H]2CC=C2[C@@]1(C)CC[C@]1(C(=O)[O-])[C@H]2CC(C)(C)CC1                                                    |
| C750 | CacoP | CacoP- | 13   | Fe1c(ccc(c1)N1C[C@H](CNC(=S)N)OC1=O)N1CCN(C(=O)CO)CC1                                                                                                |
| C751 | CacoP | CacoP- | 13   | O=C([O-])[C@H](OC(=O)/C=C/c1ccc(c(c1)O)O)[C@@H](O)C(=O)O                                                                                             |
| C752 | CacoP | CacoP- | 13   | [NH3+][C(Cc1ccc(cc1)O)C(=O)NC(CCCNC(=N)N)C(=O)NC(Cc1cccc1)C(=O)NC(Cc1cccc1)C(=O)N                                                                    |
| C753 | CacoP | CacoP- | 13   | Oc1cc(ccc1O)CC(C(=O)[O-])OC(=O)/C=C/c1ccc(c(c1)CC(=O)O)O                                                                                             |
| C754 | CacoP | CacoP- | 13   | O=c1nc(N)[nH]c2c1nnc2COCCO                                                                                                                           |
| C755 | CacoP | CacoP- | 13   | NC(=N)c1ccc2c(c1)[nH]c(n2)Cc1nc2c([nH]1)cccc2                                                                                                        |
| C756 | CacoP | CacoP- | 13   | O=S(=O)(Nc1cccc1)c1ccc(cc1)/N=N/c1cc(c(cc1)O)CC(=O)[O-]                                                                                              |
| C757 | CacoP | CacoP- | 13   | O=C(NCCC(=O)N1CC[NH+](C2CCOCC2)CC1)[C@@H](Cc1cccc1)NC(=O)C1(CCCC1)NC(=O)c1cc2cccc2s1                                                                 |
| C758 | CacoP | CacoP- | 13   | NC(=O)[C@@H](NC(=O)C(Cc1c[nH]c2c1cccc2)NC(=O)[C@@H]1N(C(=O)[C@H](Cc2c(cc(cc2)O)C)[NH3+])CCC1)Cc1cccc1 O=C([N-                                        |
| C759 | CacoP | CacoP- | 13   | ]S(=O)(=O)c1ccc(cc1)OC)[C@H](c1cc2c(cc1)OCO2)c1cn(c2c1ccc(c2)COC)CCOC                                                                                |
| C760 | CacoP | CacoP- | 13   | O=C1CC([NH+])2CCC[NH+](CCCNC3c4c(ccc4)C(C)C(=O)[O-])OCc4c3cccc4)CC2)N(C)C(=O)N1C                                                                     |
| C761 | CacoP | CacoP- | 13   | O=C(c1cc(nn1c1cccc(c1)C[NH3+])C)Nc1c(cc(cc1)c1cccc1S(=O)(=O)N)F                                                                                      |
| C762 | CacoP | CacoP- | 13   | O=C(N[C@H]1O[C@@H](C@@H)(O)[C@@H](O)[C@@H]1O)C(=O)N[C@@H](NC(=O)[C@@H](Cc1c[nH]c2c1cccc2)NC(=O)[C@H]1N(C(=O)[C@@H](Cc2ccc(cc2)O)[NH3+])CCC1)Cc1cccc1 |
| C763 | CacoP | CacoP- | 13   | O=C(NCC1CC[NH+](CC2CCOCC2)CC1)[C@@H](Cc1cccc1)NC(=O)C1(CCCC1)NC(=O)c1cc2ccc(cc2s1)F                                                                  |
| C764 | CacoP | CacoP- | 13   | Fe1c(ccc(c1)N1C[C@H](CNC(=S)N)OC1=O)C1CCS(=O)(=O)CC1                                                                                                 |
| C765 | CacoP | CacoP- | 13   | Oc1ccc(cc1)CC(C(=O)NC(C(=O)NC(C(=O)NC(C(=O)N)Cc1cccc1)Cc1cccc1)C)[NH3+]                                                                              |
| C766 | CacoP | CacoP- | 13   | O=S(=O)(c1ccc2cccc2c1)NC(Cc1ccc(cc1)C(=N)N)CC(=O)N1CCCC(C(=O)OC)C1                                                                                   |
| C767 | CacoP | CacoP- | 13   | O=C(NC)[C@H](NC(=O)CNC(=O)C)Cc1cccc1                                                                                                                 |
| C768 | CacoP | CacoP- | 13   | Clc1ccc(c(c1)OC)C[C@@H](C)C(=O)N1CCN(c2c(cc(cc2)Cl)[C@@H](NC(=O)C2C[NH2+]C2)C(C)C)CC1                                                                |
| C769 | CacoP | CacoP- | 13   | O=C(N[C@@H](Cc1cc(c(cc1)O)C(C)(C)C)C(=O)N)C(C(C)C)N(C)C(=O)[C@@H]([NH3+])Cc1cccc1                                                                    |
| C770 | CacoP | CacoP- | 13   | O=S(=O)(c1ccc2cccc2c1)NC(Cc1ccc(cc1)C(=N)N)CC(=O)N1CCN(C(=O)C)CC1                                                                                    |
| C771 | CacoP | CacoP- | 10   | CC1(C)SC2C(NC(=O)C([NH3+])c3ccc(cc3)O)C(=O)N2C1C(=O)[O-]                                                                                             |
| C772 | CacoP | CacoP- | 13   | O=C(NC)[C@H](NC(=O)[C@@H](CC(C)C)NC(=O)C)Cc1cccc1                                                                                                    |
| C773 | CacoP | CacoP- | 13   | O=c1c(coc2c1ccc(c2)O)[C@@H]1O[C@H](CO)[C@@H](O)[C@H](O)[C@@H]1O)c1ccc(cc1)O                                                                          |
| C774 | CacoP | CacoP- | 13   | O=C1NCC2(CC[NH+](CC)CC2)c2c1cc([nH]2)c1cnc(n1)c1cc2cccc2o1                                                                                           |
| C775 | CacoP | CacoP- | 13   | CC1(C)C2C1N(C(=O)C(NC(=O)NC(C)C(C)C)C2C(=O)NC(CC1CC1)C(=O)C(=O)N                                                                                     |
| C776 | CacoP | CacoP- | 13   | O[C@H]1[C@H](c2cc(c(c(c2)O)O)O)O)c2c(c(cc(c2)O)O)C1                                                                                                  |
| C777 | CacoP | CacoP- | 13   | O=C1OC2(c3c(cc(cc3)O)O)c3c2ccc(c3)O)c2c1cc(cc2)NC(=S)NCCCC[C@@H]([NH3+])C(=O)OC                                                                      |
| C778 | CacoP | CacoP- | 13   | NC(=N)c1ccc(cc1)COc1ccc2c(c1)C(=O)N(CC(=O)N2C)CCC(=O)OCC                                                                                             |
| C779 | CacoP | CacoP- | 13   | O=C(N[C@@H](C)C(=O)NCC(=O)NCC(=O)N[C@@H](CC(=O)N)C(=O)N[C@@H](C)C(=O)N)C(Cc1c[nH]c2cccc12)NC(=O)C                                                    |
| C780 | CacoP | CacoP- | 13   | O=C(C1CCC(F)(F)CC1)N[C@@H](CC[NH+])1C2CCC1CC(n1c(nnc1C)C(C)C)C2)c1cccc1                                                                              |



|      |       |        |                |                                                                                                                    |
|------|-------|--------|----------------|--------------------------------------------------------------------------------------------------------------------|
| C827 | CacoP | CacoP+ | 13             | Cc1c(c(no1)c1cccc1)C(=O)N[C@H]1[C@H]2SC(C)(C)[C@@H](N2C1=O)C(=O)[O-]                                               |
| C828 | CacoP | CacoP+ | 13             | O=C1NC(C2CCCC2)C(=O)N2CC(OC(CCOc3cc(ecc3)C1)(C)C)CC2C(=O)NC(CCC)C(=O)C(=O)NCC=C                                    |
| C829 | CacoP | CacoP+ | 13             | Cc1c(c(ccc1)Cl)NC(=O)c1nc(s1)Nc1nc(nc(c1)N1CC[NH+](CC1)CCO)C                                                       |
| C830 | CacoP | CacoP+ | 13             | O=C(N[C@@H](C(=O)N[C@H]1(CCC[C@H](C(=O)[O-])C1)NC(=O)[C@H]1CCCC[C@@H]1[NH3+])Cc1cccc1)C1(CCCCC1)NC(=O)c1cc2cccc2s1 |
| C831 | CacoP | CacoP+ | 13             | O=c1cc(CCC)[nH]c(=S)[nH]1                                                                                          |
| C832 | CacoP | CacoP+ | 12             | COC(=O)C1=C(C)NC(=C(C1c1cc(ccc1)[N+](=O)[O-])C(=O)OCC[NH+](C)Cc1cccc1)C                                            |
| C833 | CacoP | CacoP+ | 13             | FC(F)(F)c1nn(c(c1)c1ccc(cc1)C)c1ccc(cc1)S(=O)(=O)N                                                                 |
| C834 | CacoP | CacoP+ | 13             | O=c1oe2c(c3c(cco3)cc2cc1)OCC(C(=C)C)OC(C)(C)C(O)COc1c2c(cc3c1occ3)ccc(=O)o2                                        |
| C835 | CacoP | CacoP+ | 13             | O=C(c1nn(c(c1)C)c1ccc(cc1)Cl)c1ccc(cc1Cl)Cl)N[NH+]1CCCCC1                                                          |
| C836 | CacoP | CacoP+ | 13             | O=c1c(c(nc2n1CCCC2)C)CC[NH+]1CCC(CC1)c1noc2c1ccc(e2)F                                                              |
| C837 | CacoP | CacoP+ | 13             | CN(C(=O)C[NH3+])CC(=O)[O-]                                                                                         |
| C838 | CacoP | CacoP+ | 13             | O=c1c(c(CC)oc(c1Cc1c(c(c(c1O)C(=O)C)O)CC=C(C)C)O)O)C                                                               |
| C839 | CacoP | CacoP+ | 13             | Cc1c2c(c(c(c1CCO)C)O)CC(C)(C)C2=O                                                                                  |
| C840 | CacoP | CacoP+ | 13             | COc1cc2nnc(c2cc1OCCC[NH+]1CCOCC1)Nc1ccc(c(c1)Cl)F                                                                  |
| C841 | CacoP | CacoP+ | 10,11,12,4,6,2 | O=C1NC(=O)C(N1)(c1cccc1)c1cccc1                                                                                    |
| C842 | CacoP | CacoP+ | 13             | [O-]C(=O)CC1(CNC(=O)OC(C)OC(=O)C(C)C)CCCCC1                                                                        |
| C843 | CacoP | CacoP+ | 13             | O=C([O-])CC1(C[NH3+])CCCCC1                                                                                        |
| C844 | CacoP | CacoP+ | 13             | O=S(=O)(c1ccc(cc1)CCCCCCCCCCCC)Nc1nncs1                                                                            |
| C845 | CacoP | CacoP+ | 13             | O=S(=O)(c1ccc2ccccc2c1)NC(Cc1cc(ccc1)C(=N)NO)CC(=O)N1CCC(C)CC1                                                     |
| C846 | CacoP | CacoP+ | 13             | C1Cc2c(ccc(c2)Cl)C(=C2CC[NH2+])CC2)c2c1ccn2                                                                        |
| C847 | CacoP | CacoP+ | 13             | O=C(c1ncc(nc1)C)NCCc1ccc(cc1)S(=O)(=O)[N-]C(=O)NC1CCCCC1                                                           |
| C848 | CacoP | CacoP+ | 13             | Clc1cccc1C[NH+]1CCc2c(ccs2)C1CCC1(CC(=O)[O-])                                                                      |
| C849 | CacoP | CacoP+ | 13             | ]OCC=C2c3c(c(ccc3)CC)NC12                                                                                          |
| C850 | CacoP | CacoP+ | 13             | CCCC1O[C@@H]2[C@H]3[C@@H]4CCC5=CC(=O)C=C[C@@]5([C@H]4[C@H](C[C@@]3([C@@]2(O1)C(=O)CO)C)O)C                         |
| C851 | CacoP | CacoP+ | 13             | O=C(N(C)C)C(c1cccc1)(c1cccc1)CC[NH+]1CCC(O)(c2ccc(cc2)Cl)CC1                                                       |
| C852 | CacoP | CacoP+ | 13             | O=C(OC1C(=O)N(C)c2ccc(cc2C(=N1)c1cccc1)Cl)N(C)C                                                                    |
| C853 | CacoP | CacoP+ | 13             | Oc1c(c(nc1)CO)CO                                                                                                   |
| C854 | CacoP | CacoP+ | 13             | C[NH+]1C[C@H]2[C@@H](c3c(ccc(c3)Cl)Oe3ccccc23)C1                                                                   |
| C855 | CacoP | CacoP+ | 13             | Cc1ncc(cc1)c1ncc(cc1c1ccc(cc1)S(=O)(=O)C)Cl                                                                        |
| C856 | CacoP | CacoP+ | 10             | Cn1c2c([nH]en2)c(=O)n(C)c1=O                                                                                       |
| C857 | CacoP | CacoP+ | 13             | O=c1cc2oe3c(ccc(c3)O)c(c2cc1)c1cccc1C(=O)[O-]                                                                      |
| C858 | CacoP | CacoP+ | 13             | O=C(OC)Nc1nc2ccccc2[nH]1                                                                                           |
| C859 | CacoP | CacoP+ | 13             | Cc1ccncc1                                                                                                          |
| C860 | CacoP | CacoP+ | 13             | O=C(NCC1CC[NH+](CC2CCOCC2)CC1)[C@@H](Cc1cccc1)NC(=O)C1(CCCC1)NC(=O)c1cc2ccc(cc2s1)C(F)(F)F                         |
| C861 | CacoP | CacoP+ | 13             | O=C(CCCCCNC(=O)CS)Nc1c2ncccc2cc1                                                                                   |
| C862 | CacoP | CacoP+ | 13             | O=C([C@@H](NC(=O)N1CCOCC1)C(C)C)N1[C@H](C(=O)NC(C)C)C(=O)C(F)(F)C(F)(F)C)CCC1                                      |
| C863 | CacoP | CacoP+ | 13             | CC(CN1c2c(cccc2)Sc2c1cccc2)[NH+](C)C                                                                               |
| C864 | CacoP | CacoP+ | 13             | O=C1N(c2ccccc2)c2c(cccc2)C1(Cc1ccncc1)Cc1ccncc1                                                                    |
| C865 | CacoP | CacoP+ | 12             | [O-]C(=O)CCC(=O)O[C@H]1O[C@@H]2OC3(OO[C@@]42[C@@H](CC[C@@H](C)[C@@H]4CC3)[C@H]1)C                                  |
| C866 | CacoP | CacoP+ | 13             | Fe1c(ccc(c1)N1C[C@H](CNC(=S)N)OC1=O)N1CCOCC1                                                                       |
| C867 | CacoP | CacoP+ | 13             | Cc1nc(c(c1OC)C)CS(=O)c1nc2c([nH]1)cc(cc2)OC                                                                        |
| C868 | CacoP | CacoP+ | 13             | Fe1cc(ccc1C1CCS(=O)CC1)N1C[C@H](CNC(=O)CC)OC1=O                                                                    |
| C869 | CacoP | CacoP+ | 13             | Oc1cc(ccc1[C@@H]1COe2c3c(ccc2C1)OC(C=C3)(C)C)O                                                                     |
| C870 | CacoP | CacoP+ | 13             | COc1c(cc2c(c1)[C@@]13CC[N+](4([O-])[C@@H]1C[C@H]1[C@H]5[C@H]3N2C(=O)C[C@H]5OCC=C1C4)OC                             |
| C871 | CacoP | CacoP+ | 13             | O=C(N)c1cccc(c1)Cc1nc(c([nH]1)c1nc(ccc1)C)c1cc2nccnc2cc1                                                           |
| C872 | CacoP | CacoP+ | 13             | Cn1c(nc2ncc(cc12)c1cccc1)N                                                                                         |

|      |       |        |          |                                                                                                                                                      |
|------|-------|--------|----------|------------------------------------------------------------------------------------------------------------------------------------------------------|
| C873 | CacoP | CacoP+ | 13       | <chem>Cc1c(c(ccc1)C)OCC(=O)N[C@@H](Cc1ccccc1)[C@H](C[C@H](Cc1ccccc1)NC(=O)[C@H](C(C)C)N1CCCNC1=O)O</chem>                                            |
| C874 | CacoP | CacoP+ | 13       | <chem>O=C([O-])c1ccc(cc1)c1cc2ccnc2c(n1)c1cc2nonc2cc1</chem>                                                                                         |
| C875 | CacoP | CacoP+ | 13       | <chem>O=C([C@H](NC(=O)[C@H]1CCC(=O)N1)Cc1c[nH]cn1)N1[C@H](CCC1)C(=O)NC1[C@@H]([C@H]([C@@H]([C@@H](C(=O)N)O1)O)O)O</chem>                             |
| C876 | CacoP | CacoP+ | 13       | <chem>CS(=O)(=O)Nc1ccc(cc1)C(O)C[NH2+]C(C)C</chem>                                                                                                   |
| C877 | CacoP | CacoP+ | 13       | <chem>O=C1Nc2ccc(cc2C(=NC1)c1ncccc1)Br</chem>                                                                                                        |
| C878 | CacoP | CacoP+ | 12       | <chem>CC/C(=C(\c1ccccc1)/c1ccc(cc1)OCC[NH+](C)C)/c1ccccc1</chem>                                                                                     |
| C879 | CacoP | CacoP+ | 13       | <chem>O=C(Nc1ccc2c(c1)NCC2(C)C)c1ccccc1Nc1ccccc1</chem>                                                                                              |
| C880 | CacoP | CacoP+ | 13       | <chem>O=S(=O)(c1ccc(cc1)N)Nc1c(c(no1)C)C</chem>                                                                                                      |
| C881 | CacoP | CacoP+ | 12,8,2   | <chem>OC[C@@H](NC(=O)C(C)C)[C@H](O)c1ccc(cc1)[N+](=O)[O-]</chem>                                                                                     |
| C882 | CacoP | CacoP+ | 13       | <chem>Cc1c(c(ccc1)C)OCC(=O)N[C@@H](Cc1ccccc1)[C@@H](OC(=O)[C@H](C(C)C)NC(=O)[C@H](C(C)C)[NH3+])C[C@@H](Cc1ccccc1)NC(=O)[C@H](C(C)C)N1CCCNC1=O</chem> |
| C883 | CacoP | CacoP+ | 13       | <chem>O=C([O-])C1=CC(C(C(O)C)C(O)CO)OC(=O)C(COC)NC(=O)C(C(C)C)C[NH3+])NC(=O)C)N=C(N)N</chem>                                                         |
| C884 | CacoP | CacoP+ | 13       | <chem>OCc1ccccc1</chem>                                                                                                                              |
| C885 | CacoP | CacoP+ | 11,4,8,2 | <chem>CC(=O)Oc1c(cccc1)C(=O)[O-]</chem>                                                                                                              |
| C886 | CacoP | CacoP+ | 13       | <chem>O[C@](C[NH+](Cc1ccc(cc1)Br)NC(=O)[C@@H](C(C)C)C)CC(=O)OC)(Cc1ccccc1)C(=O)NC1CCOC1</chem>                                                       |
| C887 | CacoP | CacoP+ | 10,11    | <chem>CC(C)(C)[NH2+]CC(O)COc1ccc2c1CC(O)C(O)C2</chem>                                                                                                |
| C888 | CacoP | CacoP+ | 13       | <chem>Cc1cc(no1)N/C(=C/1\C(=O)c2ccccc2S(=O)(=O)N1C)/O</chem>                                                                                         |
| C889 | CacoP | CacoP+ | 13       | <chem>O=C(N1CCCC1)CCC[NH+]1CCC(=C(c2ccc(cc2)F)CC1</chem>                                                                                             |
| C890 | CacoP | CacoP+ | 10       | <chem>CCOC(=O)C(CCCc1ccccc1)[NH2+]C(C)C(=O)N1CCCC1C(=O)[O-]</chem>                                                                                   |
| C891 | CacoP | CacoP+ | 13       | <chem>c1(ccncc1)c1ccccc1</chem>                                                                                                                      |
| C892 | CacoP | CacoP+ | 13       | <chem>CC(C)CN(C[C@@H]([C@@H](Cc1ccccc1)NC(=O)O[C@H]1CO[C@H]2[C@@H]1CCO2)O)S(=O)(=O)c1ccc(cc1)N</chem>                                                |
| C893 | CacoP | CacoP+ | 10       | <chem>CSc1ccc2c(c1)c(=C)n(cn2)/C=C/C(=O)[O-]</chem>                                                                                                  |
| C894 | CacoP | CacoP+ | 13       | <chem>O[C@](C[NH+](Cc1ccc(cc1)Br)NC(=O)[C@@H](C(C)C)C)CC(=O)OC)(Cc1ccccc1)C(=O)Nc1ccc(cc1)C)O</chem>                                                 |
| C895 | CacoP | CacoP+ | 12       | <chem>C[C@@H]1O[C@H](OC[C@H]1[NH3+])c1ccc(cc1)[N+](=O)[O-]</chem>                                                                                    |
| C896 | CacoP | CacoP+ | 13       | <chem>C[NH+](C)CCN(Cc1ccc(cc1)OC)c1ncccc1</chem>                                                                                                     |
| C897 | CacoP | CacoP+ | 12       | <chem>CC[C@]1(O)C(=O)OCc2c1cc1n(Cc3c1nc1ccccc1c3)[N+](=O)[O-]c2=O</chem>                                                                             |
| C898 | CacoP | CacoP+ | 13       | <chem>O=C(CCCCCC(=O)NO)Nc1ccccc1</chem>                                                                                                              |
| C899 | CacoP | CacoP+ | 12       | <chem>C[NH2+]CCC(Oc1ccc(cc1)C(F)(F)F)c1ccccc1</chem>                                                                                                 |
| C900 | CacoP | CacoP+ | 13       | <chem>O=C([O-])Cc1ccc2c1oc1c(ccc1C)C)c2=O</chem>                                                                                                     |
| C901 | CacoP | CacoP+ | 13       | <chem>O=C([O-])c1ccccc1Nc1ccccc1C)C</chem>                                                                                                           |
| C902 | CacoP | CacoP+ | 13       | <chem>Cn1ccc1CN(CCN(Cc1ccccc1)S(=O)(=O)c1ccccc1)c1ccc(cc1)C#N</chem>                                                                                 |
| C903 | CacoP | CacoP+ | 13       | <chem>Oc1ccccc1NC(=O)C</chem>                                                                                                                        |
| C904 | CacoP | CacoP+ | 13       | <chem>O=C([N-]S(=O)(=O)c1ccc(cc1OC)C)C(c1cc2c(cc1)OCO2)c1cn(c2c1ccc(c2)C(=O)OCC)C</chem>                                                             |
| C905 | CacoP | CacoP+ | 13       | <chem>O=C(NCCC(=O)N1CC[NH+](CC2CCOCC2)CC1)[C@@H](Cc1ccccc1)NC(=O)C1(CCCC1)NC(=O)c1cc2ccccc2s1</chem>                                                 |
| C906 | CacoP | CacoP+ | 13       | <chem>O=C([O-])/C=C/c1ccccc1</chem>                                                                                                                  |
| C907 | CacoP | CacoP+ | 13       | <chem>O=C(c1nccc1[NH2+]Cc1ccccc1)Nc1ccc(cc1)C(C)C)C</chem>                                                                                           |
| C908 | CacoP | CacoP+ | 13       | <chem>Nc1nc2ccc(cc2n1S(=O)(=O)NC(C)C)C(C(=O)N)c1c(ccc(c1)F)F</chem>                                                                                  |
| C909 | CacoP | CacoP+ | 13       | <chem>CC(=O)CCCCC(O)/C=C/C#C/C=C/C</chem>                                                                                                            |
| C910 | CacoP | CacoP+ | 13       | <chem>COc1cc(cc1OC)OC)C(=O)N1CC[C@@](c2ccc(c(c2)Cl)Cl)(CC[NH+]2CCC(C(=O)N)(c3ccccc3)CC2)C1</chem>                                                    |
| C911 | CacoP | CacoP+ | 13       | <chem>Oc1ccccc1</chem>                                                                                                                               |
| C912 | CacoP | CacoP+ | 13       | <chem>O[C@@H]1[C@H](O)C[C@]2(C(=O)C=C3C([C@@H](O)C[C@@]4(C)[C@@]3(O)CC[C@@H]4[C@@](C)(O)[C@H](O)CCC(C)C)[C@]2(C)C1)O</chem>                          |
| C913 | CacoP | CacoP+ | 13       | <chem>Fc1cc(cc(c1c1ccccc1)F)N1CC(CNC(=O)C)OC1=O</chem>                                                                                               |
| C914 | CacoP | CacoP+ | 13       | <chem>CC(=O)N[C@@H](Cc1ccccc1)C(=O)N</chem>                                                                                                          |
| C915 | CacoP | CacoP+ | 13       | <chem>CCOc1ccccc1OCC1C[NH2+]CCO1</chem>                                                                                                              |
| C916 | CacoP | CacoP+ | 13       | <chem>O=C1N(Cc2ccc3[nH]nc(c3c2)N)[C@@H](Cc2ccccc2)[C@@H](O)[C@@H](O)[C@@H](Cc2ccccc2)N1CCCC</chem>                                                   |
| C917 | CacoP | CacoP+ | 13       | <chem>O=C1Nc2c(cc(c2)Cl)C(=NC1O)c1c(cccc1)Cl</chem>                                                                                                  |
| C918 | CacoP | CacoP+ | 13       | <chem>Cc1nccc2c1[nH]c1c2ccccc1</chem>                                                                                                                |

|      |       |        |              |                                                                                                                                                                        |
|------|-------|--------|--------------|------------------------------------------------------------------------------------------------------------------------------------------------------------------------|
| C919 | CacoP | CacoP+ | 13           | Oc1cc2c(c(c1)O)C(=O)OCC(CCC(=O)CCC/C=C\2)C                                                                                                                             |
| C920 | CacoP | CacoP+ | 13           | O=C([O-])Cc1cc(c(n1C)C(=O)c1ccc(cc1)Cl)C                                                                                                                               |
| C921 | CacoP | CacoP+ | 13           | CCC(C)(C(=O)O)[C@@H]1C[C@@H](C=C2C=C[C@H]([C@H]([C@H]12)CC[C@@H]1C[C@@H](CC(=O)O1)O)C)C                                                                                |
| C922 | CacoP | CacoP+ | 13           | Clc1ccc(c(c1)F)C[C@@H](C)C(=O)N1CCN(c2c(cc(cc2)C)[C@@H]([NH2+])CCNC)C(C)C)CC1                                                                                          |
| C923 | CacoP | CacoP+ | 13           | O=c1c2c(cccc2)nc2n1CCc1c2[nH]e2c1cccc2                                                                                                                                 |
| C924 | CacoP | CacoP+ | 12           | CCc1c2cc(ccc2nc2c1Cn1c2cc2c(COC(=O)[C@]2(O)CC)c1=O)O                                                                                                                   |
| C925 | CacoP | CacoP+ | 13           | O=C(c1cc(nn1c1cccc(c1)C[NH3+])C(F)(F)F)Nc1ccc(cc1)c1cccc1S(=O)(=O)C                                                                                                    |
| C926 | CacoP | CacoP+ | 13           | COe1c(e2c(c(cc(n2)n2ccc(n2)C(C)C)O[C@H]2[C@H]3C(=O)N(CCCC/C=C\C@H]4[C@@](NC(=O)[C@@H]3C2)(C(=O)[N-]S(=O)(=O)C2CC2)C4)C)cc1)C                                           |
| C927 | CacoP | CacoP+ | 13           | Clc1ccc(cc1)C[C@@H](C)C(=O)N1CCN(c2c(cccc2F)[C@@H](NC(=O)CC[NH+](C)C)C(C)C)CC1                                                                                         |
| C928 | CacoP | CacoP+ | 13           | CC1=C(CCC(=O)O)/C=C/c2c(c(c([nH]2)/C=C/2/C(=C(C)C(=O)N2)C=C)C)CCC(=O)[O-]/N=C1/C=C/1\C(=C(C=C)C(=O)N1)C                                                                |
| C929 | CacoP | CacoP+ | 13           | O=Cc1c(nc(n1Cc1ccc(cc1)c1cccc1c1nn[n-]1)CCC)CC                                                                                                                         |
| C930 | CacoP | CacoP+ | 13           | O[C@@H]([C@@H](O)CC(C)C)[C@@H](NC(=O)C[NH3+])CC1CCCC1                                                                                                                  |
| C931 | CacoP | CacoP+ | 13           | O=S(=O)(N(CC1CCN(C(=O)OCC(C)C)CC1)C1CN(Cc2cncn2C)c2ccc(cc2C1)C#N)c1ncccc1                                                                                              |
| C932 | CacoP | CacoP+ | 13           | O=C1CC([NH+])2CC[NH+](CCCN3c4cccc4Sc4c3cc(cc4)CC(=O)[O-])CC2)N(C)C(=O)N1C                                                                                              |
| C933 | CacoP | CacoP+ | 10,6,2       | COc1ccc(cc1OC)CC[NH+](C)CCCC(C#N)(C(C)C)c1ccc(c(c1)OC)OC                                                                                                               |
| C934 | CacoP | CacoP+ | 13           | Ne1n(c2c(n1)ccc(c2)/C=C/C(=O)NC)/c1cccc(c1)F)S(=O)(=O)[N-]C(=O)N1CCCC1                                                                                                 |
| C935 | CacoP | CacoP+ | 13           | c1cc(c(c1)Cl)/C=N/N=C(N)N)Cl                                                                                                                                           |
| C936 | CacoP | CacoP+ | 13           | CC/C=C(\C(=O)N)[C@@H]1[C@H]2N(C(=C(COC(=O)N)CS2)C(=O)OCOC(=O)C(C)(C)C)C1=O)/c1csc(n1)N                                                                                 |
| C937 | CacoP | CacoP+ | 12,5         | [nH]1c2c(n(nc2CC)C)c(=O)nc1c1c(ccc(c1)S(=O)(=O)N1CC[NH+](C)CC1)OCC                                                                                                     |
| C938 | CacoP | CacoP+ | 13           | O=C1C(c2cccc2)(c2cccc2)C(=O)N(COC)C(=O)N1                                                                                                                              |
| C939 | CacoP | CacoP+ | 13           | O=C(c1cenn1CCc1cnccl)Nc1ccc(cc1)Cl                                                                                                                                     |
| C940 | CacoP | CacoP+ | 13           | O=C1CC(c2ccc(cc2)O)Oe2c1c(cc(c2CC=C(C)C)O)O                                                                                                                            |
| C941 | CacoP | CacoP+ | 13           | Cc1nnc2n1c1c(cc(cc1)Cl)C(=NC2)c1cccc1                                                                                                                                  |
| C942 | CacoP | CacoP+ | 13           | C[C@]12CC[C@H]3[C@H]([C@@H]1CC[C@]2(C#C)O)CCc1c3ccc(c1)O                                                                                                               |
| C943 | CacoP | CacoP+ | 12           | CC[C@]1(O)[C@H]2CN(C1)CCc1c([nH]3cccc13)[C@@](C2)(C(=O)OC)c1c(cc2c(c1)[C@]13[C@@H](N2C)[C@@]2[C@@]4(C=CC[NH+](CC1)[C@H]34)CC)OC(=O)N(CCC1)C2=O)OC                      |
| C944 | CacoP | CacoP+ | 13           | O=C(CNC(=O)C)NCCc1cccc1                                                                                                                                                |
| C945 | CacoP | CacoP+ | 10,11,12,8   | Clc1cccc(c1N=C1NCCN1)Cl                                                                                                                                                |
| C946 | CacoP | CacoP+ | 12           | COe1c(cc2c(c1)oc(=O)cc2)[C@@H](O)[C@H](OC(=O)/C=C/C)C(C)C)O                                                                                                            |
| C947 | CacoP | CacoP+ | 13           | O[C@@H]1[C@H](COC(=O)[C@H](C(C)C)[NH3+])O[C@H]([C@H]1O)n1c(=O)nc(O)cc1                                                                                                 |
| C948 | CacoP | CacoP+ | 10,11        | COc1cc(c(c2c1C(=O)C1(O2)C(C)CC(=O)C=C1OC)Cl)OC                                                                                                                         |
| C949 | CacoP | CacoP+ | 13           | O=C(NC)[C@@H](NC(=O)[C@@H](CC1CCCC1)NC(=O)C)Cc1cccc1                                                                                                                   |
| C950 | CacoP | CacoP+ | 13           | c1c(c(=O)[nH]c(=O)n1[C@H]1[C@H]([C@@H]([C@H](O1)CO)O)O)/C=C/Br                                                                                                         |
| C951 | CacoP | CacoP+ | 13           | CC(c1cccc(c1)O)c1cccc1C(=O)[O-]                                                                                                                                        |
| C952 | CacoP | CacoP+ | 13           | CCCCCCCCC(=O)[O-]                                                                                                                                                      |
| C953 | CacoP | CacoP+ | 10,11,12,4,2 | Cc1cn([C@H]2C[C@H](N=[N+]=[N-])[C@@H](CO)O2)c(=O)[nH]c1=O                                                                                                              |
| C954 | CacoP | CacoP+ | 12           | cc[C@H]1OC(=O)[C@H](C)C(O)[C@H]2C[C@@](C)OC[C@H](O)[C@H](O2)[C@H](C)C(O)[C@@H]2O[C@H](C)[C@@H]([C@H]2O)[NH+](C)C[C@](O)C[C@@H](C)C(=N)OCOCOC[C@H](C)[C@@H](O)[C@]1(C)O |
| C955 | CacoP | CacoP+ | 13           | O=C1N[C@@]2[C[C@H]2/C=C/CCCCNC(=O)[C@H]2[C@H]1C[C@H](C2)Oc1nc(nc2c1ccc(c2C)OC)c1ccc(cc1)F)C(=O)[N-]S(=O)(=O)C1CC1                                                      |
| C956 | CacoP | CacoP+ | 13           | C[NH+](C)CCCN1c2c(cccc2)Se2ccc(cc12)Cl                                                                                                                                 |
| C957 | CacoP | CacoP+ | 12           | C/C=N/C[C@H]1CN(C(=O)O1)c1cc(c(cc1)c1nnc(s1)C[NH3+])F)/S                                                                                                               |
| C958 | CacoP | CacoP+ | 13           | O=S(=O)(c1ccc(cc1)N)Nc1ncccc1                                                                                                                                          |
| C959 | CacoP | CacoP+ | 13           | CC(=O)N(C)[C@@H](Cc1cccc1)C(=O)N(C)[C@H](Cc1cccc1)C(=O)N(C)C(Cc1cccc1)C(=O)NC                                                                                          |
| C960 | CacoP | CacoP+ | 10,8         | COe1c(cc2c(nc(nc2c1)N1CCN(CC1)C(=O)c1ccc1)N)OC                                                                                                                         |
| C961 | CacoP | CacoP+ | 13           | O=S(=O)([O-])CCNC(=O)CC[C@@H](C)[C@H]1CC[C@H]2[C@@H]3[C@H](O)CC4[C@H](O)CC[C@]4(C)[C@H]3C[C@H](O)[C@]12C                                                               |
| C962 | CacoP | CacoP+ | 13           | O=C(NCCC[NH+])1CCOCC1[C@@H](Cc1cccc1)NC(=O)C1(CCCC1)NC(=O)c1cc2cccc2cc1                                                                                                |
| C963 | CacoP | CacoP+ | 13           | O=C(c1cc2c([nH]c(n2)SC)cc1Cl)N1CCCC(C)CC1                                                                                                                              |
| C964 | CacoP | CacoP+ | 12           | C[NH+]1CCC[C@H]1c1cccc1                                                                                                                                                |

|       |       |        |       |                                                                                                                                                                       |
|-------|-------|--------|-------|-----------------------------------------------------------------------------------------------------------------------------------------------------------------------|
| C965  | CacoP | CacoP+ | 13    | CC1=NCCc2c1[nH]c1c2ccc(c1)OC                                                                                                                                          |
| C966  | CacoP | CacoP+ | 13    | O=C1N2c3cccc3[C@@]34CC[NH+](C)CC5=CCO[C@@H](C1)[C@H]([C@@H]23)[C@@H]5CC4=O                                                                                            |
| C967  | CacoP | CacoP+ | 13    | O=c1oc2cccc2c(c1C(c1cccc1)CC(=O)C)O                                                                                                                                   |
| C968  | CacoP | CacoP+ | 13    | O=C([N-]S(=O)(=O)c1ccc(cc1OC)C)C(c1cc2c(cc1)OCO2)c1cn(c2c1ccc(c2)F)C                                                                                                  |
| C969  | CacoP | CacoP+ | 13    | C[NH+]1C2CC[C@@H]1C[C@H](OC(c1cc(ccc1)Cl)c1ccc(cc1)Cl)C2                                                                                                              |
| C970  | CacoP | CacoP+ | 10    | CC1CC2C3CCC4=CC(=O)C=CC4(C)C3(F)C(O)CC2(C)C1(O)C(=O)CO                                                                                                                |
| C971  | CacoP | CacoP+ | 13    | C[C@@H]1[C@H]2[C@@H]([C@H]3[C@@H](C(=O)C(=C([C@]3(C(=O)C2=C(c2c1cccc2O)O)O)O)C(=O)N)[NH+](C)C)O                                                                       |
| C972  | CacoP | CacoP+ | 12,2  | [C@@H]12CC[C@](O)(C(=O)CO)[C@@]1(C)CC(=O)[C@H]1[C@H]2CCC2=CC(=O)CC[C@]12C                                                                                             |
| C973  | CacoP | CacoP+ | 13    | O=C([O-])Cc1ccc(cc1)Cn1cnc2c1cccc2                                                                                                                                    |
| C974  | CacoP | CacoP+ | 13    | c[C@@H]1/C=C/C=C(C)\C(=O)NC2=C(O)c3c(c(c4c(c3C(=O)/C2=C\N[NH+]2CCN(C)CC2)C(=O)[C@](O)C=C/[C@@H](OC)[C@@H](C)[C@H](OC(=O)C)[C@H](C)[C@@H](O)[C@@H](C)[C@H]1O)(O)O4)C)O |
| C975  | CacoP | CacoP+ | 12    | COc1cc2c(cc1)N1C3C4C(CC1=O)OCC=C1C[NH+]5CCCC23C5CC41                                                                                                                  |
| C976  | CacoP | CacoP+ | 13    | O[C@@](C[N@@H+](Cc1ccc(cc1)c1cccc1)NC(=O)[C@@H](C(C)C)C)CC(=O)OC)(Cc1cccc1)C(=O)N[C@H]1c2cccc2C[C@@H]1O                                                               |
| C977  | CacoP | CacoP+ | 12    | [NH3+][C@@H](Cc1cccc1)C(=O)[O-]                                                                                                                                       |
| C978  | CacoP | CacoP+ | 13    | O=C([O-])c1cn2[C@H](COc3c2c(cc(c3N2CC[NH+](CC2)C)F)c1=O)C                                                                                                             |
| C979  | CacoP | CacoP+ | 13    | C/C=C\C(=O)OC(C)([C@@H]1Cc2c(ccc3c2oc(=O)cc3)O1)C/C                                                                                                                   |
| C980  | CacoP | CacoP+ | 13    | CC(C)[NH2+]CC(OC(=O)C1CC1)COc1cccc1OCC=C                                                                                                                              |
| C981  | CacoP | CacoP+ | 13    | NC(=O)c1cccc(c1)Cn1cnc1                                                                                                                                               |
| C982  | CacoP | CacoP+ | 13    | O[C@@H]1[C@H](OC)C[C@H]2C(=O)C=C3C(CC[C@@]4(C)[C@@]3(O)CC[C@@H]4[C@@](C)(O)[C@H](OC)CCC(C)C)[C@]2(C)C1                                                                |
| C983  | CacoP | CacoP+ | 13    | Cc1nccc2c1[nH]c1c2ccc(c1)O                                                                                                                                            |
| C984  | CacoP | CacoP+ | 12,2  | Oc1cc2c(cc1)C[C@H]1[NH+](CC3(O)CC3)CC[C@]2(CC)C1(C)C                                                                                                                  |
| C985  | CacoP | CacoP+ | 13    | O=C(N[C@H]1CC[N@@H+](CC2CCOCC2)CC1)[C@@H](Cc1cccc1)NC(=O)C1(CCCC1)NC(=O)c1cc2cccc2s1                                                                                  |
| C986  | CacoP | CacoP+ | 13    | O=C(Nc1cccc(c1)OCC)OCC[NH+]1CCCC1                                                                                                                                     |
| C987  | CacoP | CacoP+ | 10,11 | CC(C)(C)[NH2+]CC(O)COc1nsnc1N1CCOCC1                                                                                                                                  |
| C988  | CacoP | CacoP+ | 13    | O=C(OC1C[C@@H]2[NH+](C)[C@H](CC2)C1)C(c1cccc1)CO                                                                                                                      |
| C989  | CacoP | CacoP+ | 13    | Nc1nc2c(cc(c2)/C(=C/C(=O)N)/c2ccc(cc2)F)n1S(=O)(=O)C(C)C                                                                                                              |
| C990  | CacoP | CacoP+ | 13    | O=c1c2c(cc(cc2O)oc(c1)c1cc(c(c1)OC)OC)OC                                                                                                                              |
| C991  | CacoP | CacoP+ | 12    | CO/N=C(N)\c1ccc(cc1)c1ccc(o1)c1ccc(cc1)/C(=N/OC)/N                                                                                                                    |
| C992  | CacoP | CacoP+ | 12    | COc1cc(ccc1)[C@@]1(O)CCCC[C@@H]1C[NH+](C)C                                                                                                                            |
| C993  | CacoP | CacoP+ | 13    | Oc1ccc(cc1)C(=O)OCCCCCCC                                                                                                                                              |
| C994  | CacoP | CacoP+ | 10    | CC12CCC3C(CCC4=CC(=O)CCC34C)C1CCC2O                                                                                                                                   |
| C995  | CacoP | CacoP+ | 13    | C=CCc1cccc1OCC(O)C[NH2+]C(C)C                                                                                                                                         |
| C996  | CacoP | CacoP+ | 13    | CCCCCCCCC(=O)Nc1cnc1                                                                                                                                                  |
| C997  | CacoP | CacoP+ | 13    | O=C([C@@H](C)NC(=O)C)NCCc1cccc1                                                                                                                                       |
| C998  | CacoP | CacoP+ | 13    | O=C([O-])c1cc2c(cc1)Sc1c(ccc1)N2CCC[NH+]1CC[NH+](c2cc(=O)n(C)c(=O)n2C)CCC1                                                                                            |
| C999  | CacoP | CacoP+ | 13    | O=C1c2c(cc(cc2OC(c2cc(c(cc2)OC)O)C1)O)O                                                                                                                               |
| C1000 | CacoP | CacoP+ | 13    | [NH3+]Cc1cccc(c1)Cc1nccn1                                                                                                                                             |
| C1001 | CacoP | CacoP+ | 13    | CCCCCCCCC(=O)OCc1cccc1                                                                                                                                                |
| C1002 | CacoP | CacoP+ | 12    | O[C@H]1CC[C@H]2C[NH+]3CCc4c([nH]c5cccc45)[C@@H]3C[C@@H]2[C@H]1C(=O)OC                                                                                                 |
| C1003 | CacoP | CacoP+ | 13    | O=c1[nH]c(=O)n(cc1F)[C@H]1O[C@@H](COC(=O)CNC(=O)C(Cc2cccc2)[NH3+])[C@H](O)C1                                                                                          |
| C1004 | CacoP | CacoP+ | 13    | Nc1nc2ccc(cc2n1C(C)C)C(C(=O)N)c1cccc(c1F)F                                                                                                                            |
| C1005 | CacoP | CacoP+ | 13    | CCCCCCCCC(=O)Oc1cc(ccc1)F                                                                                                                                             |
| C1006 | CacoP | CacoP+ | 13    | Nc1nc2ccc(cc2n1S(=O)(=O)C(C)C)/C(=C/C(=O)NC)/c1ccc(c(c1F)F)F                                                                                                          |
| C1007 | CacoP | CacoP+ | 13    | O=C1C[C@@H]([N@H+]2CCC[N@@H+](CCCN3c4c(ccc(c4)CC(=O)[O-])CCc4c3cccc4)CC2)N(C)C(=O)N1C                                                                                 |
| C1008 | CacoP | CacoP+ | 13    | C[C@H]1C[C@H]2[C@@H]3CC[C@@](C(=O)CO)(O)[C@@]3(C)C[C@H](O)[C@@H]2[C@]2(C)C1=CC(=O)C=C2                                                                                |
| C1009 | CacoP | CacoP+ | 13    | O[C@@H]1[C@H](O)C[C@H]2C(=O)C=C3C(CC[C@@]4(C)[C@@]3(O)CC[C@@H]4[C@@](C)(O)[C@H](OCC)CCC(C)(O)C)[C@]2(C)C1                                                             |
| C1010 | CacoP | CacoP+ | 13    | C[NH+]1CCC23C4C1Cc1c2c(cc1)OC)OC3C(C=C4)O                                                                                                                             |





|       |       |        |         |                                                                                                                                                                                      |
|-------|-------|--------|---------|--------------------------------------------------------------------------------------------------------------------------------------------------------------------------------------|
| C1057 | CacoP | CacoP- | 13      | [O-]C(=O)Cc1ccc(cc1)Cn1cnc1                                                                                                                                                          |
| C1058 | CacoP | CacoP- | 13      | O=S1(=O)c2c(cccc2)C(c2ccc(cc2)O)(c2ccc(cc2)O)O1                                                                                                                                      |
| C1059 | CacoP | CacoP- | 13      | Ce1c([nH]c(c1CCC(=O)O)Cc1c(c(c([nH]1)/C=C/1/C(=C)C(C(=O)N1)C=C)C)CCC(=O)[O-])/C=C\1/C(=C(C=C)C(=O)N1)C                                                                               |
| C1060 | CacoP | CacoP- | 13      | CC(C)c1nc(nc(c1/C=C/C(CC(CC(=O)[O-])O)O)c1ccc(cc1)F)N(C)S(=O)(=O)C                                                                                                                   |
| C1061 | CacoP | CacoP- | 13      | Fe1cc(ccc1N1CCS(=O)CC1)N1C[C@H](CNC(=O)C)OC1=O                                                                                                                                       |
| C1062 | CacoP | CacoP- | 13      | CS(=O)(=O)Nc1cc2c(cc1)N/C(=C\1/C(=O)[C@@H]3[C@H]4CC[C@H](C4)[C@@H]3N(C1=O)Cc1ccc(cc1)F)/NS2(=O)=O                                                                                    |
| C1063 | CacoP | CacoP- | 13      | c1ccc(cc1)CC1Nc2c(cc(c2)C(F)(F)F)S(=O)(=O)N)S(=O)(=O)N1                                                                                                                              |
| C1064 | CacoP | CacoP- | 10,12,5 | CC[NH+]1CCCC1CNC(=O)c1c(ccc(c1)S(=O)(=O)N)OC                                                                                                                                         |
| C1065 | CacoP | CacoP- | 13      | Ne1nenc2e1n2[C@H]1[C@@H](O)[C@H](O)[C@@H](CO)O1                                                                                                                                      |
| C1066 | CacoP | CacoP- | 13      | O=C(C1=C(CS[C@@H]2N1C(=O)[C@H]2NC(=O)C(NC(=O)N1C(=O)C(=O)N(CC)CC1)c1ccc(cc1)O)CSc1nmmn1CC)[O-]                                                                                       |
| C1067 | CacoP | CacoP- | 13      | Oc1cc(cc(c1O)O)C(=O)OCCC                                                                                                                                                             |
| C1068 | CacoP | CacoP- | 13      | CC(C)(C)NC(=O)[C@H]1C[C@H]2CCCC[C@@H]2[C@@H]1C[C@H](C(C)[C@@H](C1)N(=O)[C@@H](CC(=O)N)N(=O)c1nc2ccccc2cc1)O                                                                          |
| C1069 | CacoP | CacoP- | 13      | o=c1(c@@H)CSSCC(=O)N[C@@H](C2ccc(cc2)O)C(=O)N[C@@H](C2ccc(c2)C(=O)N[C@@H](CCC(=O)N)C(=O)N1)[C@H](C(=O)N)C(=O)NCCC(=O)N)CCCN=C(N)N)CCCC1                                              |
| C1070 | CacoP | CacoP- | 13      | N=c1ccc2c(c3ccccc3C(=O)OC)c3c(cc(cc3)N)oc2c1                                                                                                                                         |
| C1071 | CacoP | CacoP- | 13      | O=c1c(c(Cc2ccccc2O)n(CCO)cc1)O                                                                                                                                                       |
| C1072 | CacoP | CacoP- | 13      | O=C1OC[C@H](Cc2cc3c([nH]cc3CC[NH+](C)C)cc2)N1                                                                                                                                        |
| C1073 | CacoP | CacoP- | 13      | O=C([C@H](OCc1ccccc1)[C@H](O)[C@@H](O)[C@@H](OCc1ccccc1)C(=O)N[C@@H](C)C)C(=O)N)N[C@@H]1[C@H](O)Cc2c1cccc2                                                                           |
| C1074 | CacoP | CacoP- | 12,7    | Ce1cnc2c1nc([nH]2)Cc1nc2c([nH]1)cc(cc2)/C(=N/O)/N                                                                                                                                    |
| C1075 | CacoP | CacoP- | 13      | Cn1cnc1CN(CCN(CC1CCN(C(=O)OC(C)C)CC1)S(=O)(=O)c1cn(en1)C)c1ccc(cc1)C#N                                                                                                               |
| C1076 | CacoP | CacoP- | 13      | O=C1OC[C@@H]2[C@H](O[C@H]3[C@H](O)[C@@H](O)[C@@H]4O[C@H](C)OC[C@H]4O3)c3c(cc4c(c3)OCO4)[C@H](C(C)[C@@H]12)c1cc(c(c1)OC)O)OC                                                          |
| C1077 | CacoP | CacoP- | 13      | O=C(OC(C)O)N1[C@H](C(=O)N[C@@H](C2ccc(c2)C(=O)N([C@@H](C2c[nH]n2)C(=O)N[C@@H](C(C)[C@@H](O)C)C)C(=O)N[C@@H](C(C)C)C(=O)N)C2cccc2)CC(C)C)CCCC1                                        |
| C1078 | CacoP | CacoP- | 13      | O=C(c1cc(nn1c1cccc(c1)C(=N)N)C(F)(F)F)Nc1c(cc(c1)C)1ccccc1S(=O)(=O)C)F                                                                                                               |
| C1079 | CacoP | CacoP- | 13      | C[NH+]1C(CNc2ccc(cc2)C(=O)N[C@H](C(=O)[O-])CCC(=O)[O-])CNe2c1c(=O)nc(N)[nH]2                                                                                                         |
| C1080 | CacoP | CacoP- | 13      | O=C(C1=C(CS[C@@H]2N1C(=O)[C@]2(NC(=O)Cc1ccs1)OC)COC(=O)N)[O-]                                                                                                                        |
| C1081 | CacoP | CacoP- | 13      | O[C@@H]1[C@H](COC(=O)[C@H](C2ccc(c2)[NH3+])O[C@H]([C@H]1O)n1c(=O)nc(O)cc1                                                                                                            |
| C1082 | CacoP | CacoP- | 13      | NC(=N)c1ccc2c(c1)[nH]c(n2)c1cccc1                                                                                                                                                    |
| C1083 | CacoP | CacoP- | 13      | O=c1[nH]c(=O)n(cc1F)[C@H]1O[C@@H](COC(=O)[C@H]([C@@H](C)CC)N)[C@H](OC(=O)[C@H]([C@@H](C)CC)[NH3+])C1                                                                                 |
| C1084 | CacoP | CacoP- | 10      | C[C@@H]1O[C@@H](O[C@H]2CC[C@]3(C)[C@H]4CC[C@]5(C)[C@H](CC[C@]5(O)[C@@H]4CCC3=C2)c2coc(=O)cc2)[C@H](O)[C@H](O)[C@H]1O                                                                 |
| C1085 | CacoP | CacoP- | 13      | CCNC(=O)[C@H]1CCCNC(=O)[C@@H](NC(=O)[C@@H](NC(=O)[C@@H](NC(=O)[C@@H](NC(=O)[C@@H](NC(=O)[C@@H](NC(=O)[C@H]1CCC(=O)N1)Cc1nc[nH]1)Cc1c[nH]e2ccccc12)CO)C1ccc(cc1)O)CC(C)C)C)CCCN=C(N)N |
| C1086 | CacoP | CacoP- | 12      | NC(=N)c1ccc(cc1)CNC(=O)[C@@H]1CCN1C(=O)[C@H]([NH2+])CC(=O)[O-])C1CCCCC1                                                                                                              |
| C1087 | CacoP | CacoP- | 13      | O=S(=O)(c1ccc(cc1)C([NH+])1CCN(C2CCC2)CCC1)c1nmmn1Cc1ccccc1)C                                                                                                                        |
| C1088 | CacoP | CacoP- | 13      | O=c1c2c(n(en2)COC(CO)CO)nc(N)[nH]1                                                                                                                                                   |
| C1089 | CacoP | CacoP- | 13      | O=C([O-])C(NC(=O)c1ccc(cc1)C)C1Cc1cc(=O)[nH]c2c1ccccc2                                                                                                                               |
| C1090 | CacoP | CacoP- | 13      | COc1cc2c(c(cc2n2)c2csc(n2)NC(C)O)[C@H]2[C@H]3C(=O)N(CCCC/C=C[C@H]4[C@@](NC(=O)[C@@H]3C2)(C(=O)[N-]S(=O)(=O)C2CC2)C4)C)cc1                                                            |
| C1091 | CacoP | CacoP- | 13      | O=C([O-])c1c(nc(n1Cc1ccc(cc1)c1ccccc1c1nmmn1)1)CCCCC1                                                                                                                                |
| C1092 | CacoP | CacoP- | 12      | CCOC(=O)[C@H](CCc1ccccc1)[NH2+][C@@H](C)C(=O)N1CCC[C@H]1C(=O)[O-]                                                                                                                    |
| C1093 | CacoP | CacoP- | 13      | [O-]C(=O)[C@H](NC(=O)C(C)C)[NH3+])C(C)C                                                                                                                                              |
| C1094 | CacoP | CacoP- | 12      | [O-]C(=O)C[C@H](NC(=O)[C@@H]1CCCN(C1)C(=O)CCCC1CC[NH2+][CC1)c1cccc1                                                                                                                  |
| C1095 | CacoP | CacoP- | 13      | O=S(=O)(N(CCN1cccc1)C1CN(Cc2en2)C)c2ccc(cc2C1)C#N)c1cn(en1)C                                                                                                                         |
| C1096 | CacoP | CacoP- | 13      | O=C([C@H]1[N@H+]([C@@H](O)[C@@H](O)[C@@H](NC(=O)c2ccccc2)O)CSc2ccccc2)C[C@H]2CCCC[C@@H]2C1)N(C)C)C O=C([O-                                                                           |
| C1097 | CacoP | CacoP- | 13      | ][C@@H](NC(=O)c1ccc(cc1)N(Cc1nc2c(nc(nc2nc1)N)N)C)CCC(=O)O CC(C)[C@H]([NH3+])C(=O)OCCOCn1cnc2c1[nH]c(nc2=O)N                                                                         |
| C1098 | CacoP | CacoP- | 13      | [NH3+][C@@H](C(=O)N[C@H]1[C@H]2SCC(=C(N2C1=O)C(=O)[O-])CSc1n[nH]nc1)c1ccc(cc1)O                                                                                                      |
| C1099 | CacoP | CacoP- | 12      | C1c1c(c(cc1)C)C(=O)N[C@@H](Cc1ccc(cc1)c1c(c2ccc(cc2)F)enn(C)c1=O)C(=O)[O-]                                                                                                           |
| C1100 | CacoP | CacoP- | 13      | O=c1cc([NH2+])CCC[NH+]2CCC(CN3c4ccccc4Sc4c3cc(cc4)C(=O)[O-])CC2)n(C)c(=O)n1C                                                                                                         |
| C1101 | CacoP | CacoP- | 13      | CCOC1nc2ccccc2n1Cc1ccc(cc1)c1ccccc1c1n[nH]nn1)C(=O)[O-]                                                                                                                              |
| C1102 | CacoP | CacoP- | 13      |                                                                                                                                                                                      |





|       |       |        |        |                                                                                                                                                               |
|-------|-------|--------|--------|---------------------------------------------------------------------------------------------------------------------------------------------------------------|
| C1195 | CacoP | CacoP+ | 13     | O=C(C[NH3+])CCC(=O)[O-]                                                                                                                                       |
| C1196 | CacoP | CacoP+ | 13     | CCCCOe1cc2c(cc1)[C@H](c1ccc3c(c1)OCO3)[C@@H](C(=O)[O-])[C@@H]2c1c(cc(cc1)OC)OCC(=O)O                                                                          |
| C1197 | CacoP | CacoP+ | 13     | CCC(=O)N(c1cccc1)C1(CC[NH+])(CC1)CCn1c(=O)n(nn1)CC)COC                                                                                                        |
| C1198 | CacoP | CacoP+ | 13     | CC1=C(N2[C@H](SC1)[C@@H](C2=O)NC(=O)C(c1cccc1)[NH3+])C(=O)[O-]                                                                                                |
| C1199 | CacoP | CacoP+ | 10,11  | CN1C(=C(O)c2c(cccc2)S1(=O)=O)C(=O)Nc1ncc(s1)C                                                                                                                 |
| C1200 | CacoP | CacoP+ | 13     | c[C@H]1/C=C/C(=O)N2=C3C(=NC4(N3)CC[NH+](CC4)CC(C)C)3c4c(c(c3C2=O)O)C)O[C@@](C4=O)(O/C=C/[C@H]([C@H]([C@H]([C@H]([C@H]([C@H]1O)C)O)C)OC(=O)C)OC)C)OC(=O)C)OC)C |
| C1201 | CacoP | CacoP+ | 13     | c1(ccccc1)Cn1c(nnn1)C([NH+])1CCN(C2CCC2)CCC1)c1ccc(cc1)n1cncn1                                                                                                |
| C1202 | CacoP | CacoP+ | 13     | OC[C@@H]1CC[C@H](n2cnc3c2nnc3O)O1                                                                                                                             |
| C1203 | CacoP | CacoP+ | 13     | [NH3+][C@@H](CCCCCCCC)C(=O)N[C@@H](Cc1ccc(cc1)O)C(=O)NCC(=O)NCC(=O)N[C@@H](Cc1cccc1)C(=O)N[C@@H](CC(C)C)C(=O)N                                                |
| C1204 | CacoP | CacoP+ | 12,2   | c1cn(cn1)C[C@@]1(OC[C@@H](O1)COc1ccc(cc1)N1CCN(C(=O)C)CC1)c1c(cc(cc1)Cl)Cl                                                                                    |
| C1205 | CacoP | CacoP+ | 13     | CC(=O)c1ccc(cc1)N1CC(CNC(=O)C)[NH+](C)S1=O                                                                                                                    |
| C1206 | CacoP | CacoP+ | 13     | CC1([C@@H](N2[C@H](S1)[C@@H](C2=O)NC(=O)C(c1cccc1)[NH3+])C(=O)OCOC(=O)C(C)C)C                                                                                 |
| C1207 | CacoP | CacoP+ | 13     | O[C@@H]1[C@@H](O)[C@@H](Cc2cccc2)N(Cc2cccc(c2)N)C(=O)N(Cc2cc(ccc2)N)[C@@H]1Cc1cccc1                                                                           |
| C1208 | CacoP | CacoP+ | 12,5,2 | CC1Nc2cc(c(cc2C(=O)N)c1c1ccc1)C(S(=O)(=O)N)Cl                                                                                                                 |
| C1209 | CacoP | CacoP+ | 13     | O=C(c1cenn1CCc1ccncc1)Nc1ccc(cc1)OC(F)(Cl)F                                                                                                                   |
| C1210 | CacoP | CacoP+ | 13     | [NH3+][C@H](CC(=O)OCc1cccc1)C(=O)NC(C(=O)[O-])C                                                                                                               |
| C1211 | CacoP | CacoP+ | 13     | CC[NH+]1CCCC1CNC(=O)c1cc(c(cc1OC)N)S(=O)(=O)CC                                                                                                                |
| C1212 | CacoP | CacoP+ | 13     | O=C1C(Cn2cnc2C)CCc2n(c3c(c12)cccc3)C                                                                                                                          |
| C1213 | CacoP | CacoP+ | 13     | Oc1cccc(c1)c1ncc(o1)c1ccc(cc1)O                                                                                                                               |
| C1214 | CacoP | CacoP+ | 13     | Oc1ccc(cc1)C(=O)OC                                                                                                                                            |
| C1215 | CacoP | CacoP+ | 13     | O=C([O-])CC[C@@H](NC(=O)c1ccc(c(c1)Cl)Cl)C(=O)N(CCCOC)CCCC                                                                                                    |
| C1216 | CacoP | CacoP+ | 13     | C[C@H]1CN(c2c(c3c(c(c2F)N)c(=O)c(n3C2CC2)C(=O)[O-])F)C[C@@H](C)[NH2+]1                                                                                        |
| C1217 | CacoP | CacoP+ | 13     | FC(c1cc(ccc1)C1=CC[NH+](CCc2ccc3cccc3c2)CC1)(F)F                                                                                                              |
| C1218 | CacoP | CacoP+ | 13     | O=C(c1nsec1[NH2+]Cc1c2cccc2ncc1)Nc1cccc(c1)Br                                                                                                                 |
| C1219 | CacoP | CacoP+ | 12,4   | Fc1c2c(ccc1)O[C@@H]1[C@@H]1(O2)C[NH2+]C1                                                                                                                      |
| C1220 | CacoP | CacoP+ | 13     | CC[C@H]1[C@@H]2[C@@H]([C@H](C)C(=O)O2)C2C3C1CCCC[NH+]3CC2                                                                                                     |
| C1221 | CacoP | CacoP+ | 13     | CCCCNC(=O)[N-]S(=O)(=O)c1ccc(cc1)C                                                                                                                            |
| C1222 | CacoP | CacoP+ | 13     | O=C1N([C@H](c2cc3cccc3nc2)CC(=O)[O-])CC[C@H]1CCCc1ccc2c(n1)NCCC2                                                                                              |
| C1223 | CacoP | CacoP+ | 13     | O=C(N(C)C(Cc1cc(c(cc1)O)C(C)C)C(=O)N)C(C(C)N(C)C(=O)[C@@H]([NH3+])Cc1cccc1                                                                                    |
| C1224 | CacoP | CacoP+ | 13     | O=CNc1cc(ccc1O)C(O)C[NH2+]C(C)Cc1ccc(cc1)OC                                                                                                                   |
| C1225 | CacoP | CacoP+ | 13     | NC(=NCC1COc2cccc2O1)N                                                                                                                                         |
| C1226 | CacoP | CacoP+ | 13     | O=C1N2c3cc(ccc3CCC2CO1)C(=O)C                                                                                                                                 |
| C1227 | CacoP | CacoP+ | 13     | O=C([O-])CC1=C(C)/C(=C/c2ccc(cc2)S(=O)C)/c2c1cc(cc2)F                                                                                                         |
| C1228 | CacoP | CacoP+ | 12     | C[C@]12CCC[C@](C)(C1CC[C@]13CC(=C)[C@](O)(C1)CCC23)C(=O)[O-]                                                                                                  |
| C1229 | CacoP | CacoP+ | 13     | [C@@H]12[C@]3(O)CCC(=O)[C@H]4[C@]3(CC[NH+]1CC=C)c1c(c(ccc1C2)O)O4                                                                                             |
| C1230 | CacoP | CacoP+ | 13     | [n+]12c(cc3ccc4c(c3c1)OCO4)c1cc3c(cc1CC2)OCO3                                                                                                                 |
| C1231 | CacoP | CacoP+ | 13     | O=C([O-])c1ccc(cc1OCC)CC(=O)N[C@H](c1cccc1N1CCCC1)CC(C)C                                                                                                      |
| C1232 | CacoP | CacoP+ | 13     | O=c1oe2c(ccc2)cc1                                                                                                                                             |
| C1233 | CacoP | CacoP+ | 13     | [O-]C(=O)c1cc2c(cc1)C(=O)OC12c2c(cc(cc2)O)Oc2c1ccc(c2)O                                                                                                       |
| C1234 | CacoP | CacoP+ | 13     | C[C@@]12CC[C@@H]3[C@H](CCC4=Cc5c(cno5)C[C@@]34C)[C@H]1CC[C@]2(O)C#C                                                                                           |
| C1235 | CacoP | CacoP+ | 13     | COc1c2c(c(c3c1ccc3)OCC1C(C)(O1)C)oc(=O)cc2                                                                                                                    |
| C1236 | CacoP | CacoP+ | 13     | C1CN(CC[NH+]1CC/C=C\1/c2cccc2Se2c1cc(cc2)C(F)(F)F)CCO                                                                                                         |
| C1237 | CacoP | CacoP+ | 13     | c1(ccccc1)C1(CCCCC1)[NH+]1CCCCC1                                                                                                                              |
| C1238 | CacoP | CacoP+ | 13     | COc1ccc(c2c1cccc2)CCCN1CC[NH+](C2CCCC2)CC1                                                                                                                    |
| C1239 | CacoP | CacoP+ | 13     | O=C([O-])C1=CC(C(C(O1)C(C(O)CO)OC1(C(C)C1)CNC(=O)C(C(C)C)[NH3+])NC(=O)C)N=C(N)N                                                                               |
| C1240 | CacoP | CacoP+ | 13     | [O-]C(=O)c1ccc(cc1)Cc1nccc1                                                                                                                                   |



|       |       |        |    |                                                                                                                                 |
|-------|-------|--------|----|---------------------------------------------------------------------------------------------------------------------------------|
| C1287 | CacoP | CacoP+ | 10 | CC(C)(C)[NH2+]C[C@@H](COc1nsnc1N1CCOCC1)OC(=C)C1CC1                                                                             |
| C1288 | CacoP | CacoP+ | 13 | OCC/C=C/c1ccc(c(c1)OC)OC                                                                                                        |
| C1289 | CacoP | CacoP+ | 13 | CC(C)[NH2+]CC(OC(=O)C1CC1)COc1cccc2cccc12                                                                                       |
| C1290 | CacoP | CacoP+ | 13 | O=c1n(C)c(=O)n(C)c(c1)C1=CC[NH+](CCCN2c3cccc3Sc3e2ce(cc3)CC(=O)[O-])CC1                                                         |
| C1291 | CacoP | CacoP+ | 13 | C[NH+]1CCN(CC1)c1c(cc2c(c1F)n(cc2=O)C(=O)[O-])CCF)F                                                                             |
| C1292 | CacoP | CacoP+ | 13 | CC(Cc1ccc(cc1)C(C(=O)[O-])C)C                                                                                                   |
| C1293 | CacoP | CacoP+ | 13 | O=C(NCCC[NH+]1CCOCC1)[C@@H](Cc1cccc1)NC(=O)C1(CCCC1)NC(=O)c1cc2cccc2o1                                                          |
| C1294 | CacoP | CacoP+ | 13 | O=c1c(ccc2c1ccc(c2)O)c1ccc(cc1)O                                                                                                |
| C1295 | CacoP | CacoP+ | 13 | O[C@@](C[N@@H+](Cc1ccc(cc1)Br)NC(=O)[C@@H](C(C)(C)C)CC(=O)OC)(Cc1cccc1)C(=O)N[C@@H](Cc1cccc1)C(=O)NC                            |
| C1296 | CacoP | CacoP+ | 13 | O=C(c1cccc1OCC(O)C[NH2+])CCC)CCc1cccc1                                                                                          |
| C1297 | CacoP | CacoP+ | 12 | COc1ccc2c(c1)[C@@]13[C@@H]([C@@H](C2)[NH+](CC1)C)CCCC3                                                                          |
| C1298 | CacoP | CacoP+ | 13 | O=C(NCC1CC[NH+](CC2CCOCC2)CC1)[C@@H](Cc1cccc1)NC(=O)C1(CCCC1)NC(=O)c1cc2ccc(cc2s1)N(CC)CC                                       |
| C1299 | CacoP | CacoP+ | 12 | CC(CCC(=O)NCC(=O)[O-])C1CCC2C3C(O)CC4CC(O)CCC4(C)C3CC(O)C12C                                                                    |
| C1300 | CacoP | CacoP+ | 13 | CC(=O)c1ccc(cc1)N1CC(C[NH3+])OC1=O                                                                                              |
| C1301 | CacoP | CacoP+ | 13 | COc1ccc(cc1OC)OC)C(=O)N1CC[C@@](c2ccc(c(c2)Cl)Cl)(CC[NH+]2CCC(C(=O)N3CCOCC3)(c3cccc3)CC2)C1                                     |
| C1302 | CacoP | CacoP+ | 13 | C[NH2+]CCCN1c2cccc2CCc2cccc12                                                                                                   |
| C1303 | CacoP | CacoP+ | 13 | O=c1[nH]c(=O)n(cc1F)[C@H]1O[C@@H](COC(=O)C(C)C)[NH3+][C@H](O)C1                                                                 |
| C1304 | CacoP | CacoP+ | 13 | O=C1CC[C@]2(C)[C@H]3CC[C@]4(C)[C@@H](C(=O)C)CC[C@H]4[C@@H]3CCC2=C1                                                              |
| C1305 | CacoP | CacoP+ | 13 | O=c1n(C)c(=O)n(C)c(c1)[NH+]1CC[NH+](CC1)CCCN1c2cccc2Se2c1cc(cc2)CCC(=O)[O-]                                                     |
| C1306 | CacoP | CacoP+ | 12 | O=C1C[C@@H]2OCC=C3C[NH+]4CC[C@@]56[C@@H]4C[C@@H]3[C@@H]2[C@@H]5N1c1cccc61                                                       |
| C1307 | CacoP | CacoP+ | 12 | C[NH+](C)[C@H]1[C@@H]2C[C@H]3C(=C(O)c4c(cccc4O)[C@@]3(C)O)C(=O)[C@]2(O)C(=O)/C(=C(N)\O)/C1=O                                    |
| C1308 | CacoP | CacoP+ | 13 | O=C1C(c2cccc2)(c2cccc2)C(=O)NC(=O)N1                                                                                            |
| C1309 | CacoP | CacoP+ | 13 | O[C@@H]([C@@H](O)CC(C)C)[C@@H](NC(=O)/C=C/c1cccc1)CC1CCCCC1                                                                     |
| C1310 | CacoP | CacoP+ | 13 | CCCCCCCCC(=O)NC1CCCCC1                                                                                                          |
| C1311 | CacoP | CacoP+ | 13 | O=C(c1cc2c([nH]c(n2)SC)cc1)N1CCCCC1                                                                                             |
| C1312 | CacoP | CacoP+ | 13 | Oc1c(ccc(c1)O)C(=O)/C=C/c1ccc(cc1)O                                                                                             |
| C1313 | CacoP | CacoP+ | 13 | O=c1cc(c2cccc2)oc2c1c(c(c(c2)O)O)O                                                                                              |
| C1314 | CacoP | CacoP+ | 13 | O=C1CC([NH+]2CCC[NH+](CC/C=C/3v4c(ccc(c4)C(=O)[O-])CCc4c3cccc4)CC2)N(C)C(=O)N1C                                                 |
| C1315 | CacoP | CacoP+ | 13 | Nc1nc2c(cc(cc2)/C(=C/C(=O)N)/c2cccc(c2F)F)n1C(C)C                                                                               |
| C1316 | CacoP | CacoP+ | 12 | Cc1c2[nH]c3cc(=O)ccc3c2cc[nH]1                                                                                                  |
| C1317 | CacoP | CacoP+ | 13 | CC(=O)N[C@@H](Cc1cccc1)C(=O)N[C@@H](Cc1cccc1)C(=O)N(C)C(Cc1cccc1)C(=O)N                                                         |
| C1318 | CacoP | CacoP+ | 13 | Nc1nc2ccc(cc2n1S(=O)(=O)[N-]C(=O)N1CCOCC1)/C(=C/C(=O)NC)/c1cccc(c1)F                                                            |
| C1319 | CacoP | CacoP+ | 13 | Oc1ccc(cc1)C(=O)OCCC                                                                                                            |
| C1320 | CacoP | CacoP+ | 13 | Oc1ccc(cc1)/C=C/c1ccc(cc1)O)O                                                                                                   |
| C1321 | CacoP | CacoP+ | 12 | CC[C@@]1(O)C(=O)OCc2c1cc1n(Cc3c(c4cccc4nc13)CC[NH2+]C(C)C)c2=O                                                                  |
| C1322 | CacoP | CacoP+ | 12 | CC(=CC(=O)O)[C@H]1Cc2c(cc3c(c2)ccc(=O)o3)OC1(C)C)C                                                                              |
| C1323 | CacoP | CacoP+ | 13 | O[C@H]1[C@@H](O)[C@@H](Cc2cccc2)N(Cc2ccc3[nH]nc(c3e2)N)C(=O)N(Cc2cccc2)[C@@H]1Cc1cccc1                                          |
| C1324 | CacoP | CacoP+ | 13 | O=C(NCCC[NH+]1CCOCC1)[C@@H](Cc1cccc1)NC(=O)C1(CCCC1)NC(=O)c1ccc(s1)c1cccc1                                                      |
| C1325 | CacoP | CacoP+ | 13 | N#Cc1cccc(c1)Cc1nccn1                                                                                                           |
| C1326 | CacoP | CacoP+ | 13 | O=C1C[C@@H]([N@@H+]2CC[N@@H+](CCCN3c4c(ccc(c4)C(=O)[O-])OCc4c3cccc4)CC2)N(C)C(=O)N1C                                            |
| C1327 | CacoP | CacoP+ | 13 | O=C([C@@H](CC(C)C)NC(=O)C)NCCc1cccc1                                                                                            |
| C1328 | CacoP | CacoP+ | 13 | COc1e(e2c(c(cc(n2)e2nc(cs2)C(C)C)O)[C@H]2C[C@H]3C(=O)N(CCCC/C=C/[C@H]4[C@@](NC(=O)[C@@H]3C2)(C(=O)[N-S(=O)(=O)C2CC2)C4)C)cc1)Cl |
| C1329 | CacoP | CacoP+ | 13 | Nc1cccc(c1)Cn1cnc2c1cccc2                                                                                                       |
| C1330 | CacoP | CacoP+ | 12 | C[C@@H]1O[C@H](OC[C@H]1)NC(=O)Cc1cccc1)c1ccc(cc1)Cl                                                                             |
| C1331 | CacoP | CacoP+ | 13 | CC(=O)CCCC/C=C/CC#C/C=C\C                                                                                                       |
| C1332 | CacoP | CacoP+ | 13 | O=C1CC([NH+]2CCC[NH+](CC/C=C/3v4c(ccc(c4)CC(=O)[O-])OCc4c3cccc4)CC2)N(C)C(=O)N1C                                                |

|       |       |        |    |                                                                                                                           |
|-------|-------|--------|----|---------------------------------------------------------------------------------------------------------------------------|
| C1333 | CacoP | CacoP+ | 13 | Fe1c(ccc(c1)N1C[C@H](CNC(=S)C)OC1=O)c1nnc(s1)[C@@H]1[NH2+]CCCC1                                                           |
| C1334 | CacoP | CacoP+ | 13 | CCCCCCCCC(=O)Nc1c(ccc(c1)C)C                                                                                              |
| C1335 | CacoP | CacoP+ | 13 | Oc1ccc2c3c1O[C@@H]1[C@@H]43CC[NH+][C@H](C2)[C@@H]4C=C[C@@H]1O)C                                                           |
| C1336 | CacoP | CacoP+ | 13 | CCCCCCC/C=C/C=C/C(=O)NCC(C)C                                                                                              |
| C1337 | CacoP | CacoP+ | 13 | O=c1cc(e2ccccc2)oc2c1c(cc(c2)OC)OC                                                                                        |
| C1338 | CacoP | CacoP+ | 13 | Fe1c(ccc(c1)N1C[C@H](CNC(=S)C2CC2)OC1=O)N1CCN(C(=O)CO)CC1                                                                 |
| C1339 | CacoP | CacoP+ | 13 | O=c1n(C)c(=O)n(C)c(e1)[NH+]1CC[NH+](CCC1)CCCN1c2ccccc2Sc2c1cc(cc2)C(C)(C)C(=O)[O-]                                        |
| C1340 | CacoP | CacoP+ | 13 | O=S(=O)(N(CC1CCN(C(=O)OCC)CC1)C1CN(Ce2cncn2C)c2ccc(cc2C1)C#N)c1ncccc1                                                     |
| C1341 | CacoP | CacoP+ | 13 | O=C(c1nsec1[NH2+])Cc1ccccc1)Nc1ccc(c(c1)C(F)(F)F)C                                                                        |
| C1342 | CacoP | CacoP+ | 13 | Clc1ccc(cc1)C[C@@H](C)C(=O)N1CCN(c2c(cc(cc2)C)[C@@H](NC(=O)CC[NH3+])C(C)C)CC1                                             |
| C1343 | CacoP | CacoP+ | 13 | O=c1[nH]c(=O)n(cc1F)[C@H]1O[C@@H](COC(=O)CNC(=O)C(C)C)[NH3+][C@H](O)C1                                                    |
| C1344 | CacoP | CacoP+ | 13 | Oc1cc2c(c(c1)O)C(=O)OCC(CCC(CCC/C=C\2)O)C                                                                                 |
| C1345 | CacoP | CacoP+ | 13 | COc1cc2c(c(cc(n2)c2ccccc2)O[C@H]2[C@H]3C(=O)N(CCCC/C=C\C[CH]4[C@@H](NC(=O)[C@@H]3C2)(C(=O)[N-]S(=O)(=O)C2CC2)C4)C)cc1     |
| C1346 | CacoP | CacoP+ | 10 | CC12CC(O)C3C(CCC4=CC(=O)CCC34C)C1CCC2C(=O)CO                                                                              |
| C1347 | CacoP | CacoP+ | 13 | O=c1c(en(C2CC2)c2c1cc(c(c2)N1CC[NH+](CCC)C(C)C1)F)C(=O)[O-]                                                               |
| C1348 | CacoP | CacoP+ | 13 | O[C@@H](C[N@@H+])(Cc1ccc(cc1)Br)NC(=O)[C@@H](C(C)(C)C)CC(=O)OC)(Cc1ccccc1)C(=O)NCc1ccccc1                                 |
| C1349 | CacoP | CacoP+ | 13 | Nc1nc2c(cc(c2)/C=C/C(=O)N)/c2ccccc2)n1S(=O)(=O)C(C)C                                                                      |
| C1350 | CacoP | CacoP+ | 13 | CCCCCCCCC(=O)OC(C)C                                                                                                       |
| C1351 | CacoP | CacoP+ | 13 | CCCCCCCCC(=O)Nc1ccc(cc1)OC                                                                                                |
| C1352 | CacoP | CacoP+ | 13 | Oc1ccc2c(c1)CC[C@@H]1[C@@H]2CC[C@]2(C)[C@@H](O)CC[C@@H]12                                                                 |
| C1353 | CacoP | CacoP+ | 13 | Nc1nc2ccc(cc2n1S(=O)(=O)[N-]C(=O)N(C)C)/C=C/C(=O)N/c1ccccc1)F                                                             |
| C1354 | CacoP | CacoP+ | 13 | O=C(c1en(CC)c2c(cc(c(c2F)N2CC(C)[NH2+]CC2)F)c1=O)[O-]                                                                     |
| C1355 | CacoP | CacoP+ | 13 | C#CC#CCCC/C=C/C(=O)NCC(C)C                                                                                                |
| C1356 | CacoP | CacoP+ | 13 | O=c1c2c(cc(c(c2O)OC)O)oc(c1)c1ccc(cc1)O                                                                                   |
| C1357 | CacoP | CacoP+ | 13 | CC(C(=C)CCC(C(=O)[O-])[C@H]1[C@H](O)C[C@]2(C)[C@]1(C)CC=C1C2=CC[C@@H]2[C@]1(C)CC[C@H](C2(C)C)O)C                          |
| C1358 | CacoP | CacoP+ | 13 | O=c1c(c(c2ccc(c(c2)O)O)oc2c1c(cc(c2)O)O)O                                                                                 |
| C1359 | CacoP | CacoP+ | 13 | Nc1nc2ccc(cc2n1S(=O)(=O)C(C)C)/C=C/C(=O)NCC/c1ccccc1)F)F                                                                  |
| C1360 | CacoP | CacoP+ | 13 | O=C1CN=C(c2ccccc2)c2cc(ccc2N1)Cl                                                                                          |
| C1361 | CacoP | CacoP+ | 13 | O=C(c1cnn1CCc1ccccc1)Nc1ccc(cc1)C(C)(C)C                                                                                  |
| C1362 | CacoP | CacoP+ | 13 | Clc1ccc(c(c1)F)C[C@@H](C)C(=O)N1CCN(c2c(cc(cc2)C)[C@@H](NC(=O)CC[NH+](C)C)C(C)C)CC1                                       |
| C1363 | CacoP | CacoP+ | 13 | O=C(N)c1ccccc1)Cc1ncccc1                                                                                                  |
| C1364 | CacoP | CacoP+ | 13 | [NH3+]Cc1ccccc1)Cn1cnc2c1ccccc2                                                                                           |
| C1365 | CacoP | CacoP+ | 13 | CCCCCCCCC(=O)Oc1ccc(cc1)Cl                                                                                                |
| C1366 | CacoP | CacoP+ | 13 | O=C1[C@@H]2C[C@@H](O)c3nc(nc4c3cccc4C)OC)c3cc(ccc3)F)C[C@H]2C(=O)N(CCCC/C=C\C[CH]2[C@@H](N1)(C(=O)[N-]S(=O)(=O)C1CC1)C2)C |
| C1367 | CacoP | CacoP+ | 13 | O=C([N-]S(=O)(=O)c1ccc(cc1OC)C)C(c1cc2c(cc1)OCO2)c1cn(c2c1ccc(c2)C#N)C                                                    |
| C1368 | CacoP | CacoP+ | 13 | CC#CC#CCC/C=C\C=C(=O)NCC(C)CC                                                                                             |
| C1369 | CacoP | CacoP+ | 12 | CC[C@@]1(O)C(=O)OCc2c1cc1n(Cc3cc4ccccc4nc13)c2=O                                                                          |
| C1370 | CacoP | CacoP+ | 13 | O=C(Nc1ccccc1)OCCCC)OCC[NH+]1CCCC1                                                                                        |
| C1371 | CacoP | CacoP+ | 13 | O=C1c2c(cc(cc2OC(c2ccc(cc2)O)C1)O)O                                                                                       |
| C1372 | CacoP | CacoP+ | 13 | O=c1c(c(c2ccc(cc2)OC)oc2c1c(cc(c2)O)O)O                                                                                   |
| C1373 | CacoP | CacoP+ | 13 | C[NH+]1C2CC[C@@H]1C[C@H](OC(c1ccc(cc1)Cl)c1ccccc1)C2                                                                      |
| C1374 | CacoP | CacoP+ | 13 | O=C(NCC1CC[NH+](CC2CCOCC2)CC1)[C@@H](Cc1ccccc1)NC(=O)C1(CCCC1)NC(=O)c1cc2ccccc2s1                                         |
| C1375 | CacoP | CacoP+ | 13 | CCCCCCCCC(=O)OCCCC                                                                                                        |
| C1376 | CacoP | CacoP+ | 13 | O=c1c(en(C2CC2)c2c1cc(c(c2)N1CC[NH+](C)C(C)C1)F)C(=O)[O-]                                                                 |
| C1377 | CacoP | CacoP+ | 13 | O[C@H]1[C@@H](OC)C[C@@]2(C)[C@H](C(=O)C=C3C2CC[C@@]2(C)[C@@]3(O)CC[C@@H]2[C@@](C)(O)[C@H](O)CCC(C)C)C1                    |
| C1378 | CacoP | CacoP+ | 13 | O=C1C=C[C@]2(C)[C@H]3C(O)C[C@]4(C)[C@](C(=O)CO)(O)CC[C@@H]4[C@@H]3CCCC=C1                                                 |

|       |       |        |    |                                                                                                                                              |
|-------|-------|--------|----|----------------------------------------------------------------------------------------------------------------------------------------------|
| C1379 | CacoP | CacoP+ | 13 | Ne1nc2ccc(cc2n1S(=O)(=O)C(C)C)/C(=C/C(=O)N)/c1cc(c(cc1)F)F                                                                                   |
| C1380 | CacoP | CacoP+ | 13 | O=c1c2c(cc(cc2oc(c1)c1cc(c(cc1)OC)O)O)O                                                                                                      |
| C1381 | CacoP | CacoP+ | 13 | O[C@@H]1[C@H](O)C[C@H]2C(=O)C=C3C(CC[C@@]4(C)[C@@]3(O)CC[C@@H]4[C@@](C(O)[C@H](OC)CCC(C)(O)C)[C@]2(C)C)1                                     |
| C1382 | CacoP | CacoP+ | 13 | O=c1n(C)c(=O)n(C)c(c1)[NH+]1CC[NH+](CCC1)CCCN1c2ccc2Se2c1cc(cc2)CC(=O)[O-]                                                                   |
| C1383 | CacoP | CacoP+ | 13 | OC([C@@H]1[NH+]2CC[C@H]([C@H](C2)C=C)C1)c1ccnc2ccc(cc12)OC                                                                                   |
| C1384 | CacoP | CacoP+ | 13 | C/C=C\C=C/CC/C=C/C=C/C(=O)NCC(C)C                                                                                                            |
| C1385 | CacoP | CacoP+ | 13 | Ne1nc2c(cc(cc2)/C(=C/C(=O)NC)/c2cccc(c2F)F)n1S(=O)(=O)C(C)C                                                                                  |
| C1386 | CacoP | CacoP+ | 13 | O=C1N[C@@]2[C[C@H]2/C=C/CCCCN(C)C(=O)[C@H]2[C@H]1C[C@H](C2)Oc1nc(nc2c1ccc(c2C)OC)c1cccc1C(=O)[N-]S(=O)(=O)C1CC1                              |
| C1387 | CacoP | CacoP+ | 13 | CC#CC#CCC/C=C\C=C(=O)NCC(C)C                                                                                                                 |
| C1388 | HIA   | HIA-   | 24 | c(=O)[C@H](CCN)O)N[C@@H]1C[C@@H]([C@H]([C@@H]([C@H]1O[C@H]1[C@H]([C@@H]([C@H]([C@H]([C@H]([C@H](CO)O1)O)N)O)O)[C@@H]1[C@H](CC[C@H](CN)O1)N)N |
| C1389 | HIA   | HIA-   | 24 | c1ccc(cc1)C(C(=O)NC1C(=O)N2C(C(=O)O)C(C)(C)SC12)NC(=O)N1C(=O)NCC1                                                                            |
| C1390 | HIA   | HIA-   | 24 | c1(csc(n1)N)/C(=N/OC)/C(=O)NC1C(=O)N2C(=C(CSC12)CSc1nc(c(CC(=O)O)s1)C)C(=O)O                                                                 |
| C1391 | HIA   | HIA-   | 24 | CC1(C(C(C(OC1)OC1C(CC(C(C1O)OC1C(CCC(C(C)NC)O1)N)N)O)NC)O                                                                                    |
| C1392 | HIA   | HIA-   | 24 | CCC1CCC(C(OC2C(CC(C(C2O)OC2C(C(C(C)(CO2)O)NC)O)N)O1)N                                                                                        |
| C1393 | HIA   | HIA-   | 24 | c12c3cc(cc1c(=O)n(c(=O)c2cc(c3N)S(=O)(=O)O)NNC(=O)NN)S(=O)(=O)O                                                                              |
| C1394 | HIA   | HIA-   | 24 | C1(=C(C(C)C2C(C(=O)N12)C(C)O)SC1CCC(C(=O)N(C)C)N1)C(=O)O                                                                                     |
| C1395 | HIA   | HIA-   | 24 | c1ccc(cc1)C(C(=O)NC1C(=O)N2C(C(=O)O)C(C)(C)SC12)NC(=O)N1C(=O)N(CC1)S(=O)(=O)C                                                                |
| C1396 | HIA   | HIA-   | 24 | C1=C(CN)OC(CC1N)OC1C(CC(C(C1O)OC1C(C(C(C)(CO1)O)NC)O)NCC)N                                                                                   |
| C1397 | HIA   | HIA-   | 24 | c1cc(ccc1C(=N)N)OCCCCOC1ccc(cc1)C(=N)N                                                                                                       |
| C1398 | HIA   | HIA-   | 24 | C1(C(C(CO)(OC1CO)OC1C(C(C(C(COC2C(C(C(C(CO)O2)O)O)O)O1)O)O)O)O)O                                                                             |
| C1399 | HIA   | HIA-   | 24 | C(=O)(NC1C(C(C(CO)OC1O)O)O)N(C)N=O                                                                                                           |
| C1400 | HIA   | HIA-   | 24 | C1C(C(C(C(C1N)OC1C(C(C(C(CO)O1)O)N)O)O)OC1C(CC(C(CN)O1)O)N)N                                                                                 |
| C1401 | HIA   | HIA-   | 24 | c1(csc(n1)N)/C(=N/OC(C(=O)O)(C)C)/C(=O)NC1C(=O)N(C1C)S(=O)(=O)O                                                                              |
| C1402 | HIA   | HIA-   | 24 | c1(csc(n1)N)/C(=N/OC)/C(=O)NC1C(=O)N2C(=C(CSC12)CSc1nc(=O)c(nm1C)O)C(=O)O                                                                    |
| C1403 | HIA   | HIA-   | 24 | C1(C(C(C(OC2C(C(CO)(O)OC2CO)O)OC1CO)O)O)O                                                                                                    |
| C1404 | HIA   | HIA-   | 24 | C1=C(C(C(C(C1NC1C(C(C(OC1C)OC1C(C(C(OC1CO)OC1C(C(C(O)OC1CO)O)O)O)O)O)O)O)O)O)CO                                                              |
| C1405 | HIA   | HIA-   | 24 | c1c2c(c(c3c1c(=O)cc(C(=O)O)o3)CCC)n(c(cc2=O)C(=O)O)CC                                                                                        |
| C1406 | HIA   | HIA-   | 24 | C1C(C(C(C(C1N)O)OC1C(C(C(CO)O1)OCC1C(C(C(C(CN)O1)O)O)N)O)OC1C(C(C(C(CN)O1)O)O)N)N                                                            |
| C1407 | HIA   | HIA-   | 24 | C(#N)C(c1cccc1)OC1C(C(C(C(COC2C(C(C(C(CO)O2)O)O)O1)O)O)O                                                                                     |
| C1408 | HIA   | HIA-   | 24 | c1(csc(n1)N)/C(=N/OC)/C(=O)NC1C(=O)N2C(=C(COC(=O)C)CSC12)C(=O)O                                                                              |
| C1409 | HIA   | HIA-   | 24 | c1cc(ccc1NC(=N)NC(=N)NCCCCNC(=N)NC(=N)Ne1ccc(cc1)Cl)Cl                                                                                       |
| C1410 | HIA   | HIA-   | 24 | c1(c(c(c(c(c1I)NC(=O)C)I)NC(=O)C)I)C(=O)O                                                                                                    |
| C1411 | HIA   | HIA-   | 24 | C(=O)(CN(CC(=O)O)CCN(CC(=O)O)CC(=O)O)O                                                                                                       |
| C1412 | HIA   | HIA-   | 24 | C1(=C(CC2C(C(=O)N12)C(C)O)SCC/N=C/N)C(=O)O                                                                                                   |
| C1413 | HIA   | HIA-   | 24 | c1(c(c(c(c(c1I)N(C(=O)C)CC(CO)O)I)C(=O)NCC(CO)O)I)C(=O)NCC(CO)O                                                                              |
| C1414 | HIA   | HIA-   | 24 | c1c(c(c(c(c1I)NC(=O)COCCOCCOCC(=O)Ne1c(cc(c(c1I)C(=O)O)I)I)I)C(=O)O)I                                                                        |
| C1415 | HIA   | HIA-   | 24 | c1ccc(c(c1)C(=O)Ne1ccc(cc1)S(=O)(=O)Ne1nccs1)C(=O)O                                                                                          |
| C1416 | HIA   | HIA-   | 24 | c1cc(ccc1NC(=O)CCC(=O)O)S(=O)(=O)Ne1nccs1                                                                                                    |
| C1417 | HIA   | HIA-   | 24 | C1(=O)CC2N1C(C(=O)O)C(C)(C)S2(=O)=O                                                                                                          |
| C1418 | HIA   | HIA-   | 24 | c1c(csc1)C(C(=O)NC1C(=O)N2C(C(=O)O)C(C)(C)SC12)C(=O)O                                                                                        |
| C1419 | HIA   | HIA-   | 24 | C(#N)SCC(=O)NC1(C(=O)N2C(=C(CSC12)CSc1nmm1C)C(=O)O)OC                                                                                        |
| C1420 | HIA   | HIA-   | 24 | C(=O)(C)NCCCS(=O)(=O)O                                                                                                                       |
| C1421 | HIA   | HIA-   | 24 | c1ccc(cc1)CCC(C(=O)O)NC1C(=O)N2C(C(=O)O)CCCN2CCC1                                                                                            |
| C1422 | HIA   | HIA-   | 24 | C(=O)(C1CC(CCC)CN1C)NC(C(C)O)C1C(C(C(C(O1)SC)O)O)O                                                                                           |
| C1423 | HIA   | HIA-   | 24 | C(#C)c1cn(c(=O)[nH]c1=O)C1C(C(C(CO)O1)O)O)C                                                                                                  |
| C1424 | HIA   | HIA+   | 24 | c1(en2c(nc1=N)OC1C(C(CO)OC21)O)F                                                                                                             |



|       |     |      |    |                                                                          |
|-------|-----|------|----|--------------------------------------------------------------------------|
| C1425 | HIA | HIA+ | 24 | c1cc2c(c(c1)OCC(CNC(C)(C)C)O)CC(C(C2)O)O                                 |
| C1426 | HIA | HIA+ | 24 | c1c(c(ccc1S(=O)(=O)N)OC)C(=O)NCC1CCN(CC)C1                               |
| C1427 | HIA | HIA+ | 24 | c1(csc(n1)N=C(N)N)CSCC/C(=N/S(=O)(=O)N)/N                                |
| C1428 | HIA | HIA+ | 24 | c1c(cc(cc1O)O)C(CNC(C)C)O                                                |
| C1429 | HIA | HIA+ | 24 | C=CC12CCC(CC1(CCC1C2CCC2(C)C(C3=CC(=O)OC3)CCC12O)O)OC1CC(C(C(C)O1)O)OC   |
| C1430 | HIA | HIA+ | 24 | c1cc(c(cc1C(C1CCCN1)O)O)O                                                |
| C1431 | HIA | HIA+ | 24 | c1cc(ccc1CC(=O)N)OCC(CNC(C)C)O                                           |
| C1432 | HIA | HIA+ | 24 | c1ccc2c(c1)OCC(CNC(=N)N)O2                                               |
| C1433 | HIA | HIA+ | 24 | C(=N)(N)NC(=N)N(C)C                                                      |
| C1434 | HIA | HIA+ | 24 | C(=O)(C(CCCN)(C(F)F)N)O                                                  |
| C1435 | HIA | HIA+ | 24 | c1ccc(c(c1)c1ccc(cc1)CN(C(=O)CCCC)C(C(=O)O)C(C)C)c1[nH]nnn1              |
| C1436 | HIA | HIA+ | 24 | c12c(c(nc(n1)N(CCO)CCO)N1CCCCC1)nc(nc2N1CCCCC1)N(CCO)CCO                 |
| C1437 | HIA | HIA+ | 24 | c1cc2c(c(c1)O)C(=C1C(=O)C3(C(=O)C(=C(C(C3C(C1C2(C)O)O)N(C)C)O)C(=O)N)O)O |
| C1438 | HIA | HIA+ | 24 | c1ccc(cc1)CCC(C(=O)OCC)NC1C(=O)N2C(C(=O)O)CCCN2CCC1                      |
| C1439 | HIA | HIA+ | 24 | c1cc(ccc1CC(C)NC(Cc1cc(cc1)O)O)O                                         |
| C1440 | HIA | HIA+ | 24 | c1cc(c2c3e1CC1C4(CCC(=O)C(C34CCN1C)O2)O)OC                               |
| C1441 | HIA | HIA+ | 24 | c1cc(C(CNC(C)(C)C)O)nc(c1O)CO                                            |
| C1442 | HIA | HIA+ | 24 | c1ccc(cc1)CCC(C(=O)OCC)NC(C(=O)N1C(C(=O)O)CC2CCCC12)C                    |
| C1443 | HIA | HIA+ | 24 | c12c(cccc1)snc2N1CCN(CCc2cc3c(cc2Cl)NC(=O)C3)CC1                         |
| C1444 | HIA | HIA+ | 24 | c1cc(CNc2cc(cc(c2C(=O)O)S(=O)(=O)N)Cl)oc1                                |
| C1445 | HIA | HIA+ | 24 | c1ccnc(c1)NS(=O)(=O)c1ccc(cc1)/N=N/c1cc(c(cc1)O)C(=O)O                   |
| C1446 | HIA | HIA+ | 24 | c1c(cc(cc1O)O)C(CNC(C)C)C)O                                              |
| C1447 | HIA | HIA+ | 24 | c1ccc2c(c1)C(=O)NC2(c1ccc(c(c1)S(=O)(=O)N)Cl)O                           |
| C1448 | HIA | HIA+ | 24 | c12c(cc(cc1)OC)c(ccc2C(=S)N(CC(=O)O)C)C(F)(F)F                           |
| C1449 | HIA | HIA+ | 24 | c1c(c(cc2c1NCNS2(=O)=O)S(=O)(=O)N)C(F)(F)F                               |
| C1450 | HIA | HIA+ | 24 | c12c(ccc(c1)CS(=O)(=O)NC)[nH]cc2CCN(C)C                                  |
| C1451 | HIA | HIA+ | 24 | c1cc(c(c2c1N=C1NC(=O)CN1C2)Cl)Cl                                         |
| C1452 | HIA | HIA+ | 24 | c1cc(c(c(c1CNNC(=O)C(CO)N)O)O)O                                          |
| C1453 | HIA | HIA+ | 24 | c1c(c(c(cc1Br)Br)N)CN(C1CCCCC1)C                                         |
| C1454 | HIA | HIA+ | 24 | c1cc(c2c(c1)C1CCOC(CC(=O)O)(CC(=O)O)C1N2)CC                              |
| C1455 | HIA | HIA+ | 24 | c12c(nc(nc1)N)n(en2)CCC(COC(=O)C)COC(=O)C                                |
| C1456 | HIA | HIA+ | 24 | c1ccc(cc1)CNNC(=O)c1cc(C)on1                                             |
| C1457 | HIA | HIA+ | 24 | c1ccc2c(c1)Cc1cccc1N1C2CN(CC1)C                                          |
| C1458 | HIA | HIA+ | 24 | c1c(c(cc(c1OC(=O)C)C)OCCN(C)C)C(C)C                                      |
| C1459 | HIA | HIA+ | 24 | c1ccc2c(c1)n(c(=O)[nH]2)C1CCN(CCC(c2ccc(cc2)F)c2ccc(cc2)F)CC1            |
| C1460 | HIA | HIA+ | 24 | c1cc(c(c(c1)C)NC(=O)NCCCNC(C)C)C                                         |
| C1461 | HIA | HIA+ | 24 | c1(csc(n1)N)/C(=N/OC)/C(=O)NC1C(=O)N2C(=CCSC12)C(=O)O                    |
| C1462 | HIA | HIA+ | 24 | C1(=O)C(CON1)N                                                           |
| C1463 | HIA | HIA+ | 24 | c12c(cccc1)oc(c2C(=O)c1cc(c(c1)Br)O)Br)CC                                |
| C1464 | HIA | HIA+ | 24 | c1ccc2c(c1)C(=Nc1cccc1S2)N1CCN(CC1)CCOCCO                                |
| C1465 | HIA | HIA+ | 24 | c12c(ccc(c1)CS(=O)(=O)N1CCCCC1)[nH]cc2CCN(C)C                            |
| C1466 | HIA | HIA+ | 24 | C(=C\1/C(C(=O)O)N2C(=O)CC2O1)\CO                                         |
| C1467 | HIA | HIA+ | 24 | C(CS(=O)(=O)O)S                                                          |
| C1468 | HIA | HIA+ | 24 | C1=C(C(=O)OCC)CC(C(C1OC(CC)CC)NC(=O)C)N                                  |
| C1469 | HIA | HIA+ | 24 | c1ccc(cc1)C1(C(=O)NCNC1=O)CC                                             |
| C1470 | HIA | HIA+ | 24 | C1=CC2CC3C4C=CC(C5C4(CCN3CC)C2C(=C1O)O5)O                                |

|       |     |      |    |                                                                               |
|-------|-----|------|----|-------------------------------------------------------------------------------|
| C1471 | HIA | HIA+ | 24 | <chem>c12c(cc(cc1)OC(F)F)nc([nH]2)S(=O)Cc1c(c(ccn1)OC)OC</chem>               |
| C1472 | HIA | HIA+ | 24 | <chem>c1ccc(cc1)C1(CCC1)C(CC(C)C)N(C)C)Cl</chem>                              |
| C1473 | HIA | HIA+ | 24 | <chem>c1ccc(cc1)C(c1ccc(cc1)O)C)CCN(C(C)C)C(C)C</chem>                        |
| C1474 | HIA | HIA+ | 24 | <chem>c1cc(c(c(c1)Cl)/C=N/NC(=N)N)Cl</chem>                                   |
| C1475 | HIA | HIA+ | 24 | <chem>c12c(c(ccc1)C(F)(F)F)nc(cc2C(C1CCCCN1)O)C(F)(F)F</chem>                 |
| C1476 | HIA | HIA+ | 24 | <chem>c1ccc(c(c1)N1CCN(CCCNc2cc(=O)n(c(=O)n2C)C)CC1)OC</chem>                 |
| C1477 | HIA | HIA+ | 24 | <chem>c1cc(ccc1C(=O)C)S(=O)(=O)/N=C(/NC1CCCCC1)O</chem>                       |
| C1478 | HIA | HIA+ | 24 | <chem>c12c([nH]nc1)nc[nH]c2=O</chem>                                          |
| C1479 | HIA | HIA+ | 24 | <chem>c12c3c(cccc3COC(CNCCO)c3ccccc3OC)O[nH]c1cccc2</chem>                    |
| C1480 | HIA | HIA+ | 24 | <chem>c1ccnc(c1)N(c1ccc(cc1)Cl)CCN(C)C</chem>                                 |
| C1481 | HIA | HIA+ | 24 | <chem>c1ccc(c(c1)C1=NCC(=O)Nc2c1cc(cc2)[N+](=O)[O-])Cl</chem>                 |
| C1482 | HIA | HIA+ | 24 | <chem>c1cc(ccc1c1ccc(/C=N/N2C(=O)NC(=O)C2)o1)[N+](=O)[O-]</chem>              |
| C1483 | HIA | HIA+ | 24 | <chem>c1cc(ccc1C(=O)c1c(C)[nH]c(=O)[nH]1)SC</chem>                            |
| C1484 | HIA | HIA+ | 24 | <chem>c1cc(c(c(c1)Cl)c1c(c(C)on1)C(=O)NC1C(=O)N2C(C(=O)O)C(C)(C)SC12)F</chem> |
| C1485 | HIA | HIA+ | 24 | <chem>c1ccc(cc1)CCCN1CCN(C(c2ccc(cc2)F)c2ccc(cc2)F)CC1</chem>                 |
| C1486 | HIA | HIA+ | 24 | <chem>c1ccc(cc1)C(CCNC)Oc1ccc(cc1)C(F)(F)F</chem>                             |
| C1487 | HIA | HIA+ | 24 | <chem>C(=N)(N)NCC1COC2(CCCCC2)O1</chem>                                       |
| C1488 | HIA | HIA+ | 24 | <chem>c1c(ccnc1)C(=O)NN</chem>                                                |
| C1489 | HIA | HIA+ | 24 | <chem>c1c(c(ccc1N)O)C(=O)O</chem>                                             |
| C1490 | HIA | HIA+ | 24 | <chem>c1ccc(cc1)C(c1ccccc1)(C(=O)CC)CC(C)N(C)C</chem>                         |
| C1491 | HIA | HIA+ | 24 | <chem>c1cc(cc(c1)OC)CC(C)N</chem>                                             |
| C1492 | HIA | HIA+ | 24 | <chem>c1ccc(cc1)C(C(=O)OC)C1CCCCN1</chem>                                     |
| C1493 | HIA | HIA+ | 24 | <chem>c1ccc(cc1)C(c1ccccc1)S(=O)CC(=O)N</chem>                                |
| C1494 | HIA | HIA+ | 24 | <chem>c12c(ccc(c1)CCC(=O)C)cc(cc2)OC</chem>                                   |
| C1495 | HIA | HIA+ | 24 | <chem>c12c(cc(cc1)OC)nc([nH]2)S(=O)Cc1c(c(cn1)C)OC)C</chem>                   |
| C1496 | HIA | HIA+ | 24 | <chem>c1c(c(cc2c1CCC(CNC(C)C)N2)[N+](=O)[O-])CO</chem>                        |
| C1497 | HIA | HIA+ | 24 | <chem>c12c(CC(CC1)NCCC)sc(n2)N</chem>                                         |
| C1498 | HIA | HIA+ | 24 | <chem>c12c(ccc(c1)OC)nc2c(C1CC2CCN1CC2C=C)O</chem>                            |
| C1499 | HIA | HIA+ | 24 | <chem>c1c(c(cc2c1nc1c(nc(=O)[nH]c1=O)n2CC(C(C(CO)O)O)O)C)C</chem>             |
| C1500 | HIA | HIA+ | 24 | <chem>C(#CC(C)C)C/C=C/CN(Cc1c2c(ccc1)cccc2)C</chem>                           |
| C1501 | HIA | HIA+ | 24 | <chem>c1ccc(c(c1)CN1Cc2csc2CC1)Cl</chem>                                      |
| C1502 | HIA | HIA+ | 24 | <chem>c1ccc2c(c1)N(c1ccccc1S2)CC(C)CN(C)C</chem>                              |
| C1503 | HIA | HIA+ | 24 | <chem>c1ccc2c(c1)CCc1ccccc1N2CC(C)CN(C)C</chem>                               |
| C1504 | HIA | HIA+ | 24 | <chem>C(=C\C(C(=C\CO)\C)/C=C(/C=C/C1=C(C)CCCC1(C)C)\C</chem>                  |
| C1505 | HIA | HIA+ | 24 | <chem>c1c(c(ccc1OCC(F)(F)F)OCC(F)(F)F)C(=O)NCC1CCCCN1</chem>                  |
| C1506 | HIA | HIA+ | 24 | <chem>c1ccc(c(c1)C(=O)O)OC(=O)C</chem>                                        |
| C1507 | HIA | HIA+ | 24 | <chem>c1cc(ccc1C(CCCN(CC)CCCCCCC)O)NS(=O)(=O)C</chem>                         |
| C1508 | HIA | HIA+ | 24 | <chem>C1=CC2(C(=CC1=O)C(C)CC1C3CCC(C(=O)CO)(C3(C)CC(C21)O)O)C</chem>          |
| C1509 | HIA | HIA+ | 24 | <chem>c1cc(ccc1C(CP(=O)(OC)OC)P(=O)(OC)OC)Cl</chem>                           |
| C1510 | HIA | HIA+ | 24 | <chem>c1cc(c(cc1C(CNC(C)C)C)O)C(=O)O)O</chem>                                 |
| C1511 | HIA | HIA+ | 24 | <chem>C(#N)c1cc(c2cnc2)c(C)[nH]c1=O</chem>                                    |
| C1512 | HIA | HIA+ | 24 | <chem>c1ccc(cc1)CC(C(=O)O)NC(=O)C1CCC(CC1)C(C)C</chem>                        |
| C1513 | HIA | HIA+ | 24 | <chem>c1ccnc(c1)C1=NCC(=O)Nc2c1cc(cc2)Br</chem>                               |
| C1514 | HIA | HIA+ | 24 | <chem>c1c(c(ccc1NC(=O)CCC)OCC(CNC(C)C)O)C(=O)C</chem>                         |
| C1515 | HIA | HIA+ | 24 | <chem>c1cc(ccc1NC(=O)C)O</chem>                                               |
| C1516 | HIA | HIA+ | 24 | <chem>c1cc(ccc1NC(=N)NC(=N)NC(C)C)Cl</chem>                                   |

|       |     |      |    |                                                           |
|-------|-----|------|----|-----------------------------------------------------------|
| C1517 | HIA | HIA+ | 24 | c12c(cccc1)[nH]cc2C(=O)OC1CC2CC3C(=O)CN2C(C3)C1           |
| C1518 | HIA | HIA+ | 24 | c1cc(c(cc1C(NC(C)C)O)O)O                                  |
| C1519 | HIA | HIA+ | 24 | c12c(cccc1)nc([nH]2)S(=O)Cc1cc(c(en1)C)OCC(F)(F)F         |
| C1520 | HIA | HIA+ | 24 | c1ccc(cc1)C(C(C)NCCC(=O)c1cccc(c1)OC)O                    |
| C1521 | HIA | HIA+ | 24 | c1ccc(cc1)Oc1c(cc(cc1S(=O)(=O)N)C(=O)O)N1CCCC1            |
| C1522 | HIA | HIA+ | 24 | c1cc(ccc1N)S(=O)(=O)Nc1nnc(C)s1                           |
| C1523 | HIA | HIA+ | 24 | c1ccc(c(c1)c1c2cc(ccc2n2c(en1)[nH]nc2C)Cl)Cl              |
| C1524 | HIA | HIA+ | 24 | c1cn(c(=O)nc1N)C1CCC(CO)O1                                |
| C1525 | HIA | HIA+ | 24 | C1(=NC(=O)N(CC1)C1CSC(CO)O1)N                             |
| C1526 | HIA | HIA+ | 24 | c12c(cccc1)n(Cc1ccccc1)nc2OCCCN(C)C                       |
| C1527 | HIA | HIA+ | 24 | c1cc(ccc1C(=O)C(C)NC(C)(C)C)Cl                            |
| C1528 | HIA | HIA+ | 24 | C(#N)N/C(=N/C)/NCCSCc1c(C)[nH]en1                         |
| C1529 | HIA | HIA+ | 24 | C(=O)(C1CC(CCC)CN1C)NC(C1C(C(C(C(O1)SC)O)O)O)C(C)Cl       |
| C1530 | HIA | HIA+ | 24 | c1cc(/C=C/C(=O)O)nc(c1)/C(=C/CN1CCCC1)/c1ccc(cc1)C        |
| C1531 | HIA | HIA+ | 24 | C(=S)(N(CC)CC)SSC(=S)N(CC)CC                              |
| C1532 | HIA | HIA+ | 24 | c1c(c(cc(c1Cl)N)OC)C(=O)NCCN(CC)CC                        |
| C1533 | HIA | HIA+ | 24 | C(=C\C1C(C(=O)CC1O)CCCCCCC(=O)OC)/CC(C)(CCCC)O            |
| C1534 | HIA | HIA+ | 24 | c1ccc2c(c1)N(c1cc(ccc1S2)NC(=O)OCC)C(=O)CCN1CCOCC1        |
| C1535 | HIA | HIA+ | 24 | c1(c(nc(C)nc1Cl)OC)NC1=NCCN1                              |
| C1536 | HIA | HIA+ | 24 | c1cc(cc(c1)[N+](=O)[O-])C1C(=C(C)NC(=C1C(=O)OCC)C)C(=O)OC |
| C1537 | HIA | HIA+ | 24 | c1c2c(nc(c1F)N1CC3C(C3N)C1)n(c1ccc(cc1F)F)cc(c2=O)C(=O)O  |
| C1538 | HIA | HIA+ | 24 | c1cc(c2c3e1CC1C4CCC(C(C34CCN1C)O2)O)OC                    |
| C1539 | HIA | HIA+ | 24 | c1c(c(ccc1S(=O)(=O)CC)OC)C(=O)NCC1CCCN1CC                 |
| C1540 | HIA | HIA+ | 24 | C1(c2cc(ccc2N(C1=O)C(=O)N)Cl)C(=O)c1ccs1                  |
| C1541 | HIA | HIA+ | 24 | c1cc(ccc1C(c1ccc(cc1)F)N1CCN(c2nc(nc(n2)NCC=C)NCC=C)CC1)F |
| C1542 | HIA | HIA+ | 24 | C1C2CC3CC1CC(C2)(C3)N                                     |
| C1543 | HIA | HIA+ | 24 | c1ccc(cc1)CC(C)N                                          |
| C1544 | HIA | HIA+ | 24 | c1ccc2c(c1)C(=C1CCN(CC1)C)c1c(cccn1)CC2                   |
| C1545 | HIA | HIA+ | 24 | c1cc(ccc1CCOCC1CC1)OCC(CNC(C)C)O                          |
| C1546 | HIA | HIA+ | 24 | c1cc(ccc1COCCOC(C)C)OCC(CNC(C)C)O                         |
| C1547 | HIA | HIA+ | 24 | c1c2c(ccc1Cl)oc(=O)[nH]2                                  |
| C1548 | HIA | HIA+ | 24 | c1cc(ccc1N)S(=O)(=O)c1ccc(cc1)O                           |
| C1549 | HIA | HIA+ | 24 | C1=CC2(C(=CC1=O)CCC1C3CC(C)C(C(=O)CO)(C3(C)CC(C21F)O)O)C  |
| C1550 | HIA | HIA+ | 24 | c1cc(ccc1/C(=C(\c1ccc(cc1)O)/CC)/CC)O                     |
| C1551 | HIA | HIA+ | 24 | c1cc(c(cc1c1ccc(cc1F)F)C(=O)O)O                           |
| C1552 | HIA | HIA+ | 24 | c1cc(ccc1N(C(=O)C(Cl)Cl)C)O                               |
| C1553 | HIA | HIA+ | 24 | c1cc(c(c(c1C(=O)C(=O)CC)Cl)Cl)OCC(=O)O                    |
| C1554 | HIA | HIA+ | 24 | c1ccc(cc1)C(COC(=O)N)COC(=O)N                             |
| C1555 | HIA | HIA+ | 24 | C1(C(=O)N(c2ccccc2)N(c2ccccc2)C1=O)CC=C(C)C               |
| C1556 | HIA | HIA+ | 24 | c1c(c(ccc1NC(=O)C(C)C)[N+](=O)[O-])C(F)(F)F               |
| C1557 | HIA | HIA+ | 24 | c1cc(ccc1/C(=N/OCCN)/CCCCOC)C(F)(F)F                      |
| C1558 | HIA | HIA+ | 24 | C1=CC2C3CCC(C(=O)C)(C3(C)CCC2C2(C1=CC(=O)CC2)C)OC(=O)CCCC |
| C1559 | HIA | HIA+ | 24 | C12C(C(CO1)O)[N+](=O)[O-]OCC2O[N+](=O)[O-]                |
| C1560 | HIA | HIA+ | 24 | c1ccc2c(c1)C(=C1CCN(CC1)C)c1ccsc1C(=O)C2                  |
| C1561 | HIA | HIA+ | 24 | c1cc2c(C(=C3CCN(C(=O)OCC)CC3)c3ccc(cc3CC2)Cl)nc1          |
| C1562 | HIA | HIA+ | 24 | c1ccc(c(c1)C(=O)O)Nc1ccccc(c1)C                           |

|       |     |      |    |                                                                                                               |
|-------|-----|------|----|---------------------------------------------------------------------------------------------------------------|
| C1563 | HIA | HIA+ | 24 | c1ccc2c(c1)C(=C(C(=O)Nc1ncc(C)s1)N(C)S2(=O)=O)O                                                               |
| C1564 | HIA | HIA+ | 24 | c1cc(c2c3c1CC1C4C=CC(C(C34CCN1C)O2)O)O                                                                        |
| C1565 | HIA | HIA+ | 24 | c1cc(C)nc2c1C(=O)C(C(=O)O)CN2CC                                                                               |
| C1566 | HIA | HIA+ | 24 | c1ccc(c(c1)C1C(=C(C)NC(=C1C(=O)OCC(C)C)C)C(=O)OC)[N+](=O)[O-]                                                 |
| C1567 | HIA | HIA+ | 24 | c12c(cc(c(c1)OC)OC)c(Cc1ccc(c(c1)OC)OC)ncc2                                                                   |
| C1568 | HIA | HIA+ | 24 | c1ccc(cc1)/N=N/c1ccc(nc1N)N                                                                                   |
| C1569 | HIA | HIA+ | 24 | c1ccc(cc1)C1(c2ccccc2)C(=O)NNC1=O                                                                             |
| C1570 | HIA | HIA+ | 24 | c1c(cc(CCC)nc1)C(=S)N                                                                                         |
| C1571 | HIA | HIA+ | 24 | C=CCC1(C(=C)NC(=NC1=O)O)C(C)CCC                                                                               |
| C1572 | HIA | HIA+ | 24 | c12c(cccc1)nc([nH]2)S(=O)Cc1c(c(ccn1)OCCCCOC)C                                                                |
| C1573 | HIA | HIA+ | 24 | c12c(cc(cc1)OC(F)(F)F)sc(n2)N                                                                                 |
| C1574 | HIA | HIA+ | 24 | c12c(c(c(c(c1n(cc(c2=O)C(=O)O)C1CC1)F)N1CC(C)NC(C)C1)F)N                                                      |
| C1575 | HIA | HIA+ | 24 | c1cc(ccc1N)S(=O)(=O)Nc1cc(C)nc(C)n1                                                                           |
| C1576 | HIA | HIA+ | 24 | c1cc(ccc1/C=C\1/c2ccc(cc2C(=C1C)CC(=O)O)F)S(=O)C                                                              |
| C1577 | HIA | HIA+ | 24 | C1(C(=O)OC(CC)C2(C)C(C(C(=O)C(C)CC(C)(C(C(C1=O)C)OC1C(C(CC(C)O1)N(C)C)O)OC)C)N(C(=O)O2)CCCCn1cc(c2ccnc2)nc1)C |
| C1578 | HIA | HIA+ | 24 | c12c(cccc1)nc(c1csen1)[nH]2                                                                                   |
| C1579 | HIA | HIA+ | 24 | c1c(c(C(=CCCN2CCCC(C(=O)O)C2)c2c(ccs2)C)sc1)C                                                                 |
| C1580 | HIA | HIA+ | 24 | C#CC1(CCC2C3C(C4=C(CC(=O)CC4)CC3C)CCCC12C)O                                                                   |
| C1581 | HIA | HIA+ | 24 | c1ccc(cc1)CC1=NCCN1                                                                                           |
| C1582 | HIA | HIA+ | 24 | C1=CC2C(=CC1=O)CCC1C3CC4C(C(=O)CO)(C3(C)CC(C21F)O)OC(C)(C)O4                                                  |
| C1583 | HIA | HIA+ | 24 | C1=C2CC(CCC2(C)C2CCC3(C)C(CCC3C(C)CCCC(C)C)C2C1)O                                                             |
| C1584 | HIA | HIA+ | 24 | c1cc(c2c3c1CC1C4(CCC(=O)C(C34CCN1CC=C)O2)O)O                                                                  |
| C1585 | HIA | HIA+ | 24 | c12c(cc(c(c1)OC)OC)nc(nc2N)N1CCN(C(=O)C2CCCO2)CC1                                                             |
| C1586 | HIA | HIA+ | 24 | c12c(c(ccc1)C1C(=C(C)NC(=C1C(=O)OC(C)C)C)C(=O)OC)non2                                                         |
| C1587 | HIA | HIA+ | 24 | c1ccc(c(c1)CC=C)OCC(CNC(C)C)O                                                                                 |
| C1588 | HIA | HIA+ | 24 | c1c(ccnc1)c1cc(c(=O)[nH]c1)N                                                                                  |
| C1589 | HIA | HIA+ | 24 | c1ccc(cc1)C(C(=O)OC1CC2C3C(C(C1)N2C)O3)CO                                                                     |
| C1590 | HIA | HIA+ | 24 | c1c(cc(c2c1OC(C)(C)C1CCC(=CC21)C)O)CCCCC                                                                      |
| C1591 | HIA | HIA+ | 24 | c1ccc(cc1)C(C(=O)OC1CC2CCC(C1)N2C)CO                                                                          |
| C1592 | HIA | HIA+ | 24 | c1ccc2c(c1)C(=Nc1cc(ccc1N2)Cl)N1CCN(CC1)C                                                                     |
| C1593 | HIA | HIA+ | 24 | c1cc(c(c(c1)Cl)Cl)C1C(=C(C)NC(=C1C(=O)OCC)C)C(=O)OC                                                           |
| C1594 | HIA | HIA+ | 24 | c1cc(cc(c1C(Cn1cncn1)(Cn1cncn1)O)F)F                                                                          |
| C1595 | HIA | HIA+ | 24 | c1cc(cnc1)C(=O)O                                                                                              |
| C1596 | HIA | HIA+ | 24 | c1c(C(=O)O)ncc(C)[n+][O-]                                                                                     |
| C1597 | HIA | HIA+ | 24 | c1ccc2c(c1)C(=CCCN(C)C)c1ccccc1CC2                                                                            |
| C1598 | HIA | HIA+ | 24 | C1(=NC(=NC(=O)C1(CC)CCC(C)C)O)O                                                                               |
| C1599 | HIA | HIA+ | 24 | c1ccc2c(c1)N=C(c1cc(ccc1O2)Cl)N1CCNCC1                                                                        |
| C1600 | HIA | HIA+ | 24 | c1cc(ccc1C(CCC(=O)O)N)Cl                                                                                      |
| C1601 | HIA | HIA+ | 24 | c1cn(C(=O)OCC)c(=S)n1C                                                                                        |
| C1602 | HIA | HIA+ | 24 | c1cc2c(c(c1)OCC(CNC(C)(C)C)O)CCC(=O)N2                                                                        |
| C1603 | HIA | HIA+ | 24 | C1=CCC(=CC1)C(C(=O)NC1C(=O)N2C(=C(C)CSC12)C(=O)O)N                                                            |
| C1604 | HIA | HIA+ | 24 | c1cc(ccc1S(=O)(=O)NC(=O)NCCC)Cl                                                                               |
| C1605 | HIA | HIA+ | 24 | c1(c(CCCl)sen1)C                                                                                              |
| C1606 | HIA | HIA+ | 24 | c1ccc2c(c1)CCc1ccc(cc1N2CCCN(C)C)Cl                                                                           |
| C1607 | HIA | HIA+ | 24 | c1cc(c(c(c1)Cl)N=C1NCCN1)Cl                                                                                   |
| C1608 | HIA | HIA+ | 24 | c1ccc2c(c1)/C(=C\CCN1CCN(CC1)CCO)/c1cc(ccc1S2)Cl                                                              |

|       |     |      |    |                                                              |
|-------|-----|------|----|--------------------------------------------------------------|
| C1609 | HIA | HIA+ | 24 | c1ccc(cc1)C(=O)C(C)N(CC)CC                                   |
| C1610 | HIA | HIA+ | 24 | c1ccc(cc1)C(c1ccnc1)(C(=O)N)CCN(C(C)C)C(C)C                  |
| C1611 | HIA | HIA+ | 24 | c1ccc2c(c1)n(c(=O)[nH]2)CCCN1CCC(CC1)Nn1c2ccc(cc2[nH]c1=O)C1 |
| C1612 | HIA | HIA+ | 24 | c1ccc2e(c1)/C(=C/CCN(C)C)/c1ccccc1SC2                        |
| C1613 | HIA | HIA+ | 24 | C1=C2CCC3C4CCC(C(=O)COC(=O)C)(C4(C)CC(C3(C2(C)CCC1=O)F)O)O   |
| C1614 | HIA | HIA+ | 24 | c1c2c(ccc1F)n1c(c(C(=O)OCC)nc1)CN(C2=O)C                     |
| C1615 | HIA | HIA+ | 24 | c1cc(cc(c1F)c1ccc(cc1)C(C(=O)O)C                             |
| C1616 | HIA | HIA+ | 24 | c1cc(e2c3c1CN(CCC13C=CC(CC1O2)O)C)OC                         |
| C1617 | HIA | HIA+ | 24 | c1ccc(cc1)S(=O)(=O)Nc1ncc(en1)OCCOC                          |
| C1618 | HIA | HIA+ | 24 | C1=C(CCCC1)C1(C(=O)N=C(N(C1=O)C)O)C                          |
| C1619 | HIA | HIA+ | 24 | c1ccc(cc1)C(=O)c1cccc(c1)C(C(=O)O)C                          |
| C1620 | HIA | HIA+ | 24 | c1ccc(cc1)C(=O)c1ccc2C(C(=O)O)CCn12                          |
| C1621 | HIA | HIA+ | 24 | c1ccc(cc1)C1CN2C(=N1)SCC2                                    |
| C1622 | HIA | HIA+ | 24 | c1ccc(c(c1)C1=NC(C(=O)Nc2c1cc(cc2)Cl)O)Cl                    |
| C1623 | HIA | HIA+ | 24 | c1cn(c(=S)[nH]1)C                                            |
| C1624 | HIA | HIA+ | 24 | c1c([N+](=O)[O-])n(c(C)n1)CCO                                |
| C1625 | HIA | HIA+ | 24 | c1ccc(cc1)C1=NCC(=O)Nc2c1cc(cc2)[N+](=O)[O-]                 |
| C1626 | HIA | HIA+ | 24 | c1cc([N+](=O)[O-])oc1/C=N/N1C(=O)NC(=O)C1                    |
| C1627 | HIA | HIA+ | 24 | c1(csc(CN(C)C)n1)CSCCN/C(=C/[N+](=O)[O-])/NC                 |
| C1628 | HIA | HIA+ | 24 | c1cc(cc2c1CC1C(C)C2(C)CCN1CC=C(C)C)O                         |
| C1629 | HIA | HIA+ | 24 | c12c(nen1C)n(c(=O)n(c2=O)CCCC(=O)C)C                         |
| C1630 | HIA | HIA+ | 24 | C(=O)(C(C)NC(C(=O)OCC)CCC)N1C(C(=O)O)CC2CCCCC12              |
| C1631 | HIA | HIA+ | 24 | c1ccc(cc1)C(C(C)N)O                                          |
| C1632 | HIA | HIA+ | 24 | c1cc(ccc1C(CNC(C)C)O)NC(=O)C                                 |
| C1633 | HIA | HIA+ | 24 | c1ccc2c(c1)N(c1ccccc1S2)CC(C)N(C)C                           |
| C1634 | HIA | HIA+ | 24 | c1ccc(cc1)CCC(=O)c1ccccc1OCC(CNCCC)O                         |
| C1635 | HIA | HIA+ | 24 | c12c(cccc1)c(ccc2)C(C(C)NC(C)C)O                             |
| C1636 | HIA | HIA+ | 24 | c1ccc2c(c1)C=Cc1ccccc1C2CCCNC                                |
| C1637 | HIA | HIA+ | 24 | c1cc(ccc1CCNC(C)C(c1ccc(cc1)O)O)O                            |
| C1638 | HIA | HIA+ | 24 | c1cc(cc(c1)OCC(CNC(C)C)O)NS(=O)(=O)C                         |
| C1639 | HIA | HIA+ | 24 | c1cc(ccc1N)S(=O)(=O)Nc1c(c(C)ns1)C                           |
| C1640 | HIA | HIA+ | 24 | c12c(cccc1)nc1c(c2N)CCCC1                                    |
| C1641 | HIA | HIA+ | 24 | c1ccc(cc1)C1=NC(C(=O)N(c2c1cc(cc2)Cl)C)O                     |
| C1642 | HIA | HIA+ | 24 | c1(c(nsn1)OCC(CNC(C)C)C)O)N1CCOCC1                           |
| C1643 | HIA | HIA+ | 24 | c12c(cccc1)n(cc2C(=O)OC1CC2CCC(C1)N2C)C                      |
| C1644 | HIA | HIA+ | 24 | c1cc(ccc1C(C1(CCCC1)O)CN(C)C)OC                              |
| C1645 | HIA | HIA+ | 24 | c1cc(ccc1c1c(CC(=O)N(CCC)CCC)n2c(ccc(c2)C)n1)C               |
| C1646 | HIA | HIA+ | 24 | c1ccc(cc1)Oc1c(cc(cc1S(=O)(=O)N)C(=O)O)NCCCC                 |
| C1647 | HIA | HIA+ | 24 | c1cc(ccc1OC(C(=O)OCC)(C)C)Cl                                 |
| C1648 | HIA | HIA+ | 24 | c1c2c(c(c(c1F)N1CC(C)NCC1)OC)n(cc(c2=O)C(=O)O)C1CC1          |
| C1649 | HIA | HIA+ | 24 | c1cc(ccc1CCOC)OCC(CNC(C)C)O                                  |
| C1650 | HIA | HIA+ | 24 | c1c[n+](c(nc1N1CCCC1)N)[O-]                                  |
| C1651 | HIA | HIA+ | 24 | C1=C2CCC3C4CCC(C(=O)C)C4(C)CCC3C2(C)CCC1=O                   |
| C1652 | HIA | HIA+ | 24 | c1cc(cc(c1)Nc1ccncc1S(=O)(=O)NC(=O)NC(C)C)C                  |
| C1653 | HIA | HIA+ | 24 | c1c(C)nc2n(c1N(CC)CC)ncn2                                    |
| C1654 | HIA | HIA+ | 24 | c1cc(cnc1)C1CCC(=O)N1C                                       |

|       |     |      |    |                                                             |
|-------|-----|------|----|-------------------------------------------------------------|
| C1655 | HIA | HIA+ | 24 | C(#N)C(c1cc(c(c1)OC)OC)OC)(CCCN(CCc1ccc(c(c1)OC)OC)C)C(C)C  |
| C1656 | HIA | HIA+ | 24 | c1ccc(ccc1C)S(=O)(=O)NC(=O)NN1CC2CCCC2C1                    |
| C1657 | HIA | HIA+ | 24 | c1ccc(cc1)C1=NC(C(=O)Nc2c1cc(cc2)Cl)O                       |
| C1658 | HIA | HIA+ | 24 | c12c(cc(cc1)F)onc2C1CCN(CCc2c(C)nc3CCCCn3c2=O)CC1           |
| C1659 | HIA | HIA+ | 24 | c1ccc(cc1)n1c(=O)cc(C)n1C                                   |
| C1660 | HIA | HIA+ | 24 | c1ccc2c(c1)N(c1cc(ccc1S2)Cl)CCCN(C)C                        |
| C1661 | HIA | HIA+ | 24 | c1c(c(cc(c1Cl)N)OC)C(=O)NC1CCN(CCCOe2ccc(cc2)F)CC1OC        |
| C1662 | HIA | HIA+ | 24 | C1=C2C(=CC3C4CCC(C(=O)C)(C4(C)CCC3C2(C)C2CC2C1=O)OC(=O)C)Cl |
| C1663 | HIA | HIA+ | 24 | c1ccc(ccc1C)S(=O)(=O)NC(=O)NC1C2CCC(C)(C2(C)C)C1O           |
| C1664 | HIA | HIA+ | 24 | c1ccc(ccc1CCNC(=O)c1ccc(ccc1OC)Cl)S(=O)(=O)NC(=O)NC1CCCCC1  |
| C1665 | HIA | HIA+ | 24 | c1ccc2c(c1)C(=O)c1ccc(ccc1OC2)CC(=O)O                       |
| C1666 | HIA | HIA+ | 24 | c1cc(c(c(c1)Cl)Cl)c1c(nc(nn1)N)N                            |
| C1667 | HIA | HIA+ | 24 | c1ccc(c(c(c1)C)NC(=O)CN(CC)CC)C                             |
| C1668 | HIA | HIA+ | 24 | c1ccc(c(c(c1)C)OCC(C)N)C                                    |
| C1669 | HIA | HIA+ | 24 | c1ccc(cc1)C1c2ccccc2CN(CCO1)C                               |
| C1670 | HIA | HIA+ | 24 | c1ccc(cc1)c1c(c2ccccc2)oc(CCC(=O)O)n1                       |
| C1671 | HIA | HIA+ | 24 | C(#N)c1c(nc(C)[nH]c1=O)NCc1ccnc1                            |
| C1672 | HIA | HIA+ | 24 | c1cc(cc(c1)OC(=O)N(CC)C)C(C)N(C)C                           |
| C1673 | HIA | HIA+ | 24 | c1cc(c2c(c1)NC(=O)C2)CC(NCCC)NCCC                           |
| C1674 | HIA | HIA+ | 24 | c1c(c(cc(c1OC)OC)S(=O)C)C                                   |
| C1675 | HIA | HIA+ | 24 | C(=O)(C(CCC)CCC)O                                           |
| C1676 | HIA | HIA+ | 24 | c1cc(ncc1Cl)N1C(=O)c2c(C1OC(=O)N1CCN(CC1)C)ncn2             |
| C1677 | HIA | HIA+ | 24 | c12c(nen1C)n(c(=O)n(c2=O)C)C                                |
| C1678 | HIA | HIA+ | 24 | c1ccc(cc1)C1=[N+](CC(=Nc2c1cc(cc2)Cl)NC)[O-]                |
| C1679 | HIA | HIA+ | 24 | c1ccc(ccc1C1CC1(C1)Cl)OC(C(=O)O)(C)C                        |
| C1680 | HIA | HIA+ | 24 | c1ccc(cc1)C1=NCC(=O)N(c2c1cc(cc2)Cl)C                       |
| C1681 | HIA | HIA+ | 24 | c1ccc2c(c1)C(=O)OC12c2ccc(cc2O)c2cc(ccc12)O)O               |
| C1682 | HIA | HIA+ | 24 | c1c2c(c(c(c1F)N1CC(C)NCC1)F)n(cc(c2=O)C(=O)O)CC             |
| C1683 | HIA | HIA+ | 24 | c1ccc(cc(c1C(Cn1cnc1)OCc1ccc(cc1Cl)Cl)Cl)Cl                 |
| C1684 | HIA | HIA+ | 24 | c1ccc(cc1)C(c1cccen1)CCN(C)C                                |
| C1685 | HIA | HIA+ | 24 | C1=CC2(C(=CC1=O)CCC1C3CCC(C(=O)CO)(C3(C)CC(C21)O)O)C        |
| C1686 | HIA | HIA+ | 24 | c1c2c(ccc1SC)ncn(/C=C/C(=O)O)c2=O                           |
| C1687 | HIA | HIA+ | 24 | c1ccc2c(c1)N(c1ccc(cc1S(=O)(=O)N2C)Cl)CCCCCCC(=O)O          |
| C1688 | HIA | HIA+ | 24 | c1ccc(c(c1)OCC)OCC1COCCN1                                   |
| C1689 | HIA | HIA+ | 24 | c1ccc(cc1)NC(=O)C                                           |
| C1690 | HIA | HIA+ | 24 | c1(NC(=O)C)nnc(s1)S(=O)(=O)N                                |
| C1691 | HIA | HIA+ | 24 | C=C1/C(=C\C=C\2/CCCC3(C)C2CCC3C(C)CCCC(C)C)/CC(CC1O)O       |
| C1692 | HIA | HIA+ | 24 | c1ccc(cc1)n1c(=N)c(c(C)n1C)N(C)C                            |
| C1693 | HIA | HIA+ | 24 | c1ccc(c(c1)OC)OCCNCC(c1ccc(cc1S(=O)(=O)N)C)O                |
| C1694 | HIA | HIA+ | 24 | C(#N)C(c1cc(cc(c1)Cn1cnc1)C(C#N)(C)C)C                      |
| C1695 | HIA | HIA+ | 24 | c1cc(ccc1c1ccc(/C=N/N2C(=O)N(C(=O)C2)CCCCN2CCN(CC2)C)o1)Cl  |
| C1696 | HIA | HIA+ | 24 | c1ccc(cc1)CC1NS(=O)(=O)c2cc(c(cc2N1)C(F)(F)F)S(=O)(=O)N     |
| C1697 | HIA | HIA+ | 24 | c1ccc(c(c1)C(=O)O)c1ccc(cc1)NC(=O)C)OC(=O)C                 |
| C1698 | HIA | HIA+ | 24 | c1ccc(cc1)CN(c1cccen1)C(CN1CCCC1)COCC(C)C                   |
| C1699 | HIA | HIA+ | 24 | c1ccc(cc1)C(=O)NCCc1ccc(cc1)OC(C(=O)O)(C)C                  |
| C1700 | HIA | HIA+ | 24 | c1ccc(cc1)C(CCN1CCCCC1)(C1CC2C=CC1C2)O                      |

|       |     |      |    |                                                                           |
|-------|-----|------|----|---------------------------------------------------------------------------|
| C1701 | HIA | HIA+ | 24 | c1ccc(cc1)C1(C(=O)OCCCN(CC)CC)CC2CCC1C2                                   |
| C1702 | HIA | HIA+ | 24 | c1ccc(cc1)C1=NC(C(=O)N(c2c1cc(cc2)Cl)C)OC(=O)N(C)C                        |
| C1703 | HIA | HIA+ | 24 | c1ccc2c(c1)C=Cc1cccc1N2C(=O)N                                             |
| C1704 | HIA | HIA+ | 24 | C(=O)(NCCCl)N(CCCl)N=O                                                    |
| C1705 | HIA | HIA+ | 24 | C(C(Cl)(Cl)Cl)(O)O                                                        |
| C1706 | HIA | HIA+ | 24 | c12c(cc(cc1)Cl)ncce2N(CCCCN(CC)CC)C                                       |
| C1707 | HIA | HIA+ | 24 | c1cc(ccc1OCC(CO)O)Cl                                                      |
| C1708 | HIA | HIA+ | 24 | C(#CCC(C)C(C#CC1C2C/C(=C\C0CC(=O)O)/CC2CC1O)O)CC                          |
| C1709 | HIA | HIA+ | 24 | C(#N)C1(c2ccc(c(c2)OC2CCCC2)OC)CCC(C(=O)O)CC1                             |
| C1710 | HIA | HIA+ | 24 | C(#N)c1ccc2c(c1)COC2(c1ccc(cc1)F)CCCN(C)C                                 |
| C1711 | HIA | HIA+ | 24 | C1=C2CCC3C4CCC(C(=O)CO)C4(C)CC(C3C2(C)CCC1=O)O                            |
| C1712 | HIA | HIA+ | 24 | c1ccc2c(c1)ccc(=O)o2                                                      |
| C1713 | HIA | HIA+ | 24 | c1c2c(cc(c1Cl)S(=O)(=O)N)S(=O)(=O)NC(CN1CCCC1)N2                          |
| C1714 | HIA | HIA+ | 24 | c1cc(c2c3c1CC1C4C=CC(C(C34CCCN1C)O2)OC(=O)C)OC(=O)C                       |
| C1715 | HIA | HIA+ | 24 | C(=O)(C1(CCCCC1)C1CCCC1)OCCN(CC)CC                                        |
| C1716 | HIA | HIA+ | 24 | c1cc(ccc1CCN(CCOc1ccc(cc1)NS(=O)(=O)C)C)NS(=O)(=O)C                       |
| C1717 | HIA | HIA+ | 24 | c12c(cc(c(c1)OC)OC)nc(nc2N)N1CCN(C(=O)C2COc3cccc3O2)CC1                   |
| C1718 | HIA | HIA+ | 24 | C#CC1(CCC2C3CCc4cc(ccc4C3CCC12C)O)O                                       |
| C1719 | HIA | HIA+ | 24 | CCO                                                                       |
| C1720 | HIA | HIA+ | 24 | C#CC1(CCC2C3CCC4=CC(CCC4C3CCC12C)OC(=O)C)OC(=O)C                          |
| C1721 | HIA | HIA+ | 24 | c1ccc(c(c1)CC(=O)O)Oc1ccc(cc1Cl)Cl                                        |
| C1722 | HIA | HIA+ | 24 | C1=CC2(C)C3CCC4(C)C(C(=O)NC(C)(C)C)CCC4C3CCC2NC1=O                        |
| C1723 | HIA | HIA+ | 24 | c1(c[nH]c(=O)nc1N)F                                                       |
| C1724 | HIA | HIA+ | 24 | c1ccc2c(c1)/C(=C\CCN1CCN(CC1)CCO)/c1cc(ccc1S2)C(F)(F)F                    |
| C1725 | HIA | HIA+ | 24 | c12c(cccc1)n(c(c2c1ccc(cc1)F)/C=C/C(CC(CC(=O)O)O)O)C(C)C                  |
| C1726 | HIA | HIA+ | 24 | C(=C(C)C)CC/C(=C\1/C2CC(C3C4(C)CCC(C(C)C4CCC3(C)C2(C)CC1OC(=O)C)O)/C(=O)O |
| C1727 | HIA | HIA+ | 24 | c1cc(cc(c1C(C)S(=O)(=O)C)(Cn1cncn1)O)F)F                                  |
| C1728 | HIA | HIA+ | 24 | c1cc(ccc1CCNC(=O)c1cnc(cn1)C)S(=O)(=O)NC(=O)NC1CCCCC1                     |
| C1729 | HIA | HIA+ | 24 | c12c(cccc1)n(C)nc2C(=O)NC1CC2CCCC(C1)N2C                                  |
| C1730 | HIA | HIA+ | 24 | c1cc(cc(c1)Cl)C1(CCN(CCCC(=O)c2ccc(cc2)F)CC1)O                            |
| C1731 | HIA | HIA+ | 24 | c12c(cccc1)c(nnc2)NN                                                      |
| C1732 | HIA | HIA+ | 24 | c1ccc2c(c1)C(=O)N(c1ccc(cc1)C(C(=O)O)CC)C2                                |
| C1733 | HIA | HIA+ | 24 | c12c(ccc(c1)OC)n(cc2CC(=O)O)C(=O)c1cccc1                                  |
| C1734 | HIA | HIA+ | 24 | c1ccc(c(c1)c1ccc(cc1)CN1C(=NC2(C1=O)CCCC2)CCCC)c1n[nH]nn1                 |
| C1735 | HIA | HIA+ | 24 | C1(C2C(C(CO2)O[N+](=O)[O-])OC1)O                                          |
| C1736 | HIA | HIA+ | 24 | c1ccc2c(c1)C(=C(C(=O)Nc1cc(C)on1)C(C)S2(=O)=O)O                           |
| C1737 | HIA | HIA+ | 24 | c1ccc2c(c1)c(=O)n(c(=O)[nH]2)CCN1CCC(C(=O)c2ccc(cc2)F)CC1                 |
| C1738 | HIA | HIA+ | 24 | C(#N)c1ccc(cc1)C(c1ccc(C#N)cc1)n1cncn1                                    |
| C1739 | HIA | HIA+ | 24 | C(=O)(C(CC)N1C(=O)CCC1)N                                                  |
| C1740 | HIA | HIA+ | 24 | c1cc2c(c(c1)OCC(CNC(C)(C)C)O)CCCC2=O                                      |
| C1741 | HIA | HIA+ | 24 | C#CC1(CCC2C3CCC4=CC(=O)CCC4C3CCC12CC)O                                    |
| C1742 | HIA | HIA+ | 24 | c12c3cccc1C1=CC(CN(C1C2c[nH]3)C)NC(=O)N(CC)CC                             |
| C1743 | HIA | HIA+ | 24 | c1ccc(c(c1)C1=NC(C(=O)N(c2c1cc(cc2)Cl)C)O)Cl                              |
| C1744 | HIA | HIA+ | 24 | c1ccnc(c1)NC(=O)C1=C(c2c(cc(s2)Cl)S(=O)(=O)N1C)O                          |
| C1745 | HIA | HIA+ | 24 | C#CC1(CCC2C3CCC4=CCCC4C3CCC12C)O                                          |
| C1746 | HIA | HIA+ | 24 | c1ccc(c(c1)C(=O)O)Nc1c(ccc(c1Cl)C)Cl                                      |

|       |     |      |    |                                                                  |
|-------|-----|------|----|------------------------------------------------------------------|
| C1747 | HIA | HIA+ | 24 | C1=C2C(=CC3C4CCC(C(=O)C)(C4(C)CCC3C2(C)CCC1=O)OC(=O)C)C          |
| C1748 | HIA | HIA+ | 24 | c1ccc(cc1)OC1(CC)CCCCN(C1)C                                      |
| C1749 | HIA | HIA+ | 24 | c1ccc(cc1)C1(C(=O)N(C(=O)C1)C)C                                  |
| C1750 | HIA | HIA+ | 24 | c12e3cccc1C1=CC(C(=O)NC(CC)CO)CN(C1Cc2cn3C)C                     |
| C1751 | HIA | HIA+ | 24 | c1ccc(c1)C1=NCc2n(c3c1cc(cc3)Cl)c(nc2)CF                         |
| C1752 | HIA | HIA+ | 24 | c1ccc(c2c3c1CC1C4(CCC(C(C34CCN1CC1CCC1)O2)O)O)O                  |
| C1753 | HIA | HIA+ | 24 | c1ccc(nc1)C(=O)NCCO[N+](=O)[O-]                                  |
| C1754 | HIA | HIA+ | 24 | c1ccc(nc1)C1CCCN1C                                               |
| C1755 | HIA | HIA+ | 24 | C(#N)C1=C(C(=O)OC)C(c2cccc(c2)[N+](=O)[O-])C(=C(C)N1)C(=O)OC(C)C |
| C1756 | HIA | HIA+ | 24 | c12c(c(ccc1[N+](=O)[O-])O)nccc2                                  |
| C1757 | HIA | HIA+ | 24 | C#CC1(CCC2C3CCC4=CC(=O)CCC4C3CCC12C)O                            |
| C1758 | HIA | HIA+ | 24 | C#CC1(CCC2C3CCC4=C/C(=N/O)/CCC4C3CCC12CC)OC(=O)C                 |
| C1759 | HIA | HIA+ | 24 | c1ccc2c(c1)C(=CCNC)c1cccc1CC2                                    |
| C1760 | HIA | HIA+ | 24 | c1c2c3c(c1F)N1CCN(CC1)C)OCC(C)n3cc(c2=O)C(=O)O                   |
| C1761 | HIA | HIA+ | 24 | c12c(ccc1)n(c1c2C(=O)C(CC1)Cn1ccnc1)C                            |
| C1762 | HIA | HIA+ | 24 | c1ccc(cc1)C(c1cccc1C)OCCN(C)C                                    |
| C1763 | HIA | HIA+ | 24 | c1ccc2c(c1)C(=N)Cc1cccc1N2C(=O)N                                 |
| C1764 | HIA | HIA+ | 24 | C(#CCOC(=O)C(c1cccc1)(C1CCCC1)O)CN(CC)CC                         |
| C1765 | HIA | HIA+ | 24 | C1(C(=O)N(c2cccc2)N(c2ccc(cc2)O)C1=O)CCCC                        |
| C1766 | HIA | HIA+ | 24 | c1cc(ccc1C1CCNCC1COc1ccc2c(c1)OCO2)F                             |
| C1767 | HIA | HIA+ | 24 | C1(=O)C(C(=O)NC(=O)N1)(CC)C(C)CCC                                |
| C1768 | HIA | HIA+ | 24 | c1ccc2c(c1)N(c1cc(ccc1S2)Cl)CCCN1CCN(CC1)CCO                     |
| C1769 | HIA | HIA+ | 24 | c1ccc(cc1)C1(C(=O)NC(=O)CC1)CCN(CC)CC                            |
| C1770 | HIA | HIA+ | 24 | C1(c2cccc2)C(=O)c2cccc2C1=O                                      |
| C1771 | HIA | HIA+ | 24 | c1ccc2c(c1)C(=C(C(=O)Nc1cccc1)N(C)S2(=O)=O)O                     |
| C1772 | HIA | HIA+ | 24 | c1c2c(cc(c1Cl)S(=O)(=O)N)S(=O)(=O)N(C(CSCC(F)(F)F)N2)C           |
| C1773 | HIA | HIA+ | 24 | c1cc(ccc1C(=O)O)S(=O)(=O)N(CCC)CCC                               |
| C1774 | HIA | HIA+ | 24 | c1cc(ccc1C(=O)NC(C)C)CNNC                                        |
| C1775 | HIA | HIA+ | 24 | c1ccc(c(c1)C(C)C)OC(C)C                                          |
| C1776 | HIA | HIA+ | 24 | c12c(nen1CC(C)O)n(c(=O)n(c2=O)C)C                                |
| C1777 | HIA | HIA+ | 24 | c1ccc(cc1)C(C(C)NC)O                                             |
| C1778 | HIA | HIA+ | 24 | c1cnc(en1)C(=O)N                                                 |
| C1779 | HIA | HIA+ | 24 | c1ccc(c(c1OC)C(=O)NCC1CCCN1CC)OC)Br                              |
| C1780 | HIA | HIA+ | 24 | c1ccc(c(c1)C(=O)O)OC(=O)c1cccc1O                                 |
| C1781 | HIA | HIA+ | 24 | C#CCN(C(C)Cc1cccc1)C                                             |
| C1782 | HIA | HIA+ | 24 | c1ccc2c(c1)C(=C(C(=O)Nc1nccs1)N(C)S2(=O)=O)O                     |
| C1783 | HIA | HIA+ | 24 | c1cc(ccc1N)S(=O)(=O)Nc1cc(C)on1                                  |
| C1784 | HIA | HIA+ | 24 | C1(C(=O)N(c2cccc2)N(c2cccc2)C1=O)CCS(=O)c1cccc1                  |
| C1785 | HIA | HIA+ | 24 | c1ccc(cc1)/C(=C(/c1cccc1)\CC)/c1ccc(cc1)OCCN(C)C                 |
| C1786 | HIA | HIA+ | 24 | c1cnc(c1)NC(=O)C1=Cc2c(ccs2)S(=O)(=O)N1C                         |
| C1787 | HIA | HIA+ | 24 | c1ccc(cc1)C(c1cccc1)(C1CCN(CCCC(c2ccc(cc2)C(C)(C)C)O)CC1)O       |
| C1788 | HIA | HIA+ | 24 | c1cc(ccc1CC(C(=O)O)OCC)OCCc1ccc(cc1)OS(=O)(=O)C                  |
| C1789 | HIA | HIA+ | 24 | C1=C2CCC3C4CCC(C4(C)CCC3C2(C)CCC1=O)O                            |
| C1790 | HIA | HIA+ | 24 | c1c([N+](=O)[O-])n(c(C)n1)CCS(=O)(=O)CC                          |
| C1791 | HIA | HIA+ | 24 | c1ccc(c(c1)C)NC(=O)C(C)N)C                                       |
| C1792 | HIA | HIA+ | 24 | c1ccc(cc1)/C(=C(/c1cccc1)\CCCl)/c1ccc(cc1)OCCN(C)C               |



|       |     |      |    |                                                                                                                       |
|-------|-----|------|----|-----------------------------------------------------------------------------------------------------------------------|
| C1793 | HIA | HIA+ | 24 | <chem>C1=CC2(C(=CC1=O)CCC1C3CC(C(C(=O)CO)(C3(C)CC(C21F)O)O)O)C</chem>                                                 |
| C1794 | HIA | HIA+ | 24 | <chem>c1ccc(cc1)C(CCN1CCCC1)(C1CCCC1)O</chem>                                                                         |
| C1795 | HIA | HIA+ | 24 | <chem>C1CN(CCC1)P(=O)(N(CCC1)CC1)OC1</chem>                                                                           |
| C1796 | HIA | HIA+ | 24 | <chem>c12e(cccc1)sc(c2)C(C)N(C(=O)N)O</chem>                                                                          |
| C1797 | HIA | HIA+ | 24 | <chem>c1cc(ccc1C(=O)c1c(cc(CC(=O)O)n1C)C)Cl</chem>                                                                    |
| C1798 | HIA | HIA+ | 24 | <chem>c12c(cccc1)onc2CS(=O)(=O)N</chem>                                                                               |
| C1799 | HIA | HIA+ | 24 | <chem>c1ccc2c(c1)C=C(c1cc(ccc1S2)Cl)OCCN(C)C</chem>                                                                   |
| C1800 | HIA | HIA- | 24 | <chem>c1ccc2e(c1)C13CC[N+](C1CC(/C(=C/CO)/C4)C1=CN4e5ccccc5C56CC[N+](C5CC(/C(=C/CO)/C7)C(=CN2C31)C46)CC=C)CC=C</chem> |
| C1801 | HIA | HIA- | 24 | <chem>c1cc[n+](cc1)CC1=C(C(=O)O)N2C(=O)C(C2SC1)NC(=O)/C(=N\OC)/c1csc(n1)N</chem>                                      |
| C1802 | HIA | HIA- | 24 | <chem>c1cc[n+](cc1)CC1=C(C(=O)O)N2C(=O)C(C2SC1)NC(=O)/C(=N\OC(C(=O)O)(C)C)/c1csc(n1)N</chem>                          |
| C1803 | HIA | HIA- | 24 | <chem>c1cc(cc(c1)O)[N+](CC)(C)C</chem>                                                                                |
| C1804 | HIA | HIA- | 24 | <chem>C(=O)(C)OC1C2(C)CCC3C(CCC4CC(C(CC34C)[N+](C3)CCCC3)C)OC(=O)C2CC1[N+](C)CCCC1)C</chem>                           |
| C1805 | HIA | HIA- | 24 | <chem>c1cc(e2cc1CC1c3e(cc(c3O3ccc(cc3)CC3c4cc(e(cc4CC[N+](C)C)OC)O2)O)OC)CC[N+](C)C)O</chem>                          |
| C1806 | HIA | HIA- | 24 | <chem>C(=O)(C)OC1C2(C)CCC3C(CCC4CC(C(CC34C)N3CCCC3)OC(=O)C)C2CC1[N+](C)CCCC1)C</chem>                                 |
| C1807 | HIA | HIA- | 24 | <chem>c1cc(cc(c1)OC(=O)N(C)C)[N+](C)(C)C</chem>                                                                       |
| C1808 | HIA | HIA- | 24 | <chem>c1ccc(cc1)C[N+](CCOe1ccccc1)(C)C</chem>                                                                         |
| C1809 | HIA | HIA- | 24 | <chem>C(=O)(N)OC(C)C[N+](C)(C)C</chem>                                                                                |
| C1810 | HIA | HIA- | 24 | <chem>c1cc(c(c1)OCC[N+](CC)(CC)OCC[N+](CC)(CC)OCC[N+](CC)(CC)CC</chem>                                                |
| C1811 | HIA | HIA- | 24 | <chem>c1c(cc[n+](c1)COC[n+](c1)C)C=C/N/O/C=N/O</chem>                                                                 |
| C1812 | HIA | HIA- | 24 | <chem>C(CC[N+](C)CCCC1)C(CC[N+](C)CCCC1)C</chem>                                                                      |
| C1813 | HIA | HIA- | 24 | <chem>c1ccc(cc1)C(=C1CC[N+](CC1)(C)C)c1ccccc1</chem>                                                                  |
| C1814 | HIA | HIA- | 24 | <chem>C(=O)(CC(C[N+](C)C)C)OC(=O)C)O</chem>                                                                           |
| C1815 | HIA | HIA- | 24 | <chem>c1ccc(cc1)C(C(=O)OC1CC2C3C(C(C1)[N+](C)C)O3)CO</chem>                                                           |
| C1816 | HIA | HIA- | 24 | <chem>c1ccc(cc1)C(C(=O)OC1CC[N+](C1)(C)C)(C1CCCC1)O</chem>                                                            |
| C1817 | HIA | HIA- | 24 | <chem>c1ccc(c(c1)C[N+](CC)(C)C)Br</chem>                                                                              |
| C1818 | HIA | HIA- | 24 | <chem>c1cc[n+](c(c1)/C=N/O)C</chem>                                                                                   |
| C1819 | HIA | HIA+ | 24 | <chem>c1c(c(c(c(c1OC)C)C)/C=C/C(=C/C=C/C(=C\C(=O)O)/C)/C)C</chem>                                                     |
| C1820 | HIA | HIA+ | 24 | <chem>c1ccc(cc1)C1=NCe2n(c3c1cc(cc3)Cl)c(C)nn2</chem>                                                                 |
| C1821 | HIA | HIA+ | 24 | <chem>c1cc(ccc1C1(C(=O)NC(=O)CC1)CC)N</chem>                                                                          |
| C1822 | HIA | HIA+ | 24 | <chem>c1ccc2c(c1)C(=O)N(C1CCCN(CC1)C)NC2Cc1ccc(cc1)Cl</chem>                                                          |
| C1823 | HIA | HIA+ | 24 | <chem>c1ccnc(c1)CCNC</chem>                                                                                           |
| C1824 | HIA | HIA+ | 24 | <chem>C(#N)c1ccc(cc1C(F)(F)F)NC(=O)C(C)(CS(=O)(=O)c1ccc(cc1)F)O</chem>                                                |
| C1825 | HIA | HIA+ | 24 | <chem>c1ccc(cc1)Cc1ccccc1OCCCCNC</chem>                                                                               |
| C1826 | HIA | HIA+ | 24 | <chem>c1(cn(c(=O)nc1NC(=O)OCCCC)C1C(C(C(C)O1)O)O)F</chem>                                                             |
| C1827 | HIA | HIA+ | 24 | <chem>c1cc(ccc1C(C(CO)NC(=O)C(C)C)O)[N+](=O)[O-]</chem>                                                               |
| C1828 | HIA | HIA+ | 24 | <chem>c12e(cccc1)nc2C(C1CC2CCN1CC2C=C)O</chem>                                                                        |
| C1829 | HIA | HIA+ | 24 | <chem>c1e2c(cc3e1OCCO3)n(CC)nc(c2=O)C(=O)O</chem>                                                                     |
| C1830 | HIA | HIA+ | 24 | <chem>C1C(=O)N(c2ccccc2)c2cc(ccc2N(C1=O)C)Cl</chem>                                                                   |
| C1831 | HIA | HIA+ | 24 | <chem>c1cc(e2c3e1CC1C4C=CC(C(C34CCN1C)O2)O)OC</chem>                                                                  |
| C1832 | HIA | HIA+ | 24 | <chem>c1ccc2c(c1)C=Cc1ccccc1C2=C1CCN(CC1)C</chem>                                                                     |
| C1833 | HIA | HIA+ | 24 | <chem>CCCC(CCC)CCCC1COCCN1CCO</chem>                                                                                  |
| C1834 | HIA | HIA+ | 24 | <chem>c1ccc2e(c1)CCc1ccccc1N2CCCN</chem>                                                                              |
| C1835 | HIA | HIA+ | 24 | <chem>c1ccc(cc1)C1=NCC(=O)Nc2c1cc(cc2)Cl</chem>                                                                       |
| C1836 | HIA | HIA+ | 24 | <chem>C#CC1(CCC2C3CCC4=CCCC4C3C(=C)CC12CC)O</chem>                                                                    |
| C1837 | HIA | HIA+ | 24 | <chem>c1ccc(cc1)C(c1ccccc1)(C(=O)N1CCCC1)C(C)CN1CCOCC1</chem>                                                         |
| C1838 | HIA | HIA+ | 24 | <chem>c1cc(cc2c1N=C(C)NS2(=O)=O)Cl</chem>                                                                             |

|       |     |      |    |                                                                                                |
|-------|-----|------|----|------------------------------------------------------------------------------------------------|
| C1839 | HIA | HIA+ | 24 | c1ccc(c(e1)CC(=O)O)Nc1ccc(cc1Cl)Cl                                                             |
| C1840 | HIA | HIA+ | 24 | C(#N)CC1(CCC2C3C(=C4C(=CC(=O)CC4)CC3)CCC12C)O                                                  |
| C1841 | HIA | HIA+ | 24 | c1ccc2c(c1)C(c1ccccc1OC2)CCCN(C)C                                                              |
| C1842 | HIA | HIA+ | 24 | C1(=O)C(C)CC(C)(C(C)C(C(C(=O)OC(C)C(C(C1C)O)O)C)OC1CC(C)(C(C(C)O1)O)OC)OC1C(C(C(C)O1)N(C)C)O)O |
| C1843 | HIA | HIA+ | 24 | c1cc(cc2c1C1CCC3(C)C(CCC3O)C1CC2)OC(=O)N(CCC1)CCCC1                                            |
| C1844 | HIA | HIA+ | 24 | CCC(CO)NCCNC(C)CO                                                                              |
| C1845 | HIA | HIA+ | 24 | c1c(cc(CC)nc1)C(=S)N                                                                           |
| C1846 | HIA | HIA+ | 24 | c1cc(ccc1c1cc(c[n+](c1c1ccc(C)nc1)[O-])Cl)S(=O)(=O)C                                           |
| C1847 | HIA | HIA+ | 24 | c1cc(cc(e1)C(F)(F)F)C(C)CNCC                                                                   |
| C1848 | HIA | HIA+ | 24 | c1ccc(cc1)Oc1cccc(c1)C(C(=O)O)C                                                                |
| C1849 | HIA | HIA+ | 24 | C1=CC2(C(=CC1=O)C(CC1C3CC4C(C(=O)CO)(C3(C)CC(C21)O)OC(C)(C)O4)F)C                              |
| C1850 | HIA | HIA+ | 24 | c1ccc(c(e1)C1=NCC(=O)N(e2c1cc(cc2)Cl)CCN(CC)CC)F                                               |
| C1851 | HIA | HIA+ | 24 | C#CC1(C=CC2C3CCC4=CC(=O)CCC4C3CCC12CC)O                                                        |
| C1852 | HIA | HIA+ | 24 | c1cc(c(e1)Cl)CC(=O)N=C(N)N)Cl                                                                  |
| C1853 | HIA | HIA+ | 24 | c1c2c(cc(e1Cl)S(=O)(=O)N)S(=O)(=O)NCN2                                                         |
| C1854 | HIA | HIA+ | 24 | c12c(cc(cc1)Cl)ncce2NC(C)CCN(CC)CCO                                                            |
| C1855 | HIA | HIA+ | 24 | c1ccc2c(c1)CCc1cccc1N2CCCN(C)C                                                                 |
| C1856 | HIA | HIA+ | 24 | c1ccc2c(c1)C(=O)N(c1ccc(cc1)C(C(=O)O)C)C2                                                      |
| C1857 | HIA | HIA+ | 24 | c1ccc(cc1)C12c3cc(ccc3N(C(=O)CN1C(=O)C=C(C)O2)C)Cl                                             |
| C1858 | HIA | HIA+ | 24 | c1ccc(cc1)CCC(C)NCC(c1ccc(c(e1)C(=O)N)O)O                                                      |
| C1859 | HIA | HIA+ | 24 | C(#N)C(=NNc1ccc(cc1)C1=NNC(=O)CC1C)C#N                                                         |
| C1860 | HIA | HIA+ | 24 | c1c(c(ccc1N1C(=O)OC(CNC(=O)C)C1)N1CCOCC1)F                                                     |
| C1861 | HIA | HIA+ | 24 | c1ccc(c(e1)c1ccc(cc1)Cn1c(c(nc1CCCC)Cl)CO)c1[nH]nnn1                                           |
| C1862 | HIA | HIA+ | 24 | c1ccc2c(c1)C1c3ccccc3C2(CC1)CCNC                                                               |
| C1863 | HIA | HIA+ | 24 | c12c(ccc(c1)C(=O)c1cccc1)nc([nH]2)NC(=O)OC                                                     |
| C1864 | HIA | HIA+ | 24 | C#CC1(CCC2C3CCc4cc(ccc4C3CCC12C)OC)O                                                           |
| C1865 | HIA | HIA+ | 24 | c1ccc(c(e1)OC)OCC(COC(=O)N)O                                                                   |
| C1866 | HIA | HIA+ | 24 | c1ccc(c(e1)C)N1C(=O)e2cc(c(cc2NC1C)Cl)S(=O)(=O)N                                               |
| C1867 | HIA | HIA+ | 24 | c1cc(cnc1)C(=O)C(c1ccnc1)(C)C                                                                  |
| C1868 | HIA | HIA+ | 24 | c1cc(ccc1C(=O)NCCN1CCOCC1)Cl                                                                   |
| C1869 | HIA | HIA- | 24 | c1cc(ccc1C(C(=O)NC1(C(=O)N2C(=C(COC12)CSc1nnn1C)C(=O)O)OC)C(=O)O)O                             |
| C1870 | HIA | HIA+ | 24 | c12c(cccc1)cc(cc2)CC(C(=O)OCCN(CC)CC)CC1CCCCO1                                                 |
| C1871 | HIA | HIA+ | 24 | c12c(ccc(c1)C(C(=O)O)C)cc(cc2)OC                                                               |
| C1872 | HIA | HIA+ | 24 | c12c(ccc(c1)CCS(=O)(=O)NC)[nH]c(c2)C1CCN(CC1)C                                                 |
| C1873 | HIA | HIA+ | 24 | c1ccc(c(e1)C1C(=C(C)NC(=C1OC(=O)C)C)C(=O)OC)[N+](=O)[O-]                                       |
| C1874 | HIA | HIA+ | 24 | c1c(c(ccc1N1C(=O)C(C)(C)NC1=O)[N+](=O)[O-])C(F)(F)F                                            |
| C1875 | HIA | HIA+ | 24 | C#CC1(CCC2C3CCC4=CC(=O)CCC4C3C=CC12CC)O                                                        |
| C1876 | HIA | HIA+ | 24 | c1ccc(cc1)C(c1ccccc1)N1CCN(CCCn2c3ccccc3[nH]e2=O)CC1                                           |
| C1877 | HIA | HIA+ | 24 | c1ccc(c(e1)OCC=C)OCC(CNC(C)C)O                                                                 |
| C1878 | HIA | HIA+ | 24 | c1ccc(c(e1)C1CCCC1)OCC(CNC(C)(C)C)O                                                            |
| C1879 | HIA | HIA+ | 24 | c1ccc(cc1)C1(C(=O)NC(=O)NC1=O)CC                                                               |
| C1880 | HIA | HIA+ | 24 | c1ccc(cc1)C(c1c(c2ccccc2oc1=O)O)CC                                                             |
| C1881 | HIA | HIA+ | 24 | c1ccc(cc1)N1C(=O)C(=O)C(CCCC)N1c1ccccc1                                                        |
| C1882 | HIA | HIA+ | 24 | c12c(cccc1OCC(CNC(C)C)O)[nH]cc2                                                                |
| C1883 | HIA | HIA+ | 24 | c1c(ccnc1)C(=O)c1c(CC)[nH]c(=O)[nH]1                                                           |
| C1884 | HIA | HIA+ | 24 | c1ccc2c(c1)C(=C1CCN(CC1)C)c1ccsc1CC2                                                           |

|       |     |      |                |                                                                                                                     |
|-------|-----|------|----------------|---------------------------------------------------------------------------------------------------------------------|
| C1885 | HIA | HIA+ | 24             | c1ccc2c(c1)CCN1C(=O)CN(C(=O)C3CCCC3)CC21                                                                            |
| C1886 | HIA | HIA+ | 24             | c1ccc(cc1)C(CCN1CCCC1)(C1CCCC1)O                                                                                    |
| C1887 | HIA | HIA+ | 24             | c1ccc(cc1)C(c1ccc1)(C(=O)OC1CCN(CC1)C)OCCC                                                                          |
| C1888 | HIA | HIA+ | 24             | c1c(CCC)[nH]c(=S)[nH]c1=O                                                                                           |
| C1889 | HIA | HIA+ | 24             | c1cc2c(c(c1)O)CC1CC(CN(C1C2)CCC)NS(=O)(=O)N(CC)CC                                                                   |
| C1890 | HIA | HIA+ | 24             | c1c(cc(cc1O)O)C(CNCCCn1c2c(nc1)n(c(=O)n(c2=O)C)C)O                                                                  |
| C1891 | HIA | HIA+ | 24             | c12c(ccc(c1)Cn1cncn1)[nH]cc2CCN(C)C                                                                                 |
| C1892 | HIA | HIA+ | 24             | c1ccc2c(c1)C(=O)NS2(=O)=O                                                                                           |
| C1893 | HIA | HIA+ | 24             | C(=C\Br)/C1C(=O)NC(=O)N(C1)C1C(C(C(CO)O1)O)O                                                                        |
| C1894 | HIA | HIA+ | 24             | C1=CC(n2cc(c(nc2=O)N)C)OC1CO                                                                                        |
| C1895 | HIA | HIA+ | 24             | c1cc(ccc1N)S(=O)(=O)Nc1nc(cc(C)n1)C                                                                                 |
| C1896 | HIA | HIA+ | 24             | c1ccc(c(c1)OCC)OCCNC(C)Cc1ccc(c(c1)S(=O)(=O)N)OC                                                                    |
| C1897 | HIA | HIA+ | 24             | c12c(cccc1)n(c(C1C=c3c(=C(C)C1)nc(CCC)n3Cc1ccc(cc1)c1ccccc1C(=O)O)n2)C                                              |
| C1898 | HIA | HIA+ | 24             | c1c2c(cc(c1OC)OC)C1CC(=O)C(CC(C)C)CN1CC2                                                                            |
| C1899 | HIA | HIA+ | 24             | c1cc(ccc1C)S(=O)(=O)NC(=O)NCCCC                                                                                     |
| C1900 | HIA | HIA+ | 24             | c1cc(ccc1C)C(=O)c1ccc(CC(=O)O)n1C                                                                                   |
| C1901 | HIA | HIA+ | 24             | CC1(C)OC2C(COC3(C2OC(C)(C)O3)COS(=O)(=O)N)O1                                                                        |
| C1902 | HIA | HIA+ | 24             | c1cc(cc(c1)OC)C1(CCCCC1CN(C)C)O                                                                                     |
| C1903 | HIA | HIA+ | 24             | C(=O)(C1CCC(CC1)CN)O                                                                                                |
| C1904 | HIA | HIA+ | 24             | c1cc(cc(c1)Cl)N1CCN(CCCn2c(=O)n3ccccc3n2)CC1                                                                        |
| C1905 | HIA | HIA+ | 24             | c1c(cc(c(c1OC)OC)OC)Cc1enc(nc1N)N                                                                                   |
| C1906 | HIA | HIA+ | 24             | c1cc(ccc1C(C(=O)O)C)C1C/C(=N/O)/CCCC1                                                                               |
| C1907 | HIA | HIA+ | 24             | C(#N)c1c2n(c(ccn2)c2cccc(c2)N(C(=O)C)CC)nc1                                                                         |
| C1908 | HIA | HIA- | 24             | C1=C(C(=O)O)OC(C1NC(=N)N)NC(=O)C)C(C(CO)O)O                                                                         |
| C1909 | HIA | HIA- | 18             | CN(C)C(=O)Oe1ccc[n+](C)c1                                                                                           |
| C1910 | HIA | HIA+ | 14             | CCN1CCC[C@@H]1CNC(=O)c1c(OC)ccc(c1)S(=O)(=O)CC                                                                      |
| C1911 | HIA | HIA+ | 14             | Cc1cn([C@@H]2O[C@@H](CO)C=C2)c(=O)[nH]c1=O                                                                          |
| C1912 | HIA | HIA- | 15,22          | OC[C@H]1O[C@H](O[C@@H]2[C@@H](O)[C@H](O)[C@H]3O[C@H](CN)[C@@H](O)[C@H](O)[C@H]3O)[C@@H](N)CC2N)[C@H](O)[C@@H](N)C1O |
| C1913 | HIA | HIA+ | 14,20          | Nc1ccc(cc1)S(=O)(=O)Nc1ccc1                                                                                         |
| C1914 | HIA | HIA+ | 15,18,21,22    | COc1ccc(CCN(C)CCCC(C#N)(C(C)C)c2cc(OC)c(OC)cc2)cc1OC                                                                |
| C1915 | HIA | HIA+ | 20             | C(=C\CN1CCN(CC1)C(c1ccc(F)cc1)c1ccc(F)cc1)/c1ccccc1                                                                 |
| C1916 | HIA | HIA+ | 15,16,19,22    | CC(NC(C)(C)C)C(=O)c1ccccc1)c1                                                                                       |
| C1917 | HIA | HIA+ | 18             | CN(C)CCC(c1ccc(Cl)cc1)c1ccccc1                                                                                      |
| C1918 | HIA | HIA+ | 20             | ON1C(=c2cc(Cl)ccc2=N/C(=N\C)/C1)c1ccccc1                                                                            |
| C1919 | HIA | HIA- | 15             | NC(=S)N/N=C/c1ccc(NC(=O)C)cc1                                                                                       |
| C1920 | HIA | HIA+ | 20             | N/C(=N\C(C)C)/N=C(\N)/Nc1ccc(Cl)cc1                                                                                 |
| C1921 | HIA | HIA+ | 15,16,18,19,22 | OCC(C(=O)OC1C[C@@H]2N(C)[C@@H](C1)[C@@H]1O[C@H]21)c1ccccc1                                                          |
| C1922 | HIA | HIA+ | 15,22          | COc1cc2c(cc1)nc([nH]2)S(=O)Cc1ccc(C)c(OC)c1C                                                                        |
| C1923 | HIA | HIA+ | 15             | O/C(=C\1/N(C)S(=O)(=O)c2ccccc2C1=O)/Nc1ncs1                                                                         |
| C1924 | HIA | HIA+ | 14,15          | COc1cc(ccc1)[C@@]1(O)CCCC[C@@H]1CN(C)C                                                                              |
| C1925 | HIA | HIA+ | 14             | CC(C)[C@H](N)C(=O)OCCOCn1cnc2c1[nH]c(N)nc2=O                                                                        |
| C1926 | HIA | HIA+ | 15,22          | OC1=C(O)C(=O)[C@H](O1)[C@@H](O)CO                                                                                   |
| C1927 | HIA | HIA- | 14,22          | CC(=O)N(O)CCCCCN(C(=O)CCC(=O)N(O)CCCCCN(C(=O)CCC(=O)N(O)CCCCCN                                                      |
| C1928 | HIA | HIA+ | 14             | CC(C)(C)NC[C@H](O)c1cc(CO)c(O)cc1                                                                                   |
| C1929 | HIA | HIA+ | 15,16,19       | NCC1(CC(=O)O)CCCC1                                                                                                  |
| C1930 | HIA | HIA+ | 14,20          | CCCN(CCC)CCc1c2CC(=O)Nc2ccc1                                                                                        |

|       |     |      |                 |                                                                                                                                                        |
|-------|-----|------|-----------------|--------------------------------------------------------------------------------------------------------------------------------------------------------|
| C1931 | HIA | HIA+ | 20              | OC(=O)[C@@H]1N2C(=O)[C@@H](NC(=O)c3c(oc3c3c(F)cccc3Cl)C)[C@H]2SC1(C)C                                                                                  |
| C1932 | HIA | HIA- | 23,15,16,19,21  | OC(=O)C1=C/C(=N\Nc2cc(C(=O)O)c(O)cc2)/C=CC1=O                                                                                                          |
| C1933 | HIA | HIA+ | 15,16,19        | OC(=O)C1=C(CSc2n[nH]nc2)CS[C@H]2N1C(=O)[C@H]2NC(=O)C(N)c1ccc(O)cc1                                                                                     |
| C1934 | HIA | HIA- | 17              | oc[C@H]1o[C@@H](O[C@@H]2[C@@H](O)[C@H](N)C[C@H](N)[C@H]2O[C@H]2O[C@H](CO)[C@@H](O)[C@H](O)[C@H]2N)[C@H](O)C1O[C@H]1O[C@@H](CN)[C@@H](O)[C@H](O)[C@H]1N |
| C1935 | HIA | HIA+ | 5,16,18,19,21,2 | [C@@H]12C[C@@H](C)[C@](O)(C(=O)CO)[C@@]1(C)C[C@H](O)[C@@]1(F)[C@H]2CCC2=CC(=O)C=C[C@@]12C                                                              |
| C1936 | HIA | HIA+ | 15,22           | C1=C2C(=C[C@H]3[C@@H]4CC[C@](OC(=O)C)(C(=O)C)[C@@]4(C)CC[C@@H]3[C@@]2(C)[C@H]2C[C@H]2C1=O)C1                                                           |
| C1937 | HIA | HIA+ | 15,18,22        | Oc1c2O[C@H]3C(=O)CC[C@@]4(O)[C@H]5Cc(cc1)c2[C@@]34CCN5CC=C                                                                                             |
| C1938 | HIA | HIA- | 15,21,22        | OC(=O)C1=C(CSc2nc(=O)c(=O)[nH]n2C)CS[C@H]2N1C(=O)[C@H]2NC(=O)/C(=NOC)/c1csc(n1)N                                                                       |
| C1939 | HIA | HIA- | 16,19,22        | O[C@H]1[C@@H](O[C@@H]2[C@@H](O)[C@H](O[C@H]3O[C@H](CN)CC[C@H]3N)[C@@H](N)CC2N)OC[C@@](O)(C)[C@@H]1NC                                                   |
| C1940 | HIA | HIA+ | 14,20           | CC(=O)c1ccc(cc1)S(=O)(=O)NC(=O)NC1CCCCC1                                                                                                               |
| C1941 | HIA | HIA+ | 14              | CCC1(CCC(C)C)C(=O)NC(=O)NC1=O                                                                                                                          |
| C1942 | HIA | HIA- | 15              | OC(COc1cccc2c1c(=O)cc(o2)C(=O)[O-])COc1c2c(=O)cc(oc2ccc1)C(=O)[O-]                                                                                     |
| C1943 | HIA | HIA+ | 14              | CNC(=C[N+](=O)[O-])NCCSCc1ccc(CN(C)C)o1                                                                                                                |
| C1944 | HIA | HIA+ | 15,22           | COP(=O)(OC)OC(c1ccc(Cl)cc1)P(=O)(OC)OC                                                                                                                 |
| C1945 | HIA | HIA- | 18              | COc1cc2c(Sc3cccc3N2CC(C)CN(C)C)cc1                                                                                                                     |
| C1946 | HIA | HIA+ | 15,16,19,22     | CC(C)(C)NCC(O)COc1c2C[C@H](O)[C@H](O)Cc2ccc1                                                                                                           |
| C1947 | HIA | HIA- | 15              | CNC(=O)c1c(I)c(NC(=O)C)c(I)c(C(=O)[O-])c1I                                                                                                             |
| C1948 | HIA | HIA+ | 14              | COCCCOc1c(C)c(C[S@@])(=O)c2nc3cccc3[nH]2)nc1                                                                                                           |
| C1949 | HIA | HIA+ | 20              | N(N=C(C#N)C#N)c1ccc(cc1)C1=NNC(=O)C[C@H]1C                                                                                                             |
| C1950 | HIA | HIA+ | 15,16,19,21,22  | OC[C@@H](NC(=O)C(Cl)Cl)[C@H](O)c1ccc(cc1)[N+](=O)[O-]                                                                                                  |
| C1951 | HIA | HIA+ | 16              | O[C@H](COc1nsnc1N1CCOCC1)CNC(C)(C)C                                                                                                                    |
| C1952 | HIA | HIA+ | 15              | OC(=O)[C@@H](N)Cc1cc(O)c(O)cc1                                                                                                                         |
| C1953 | HIA | HIA+ | 17              | N1c2cccc2N=c2sc(cc2=C1N1CCN(C)CC1)C                                                                                                                    |
| C1954 | HIA | HIA- | 14              | Nc1nc(S)c2nc[nH]c2n1                                                                                                                                   |
| C1955 | HIA | HIA- | 15              | OC(=O)C(O/N=C(\C(=O)N[C@@H]1C(=O)N([C@H]1C)S(=O)(=O)O)/c1csc(n1)N)(C)C                                                                                 |
| C1956 | HIA | HIA+ | 15,22           | O/C(=C/1\N(C)S(=O)(=O)c2c(scc2)C1=O)/Nc1cccc1                                                                                                          |
| C1957 | HIA | HIA+ | 15              | OC(=O)CN1c2cccc2CC[C@H](N[C@H](C(=O)OCC)CCc2cccc2)C1=O                                                                                                 |
| C1958 | HIA | HIA+ | 14,15,17,22     | NC(=N)NC(=O)c1nc(Cl)c(N)nc1N                                                                                                                           |
| C1959 | HIA | HIA+ | 14,20           | CCN(C)C(=O)Oc1cccc(c1)[C@H](C)N(C)C                                                                                                                    |
| C1960 | HIA | HIA+ | 15,17,22        | NC(=Nc1nc(CSCC/C(=N\S(=O)(=O)N)/N)cs1)N                                                                                                                |
| C1961 | HIA | HIA+ | 15,18,22        | COc1cc2c(cc1)n(C(=O)c1ccc(Cl)cc1)c(C)c2CC(=O)O                                                                                                         |
| C1962 | HIA | HIA+ | 14,16,19,21,22  | OC(=O)c1cccc1O                                                                                                                                         |
| C1963 | HIA | HIA+ | 14              | CC1(C)OC2CC3C4CCC5=CC(=O)C=CC5(C)C4(F)C(O)CC3(C)C2(O1)C(=O)CO                                                                                          |
| C1964 | HIA | HIA+ | 18              | c1ccc(cc1)[C@@](OCC[C@@H]1N(C)CCC1)(c1ccc(Cl)cc1)C                                                                                                     |
| C1965 | HIA | HIA- | 20              | O[C@H]1[C@H](O[C@H]2OC(=CC[C@H]2N)CN)[C@@H](N)C[C@@H](NCC)[C@@H]1O[C@H]1OC[C@@](O)(C)[C@H](NC)[C@H]1O                                                  |
| C1966 | HIA | HIA+ | 15,22           | CCOc1cccc1OCC1CNCCO1                                                                                                                                   |
| C1967 | HIA | HIA+ | 15              | CC(N)(Cc1cc(O)c(O)cc1)C(=O)O                                                                                                                           |
| C1968 | HIA | HIA+ | 14,18           | CN(C)C(=O)Cc1c(nc2ccc(C)cn12)c1ccc(C)cc1                                                                                                               |
| C1969 | HIA | HIA+ | 15,16,19,21     | CC1=C(N2[C@H](SC1)[C@H](NC(=O)[C@H](N)c1cccc1)C2=O)C(=O)O                                                                                              |
| C1970 | HIA | HIA+ | 15,16,19,22     | CC(C)NCC(O)c1ccc(NS(=O)(=O)C)cc1                                                                                                                       |
| C1971 | HIA | HIA+ | 14,15,21,22     | Cn1c2c([nH]cn2)c(=O)n(C)c1=O                                                                                                                           |
| C1972 | HIA | HIA+ | 18              | CN(C)CCCN1c2cccc2Sc2cccc12                                                                                                                             |
| C1973 | HIA | HIA+ | 15,22           | On1c(=N)nc(cc1N)N1CCCCC1                                                                                                                               |
| C1974 | HIA | HIA+ | 20,22           | N1c2c(N=c3cccc3=C1N1CCN(C)CC1)ccc(Cl)c2                                                                                                                |
| C1975 | HIA | HIA+ | 15,16,17,19,22  | NS(=O)(=O)c1cc(C(=O)O)c(NCc2ccco2)cc1Cl                                                                                                                |
| C1976 | HIA | HIA+ | 18              | CN(C)CCOC(c1cccc1)c1cccc1                                                                                                                              |

|       |     |      |                  |                                                                                                                                                           |
|-------|-----|------|------------------|-----------------------------------------------------------------------------------------------------------------------------------------------------------|
| C1977 | HIA | HIA+ | 14               | Cn1nnc2c(ncn2c1=O)C(=O)N                                                                                                                                  |
| C1978 | HIA | HIA+ | 14               | CC1(C)S[C@H]2[C@H](NC(=O)[C@@H](N)c3ccccc3)C(=O)N2[C@@H]1C(=O)O                                                                                           |
| C1979 | HIA | HIA- | 14               | CN(C)C(=O)OC1=CN(C)C=C=C1                                                                                                                                 |
| C1980 | HIA | HIA+ | 14               | CC1=CN=C[C@H](N1O)C(=O)O                                                                                                                                  |
| C1981 | HIA | HIA+ | 14               | Nc1nc2c(ncn2[C@@H]2C[C@@H](CO)C=C2)c(N)n1                                                                                                                 |
| C1982 | HIA | HIA+ | 14               | CC(=CC(=O)O)c1nc(ccc1)C(=CCN1CCCC1)c1ccc(C)cc1                                                                                                            |
| C1983 | HIA | HIA+ | 14               | CC[C@H]1OC(=O)[C@@H](C)C(=O)[C@@H](O)[C@@H](O)[C@@H]2O[C@H](C)C[C@@H](C)[C@@H]2O)N(C)C[C@@H](C)C(=O)[C@@H](C)[C@H]2N(CCCn3cnc(c3)c3cnc3)C(=O)O[C@H]12C)OC |
| C1984 | HIA | HIA+ | 14               | CC(C)NC[C@H](O)c1cc(NS(=O)(=O)C)ccc1                                                                                                                      |
| C1985 | HIA | HIA+ | 14               | CC1(C)S[C@H]2[C@H](NC(=O)[C@@H](N)c3ccc(O)cc3)C(=O)N2[C@H]1C(=O)O                                                                                         |
| C1986 | HIA | HIA- | 14               | COC1CC(CCC1O)C=C(C)C1OC(=O)C2CCCCN2C(=O)C(=O)C2(O)OC(C(CC2C)OC)C(CC(C)CC(=CC(CC=C)C(=O)CC(O)C1C)C)OC                                                      |
| C1987 | HIA | HIA- | 14               | NC[C@@H]1O[C@@H](O)[C@H]2[C@@H](N)C[C@@H](N)[C@H](O)[C@H]3O[C@@H](CO)[C@H](O)[C@@H](N)[C@H]3O)[C@H]2O)[C@H](N)C[C@@H]1O                                   |
| C1988 | HIA | HIA- | 14               | OC[C@@H]1O[C@H](OC[C@@H]2O[C@@H](O)[C@H](C#N)c3ccccc3)[C@@H](O)[C@@H](O)[C@H]2O)[C@H](O)[C@H](O)[C@H]1O                                                   |
| C1989 | HIA | HIA+ | 14               | C[C@H]12CC[C@H]3[C@H](CCC4=CC(=O)CC[C@H]34C)[C@@H]1CC[C@H]2O                                                                                              |
| C1990 | HIA | HIA+ | 14               | COc1cc(C)c(cc1OC)[S@](=O)C                                                                                                                                |
| C1991 | HIA | HIA+ | 14               | CN1c2c(cccc2)[C@@H](NCCCCC(=O)O)c2c(cc(Cl)cc2)S1(=O)=O                                                                                                    |
| C1992 | HIA | HIA+ | 14               | Cc1cc2c(cc1C)n(C[C@H](O)[C@@H](O)[C@H](O)CO)c1nc(=O)[nH]c(=O)c1n2                                                                                         |
| C1993 | HIA | HIA+ | 14               | CN1[C@H]2CC[C@@H]1CC(C2)OC(=O)c1c[nH]c2ccccc12                                                                                                            |
| C1994 | HIA | HIA+ | 14               | Oc1ccc(cc1)c1c(C(=O)c2ccc(OCCN3CCCC3)cc2)c2c(s1)cc(O)cc2                                                                                                  |
| C1995 | HIA | HIA+ | 15,16,19,22      | O=C1NC(=O)C(N1)(c1ccccc1)c1ccccc1                                                                                                                         |
| C1996 | HIA | HIA+ | 15               | CO/N=C(\C(=O)N[C@H]1[C@H]2SCC(=C(N2C1=O)C(=O)OCOC(=O)C(C)(C)C)/c1csc(N)n1                                                                                 |
| C1997 | HIA | HIA+ | 14               | N=C(Nc1ccccc1)Nc1ccccc1                                                                                                                                   |
| C1998 | HIA | HIA+ | 15,17,22         | OC(=O)Cc1ccccc1Nc1c(Cl)ccccc1Cl                                                                                                                           |
| C1999 | HIA | HIA+ | 14               | CC1(OC(=CC1=O)C(=O)O)c1ccccc1                                                                                                                             |
| C2000 | HIA | HIA+ | 14               | N(N=Nc1ccccc1)c1ccccc1                                                                                                                                    |
| C2001 | HIA | HIA+ | 3,15,16,18,19,22 | CC(C)NCC(O)COc1ccc(NC(=O)C)cc1                                                                                                                            |
| C2002 | HIA | HIA+ | 18               | c1cc(OC)c(OC)c2c1[C@H](OC2=O)[C@@H]1N(C)CCc2cc3c(OCO3)c(OC)c12                                                                                            |
| C2003 | HIA | HIA+ | 18               | NC(=O)CCCN/C(=C/\C=C(F)C=CC1=O)/c1ccc(Cl)cc1                                                                                                              |
| C2004 | HIA | HIA+ | 15,22            | O/C(=C\1/N(C)S(=O)(=O)c2ccccc2C1=O)/Nc1ccc(s1)C                                                                                                           |
| C2005 | HIA | HIA- | 15               | OC(CNCCNC(=O)N1CCOCC1)COc1ccc(O)cc1                                                                                                                       |
| C2006 | HIA | HIA+ | 15               | N[C@H]1C(=O)NOC1                                                                                                                                          |
| C2007 | HIA | HIA+ | 20               | OC(=O)c1cn(c2c(OC)c(N3C[C@H]4NCCC[C@H]4C3)c(F)cc2e1=O)C1CC1                                                                                               |
| C2008 | HIA | HIA+ | 15,16,19,22      | C[C@H](CS)C(=O)N1CCC[C@H]1C(=O)O                                                                                                                          |
| C2009 | HIA | HIA+ | 15,16,18,19      | CN(Cc1nc2c(nc1)nc(N)nc2N)c1ccc(cc1)C(=O)N[C@@H](CCC(=O)O)C(=O)O                                                                                           |
| C2010 | HIA | HIA- | 23,15,16,18,19   | OC[C@@H](O)[C@@H](O)[C@H](O)[C@H](O)CO                                                                                                                    |
| C2011 | HIA | HIA+ | 15,16,19,22      | c1cn(c(n1)C)CC1C(=O)c2c(n(c3ccccc23)C)CC1                                                                                                                 |
| C2012 | HIA | HIA+ | 18               | Clc1ccc2n(C3CCN(CCCn4c(=O)[nH]c5ccccc45)CC3)c(=O)[nH]c2c1                                                                                                 |
| C2013 | HIA | HIA- | 14               | CNC(=O)c1c(I)c(NC(=O)C)c(I)c(C(=O)O)c1I                                                                                                                   |
| C2014 | HIA | HIA+ | 14,18            | Nc1nc(N)c2nc(c(N)nc2n1)c1ccccc1                                                                                                                           |
| C2015 | HIA | HIA- | 16,19,22         | OC(=O)c1cc(=O)c2c(o1)ccc(OCC(O)COc1ccccc3c1c(=O)cc(o3)C(=O)O)c2                                                                                           |
| C2016 | HIA | HIA+ | 20               | O/C(=C\1/C(=O)[C@@H](N(C)C)[C@@H]2[C@@H](O)[C@H]3C(=C(O)c4c(cccc4O)[C@]3(O)C)C(=O)[C@]2(O)C1=O)/N                                                         |
| C2017 | HIA | HIA+ | 15               | OC(=O)[C@H]1N(C(=O)C(N[C@@H](C(=O)OCC)CCc2ccccc2)C)CCC1                                                                                                   |
| C2018 | HIA | HIA+ | 15,16,19         | OC[C@H]1O[C@@H](n2cc(/C=C/Br)c(=O)[nH]c2=O)[C@@H](O)C1O                                                                                                   |
| C2019 | HIA | HIA+ | 14,20            | [C@@H]12C[C@@H](O)[C@](O)(C(=O)CO)[C@@]1(C)C[C@H](O)[C@@]1(F)[C@H]2CCC2=CC(=O)C=C[C@H]12C                                                                 |
| C2020 | HIA | HIA- | 15               | CN(CCCCCN(C)C(=O)O)c1ccc[n+](C)c1)C(=O)O)c1ccc[n+](C)c1                                                                                                   |
| C2021 | HIA | HIA- | 14,22            | OC(=O)CN(CCN(CC(=O)O)Cc1ccccc1O)Cc1ccccc1O                                                                                                                |
| C2022 | HIA | HIA+ | 14               | Cc1cn([C@H]2C[C@H](N=[N+]=[N-])[C@H](CO)O2)c(=O)[nH]c1=O                                                                                                  |

|       |     |      |                |                                                                                                                                                                               |
|-------|-----|------|----------------|-------------------------------------------------------------------------------------------------------------------------------------------------------------------------------|
| C2023 | HIA | HIA+ | 15             | [nH]1c(nc2cccc12)CCCN(C)CC[C@@]1(OC(=O)COC)CCc2c(ccc(F)c2)[C@@H]1C(C)C                                                                                                        |
| C2024 | HIA | HIA+ | 15,16,17,19    | Cc1cn([C@H]2[C@H](N=[N+]=[N-])[C@@H](CO)O2)c(=O)[nH]c1=O                                                                                                                      |
| C2025 | HIA | HIA+ | 21             | c1ccc2N(C(=O)[C@H](OC(=O)C)[C@@H](Sc2c1)c1ccc(OC)cc1)CCN(C)C                                                                                                                  |
| C2026 | HIA | HIA+ | 14             | CC(C)NC[C@@H](O)COc1cccc2cccc12                                                                                                                                               |
| C2027 | HIA | HIA+ | 16,17,18,19,21 | CC(C)NCC(O)COc1c2cccc2ccc1                                                                                                                                                    |
| C2028 | HIA | HIA+ | 15,16,18,19,22 | CN/C(=N)CCSCc1c(C)[nH]cn1)/NC#N                                                                                                                                               |
| C2029 | HIA | HIA- | 15             | NS(=O)(=O)c1c(Cl)cc(NCc2cccs2)c(c1)c1nnn[nH]1                                                                                                                                 |
| C2030 | HIA | HIA+ | 20             | NC(=NCC1OC2(OC1)CCCC2)N                                                                                                                                                       |
| C2031 | HIA | HIA- | 14             | OC(=O)C1=C[C@H](N=C(N)N)[C@@H](NC(=O)C)[C@@H](O1)[C@H](O)[C@H](O)CO                                                                                                           |
| C2032 | HIA | HIA+ | 14             | CCOc1c(OC[C@H]2CNCCO2)cccc1                                                                                                                                                   |
| C2033 | HIA | HIA+ | 18,22          | COc1ccc(cc1)C1Sc2c(cccc2)N(CC(N)C)C(=O)C1OC(=O)C                                                                                                                              |
| C2034 | HIA | HIA+ | 14             | NCCOCC1=C(C(=O)OCC)C(c2cccc2Cl)C(=C(N1)C)C(=O)OC                                                                                                                              |
| C2035 | HIA | HIA+ | 14             | COc1ccc(cc1)[C@H](CN(C)C)C1(O)CCCC1                                                                                                                                           |
| C2036 | HIA | HIA+ | 15,16,18,19    | COc1cc2nc(nc(N)c2cc1OC)N1CCN(CC1)C(=O)c1cccc1                                                                                                                                 |
| C2037 | HIA | HIA+ | 20             | O[C@H]1C=C[C@@]23c4c(ccc(OC)c4O[C@H]2C1)CN(C)CC3                                                                                                                              |
| C2038 | HIA | HIA+ | 17             | CO[C@H]1C=C(O[C@@]2(C)Oe3c(C2=O)e2c(c(O)c3C)C(=O)C(=C3)NC4(CCN(CC(C)C)CC4)N=C23)NC(=O)C(=C=C/[C@@H](C)[C@H](O)[C@@H](C)[C@H](O)[C@@H](C)[C@H](OC(=O)C)[C@@H]1C)/C             |
| C2039 | HIA | HIA+ | 14,15          | O/N=C\1/CCCC(c2ccc(cc2)C(C(=O)O)C)C1                                                                                                                                          |
| C2040 | HIA | HIA- | 15,16,19       | Nc1nc2c(ncn2COC(CO)CO)c(=O)[nH]1                                                                                                                                              |
| C2041 | HIA | HIA+ | 14,15          | OC[C@H]1O[C@@H](n2nc(nc2)C(=O)N)[C@H](O)C1O                                                                                                                                   |
| C2042 | HIA | HIA+ | 14,15,16,19,22 | NC(=O)n1c(O)c(C(=O)c2cccs2)c2c1ccc(Cl)c2                                                                                                                                      |
| C2043 | HIA | HIA+ | 15,16,19       | NC(C(=O)NC1C2CCC(=C(N2C1=O)C(=O)O)Cl)c1cccc1                                                                                                                                  |
| C2044 | HIA | HIA- | 15,16,19       | NS(=O)(=O)c1cc2c(cc1Cl)N=CNS2(=O)=O                                                                                                                                           |
| C2045 | HIA | HIA+ | 14             | OC(=O)CCn1c2c(C[C@@H](CC2)NS(=O)(=O)c2ccc(F)cc2)c2c1cccc2                                                                                                                     |
| C2046 | HIA | HIA- | 23,15,22       | OC[C@H]1O[C@](O)(CO)[C@H](O)C1O[C@H]1O[C@H](CO)[C@H](O)[C@H](O)C1O                                                                                                            |
| C2047 | HIA | HIA- | 15,16,19       | OC(=O)C1=C(COC(=O)N)CS[C@@H]2N1C(=O)[C@H]2NC(=O)/C(=N\OC)/c1cccc1                                                                                                             |
| C2048 | HIA | HIA- | 15             | [C@H]12SC(C)(C)[C@@H](N1C(=O)[C@H]2NC(=O)Cc1cccc1)C(=O)O                                                                                                                      |
| C2049 | HIA | HIA+ | 14             | Cc1nnc2CN=C(c3cccc3Cl)e3cc(Cl)ccc3n12                                                                                                                                         |
| C2050 | HIA | HIA+ | 20             | OC(=O)[C@H]1N2N(CCC1)CCC[C@H](N[C@H](C(=O)OCC)CCc1cccc1)C2=O                                                                                                                  |
| C2051 | HIA | HIA+ | 15,22          | OC[C@@H]1O[C@H](n2ccc(nc2=O)N)CS1                                                                                                                                             |
| C2052 | HIA | HIA+ | 18             | CN(C)CC/C=C\1/c2cccc2C=Cc2cccc12                                                                                                                                              |
| C2053 | HIA | HIA+ | 22             | OC(=O)[C@H](N(C(=O)CCCC)Cc1ccc(cc1)c1cccc1c1n[nH]nn1)C(C)C                                                                                                                    |
| C2054 | HIA | HIA+ | 15             | CCN(CC)CCC1C(CC(=O)NC1=O)c1cccc1                                                                                                                                              |
| C2055 | HIA | HIA+ | 15,16          | NC(=O)OCC1=C(N2C(=O)[C@@H](NC(=O)C(=N\OC)/c3cccc3)[C@H]2SC1)C(=O)OC(OC(=O)C)C                                                                                                 |
| C2056 | HIA | HIA+ | 19             | CO/N=C(/C(=O)NC1C2SCC(=C(N2C1=O)C(=O)OC(C)OC(=O)C)COC(=O)N)\c1cccc1                                                                                                           |
| C2057 | HIA | HIA- | 18             | CC[C@@H](CO)NC(=O)[C@H]1CN(C)[C@@H]2Cc3en(C)c4cccc(c34)C2=C1                                                                                                                  |
| C2058 | HIA | HIA+ | 14             | CCCC(C)C1(CC=C)C(=O)NC(=O)NC1=O                                                                                                                                               |
| C2059 | HIA | HIA+ | 15,22          | CN1/C(=C(O)Nc2cccn2)/C(=O)c2cccc2S1(=O)=O                                                                                                                                     |
| C2060 | HIA | HIA+ | 14             | CC(C)(C)NC[C@H](O)c1cc(O)cc(O)c1                                                                                                                                              |
| C2061 | HIA | HIA+ | 14             | OC(=O)Cc1cc2c(cc1)C(=O)c1cccc1CS2                                                                                                                                             |
| C2062 | HIA | HIA+ | 18,20          | OC1(CCN(CCCC(=O)c2ccc(F)cc2)CC1)c1ccc(Cl)cc1                                                                                                                                  |
| C2063 | HIA | HIA+ | 15,16,18,19,22 | COc1cc2c(ccnc2cc1)[C@H](O)[C@H]1C[C@@H]2CCN1C[C@@H]2C=C                                                                                                                       |
| C2064 | HIA | HIA+ | 14             | COc1cc2c(ccnc2cc1)[C@@H](O)[C@@H]1C[C@@H]2CCN1C[C@@H]2C=C                                                                                                                     |
| C2065 | HIA | HIA+ | 15,22          | CC(Cc1ccc(O)cc1)NCC(O)c1cc(O)cc(O)c1                                                                                                                                          |
| C2066 | HIA | HIA+ | 15,16,19       | CC1(C)S[C@@H]2[C@H](NC(=O)[C@H](N)c3ccc(O)cc3)C(=O)N2[C@H]1C(=O)O                                                                                                             |
| C2067 | HIA | HIA+ | 14             | CCOC(=O)[C@H](CCc1cccc1)N[C@@H](C)C(=O)N1Cc2cccc2C[C@H]1C(=O)O                                                                                                                |
| C2068 | HIA | HIA+ | 15,22          | O[C@H]1[C@H](O)[C@H]2[C@@H](O)C1[C@H](O)[C@H]3[C@H](O)C1[C@H](O)C1[C@H]4CC[C@@]5(C)C@H(C)C1[C@H]6[C@H]5[C@@H](O)[C@]5(C)C7=CC(=O)OC7)CC(C)[6S(O)C4]OC3C)OC2C)O[C@H](C)[C@H]1O |

|       |     |      |                  |                                                                                                                                                           |
|-------|-----|------|------------------|-----------------------------------------------------------------------------------------------------------------------------------------------------------|
| C2069 | HIA | HIA+ | 14               | COc1ccc2c(cccc2c1C(F)(F)F)C(=S)N(C)CC(=O)O                                                                                                                |
| C2070 | HIA | HIA+ | 15,22            | O/C(=C/1\N(C)S(=O)(=O)c2ccccc2C1=O)/Nc1noc(c1)C                                                                                                           |
| C2071 | HIA | HIA+ | 14,15            | [C@@H]12CC[C@@]3(CCC(=O)O3)[C@@]1(C)CC[C@H]1[C@H]2[C@@H](CC2=CC(=O)CC[C@@]12C)SC(=O)C                                                                     |
| C2072 | HIA | HIA- | 14               | O[C@H](CNCCNC(=O)N1CCOCC1)COc1ccc(O)cc1                                                                                                                   |
| C2073 | HIA | HIA- | 15,16            | C[C@H](N[C@H](CCc1ccccc1)C(=O)O)C(=O)N1CCCC[C@@H]1C(=O)O                                                                                                  |
| C2074 | HIA | HIA- | 19               | CC(NC(Cc1ccccc1)C(=O)O)C(=O)N1CCCC1C(=O)O                                                                                                                 |
| C2075 | HIA | HIA+ | 14               | CC(C)NC[C@@H](O)COc1ccc(CC(=O)N)cc1                                                                                                                       |
| C2076 | HIA | HIA+ | 14               | OCC1OC(C(O)C1O)n1cc(C=Br)c(=O)[nH]c1=O                                                                                                                    |
| C2077 | HIA | HIA+ | 15,22            | Cc1c(OCC(F)(F)F)ccnc1CS(=O)c1nc2c([nH]1)cccc2                                                                                                             |
| C2078 | HIA | HIA- | 14,15,17         | Nc1nc2c(nen2COCCO)c(=O)[nH]1                                                                                                                              |
| C2079 | HIA | HIA+ | 15               | O[C@H]1[C@H](OC2C(C)[C@H](O)[C@@H]3[C@@H](C)[C@H](O)[C@@](OC)(C)C3)[C@H](C=O)O[C@H](CC)[C@](O)(C)[C@H](O)[C@H](N(C)CC(C)[C@]2(O)C)C)O[C@H](C)[C@@H]1N(C)C |
| C2080 | HIA | HIA+ | 17               | Cc1ccccc(C)c1NC(=O)c1cc(c(Cl)cc1O)S(=O)(=O)N                                                                                                              |
| C2081 | HIA | HIA- | 14,23,15,22      | OC[C@H]1O[C@](O[C@H]2O[C@H](CO[C@H]3O[C@H](CO)[C@H](O)[C@H](O)C3O)[C@@H](O)[C@H](O)C2O)(CO)[C@@H](O)C1O                                                   |
| C2082 | HIA | HIA+ | 20               | CC(C)(C)NCC(O)c1ccc(O)c(CO)c1                                                                                                                             |
| C2083 | HIA | HIA+ | 14               | Cc1noc(NS(=O)(=O)c2ccc(N)cc2)c1C                                                                                                                          |
| C2084 | HIA | HIA- | 20               | CC1(C)C(N2C(=O)CC2S1(=O)=O)C(=O)[O-]                                                                                                                      |
| C2085 | HIA | HIA+ | 15               | OC(=O)C1=CCS[C@H]2N1C(=O)[C@H]2NC(=O)/C(=N\OC)/c1csc(n1)N                                                                                                 |
| C2086 | HIA | HIA+ | 14,18            | CCCC(C)(COC(=O)N)COC(=O)N                                                                                                                                 |
| C2087 | HIA | HIA+ | 23,15,21,22      | CCN1CCCC1CNC(=O)c1c(OC)ccc(c1)S(=O)(=O)N                                                                                                                  |
| C2088 | HIA | HIA+ | 14               | CCN1CCC[C@@H]1CNC(=O)c1cc(ccc1OC)S(=O)(=O)N                                                                                                               |
| C2089 | HIA | HIA+ | 15,22            | OC(=O)[C@@H]1N2C(=O)[C@@H](NC(=O)C(C(=O)Oc3ccccc3)c3ccccc3)[C@H]2SC1(C)C                                                                                  |
| C2090 | HIA | HIA+ | 15               | OC(=O)[C@H]1N(C(=O)CP(=O)(OC(OC(=O)CC)(C)C)CCCCc2ccccc2)[C@@H](C1)C1CCCC1                                                                                 |
| C2091 | HIA | HIA- | 18               | CN(C)CC/C=C/1\c2c(COc3c1ccccc3)cccc2                                                                                                                      |
| C2092 | HIA | HIA+ | 14,17            | Oc1c2en[nH]c2nen1                                                                                                                                         |
| C2093 | HIA | HIA+ | 15,16,19         | CCn1cc(C(=O)O)c(=O)c2cc(F)c(cc12)N1CCNCC1                                                                                                                 |
| C2094 | HIA | HIA+ | 15,16,19,22      | [C@@H]12CC[C@](O)(C(=O)CO)[C@@]1(C)C[C@H](O)[C@H]1[C@H]2CCCC2=CC(=O)C=C[C@]12C                                                                            |
| C2095 | HIA | HIA+ | 14               | OC(=O)C1=CC(=N)Nc2ccc(cc2)S(=O)(=O)Nc2cccn2)C=CC1=O                                                                                                       |
| C2096 | HIA | HIA+ | 3,15,16,18,19,20 | OC(=O)C1=C/C(=N)Nc2ccc(cc2)S(=O)(=O)Nc2cccn2)/C=CC1=O                                                                                                     |
| C2097 | HIA | HIA+ | 15,22            | [C@@H]12Oc3c(OC)ccc4c3[C@]31CCN(C)[C@H](C4)[C@@H]3C=C[C@@H]2O                                                                                             |
| C2098 | HIA | HIA+ | 14               | CCN(CC)Cc1cc(Nc2c3ccc(Cl)cc3nec2)ccc1O                                                                                                                    |
| C2099 | HIA | HIA+ | 14               | CC[C@@]12CCCN3CCc4c([C@H]13)n(c1ccccc41)C(=C2)C(=O)O                                                                                                      |
| C2100 | HIA | HIA+ | 15,22            | O/C(=C/1\N(C)S(=O)(=O)c2c(sc(Cl)c2)C1=O)/Nc1cccn1                                                                                                         |
| C2101 | HIA | HIA+ | 15               | OC[C@H]1O[C@H]2n3cc(F)c(=N)nc3O[C@H]2C1O                                                                                                                  |
| C2102 | HIA | HIA- | 15               | O[C@H]1CC(=O)O[C@H](CCC2[C@H](C=CC3=C[C@H](C)C[C@H](OC(=O)[C@@H](C)CC)[C@H]23)C)C1                                                                        |
| C2103 | HIA | HIA- | 15               | oc[C@H]1O[C@H](O[C@@H]2[C@H](O)[C@H](N)C[C@H](N)[C@H]2O)[C@H](CN)[C@@H](O)[C@H](O)[C@H]2N)[C@H](O)C1O[C@H]1O[C@H](CN)[C@@H](O)[C@H](O)[C@H]1N             |
| C2104 | HIA | HIA+ | 15               | NC(CCC(=O)O)C=C                                                                                                                                           |
| C2105 | HIA | HIA+ | 22               | CC(=O)CC(c1ccccc1)c1c(O)c2c(oc1=O)cccc2                                                                                                                   |
| C2106 | HIA | HIA+ | 14               | COc1c(OC)cc(CCN(C)CCC[C@@](C#N)(C(C)C)c2cc(OC)c(OC)cc2)cc1                                                                                                |
| C2107 | HIA | HIA- | 15,20            | OC(COc1ccc(cc1)CCNC(=O)NC(C)C)CNC(C)C                                                                                                                     |
| C2108 | HIA | HIA+ | 20               | OCc1c(Cl)nc(n1)Cc1ccc(cc1)c1ccccc1c1n[nH]nn1)CCCC                                                                                                         |
| C2109 | HIA | HIA+ | 18               | [nH]1cc(c2c1ccc(c2)CCS(=O)(=O)c1ccccc1)C[C@@H]1N(C)CCC1                                                                                                   |
| C2110 | HIA | HIA+ | 15               | OC(=O)C1=C(C)CSC2N1C(=O)C2NC(=O)C(N)c1ccc(O)cc1                                                                                                           |
| C2111 | HIA | HIA+ | 15,16,19         | [C@H]12SC(C)(C)[C@@H](N1C(=O)[C@H]2NC(=O)COc1ccccc1)C(=O)O                                                                                                |
| C2112 | HIA | HIA+ | 14               | Oc1c(c(=O)c2ccccc2o1)C(c1ccccc1)CC(=O)C                                                                                                                   |
| C2113 | HIA | HIA+ | 15,16,18,19,21   | CC(=O)CC(c1ccccc1)c1c(O)oc2ccccc2c1=O                                                                                                                     |
| C2114 | HIA | HIA+ | 15,22            | [C@@H]12Oc3c(O)ccc4c3[C@]31CCN(C)[C@H](C4)[C@@H]3C=C[C@@H]2O                                                                                              |

|       |     |      |             |                                                                                                                                                                         |
|-------|-----|------|-------------|-------------------------------------------------------------------------------------------------------------------------------------------------------------------------|
| C2115 | HIA | HIA+ | 15,16,19,22 | [C@@H]12CC[C@H](C(=O)C)[C@@]1(C)CC[C@H]1[C@H]2CCC2=CC(=O)CC[C@]12C                                                                                                      |
| C2116 | HIA | HIA+ | 15,22       | OCC(C(=O)OC1C[C@H]2N(C)[C@H](CC2)C1)c1cccc1                                                                                                                             |
| C2117 | HIA | HIA- | 15,16       | c1ccc(cc1)CC[C@@H](C(=O)[O-])[NH2+][C@H](C(=O)N1CCCC[C@H]1C(=O)[O-])CCCC[NH3+]                                                                                          |
| C2118 | HIA | HIA- | 19          | NCCCCC(NC(CCc1cccc1)C(=O)O)C(=O)N1CCCC1C(=O)O                                                                                                                           |
| C2119 | HIA | HIA- | 18          | CN1CCN(CC(=O)n2c3cccc3c(=O)[nH]c3e2nccc3)CC1                                                                                                                            |
| C2120 | HIA | HIA+ | 14,15,22    | CN(C)c1c(C)n(C)n(c1=O)c1cccc1                                                                                                                                           |
| C2121 | HIA | HIA+ | 14          | CN1[C@H]2C[C@@H](C[C@@H]1)[C@H]1O[C@@H]21)OC(=O)[C@H](CO)c1cccc1                                                                                                        |
| C2122 | OB  | OB-  | 27          | [C@](c1cc(c(c1)OC)OC)OC)(C(C)C)(CCC[N@H+](CCc1cc(c(cc1)OC)OC)C)C#N                                                                                                      |
| C2123 | OB  | OB+  | 27          | c1(cc(c(cc1)O)C(=O)[O-])[C@@H](C[NH2+])C(C)(C)O                                                                                                                         |
| C2124 | OB  | OB+  | 27          | C(c1cccc1)(C(=O)N)(C(=O)N)CC                                                                                                                                            |
| C2125 | OB  | OB+  | 27          | C1C(=O)C=C2[C@H](C1)[C@@H]1[C@@H](CC2)[C@H]2[C@](CC1=C)([C@](CC2)(O)C#C)CC                                                                                              |
| C2126 | OB  | OB+  | 27          | c12c(n(cn1)[C@@H]1C[C@@H](C=C1)CO)nc(nc2NC1CC1)N                                                                                                                        |
| C2127 | OB  | OB-  | 27          | S(=O)(=O)(CCCCN(=O)C)[O-]                                                                                                                                               |
| C2128 | OB  | OB-  | 27          | [C@@H]1([C@@H]([C@@H]([C@@H](O)C@H]1CO)O)O)O)O)O)[C@@H]1([C@@H]([C@@H]([C@@H](O1)C)[NH2+][C@@H]1[C@@H]([C@@H]([C@@H](C=C1)CO)O)O)O)O)O)O)O)O                            |
| C2129 | OB  | OB+  | 27          | c1(c(ccc(c1)NC(=O)CCC)OC[C@@H](C[NH2+])C(C)O)C(=O)C                                                                                                                     |
| C2130 | OB  | OB+  | 27          | [C@@H](c1c(c2c(cccc2)oc1=O)O)(c1ccc(cc1)[N+](=O)[O-])CC(=O)C                                                                                                            |
| C2131 | OB  | OB+  | 27          | c1c(ccc(c1)NC(=O)C)O                                                                                                                                                    |
| C2132 | OB  | OB+  | 27          | S(=O)(=O)(c1sc(nm1)NC(=O)C)N                                                                                                                                            |
| C2133 | OB  | OB+  | 26          | ONC(=O)C                                                                                                                                                                |
| C2134 | OB  | OB-  | 27          | [C@@H](C(=O)[O-])(NC(=O)C)CS                                                                                                                                            |
| C2135 | OB  | OB+  | 27          | c12c(nen1COCCO)c(=O)[nH]c(n2)N                                                                                                                                          |
| C2136 | OB  | OB+  | 27          | c1(c[n+](c(cn1)C)[O-])C(=O)[O-]                                                                                                                                         |
| C2137 | OB  | OB+  | 27          | c1(c(cc(c(c1)C)/C=C/C(=C/C(=O)[O-])C)/C)OC)C                                                                                                                            |
| C2138 | OB  | OB+  | 27          | c1c(cc2c(c1)n1c(nnc1C[NH+])(C)C)CN=C2c1cccc1)Cl                                                                                                                         |
| C2139 | OB  | OB-  | 27          | N(C1(CC[NH+](CC1)CCn1n(nnc1=O)CC)COC)(c1cccc1)C(=O)CC                                                                                                                   |
| C2140 | OB  | OB+  | 27          | c12c(nc(nc1N)N(CCCN(=O)[C@@H]1OCCC1)C)cc(c(c2)OC)OC                                                                                                                     |
| C2141 | OB  | OB+  | 27          | c1(c(cc2c(c1)nn[nH]2)OC)C(=O)NC[C@@H]1[NH+](CCC1)CC=C                                                                                                                   |
| C2142 | OB  | OB+  | 27          | c12c([nH]nc1)nc[nH]c2=O                                                                                                                                                 |
| C2143 | OB  | OB+  | 27          | C([NH+])1CCN(CC1)c1nc(nc(n1)NCC=C)NCC=C)(c1ccc(cc1)F)c1ccc(cc1)F                                                                                                        |
| C2144 | OB  | OB+  | 27          | S(=O)(=O)(N1CCCC1)C(c1cc2c(cc1)[nH]cc2CC[NH+](C)C                                                                                                                       |
| C2145 | OB  | OB+  | 27          | c12c3c(nc1CCN(C2=O)C)c1c([nH]cn1)C)C)cccc3                                                                                                                              |
| C2146 | OB  | OB+  | 27          | n12c(nnc1C)CN=C(c1c2ccc(c1)Cl)c1cccc1                                                                                                                                   |
| C2147 | OB  | OB-  | 27          | c1(c(ccc1)CC=C)OC[C@H](C[NH2+])C(C)O                                                                                                                                    |
| C2148 | OB  | OB-  | 27          | [C@H]1([C@H](C(=O)C[C@H]1O)CCCCC(=O)[O-])/C=C/[C@H](CCCC)O                                                                                                              |
| C2149 | OB  | OB+  | 27          | C12(CC3CC(C1)CC(C2)C3)[NH3+]                                                                                                                                            |
| C2150 | OB  | OB+  | 27          | c1(c(cc(cc1Br)Br)C[NH2+])C1CCC(CC1)O)N                                                                                                                                  |
| C2151 | OB  | OB-  | 27          | C(=N)[C@H]1[C@H]2N([C@@H](C(S2)(C)C)C(=O)[O-])C1=O)/N1CCCCC1                                                                                                            |
| C2152 | OB  | OB-  | 27          | C(=N)[C@H]1[C@H]2N([C@@H](C(S2)(C)C)C(=O)O)C(=O)C(C)(C)C1=O)/N1CCCCC1                                                                                                   |
| C2153 | OB  | OB+  | 27          | c1cc(ccc1)n1c(cc(=N)cn1)OC                                                                                                                                              |
| C2154 | OB  | OB-  | 27          | [C@H]1([C@H]([C@H]([C@H]([C@H]([C@H]1NC(=O)C@H](CCN)N)OC@H]1[C@@H]([C@H]([C@H]([C@H]([C@H]1CN)O)O)O)O)O)O)O)O)O)O)O)[C@@H]1([C@H]([C@H]([C@H]([C@H]([C@H]1CO)O)[NH3+])O |
| C2155 | OB  | OB+  | 27          | c1(c(nc(c(n1)C1)N)N)C(=O)N=C(N)N                                                                                                                                        |
| C2156 | OB  | OB+  | 27          | c1cc(c2c(c1)nc1c(c2)Cn2c1cc1c(c2=O)CCC(=O)[C@@]1(CC)O)N                                                                                                                 |
| C2157 | OB  | OB+  | 27          | [NH3+]CC(=O)CCC(=O)[O-]                                                                                                                                                 |
| C2158 | OB  | OB+  | 27          | c1(c2c(oc1CCCC)cccc2)C(=O)c1cc(c(c1)I)OCC[NH+](CC)CC)I                                                                                                                  |
| C2159 | OB  | OB+  | 27          | [C@@H]1([C@H](O)C[C@H]2[C@@H]1OC(O2)(C)C)[C@@H](CO)O)OCCC[NH+](C)C                                                                                                      |
| C2160 | OB  | OB+  | 27          | S(=O)(=O)(c1c(cc(c(c1)C(=O)NC[C@H]1[NH+](CCC1)CC)OC)N)CC                                                                                                                |





|       |    |     |    |                                                                                                                                    |
|-------|----|-----|----|------------------------------------------------------------------------------------------------------------------------------------|
| C2207 | OB | OB+ | 27 | c1(ccc(cc1)CCOCC1CC1)OC[C@@H](C[NH2+])C(C)C)O                                                                                      |
| C2208 | OB | OB+ | 27 | c1ccc(cc1)OC[C@H](C[NH2+])CCc1ccc(c1)OC)OC)O)C                                                                                     |
| C2209 | OB | OB+ | 27 | C(Oc1cccc(cc1)CCNC(=O)c1cccc1)(C(=O)[O-])(C)C                                                                                      |
| C2210 | OB | OB- | 27 | c1(c(cccc1)OCCCC[NH2+])C)Cc1cccc1                                                                                                  |
| C2211 | OB | OB+ | 27 | [C@@H]12[C@@H](NC(=O)N1)CS[C@H]2CCCCC(=O)[O-]                                                                                      |
| C2212 | OB | OB+ | 27 | [C@@]([C@H]1[C@H]2C[C@@H](C1)C=C2)(c1cccc1)(CC[NH+]1CCCCC1)O                                                                       |
| C2213 | OB | OB+ | 27 | c1(ccc(cc1)COCCOC(C)C)OC[C@@H](C[NH2+])C(C)C)O                                                                                     |
| C2214 | OB | OB+ | 27 | c1(c(c(nc(n1)c1ncccn1)OCCO)Oc1c(cccc1)OC)NS(=O)(=O)c1ccc(cc1)C(C)C)C                                                               |
| C2215 | OB | OB+ | 27 | c1cccc(c1Br)C[N+](CC)(C)C                                                                                                          |
| C2216 | OB | OB+ | 27 | Br1cc2c(cc1)NC(=O)CN=C2c1ncccc1                                                                                                    |
| C2217 | OB | OB+ | 27 | c1(c(c(ccc1)CC(=O)[O-])N)C(=O)c1ccc(cc1)Br                                                                                         |
| C2218 | OB | OB+ | 27 | c1(c(c(cc(c1)Br)Br)N)C[NH+](C1CCCCC1)C                                                                                             |
| C2219 | OB | OB+ | 27 | [C@@H]12N(C(=O)[C@@H]([C@H]1C(C)C)NC(=O)[C@@H]1C=C3c4c5c(ccc4)N[C@H]([C@@H]5C[C@@H]3[NH+](C1)C)Br)[C@H](C(=O)N1[C@@H]2CCCC1)CC(C)C |
| C2220 | OB | OB+ | 27 | c1(c(cc(c(c1)Br)N)OC)C(=O)NCC[NH+](CC)CC                                                                                           |
| C2221 | OB | OB+ | 27 | Br1ccc(cc1)C(CC[NH+])(C)C)c1ncccc1                                                                                                 |
| C2222 | OB | OB+ | 27 | n12c(nnc1C)CN=C(c1c2sc(c1)Br)c1c(cccc1)Cl                                                                                          |
| C2223 | OB | OB+ | 27 | c12c(c[nH]c1cccc2)CC([NH2+])C[C@H](COc1c(cccc1)C#N)O)(C)C                                                                          |
| C2224 | OB | OB+ | 27 | [C@]12([C@]3([C@@H]([C@H]1[C@H]1[C@H]([C@H]([C@H](C2)O)[C@@]2(C(=CC(=O)C=C2)CC1)C)O[C@H](O3)CCC)C(=O)CO)C                          |
| C2225 | OB | OB+ | 27 | c1(c(cc(cc1OC)OC)OC)C(=O)CCC[NH+]1CCCC1                                                                                            |
| C2226 | OB | OB+ | 27 | c1ccc2c(c1CC)CC(=C2)[C@@H](O)C[NH2+])C(C)C)C                                                                                       |
| C2227 | OB | OB+ | 27 | c1(c(c(cc(c1)C(=O)[O-])NCCCC)Oc1cccc1)S(=O)(=O)N                                                                                   |
| C2228 | OB | OB+ | 27 | [C@]123[C@@]45[C@H]([NH+](CC1)CC1CC1)Cc1c2c(c(cc1)O)O[C@H]3[C@]([C@H](C4)[C@@](C(C)C)C)O)C(CC5)OC                                  |
| C2229 | OB | OB- | 27 | C12(CC(=O)N(C(=O)C1)CCCC[NH+]1CCN(CC1)c1ncccn1)CCCC2                                                                               |
| C2230 | OB | OB+ | 27 | S(=O)(=O)(OCCCCOS(=O)(=O)C)C                                                                                                       |
| C2231 | OB | OB- | 27 | [C@]123[C@]([C@H]([NH+](CC1)CC1CC1)Cc1c2cc(cc1)O)(CCCC3)O                                                                          |
| C2232 | OB | OB- | 27 | [N+]1(C2C3C(C1CC(C2)OC(=O)C(c1cccc1)CO)O3)(CCCC)C                                                                                  |
| C2233 | OB | OB+ | 27 | c12c3cccc1[nH]cc2C[C@@H]1[C@@H]3C[C@H](C[NH+]1CC=C)C(=O)N(C(=O)NCC)CCCN(C)C                                                        |
| C2234 | OB | OB+ | 27 | c12c(nen1C)n(c(=O)n(c2=O)C)C                                                                                                       |
| C2235 | OB | OB+ | 27 | [C@]12([C@H](/C=C/C=C/3)C=C)[C@H](C[C@@H](C3)O)O)/CCC1)CC[C@@H]2[C@H](CCCC(O)C)C)C                                                 |
| C2236 | OB | OB+ | 27 | c12n(c(nc1cccc2C(=O)[O-])OCC)Cc1ccc(cc1)c1c(cccc1)c1n[nH]nn1                                                                       |
| C2237 | OB | OB+ | 27 | [C@H]1(n2c(=O)nc(c2)F)NC(=O)OCCCC[C@@H]([C@@H]([C@H](O1)C)O)O                                                                      |
| C2238 | OB | OB+ | 27 | N1([C@@H](C(=O)[O-])CCC1)C(=O)[C@H](CS)C                                                                                           |
| C2239 | OB | OB+ | 27 | N1(c2c(cccc2)C=Cc2c1cccc2)C(=O)N                                                                                                   |
| C2240 | OB | OB+ | 27 | N12[C@@H]([C@@H](C1=O)NC(=O)C(c1cccc1)C(=O)O)SC([C@@H]2C(=O)[O-])(C)C                                                              |
| C2241 | OB | OB- | 27 | n1(c(=S)n(cc1)C)C(=O)OCC                                                                                                           |
| C2242 | OB | OB- | 27 | C1CCN(N=O)C(=O)NCCCC1                                                                                                              |
| C2243 | OB | OB- | 27 | [O-]C(=O)C[C@@H](OC(=O)C)C[N+](C)(C)C                                                                                              |
| C2244 | OB | OB+ | 27 | c1cc(c2c(c1)NC(=O)CC2)OC[C@@H](O)C[NH2+])C(C)C)C                                                                                   |
| C2245 | OB | OB+ | 27 | c12c3c([nH]c1cccc2CO[C@@H](C[NH2+])CCOc1c(cccc1)OC)O)cccc3                                                                         |
| C2246 | OB | OB- | 27 | N12[C@@H]([C@@H](C1=O)NC(=O)CC#N)SCC(=C2C(=O)[O-])COC(=O)C                                                                         |
| C2247 | OB | OB+ | 27 | N12[C@@H]([C@@H](C1=O)NC(=O)C(c1cccc1)[NH3+])SCC(=C2C(=O)[O-])Cl                                                                   |
| C2248 | OB | OB+ | 27 | N12[C@@H]([C@@H](C1=O)NC(=O)C(c1ccc(cc1)O)[NH3+])SCC(=C2C(=O)[O-])C                                                                |
| C2249 | OB | OB+ | 27 | N12[C@@H]([C@@H](C1=O)NC(=O)C(c1ccc(cc1)O)[NH3+])SCC(=C2C(=O)[O-])CSc1nn[nH]c1                                                     |
| C2250 | OB | OB- | 27 | N12[C@@H]([C@@H](C1=O)NC(=O)Cn1nnc1)SCC(=C2C(=O)[O-])CSc1sc(nn1)C                                                                  |
| C2251 | OB | OB- | 27 | N12[C@@H]([C@@H](C1=O)NC(=O)/C=N/O)/c1sc(nc1)N)SCC(=C2C(=O)[O-])C=C                                                                |
| C2252 | OB | OB+ | 27 | N12[C@@H]([C@@H](C1=O)NC(=O)/C=N/C(=O)CC(=O)O)/c1sc(nc1)N)SCC(=C2C(=O)[O-])C=C                                                     |

|       |    |     |    |                                                                                                                |
|-------|----|-----|----|----------------------------------------------------------------------------------------------------------------|
| C2253 | OB | OB- | 27 | N12[C@@H]([C@@H](C1=O)NC(=O)/C(=N/OC)/c1nc(sc1)N)SCC(=C2C(=O)[O-])CSc1sc(c(n1)C)CC(=O)O                        |
| C2254 | OB | OB- | 27 | N12[C@@H]([C@@H]([C@@H](C1=O)NC(=O)[C@@H](c1ccc(cc1)O)NC(=O)N1C(=O)C(=O)N(CC1)CC)SCC(=C2C(=O)[O-])CSc1n(nnn1)C |
| C2255 | OB | OB- | 27 | N12[C@@H]([C@@H]([C@@H](C1=O)NC(=O)/C(=N/OC)/c1nc(sc1)N)SCC(=C2C(=O)[O-])COC(=O)C                              |
| C2256 | OB | OB- | 27 | [C@]1([C@@H]2N(C1=O)C(=C(CS2)COC(=O)N)C(=O)[O-])(NC(=O)Cc1csc1)OC                                              |
| C2257 | OB | OB+ | 27 | N(=C(\C(=O)N[C@H]1[C@@H]2N(C(=C(CS2)COC)C(=O)O[C@@H](OC(=O)OC(C)C)C1=O)/c1nc(sc1)N)\OC                         |
| C2258 | OB | OB+ | 27 | N12[C@@H]([C@@H]([C@@H](C1=O)NC(=O)C(c1ccc(cc1)O)[NH3+])SCC(=C2C(=O)[O-])/C=C/C                                |
| C2259 | OB | OB- | 27 | N(=C(\C(=O)N[C@H]1[C@@H]2N(C(=C(CS2)C[n+]2cccc2)C(=O)[O-])C1=O)/c1nc(sc1)N)\OC(C(=O)[O-])(C)C                  |
| C2260 | OB | OB+ | 27 | S1[C@H]2N(C(=O)[C@H]2NC(=O)/C(=C\CC(=O)O)/c2nc(sc2)N)C(=CC1)C(=O)[O-]                                          |
| C2261 | OB | OB- | 27 | N(=C(\C(=O)N[C@H]1[C@@H]2N(C1=O)C(=CCS2)C(=O)[O-])/c1nc(sc1)N)\OC                                              |
| C2262 | OB | OB- | 27 | N(=C(\C(=O)N[C@H]1[C@@H]2N(C1=O)C(=C(CS2)CSc1nc(=O)c(nn1)C)O)C(=O)[O-])/c1nc(sc1)N)\OC                         |
| C2263 | OB | OB+ | 27 | N(=C(\C(=O)N[C@H]1[C@@H]2N(C(=C(CS2)COC(=O)N)C(=O)[O-])C1=O)/c1occc1)\OC                                       |
| C2264 | OB | OB+ | 27 | c1(c(cc(cc1)NC(=O)N(CC)CC)C(=O)C)OC[C@@H](O)C[NH2+][C(C)(C)C                                                   |
| C2265 | OB | OB+ | 27 | N12[C@H]([C@@H]([C@@H](C1=O)NC(=O)C(c1cccc1)[NH3+])SCC(=C2C(=O)[O-])C                                          |
| C2266 | OB | OB- | 27 | N12[C@@H]([C@@H]([C@@H](C1=O)NC(=O)Cc1csc1)SCC(=C2C(=O)[O-])COC(=O)C                                           |
| C2267 | OB | OB- | 27 | N12[C@H]([C@@H]([C@@H](C1=O)NC(=O)CSc1cnc1)SCC(=C2C(=O)[O-])COC(=O)C                                           |
| C2268 | OB | OB+ | 27 | N12[C@@H]([C@@H]([C@@H](C1=O)NC(=O)C(C1=CCC=CC1)[NH3+])SCC(=C2C(=O)[O-])C                                      |
| C2269 | OB | OB+ | 27 | C(=C\c1c(c(nc1C(C)C)C)COC)c1ccc(cc1)F/[C@H](C[C@H](CC(=O)[O-])O)O                                              |
| C2270 | OB | OB+ | 27 | [C@H]([NH+])1CC[NH+](CC1)CCOCC(=O)[O-](c1ccc(cc1)Cl)c1cccc1                                                    |
| C2271 | OB | OB+ | 27 | c1(ccc(cc1)CCCC(=O)[O-])N(CCC1)CCCl                                                                            |
| C2272 | OB | OB+ | 27 | c1c(ccc(c1)[N+](=O)[O-])C(O)C(COC(=O)CCCCCCCCCCCCC)NC(=O)C(Cl)Cl                                               |
| C2273 | OB | OB+ | 27 | c12c(ccc(c1)Cl)N=C(C[N+](=C2c1cccc1)[O-])NC                                                                    |
| C2274 | OB | OB- | 27 | Clc1ccc(cc1)N/C(=N/C(=N/CCCCC)/N=C(N=C(Nc1ccc(cc1)Cl)N)N)/N                                                    |
| C2275 | OB | OB+ | 27 | Clc1ccc(cc1)C1S(=O)(=O)CCC(=O)N1C                                                                              |
| C2276 | OB | OB+ | 27 | c12c(ccnc1cc(cc2)Cl)N(CCCC[NH+](CC)CC)C                                                                        |
| C2277 | OB | OB- | 27 | S1(=O)(=O)c2c(cc(c2)S(=O)(=O)N)Cl)N=CN1                                                                        |
| C2278 | OB | OB+ | 27 | c1(cc(c2c(c1O)nc2)Cl)Cl                                                                                        |
| C2279 | OB | OB+ | 27 | N(c1ccc(cc1)Cl)(c1ncccc1)CC[NH+](C)C                                                                           |
| C2280 | OB | OB+ | 27 | c12c(ccc(c1)Cl)Sc1c(cccc1)N2CCC[NH+](C)C                                                                       |
| C2281 | OB | OB+ | 27 | c1c(ccc(c1)Cl)S(=O)(=O)[N-]C(=O)NCCC                                                                           |
| C2282 | OB | OB+ | 27 | C(=C\1/c2c(ccc(c2)Cl)Sc2c1cccc2)\CC[NH+](C)C                                                                   |
| C2283 | OB | OB+ | 27 | [C@@]12([C@H]([C@@H]([C@@H](C(=C(C1=O)C(=O)N)O)[NH+](C)C)C[C@H]1C(=C2O)C(=O)c2c(c(ccc2O)Cl)[C@]1(O)C)O         |
| C2284 | OB | OB+ | 27 | c1ccc2c(c1)C(=O)N[C@]2(O)c1ccc(c(c1)S(=O)(=O)N)Cl                                                              |
| C2285 | OB | OB+ | 27 | C1([C@@H](C1)C1=NCCN1)(c1cccc1)c1cccc1                                                                         |
| C2286 | OB | OB+ | 27 | C(=C\1/C[C@@H]2[C@H]([C@@H]([C@@H](C[C@@H]2C1)O)C#C[C@H]([C@H](CC#CCC)C)O)/COCC(=O)[O-]                        |
| C2287 | OB | OB+ | 27 | C1CC1COCCOc1ccc(cc1)OCC(CCC(C)C)O                                                                              |
| C2288 | OB | OB+ | 27 | N12C(=O)[C@H]([NH2+][C@H](C(=O)OCC)CCc3cccc3)CCC[NH+]1CCC[C@H]2C(=O)[O-]                                       |
| C2289 | OB | OB+ | 27 | c1cccc(c1)CC[C@H](N[C@@H]1C(=O)N2[NH+](CCC1)CCC[C@H]2C(=O)[O-])C(=O)[O-]                                       |
| C2290 | OB | OB+ | 27 | C1(c2cc(c(cc2)OC)OC2CCCC2)(CCC(CC1)C(=O)[O-])C#N                                                               |
| C2291 | OB | OB- | 27 | c1(c([nH]cn1)C)SCCN/C(=N/C)/NC#N                                                                               |
| C2292 | OB | OB- | 27 | [C@@H]12[C@@H]([C@@H]([C@@H]3CC(C[C@H]1[N+])3(CC1CC1)C)OC(=O)[C@@H](c1cccc1)CO)O2                              |
| C2293 | OB | OB- | 27 | c1c(cc(cc1)CCC[NH2+][C@@H](c1ccc2c1cccc2)C)C(F)F                                                               |
| C2294 | OB | OB+ | 27 | Clc1cc2c(cc1)N(CCC#N)C(=O)C(O)N=C2c1c(ccc1)F                                                                   |
| C2295 | OB | OB+ | 27 | C1([C@@H](C1)c1ccc(cc1)OC(C(=O)[O-])(C)C)(Cl)Cl                                                                |
| C2296 | OB | OB+ | 27 | c12c(cc(c(n1)N1CCCC1)F)c(=O)c(en2C1CC1)C(=O)[O-]                                                               |
| C2297 | OB | OB+ | 27 | c1(c(cc(c(c1)Cl)N)OC)C(=O)N[C@@H]1[C@@H](C[NH+](CC1)CCCOc1ccc(cc1)F)OC                                         |
| C2298 | OB | OB+ | 27 | [C@]1(c2c(cc(cc2)C#N)CO1)(c1ccc(cc1)F)CCC[NH+](C)C                                                             |







|       |    |     |    |                                                                                                                                 |
|-------|----|-----|----|---------------------------------------------------------------------------------------------------------------------------------|
| C2437 | OB | OB+ | 27 | Fe1cn([C@@H]2O[C@@H]([C@@H](O)C2)CO)c(=O)[nH]c1=O                                                                               |
| C2438 | OB | OB+ | 27 | c1c(c(cc1)F)c1noc(c1C(=O)NC1C(=O)N2C1SC(C2(C(=O)[O-])C)(C)C)C1                                                                  |
| C2439 | OB | OB+ | 27 | c1(c(cc(cc1)F)F)C(Cn1ncn1)(Cn1ncn1)O                                                                                            |
| C2440 | OB | OB+ | 27 | c1(nc(=O)[nH]cc1F)N                                                                                                             |
| C2441 | OB | OB- | 27 | c1c(cc2c(c1)n1c(c(nc1)C(=O)OCC)CN(C2=O)C)F                                                                                      |
| C2442 | OB | OB- | 27 | [C@@]12([C@@]3([C@@H](C[C@H]1O(CO2)(C)C)[C@H]1[C@H]([C@H](C3)O)[C@@]2(C(=CC(=O)C=C2)[C@H](C1)F)C)C(=O)CO                        |
| C2443 | OB | OB+ | 27 | c12c(ccc(c1)[N+](=O)[O-])N(C(=O)CN=C2c1c(cccc1)F)C                                                                              |
| C2444 | OB | OB+ | 27 | [C@@H]12[C@@]3(C(=CC(=O)C=C3)[C@H](C[C@H]1[C@H]1[C@])(C[C@@H]2O)([C@H]([C@@H](C1)C)C(=O)CO)C)F)C                                |
| C2445 | OB | OB+ | 27 | C12(c3c(cccc3)C(=O)O1)c1c(cc(cc1)O)Oc1c2ccc(c1)O                                                                                |
| C2446 | OB | OB+ | 27 | c1(=O)c([nH]c(=O)[nH]1)F                                                                                                        |
| C2447 | OB | OB+ | 27 | C(c1cccc(c1)O[C@H](c1cccc1)CC[NH2+]C)(F)(F)F                                                                                    |
| C2448 | OB | OB+ | 27 | F[C@@]12[C@H]([C@H]3[C@@])([C@@](O)(CC3)C)(C[C@@H]1O)C)CCC1=CC(=O)CC[C@@]21C                                                    |
| C2449 | OB | OB+ | 27 | C1(=C\CC[NH+]2CCN(CC2)CCO)/c2c(ccc(c2)C(F)(F)F)Sc2c1cccc2                                                                       |
| C2450 | OB | OB- | 27 | N1(c2c(ccc(c2)C(F)(F)F)Sc2c1cccc2)CCC[NH+]1CCN(CC1)CCO                                                                          |
| C2451 | OB | OB+ | 27 | c1(c(nc(cc1)NCc1ccc(cc1)F)N)NC(=O)OCC                                                                                           |
| C2452 | OB | OB+ | 27 | c12c(ccc(c1)Cl)N(C(=O)CN=C2c1c(cccc1)F)CC[NH+](CC)CC                                                                            |
| C2453 | OB | OB+ | 27 | c1(cc(ccc1)F)c1ccc(cc1)[C@H](C(=O)[O-])C                                                                                        |
| C2454 | OB | OB+ | 27 | C(c1c(ccc(c1)NC(=O)C(C)C)[N+](=O)[O-])(F)(F)F                                                                                   |
| C2455 | OB | OB- | 27 | [C@]12([C@@]3(C(=CC(=O)C=C3)[C@H](C[C@H]1[C@H]1[C@])(C[C@@H]2O)([C@]([C@@H](C1)C)C(=O)SCF)OC(=O)CC)C)F)C)F                      |
| C2456 | OB | OB+ | 27 | c1(c(n(c2c1cccc2)C(C)C)/C=C/[C@H](C[C@H](CC(=O)[O-])O)O)c1ccc(cc1)F                                                             |
| C2457 | OB | OB+ | 27 | c1(ccc(cc1)C(=N/OCC[NH3+])/CCCCOC)C(F)(F)F                                                                                      |
| C2458 | OB | OB+ | 27 | N1([C@@H](C[C@H](C1)C1CCCC1)C(=O)[O-])C(=O)CP(=O)(O[C@H](OC(=O)CC)C(C)C)CCCCc1cccc1                                             |
| C2459 | OB | OB+ | 27 | c12c3c([nH]c1ccc(c2)C(=O)N)CC[C@H](C3)[NH2+]C                                                                                   |
| C2460 | OB | OB+ | 27 | [C@]1([C@H]([C@H]([C@@H](CO1)O)O)O)(CO)O                                                                                        |
| C2461 | OB | OB+ | 27 | c1(c(cc(cc1)NCc1ccc1)Cl)S(=O)(=O)N)C(=O)[O-]                                                                                    |
| C2462 | OB | OB+ | 27 | C(=C1/[C@H]2[C@@]([C@@]3([C@@H]([C@@]4([C@@H](CC3)[C@@H]([C@@H](CC4)O)C)C)[C@@H](C2)O)C)(C[C@@H]1OC(=O)C)\(C(=O)[O-])/CCC=C(C)C |
| C2463 | OB | OB- | 27 | c1c2c(cc3c1OCCO3)nc1c(c2C[NH+]2CCN(CC2)C)Cn2c1cc1c(c2=O)COC(=O)[C@@H]1CC                                                        |
| C2464 | OB | OB+ | 27 | C1(C(=O)[O-])(CCCC1)C[NH3+]                                                                                                     |
| C2465 | OB | OB+ | 27 | c1(ccc2c3c1O[C@@H]1[C@@]3(CC[NH+](C2)C)C=C[C@@H](C1)O)OC                                                                        |
| C2466 | OB | OB- | 27 | c12c(ccn1COC(CO)CO)c(=O)[nH]c(n2)N                                                                                              |
| C2467 | OB | OB+ | 27 | c12c(cc(c(c1OC)N1C[C@H]([NH2+]CC1)C)F)c(=O)c(cn2C1CC1)C(=O)[O-]                                                                 |
| C2468 | OB | OB+ | 27 | c1(c(cc2c(c1)c(nen2)Nc1ccc(c(c1)Cl)F)OC)OCCC[NH+]1CCOCC1                                                                        |
| C2469 | OB | OB+ | 27 | c1(c(ccc(c1)C)C)OCCCC(C(=O)[O-])(C)C                                                                                            |
| C2470 | OB | OB+ | 27 | Fe1c(nc2c(c1)c(=O)c(cn2C1CC1)C(=O)[O-])N1CC(/C(=N\OC)/C1)C[NH3+]                                                                |
| C2471 | OB | OB+ | 27 | n1(cncn1)C[C@]([C@@H](C)S(=O)(=O)C)(c1c(cc(cc1)F)F)O                                                                            |
| C2472 | OB | OB- | 27 | [C@H]1([C@H]([C@@H]([C@H](C[C@H]1N)N)O)[C@@H]1[C@@H](CC[C@H](O1)[C@H](NC)C)N)O)[C@@H]1[C@@H]([C@H]([C@](CO1)(O)C)[NH2+]C)O      |
| C2473 | OB | OB- | 27 | [C@H]1([C@H]([C@@H]([C@H](C[C@H]1N)N)O)[C@@H]1[C@@H](CC[C@H](O1)CC)N)O)[C@@H]1[C@@H]([C@H]([C@](CO1)(O)C)[NH2+]C)O              |
| C2474 | OB | OB+ | 27 | [C@@]12([C@@](C=C[C@H]1[C@H]1[C@H](CC2)[C@@H]2C(=CC(=O)CC2)CC1)(C#C)O)CC                                                        |
| C2475 | OB | OB+ | 27 | S(=O)(=O)(c1ccc(cc1)CCNC(=O)c1c(ccc(c1)Cl)OC)[N-]C(=O)NC1CCCCC1                                                                 |
| C2476 | OB | OB+ | 27 | c1(ccc(cc1)C)S(=O)(=O)[N-]C(=O)N[NH+]1C[C@H]2[C@@H](C1)CCCC                                                                     |
| C2477 | OB | OB+ | 27 | N1(C(=O)C(=C(C1)C)C)C(=O)NCCc1ccc(cc1)S(=O)(=O)[N-]C(=O)NC1CCC(CC1)C                                                            |
| C2478 | OB | OB+ | 27 | S(=O)(=O)(c1ccc(cc1)CCNC(=O)c1ncc(nc1)C)[N-]C(=O)NC1CCCCC1                                                                      |
| C2479 | OB | OB+ | 27 | [C@@H]1([C@@H]([C@H](O[C@H]([C@@H]1[NH3+])O)CO)O)O                                                                              |
| C2480 | OB | OB+ | 27 | OC[C@H](O)CO[N+](=O)[O-]                                                                                                        |
| C2481 | OB | OB- | 27 | C1([C@@](C(=O)O)[C@@H]2CC[N+](C2)(C)C)(O)c2cccc2)CCCC1                                                                          |
| C2482 | OB | OB+ | 27 | c12c(nn(c1cccc2)C)C(=O)NC1C[C@@H]2[NH+](C[C@@H](C1)CCC2)C                                                                       |





|       |    |     |    |                                                                                                                 |
|-------|----|-----|----|-----------------------------------------------------------------------------------------------------------------|
| C2529 | OB | OB+ | 27 | n12c(ccc1C(=O)c1cccc1)[C@H](CC2)C(=O)[O-]                                                                       |
| C2530 | OB | OB+ | 27 | s1c2c(cc1)/C(=C\1/CC[NH+](CC1)C)c1c(ccc1)CC2=O                                                                  |
| C2531 | OB | OB+ | 27 | c1cc2c(cc1O)c(c[nH]2)C[C@H](C(=O)[O-])[NH3+]                                                                    |
| C2532 | OB | OB+ | 27 | [C@H](C(=O)[O-])(CCCN=C(N)N)[NH3+]                                                                              |
| C2533 | OB | OB+ | 27 | c1(c(ccc1)[C@H](C[NH2+][C@H](CCc1cccc1)C)O)C(=O)N                                                               |
| C2534 | OB | OB- | 27 | [C@]1([C@H]([C@@H]([C@H](O1)CO)O[C@H]1[C@@H]([C@H]([C@H]([C@H](O1)CO)O)O)O)(CO)O                                |
| C2535 | OB | OB+ | 27 | [C@H]1(N2C(=O)N=C(CC2)N)O[C@H](SC1)CO                                                                           |
| C2536 | OB | OB+ | 27 | c1(c(nc(nn1)N)N)c1c(c(cc1)Cl)Cl                                                                                 |
| C2537 | OB | OB+ | 27 | c1([nH]c2c(n1)cccc2)S(=O)Cc1ccc(cen1)C)OCC(F)(F)F                                                               |
| C2538 | OB | OB- | 27 | Clc1cc(ccc1OCc1cc(ccc1)F)Nc1ncnc2c1cc(cc2)c1oc(cc1)C[NH2+]CCS(=O)(=O)C                                          |
| C2539 | OB | OB- | 27 | [C@]1([C@@H]2N(C1=O)C=C(CO2)CSc1n(nnn1)C)C(=O)[O-](NC(=O)[C@@H](c1ccc(cc1)O)C(=O)O)OC                           |
| C2540 | OB | OB+ | 27 | FC(F)(F)c1ccc(cc1)NC(=O)c1c(oc1)C O(C(C[NH+](CCC(c1cccc1)c1cccc1)C)(C)C)C(=O)C1=C(NC(=C(C1c1ccc(cc1)[N+](=O)[O- |
| C2541 | OB | OB- | 27 | )]C(=O)OC)C                                                                                                     |
| C2542 | OB | OB+ | 27 | C(c1ccc(cc1)C#N)(c1ccc(cc1)C#N)n1nnc1                                                                           |
| C2543 | OB | OB+ | 27 | [C@@H]1(c2cccc2)N=C2N(C1)CCS2                                                                                   |
| C2544 | OB | OB+ | 27 | N1(C(C(=O)N)CC)C(=O)CCC1                                                                                        |
| C2545 | OB | OB+ | 27 | O(c1c2c(ccc1)C(=O)CCC2)C[C@@H](O)C[NH2+]C(C)(C)C                                                                |
| C2546 | OB | OB+ | 27 | Fc1ccc(cc1)C1(CCC([NH+]2C[C@H]([C@](CC2)(c2cccc2)C(=O)[O-])C)CC1)C#N                                            |
| C2547 | OB | OB+ | 27 | c12c3ccc(c1OCC(n2cc(c3=O)C(=O)[O-])C)N1CC[NH+](CC1)CF                                                           |
| C2548 | OB | OB+ | 27 | [C@]12([C@@](CC[C@H]1[C@H]1[C@H](CC2)[C@@H]2C(=CC(=O)CC2)CC1)(C#C)O)CC                                          |
| C2549 | OB | OB+ | 27 | C12(c3c(ccc3)C(c3c1cccc3)CC2)C[C@H](C[NH2+]C)O                                                                  |
| C2550 | OB | OB+ | 27 | c1(ccc(cc1)NN=C(C#N)C#N)C1=NNC(=O)C[C@H]1C                                                                      |
| C2551 | OB | OB+ | 27 | c1(c(ccc1C)C)NC(=O)C[NH+](CC)CC                                                                                 |
| C2552 | OB | OB+ | 27 | [C@@H]1([C@H](NC(=O)[C@@H]2[NH+](C[C@@H](C2)CCC)C)[C@@H](O)C)[C@@H]([C@@H]([C@H]([C@H](O1)SC)O)O)O              |
| C2553 | OB | OB+ | 27 | c1(cc(cc1)N1CCOCC1)F)N1C(=O)O[C@H](C1)CNC(=O)C                                                                  |
| C2554 | OB | OB+ | 26 | S1SCC[C@H]1CCCCC(=O)[O-]                                                                                        |
| C2555 | OB | OB+ | 27 | N1(C(=O)[C@@H]([NH2+][C@@H](CCc2cccc2)C(=O)[O-])CCCCN)[C@@H](CCC1)C(=O)[O-]                                     |
| C2556 | OB | OB- | 27 | c12c3cccc1[nH]cc2C[C@H]1C3=C[C@@H](C[NH+]1C)NC(=O)N(CC)CC                                                       |
| C2557 | OB | OB+ | 27 | Clc1c(c(ccc1)Cl)OC(C1=NCCN1)C                                                                                   |
| C2558 | OB | OB+ | 27 | c12c(cc(c1F)N1C[C@H]([NH2+][CC1)C)F)c(=O)c(cn2CC)C(=O)[O-]                                                      |
| C2559 | OB | OB+ | 27 | ClCCN(N=O)C(=O)NC1CCCCC1                                                                                        |
| C2560 | OB | OB+ | 27 | C(c1cccc1)(c1cccc1)(C(=O)N(C)C)CC[NH+]1CCC(CC1)(c1ccc(cc1)Cl)O                                                  |
| C2561 | OB | OB+ | 27 | c1ccc(cc1)[C@@H]([NH3+])C[NH2+][C@@H]1C(=O)N2[C@@H]1CCC(=C2C(=O)[O-])Cl                                         |
| C2562 | OB | OB+ | 27 | C1(=C2CCN(CC2)C(=O)OCC)c2c(cc(cc2)Cl)CCc2c1nccc2                                                                |
| C2563 | OB | OB+ | 27 | C1(=N[C@@H](C(=O)Nc2c1cc(cc2)Cl)O)c1c(ccc1)Cl                                                                   |
| C2564 | OB | OB+ | 27 | c1cc(ccc1Cl)N(C(=O)Cc1cccc1)C1CC[NH+](CC1)C(C)C                                                                 |
| C2565 | OB | OB+ | 27 | c12c(ccc(c1)Cl)N(C(=O)[C@H](N=C2c1c(ccc1)Cl)O)C                                                                 |
| C2566 | OB | OB+ | 27 | n1(c(nc(c1CO)Cl)CCCC)Cc1ccc(cc1)c1c(ccc1)c1[n-]nnn1                                                             |
| C2567 | OB | OB- | 26 | ClCOC(=O)[C@]1(OC(=O)OCC)[C@@]2([C@H]([C@H]3[C@H]([C@@H](O)C2)[C@@]2(C(=CC(=O)C=C2)CC3)C)CC1)C                  |
| C2568 | OB | OB- | 27 | c12c3ccc(c1c1cc(cc2c(=O)n(c3=O)[NH2+][NC(=O)NN)S(=O)(=O)[O-])N)S(=O)(=O)[O-]                                    |
| C2569 | OB | OB+ | 27 | c1(ccc(c1)CC(=O)[O-])Nc1c(ccc1Cl)F)C                                                                            |
| C2570 | OB | OB+ | 27 | [C@]12([C@](CC[C@@H]1[C@@H]1[C@@H](CC2)[C@H]2C(=CCCC2)CC1)(O)C#C)C                                              |
| C2571 | OB | OB- | 27 | [C@H]([C@@H]([C@@H](CO)O)O)([C@@H](CO)O)O                                                                       |
| C2572 | OB | OB+ | 27 | c1ccc2c(c1)C1(c3c(ccc3)C2CC1)CCC[NH2+]C                                                                         |
| C2573 | OB | OB+ | 27 | FC1(F)CCC(C(=O)N[C@@H](CC[NH+]2[C@H]3CC(n4c(nnc4C)C(C)C)C[C@@H]2CC3)c2cccc2)CC1                                 |
| C2574 | OB | OB- | 27 | [C@@H]12c3c(cc(cc3O)CCCC)OC([C@@H]1CCC(=C2)C)(C)C                                                               |

|       |    |     |    |                                                                                                                  |
|-------|----|-----|----|------------------------------------------------------------------------------------------------------------------|
| C2575 | OB | OB+ | 27 | C1c1cccc(cc1)C1(O)N2C(=NCC2)c2c1cccc2                                                                            |
| C2576 | OB | OB+ | 27 | c12c(nc([nH]1)NC(=O)OC)ccc(c2)C(=O)c1cccc1                                                                       |
| C2577 | OB | OB+ | 26 | C1c1c(c(ccc1C)Cl)Nc1c(cccc1)C(=O)[O-]                                                                            |
| C2578 | OB | OB+ | 27 | c1cccc(c1)OC(C[NH+](C)C)Oc1cccc1                                                                                 |
| C2579 | OB | OB+ | 27 | c1c(ccc2c1OCO2)CC[C@@H]([NH2+][C[C@@H](c1cc(c(cc1)O)C(=O)N)O)C                                                   |
| C2580 | OB | OB- | 27 | [C@]12([C@H]([C@H]3[C@H](CC1)[C@@]1(C(=CC(=O)CC1)[C@H](C3)C)C)CC[C@@]2(C(=O)C)O)C                                |
| C2581 | OB | OB- | 27 | [C@]12([C@](CC[C@H]1[C@H]1[C@H](CC2)[C@@]2(C(=CC(=O)CC2)[C@H](C1)C)C)(C(=O)C)OC(=O)C)C                           |
| C2582 | OB | OB+ | 26 | [O-]C(=O)c1c(cccc1)Nc1c(ccc1)C)C                                                                                 |
| C2583 | OB | OB+ | 27 | c12c(c(ccn1)C(F)(F)F)[C@@H]([C@H]1[NH2+][CCCC1)O)cccc2C(F)(F)F                                                   |
| C2584 | OB | OB- | 27 | N1([C@H](C(=O)NCc2ccc(cc2)C(=N)N)CC1)C(=O)[C@@H](C1CCCCC1)[NH2+][CC(=O)[O-]                                      |
| C2585 | OB | OB- | 27 | c12c(ccc(c1)OC)N=C[C@H]2CCNC(=O)C                                                                                |
| C2586 | OB | OB+ | 27 | S1(=O)(=O)c2c(cccc2)C(=C(N1C)C(=O)Nc1sc(en1)C)O                                                                  |
| C2587 | OB | OB+ | 27 | N(c1ccc(cc1)C[C@H](C(=O)[O-])[NH3+])(CCCC)CCCI                                                                   |
| C2588 | OB | OB+ | 27 | [NH3+]C12CC3(CC(C1)(CC(C3)C2)C)C                                                                                 |
| C2589 | OB | OB+ | 27 | c1cccc(c1)C1(C(=O)OCC)CC[NH+](CC1)C                                                                              |
| C2590 | OB | OB+ | 27 | c12c([nH]c(c1)C)cccc2OC[C@H](C[NH2+](C)C)O                                                                       |
| C2591 | OB | OB+ | 27 | O=C(Nc1c(cccc1)C)C1[NH+](CCCC1)C                                                                                 |
| C2592 | OB | OB- | 27 | [C@@]1(c2cc(ccc2)O)(C[NH+](CCCC1)C)CC                                                                            |
| C2593 | OB | OB- | 27 | c12c(nc[nH]1)[nH]cnc2=S                                                                                          |
| C2594 | OB | OB- | 27 | [C@@H]12N(C=C([C@@H]1C)S[C@@H]1[NH2+][C@@H](CC1)C(=O)N(C)C)C(=O)[O-]C(=O)[C@@H]2[C@H](O)C                        |
| C2595 | OB | OB+ | 27 | c1c(ccc(c1C(=O)[O-])O)N                                                                                          |
| C2596 | OB | OB+ | 27 | C(S(=O)(=O)[O-])CS                                                                                               |
| C2597 | OB | OB+ | 27 | c12e3cccc1n(cc2C[C@@H]1[C@@H]3C[C@H](C[NH+](C)C)CNC(=O)OCc1cccc1)C                                               |
| C2598 | OB | OB+ | 27 | C(=N)(N(C)C)NC(=N)N                                                                                              |
| C2599 | OB | OB+ | 27 | c1cc(c2c(c1)C(=C)[C@@H]1[C@@H](C2=O)[C@H]([C@]2([C@@H]([C@H]1C)[C@@H]([C@H]([C@@H](C2=O)C(=O)N)O)[NH+](C)C)O)O)O |
| C2600 | OB | OB+ | 27 | C(c1cccc1)(c1cccc1)(C(=O)CC)C[C@H]([NH+](C)C)C                                                                   |
| C2601 | OB | OB+ | 26 | c1(ccccc1)C(c1cccc1)(CC([NH+](C)C)C)C(CC)OC(=O)C                                                                 |
| C2602 | OB | OB+ | 27 | c1(ccccc1)C[C@@H]([NH2+])C                                                                                       |
| C2603 | OB | OB- | 27 | N(c1ncccc1)(Cc1sccc1)CC[NH+](C)C                                                                                 |
| C2604 | OB | OB+ | 27 | n1(c(=S)[nH]cc1)C                                                                                                |
| C2605 | OB | OB+ | 27 | c12c(ncc(n1)CN(c1ccc(cc1)C(=O)N[C@H](C(=O)[O-])CCC(=O)O)C)nc(nc2N)N                                              |
| C2606 | OB | OB+ | 27 | [C@@](C(=O)[O-])(Cc1cc(c(cc1)O)O)([NH3+])C                                                                       |
| C2607 | OB | OB+ | 27 | c1cc2c3c(c1)C1=C[C@H](C[NH+])([C@@H]1Cc3c[nH]2)C)C(=O)N[C@@H](CC)CO                                              |
| C2608 | OB | OB+ | 27 | C1CCC[C@@H]([NH2+])1[C@@H](c1cccc1)C(=O)OC                                                                       |
| C2609 | OB | OB+ | 27 | c1(ccccc1)C1(C(=O)NC(=O)N(C1=O)C)CC                                                                              |
| C2610 | OB | OB+ | 27 | [C@]12([C@H]([C@H]3[C@H]([C@H](C1)O)[C@@]1(C(=CC(=O)C=C1)[C@H](C3)C)C)CC[C@@]2(C(=O)CO)O)C                       |
| C2611 | OB | OB- | 27 | c12c3cccc1n(cc2C[C@@H]1C3=C[C@H](C[NH+](C)C)C(=O)N[C@H](CO)CC)C                                                  |
| C2612 | OB | OB- | 27 | S1[C@H]2N([C@H](C1(C)C)C(=O)[O-])C(=O)[C@H]2NC(=O)c1c(cccc1OC)OC                                                 |
| C2613 | OB | OB+ | 27 | c1(c(cc(c(c1)Cl)N)OC)C(=O)NCC[NH+](CC)CC                                                                         |
| C2614 | OB | OB+ | 27 | c12c(cc(c(c1)S(=O)(=O)N)Cl)N[C@H](N(C2=O)c1c(cccc1)C)C                                                           |
| C2615 | OB | OB- | 27 | N1(c2c(ccc(c2)S(=O)(=O)C)Sc2c1cccc2)CCC[NH+](C)CC(C1)C(=O)N                                                      |
| C2616 | OB | OB+ | 27 | c1(ccc(cc1)CCOC)OC[C@@H](C[NH2+](C)C)O                                                                           |
| C2617 | OB | OB+ | 27 | n1(c(enc1C)[N+](=O)[O-])CCO                                                                                      |
| C2618 | OB | OB+ | 27 | c1(c(cccc1)C)OC[C@H]([NH3+])C                                                                                    |
| C2619 | OB | OB+ | 27 | N12[C@@H](c3c(cccc3)Cc3c1cccc3)C[NH+](CC2)C                                                                      |
| C2620 | OB | OB+ | 27 | [C@H]1([C@@](CCc2c1ccc(c2)F)(OC(=O)CC)CC[NH+](CCCc1[nH]c2c(n1)cccc2)C)C)C                                        |



|       |    |     |    |                                                                                                                                                                                       |
|-------|----|-----|----|---------------------------------------------------------------------------------------------------------------------------------------------------------------------------------------|
| C2667 | OB | OB+ | 27 | <chem>n1(c2c(c(ccc2)C)[nH]c(=O)c2c1nccc2)C1CC1</chem>                                                                                                                                 |
| C2668 | OB | OB+ | 27 | <chem>c12c(cccc1OC[C@H](C[NH2+]C(C)C)O)CCCN2C(=O)c1cnccc1</chem>                                                                                                                      |
| C2669 | OB | OB+ | 27 | <chem>c1(c(c(cc(c1C(=O)OC)C)[N+](=O)[O-])C(=O)OCC[NH+](Cc1cccc1)C)C1C=C(NC(=C1)C)C</chem>                                                                                             |
| C2670 | OB | OB- | 27 | <chem>Br1cc(ene1)C(=O)OC[C@H]1C[C@@]2(OC)[C@H]([NH+](C1)C)Cc1c3e2cccc3n(c1)C</chem>                                                                                                   |
| C2671 | OB | OB+ | 27 | <chem>c1(cnccc1)C(=O)NCCO[N+](=O)[O-]</chem>                                                                                                                                          |
| C2672 | OB | OB+ | 27 | <chem>[C@H]1(c2cnccc2)[NH+](CCC1)C</chem>                                                                                                                                             |
| C2673 | OB | OB+ | 27 | <chem>FC(F)(F)c1cc(cc(c1)NC(=O)c1cc(c(cc1)C)Ne1nc(cen1)c1cccnc1)n1cc(nc1)C</chem>                                                                                                     |
| C2674 | OB | OB+ | 27 | <chem>FC(F)(F)c1cc(ccc1[N+](=O)[O-])N1C(=O)C(NC1=O)(C)C</chem>                                                                                                                        |
| C2675 | OB | OB+ | 27 | <chem>s1c(ncc1[N+](=O)[O-])NC(=O)c1c(cccc1)OC(=O)C</chem>                                                                                                                             |
| C2676 | OB | OB+ | 27 | <chem>FC(F)(F)c1cc(c(c1)C(=O)C1C(=O)CCCC1=O)[N+](=O)[O-] c12c(ccc(c1)[N+](=O)[O-])NC(=O)CN=C2c1cccc1 N1(C(=O)NC(=O)C1)/N=C/c1oc(cc1)[N+](=O)[O-]</chem>                               |
| C2677 | OB | OB+ | 27 | <chem>C(CO[N+](=O)[O-])(CO[N+](=O)[O-])O[N+](=O)[O-]</chem>                                                                                                                           |
| C2678 | OB | OB+ | 27 | <chem>c1(nc(sc1)C[NH+](C)C)CSCCN/C(=C/[N+](=O)[O-])/NC</chem>                                                                                                                         |
| C2679 | OB | OB- | 27 | <chem>[NH+]1[C[C@H](c2c(c(ccc2)N)C1)c1cccc1)C</chem>                                                                                                                                  |
| C2680 | OB | OB+ | 27 | <chem>c12c(ccc(c1)Cl)NC(=O)CN=C2c1cccc1</chem>                                                                                                                                        |
| C2681 | OB | OB+ | 27 | <chem>c1(cc(c(cc1)O)O)[C@H](C[NH3+])O</chem>                                                                                                                                          |
| C2682 | OB | OB+ | 27 | <chem>[C@]12([C@@H]([C@@H]3[C@@H](CC1)[C@H]1C(=CC(=O)CC1)CC3)CC[C@]2(C#C)O)C</chem>                                                                                                   |
| C2683 | OB | OB- | 27 | <chem>c1(cc(ccc1)O)[C@H](C[NH3+])O</chem>                                                                                                                                             |
| C2684 | OB | OB+ | 27 | <chem>c1(cccc(c1)C(F)(F)F)CC(C)[NH3+]</chem>                                                                                                                                          |
| C2685 | OB | OB- | 27 | <chem>c12c(cc(c(c1)N1CC[NH2+]CC1)F)c(=O)c(en2CC)C(=O)[O-]</chem>                                                                                                                      |
| C2686 | OB | OB+ | 27 | <chem>[C@]12([C@@]([C@]1[C@H]1[C@H]1[C@H](C=C2)[C@@H]2C(=CC(=O)CC2)CC1)(C#C)O)CC</chem>                                                                                               |
| C2687 | OB | OB+ | 27 | <chem>c1ccc2c(c1)CCc1c(cccc1)C2=CCC[NH2+]C</chem>                                                                                                                                     |
| C2688 | OB | OB+ | 27 | <chem>c1c(cccn1)/C(=C/C[NH2+]C)/c1ccc(cc1)Br</chem>                                                                                                                                   |
| C2689 | OB | OB+ | 27 | <chem>[C@@H]1(c2c(c3c(cc2CC[NH+]1C)OCO3)OC)C1c2c(c(c(cc2)OC)OC)C(=O)O1</chem>                                                                                                         |
| C2690 | OB | OB+ | 27 | <chem>O1C([C@H](OC)[C@@H](OC(=O)N)[C@H](O)[C@H]1O)c1c(c2c(cc1)c(=O)c(c(o2)O)NC(=O)c1cc(c(cc1)O)CC=C(C)C)(C)C</chem>                                                                   |
| C2691 | OB | OB+ | 27 | <chem>e12c(c[nH]c1cccc2)C[C@H]1C(=O)N[C@@H](C(=O)N[C@H](C(=O)N[C@H](C(=O)N[C@H](C@H)(O)CO)CSSC[C@@H](C(=O)N[C@H](C(=O)N1)Cc1cccc1)NC(=O)[C@@H](Cc1cccc1)[NH3+])[C@H](O)C)CCCCN</chem> |
| C2692 | OB | OB- | 27 | <chem>c12c3c(c(cc1c(=O)c(en2[C@H](CO3)C)C(=O)[O-])F)N1CC[NH+](CC1)C</chem>                                                                                                            |
| C2693 | OB | OB- | 27 | <chem>C1(=Ne2c(cccc2)Ne2c1cc(s2)C)N1CC[NH+](CC1)C</chem>                                                                                                                              |
| C2694 | OB | OB+ | 27 | <chem>c1(ccccc1c1nn[n-]n1)c1ccc(cc1)Cn1c(nc(c1C(=O)OCc1c(oc(=O)o1)C)C(O)(C)C)CCC</chem>                                                                                               |
| C2695 | OB | OB+ | 27 | <chem>N(=N\c1cc(c(cc1)O)C(=O)O)/c1cc(c(cc1)O)C(=O)[O-]</chem>                                                                                                                         |
| C2696 | OB | OB+ | 27 | <chem>c12c3c(n(c1CC[C@H](C2=O)Cn1cncc1)C)cccc3</chem>                                                                                                                                 |
| C2697 | OB | OB+ | 27 | <chem>c1(cc(cc(c1)[C@H](C[NH2+]C(C)C)O)O</chem>                                                                                                                                       |
| C2698 | OB | OB+ | 27 | <chem>O1[C@H]([C@H](CCCCC)C1=O)C[C@H](OC(=O)C(NC=O)CC(C)C)CCCCCCCC</chem>                                                                                                             |
| C2699 | OB | OB+ | 27 | <chem>[C@@H](c1c(cccc1)C)(c1cccc1)OCC[NH+](C)C</chem>                                                                                                                                 |
| C2700 | OB | OB- | 27 | <chem>C1=C(CC(C)1OC(CC)CC)NC(=O)C[NH3+])C(=O)OCC</chem>                                                                                                                               |
| C2701 | OB | OB+ | 27 | <chem>[c@@]12([c@@][C][c@@H]([C@H]1O)O)[c@@H]1[C@@H]([C@H]([C@H]([C@H](O1)C)O)O)CC[C@H]1[C@@H]2[C@@H]([C@]2([C@@]1)CC[C@H]2C1=CC(=O)OC1)O)O)CO</chem>                                 |
| C2702 | OB | OB+ | 27 | <chem>O[C@@]1([C@@]2([C@H]([C@H]3[C@@H]([C@@]4([C@@H](CC3)CC(=O)OC4)C)CC2)CC1)C)C</chem>                                                                                              |
| C2703 | OB | OB- | 27 | <chem>c1(c(nc(o1)CCC(=O)[O-])c1cccc1)c1cccc1</chem>                                                                                                                                   |
| C2704 | OB | OB+ | 27 | <chem>c12c(ccc(c1)Cl)NC(=O)[C@@H](N=C2c1cccc1)O</chem>                                                                                                                                |
| C2705 | OB | OB+ | 27 | <chem>c1cccc2c1C(=N)Cc1c(cccc1)N2C(=O)N</chem>                                                                                                                                        |
| C2706 | OB | OB+ | 27 | <chem>[C@@H]12[C@@H]([C@@H]3CC[C@H]1[N+])3(C)CC)OC(=O)[C@@H](c1cccc1)CO)O2</chem>                                                                                                     |
| C2707 | OB | OB+ | 27 | <chem>c1(c(cccc1)OCC=C)OC[C@@H](C[NH2+]C(C)C)O</chem>                                                                                                                                 |
| C2708 | OB | OB- | 27 | <chem>OCC[N+](C)C</chem>                                                                                                                                                              |
| C2709 | OB | OB+ | 27 | <chem>c1cccc(c1)[C@](C(=O)OCC#CC[NH+](CC)CC)(C1CCCCC1)O</chem>                                                                                                                        |
| C2710 | OB | OB+ | 27 | <chem>[C@]123[C@@]4([C@@H](Cc5c1c(c(cc5)OC)O)[C@H]2C(=O)CC4)[NH+](CC3)C)O</chem>                                                                                                      |
| C2711 | OB | OB- | 27 |                                                                                                                                                                                       |
| C2712 | OB | OB+ | 27 |                                                                                                                                                                                       |

|       |    |     |    |                                                                                                                                                                                     |
|-------|----|-----|----|-------------------------------------------------------------------------------------------------------------------------------------------------------------------------------------|
| C2713 | OB | OB+ | 27 | c1(cc(ccc1)OC)C(=O)CC[NH2+][C@@H]([C@@H](c1ccccc1)O)C                                                                                                                               |
| C2714 | OB | OB- | 27 | Oc1c(cc(c(c1C)CC1=NCCN1)C)C(C)C                                                                                                                                                     |
| C2715 | OB | OB- | 27 | O1[C@@H]2[C@]34[C@](O)([C@H]([NH+](CC3)C)Cc3c4c1c(cc3)O)CCC2=O                                                                                                                      |
| C2716 | OB | OB+ | 27 | [C@]12[C@@H]([C@H]([C@H]3C(=C(c4c(ccc4O)[C@]3(O)C)O)C1=O)O)[C@@H](C(=C(C2=O)C(=O)N)O)[NH+](C)C)O                                                                                    |
| C2717 | OB | OB- | 27 | [C@@H]12[C@](C(=O)[C@@H](C3=C([C@H](C[C@]3(C)C)([C@H]1OC(=O)c1ccccc1)O)OC(=O)[C@@H]([C@H](c1ccccc1)NC(=O)c1ccccc1)O)C)OC(=O)C([C@H](C[C@@H]1[C@]2(CO1)OC(=O)C)O)C                   |
| C2718 | OB | OB+ | 27 | Fe1cc2onc(c2cc1)C1CC[NH+](CC1)CCc1c(nc2n(c1=O)CCCC2)O                                                                                                                               |
| C2719 | OB | OB+ | 27 | c12c3cccc1CCC[C@@H]2CN(C3=O)[C@H]1C2CC[NH+](C1)CC2                                                                                                                                  |
| C2720 | OB | OB- | 27 | [C@]12[C@H]([C@H]3[C@H](CC1)[C@@]1([C@H](CC3)C[C@H]([C@H](C1)[N+]1(CCCCC1)C)OC(=O)C)C)[C@H]([C@@H]2OC(=O)C)[N+]1(CCCCC1)C)C                                                         |
| C2721 | OB | OB+ | 27 | c12c(nc([nH]1)S(=O)C)c1c(ccn1)OC)OC)cc(cc2)OC(F)F                                                                                                                                   |
| C2722 | OB | OB+ | 27 | c12c(cc(c(c1)OC)OC)ccnc2Cc1cc(c(cc1)OC)OC                                                                                                                                           |
| C2723 | OB | OB+ | 27 | OC([C@H]/C=C/[C@H]([C@@H]1[C@@]2([C@@H](CC1)/C(=C/C=C\1/[C@@H](O)C[C@H](O)C1)/CCC2)C)C)C(C)C                                                                                        |
| C2724 | OB | OB- | 27 | [C@H]1([C@@H]([C@@H]([C@H]([C@@H]1O)N)O)[C@H]([C@@H]([C@@H]([C@@H]([C@@H]1O)CO)O)O)[NH3+])O)[C@H]1[C@@H]([C@@H]([C@@H]([C@@H]1O)CO)O)[C@H]1[C@@H]([C@@H]([C@@H]([C@@H]1O)CN)O)O)N)O |
| C2725 | OB | OB+ | 27 | [C@@H]1([C@H](COc2cc3c(cc2)OCO3)C[NH2+])CC1)c1ccc(cc1)F                                                                                                                             |
| C2726 | OB | OB+ | 27 | c1(c(cc2c(c1)n(cc(c2=O)C(=O)[O-])CC)F)N1CC[NH+](CC1)C                                                                                                                               |
| C2727 | OB | OB+ | 27 | c1(c(cccc1)OC[C@H](C[NH2+](C(C)C)O)C1CCCC1                                                                                                                                          |
| C2728 | OB | OB+ | 27 | c12c(nen1CCC(CO)CO)c(=O)nc([nH]2)N                                                                                                                                                  |
| C2729 | OB | OB+ | 27 | c1(c(nc(c(c1OC)Cl)OC)C(Cl)Cl)Cl                                                                                                                                                     |
| C2730 | OB | OB+ | 27 | [C@H](C(S)(C)C)(C(=O)[O-])[NH3+]                                                                                                                                                    |
| C2731 | OB | OB+ | 27 | N12[C@@H]([C@@H](C1=O)NC(=O)Cc1ccccc1)SC([C@@H]2C(=O)[O-])(C)C                                                                                                                      |
| C2732 | OB | OB+ | 27 | N12[C@@H](C(S)[C@H]1[C@H](C2=O)NC(=O)COc1ccccc1)(C)C(=O)[O-]                                                                                                                        |
| C2733 | OB | OB+ | 27 | C(C(CO[N+](=O)[O-])(CO[N+](=O)[O-])CO[N+](=O)[O-])O[N+](=O)[O-]                                                                                                                     |
| C2734 | OB | OB- | 27 | c1(ccc(cc1)OCCCCCOc1ccc(cc1)C(=N)N)C(=N)N                                                                                                                                           |
| C2735 | OB | OB- | 27 | [C@@]12(c3c(ccc(c3)O)C[C@H]([C@H]1C)[NH+](CC2)CC=C(C)C)C                                                                                                                            |
| C2736 | OB | OB+ | 27 | C1(C(=O)NC(=O)NC1=O)(C(CCC)C)CC                                                                                                                                                     |
| C2737 | OB | OB+ | 27 | N1(c2c(ccc2)C[C@H]1C(=O)[O-])C(=O)[C@@H](C[C@H](C(=O)OCC)C)C                                                                                                                        |
| C2738 | OB | OB- | 26 | S(=O)(=O)O[C@H]1[C@H](O[C@@H]2OC[C@@H](O)[C@H](OS(=O)(=O)O)[C@H]2OS(=O)(=O)[O-])CO[C@@H](O)[C@@H]1OS(=O)(=O)O)O                                                                     |
| C2739 | OB | OB+ | 27 | c12c(nen1C)n(c(=O)n(c2=O)CCCC(=O)C)C                                                                                                                                                |
| C2740 | OB | OB+ | 27 | c12c3cccc1[nH]cc2C[C@@H]1[C@@H]3C[C@H](C[NH+]1CCC)CSC                                                                                                                               |
| C2741 | OB | OB+ | 27 | [NH2+]1C(CC(C2CCCC2)C2CCCC2)CCCC1                                                                                                                                                   |
| C2742 | OB | OB+ | 27 | N1([C@@H]2[C@H](C[C@H]1C(=O)[O-])CCCC2)C(=O)[C@@H]([NH2+][C@H](C(=O)OCC)CCC)C                                                                                                       |
| C2743 | OB | OB+ | 27 | ClC(=CC1C(C1C(=O)OCc1cc(ccc1)Oc1ccccc1)(C)C)Cl                                                                                                                                      |
| C2744 | OB | OB+ | 27 | N1(c2c(ccc(c2)Cl)Se2c1cccc2)CCC[NH+]1CCN(CC1)CCO                                                                                                                                    |
| C2745 | OB | OB+ | 27 | c1(ccc(cc1)OCC)NC(=O)C                                                                                                                                                              |
| C2746 | OB | OB+ | 27 | c1ccc(cc1)C1([NH+]2CCCC2)CCCC1                                                                                                                                                      |
| C2747 | OB | OB+ | 27 | N(=C(\N=C(N)N)/N)/CCc1ccccc1                                                                                                                                                        |
| C2748 | OB | OB+ | 27 | C1(C(=O)c2c(cccc2)C1=O)c1ccccc1                                                                                                                                                     |
| C2749 | OB | OB+ | 27 | [C@@H](c1ncccc1)(c1ccccc1)CC[NH+](C)C                                                                                                                                               |
| C2750 | OB | OB+ | 27 | C1(c2ccccc2)(C(=O)NC(=O)NC1=O)CC                                                                                                                                                    |
| C2751 | OB | OB- | 27 | [C@]1(c2ccccc2)(C(=O)OCC)CC[N@@H+](CC1)CC[C@@H](c1ccccc1)O                                                                                                                          |
| C2752 | OB | OB+ | 27 | ClCC[NH+](C(COc1ccccc1)C)Cc1ccccc1                                                                                                                                                  |
| C2753 | OB | OB+ | 27 | N1(N(C(=O)C(=O)[C@@H]1CCCC)c1ccccc1)c1ccccc1                                                                                                                                        |
| C2754 | OB | OB+ | 27 | c1ccc(c1)CCCC(=O)[O-]                                                                                                                                                               |
| C2755 | OB | OB+ | 27 | c1(cc(ccc1)O)[C@H](C[NH2+])C)O                                                                                                                                                      |
| C2756 | OB | OB+ | 27 | C1(c2ccccc2)(c2ccccc2)C(=O)NNC1=O                                                                                                                                                   |
| C2757 | OB | OB- | 27 | c12c(ccc(c1)OC(=O)NC)N([C@@H]1[C@H]2CC[NH+]1)C)C                                                                                                                                    |
| C2758 | OB | OB+ | 27 | c1ccc2c(c1)oc1c(ccc(c1C[NH+]1CCCC1)OC)c2=O                                                                                                                                          |

|       |    |     |    |                                                                                                                                                                              |
|-------|----|-----|----|------------------------------------------------------------------------------------------------------------------------------------------------------------------------------|
| C2759 | OB | OB+ | 27 | n1(c2c(cccc2)[nH]c1=O)C1CC[NH+](CC1)CCC(c1ccc(cc1)F)c1ccc(cc1)F                                                                                                              |
| C2760 | OB | OB+ | 27 | c1c(ccnc1)N/C(=N/C#N)/NC(C(C)(C)C)C                                                                                                                                          |
| C2761 | OB | OB+ | 27 | c12c(cccc1[nH]cc2)OC[C@@H](C[NH2+])C(C)C)O                                                                                                                                   |
| C2762 | OB | OB+ | 27 | [C@]1(Cc2ccc(cc2)OCCe2ncc(cc2)CC)(SC(=O)NC1)C=O                                                                                                                              |
| C2763 | OB | OB+ | 27 | c12c(cnc(n1)N1CC[NH2+])CC1)c(=O)c(en2CC)C(=O)[O-]                                                                                                                            |
| C2764 | OB | OB- | 27 | N12[C@@@H]([C@@@H](C1=O)NC(=O)[C@@@H](c1ccccc1)NC(=O)N1C(=O)C(=O)N(CC1)CC)SC([C@@@H]2C(=O)[O-])(C)C                                                                          |
| C2765 | OB | OB+ | 27 | c12c(ccc(c1)S(=O)(=O)N(C)C)Sc1c(cccc1)N2CCC[NH+]1CCC(CC1)CCO                                                                                                                 |
| C2766 | OB | OB+ | 27 | c1cc(ccc1F)n1nc(c(c1)c1ccc(cc1)Cl)CC(=O)[O-]                                                                                                                                 |
| C2767 | OB | OB- | 27 | n1(c2c(cccc2)c(=O)[nH]c2c1nccc2)C(=O)C[NH+]1CCN(CC1)C                                                                                                                        |
| C2768 | OB | OB+ | 27 | c1(c(cc(cc1S(=O)(=O)N)C(=O)[O-])N1CCCC1)Oe1ccccc1                                                                                                                            |
| C2769 | OB | OB+ | 27 | c12c(c(c(nc1N)N)C)ncc(n2)Cc1c(ccc(c1)OC)OC                                                                                                                                   |
| C2770 | OB | OB+ | 27 | [C@@](c1ncccc1)(c1ccccc1)(CCC[NH+]1[C@@@H](CCC[C@@@H]1C)C)O                                                                                                                  |
| C2771 | OB | OB+ | 27 | S1(=O)(=O)c2c(cccc2)C(=C(N1C)C(=O)Nc1ncccc1)O                                                                                                                                |
| C2772 | OB | OB+ | 27 | c1(c([nH]c(=O)[nH]1)CC)C(=O)c1ccncc1                                                                                                                                         |
| C2773 | OB | OB+ | 27 | S1[C@H]2N([C@H](C1(C)C)C(=O)OCOC(=O)C(C)C)C(=O)[C@H]2NC(=O)C([NH3+])c1ccccc1                                                                                                 |
| C2774 | OB | OB+ | 27 | c1csc2c1/C(=C\1/CC[NH+](CC1)C)/c1c(cccc1)CC2                                                                                                                                 |
| C2775 | OB | OB- | 27 | O(C(c1c(e/2=C/C3=N/C(=C/C4=N/C(=C/e5[nH]c(e5C(O)C)C=C\1/[nH]2)C=C4CCC(=O)O)C)C(c1e/2=C/c3[nH]c(e3C(O)C)C=C/3/N=C(=C/C4=N=C(=C/e1/[nH]2)C=C4CCCC(=O)[O-])C)C(=C3)CCC(=O)O)C)C |
| C2776 | OB | OB+ | 27 | Fc1c(ccc(c1)F)C1(OCC(C1)COc1ccc(cc1)N1CCN(CC1)c1ccc(cc1)n1c(=O)n(nc1)C([C@@@H](O)C)CC)Cn1ncnc1                                                                               |
| C2777 | OB | OB+ | 27 | c1(ccc(cc1)NC(=O)C)[C@H](C[NH2+])C(C)C)O                                                                                                                                     |
| C2778 | OB | OB+ | 27 | [C@@@H]1(CCc2c(sc(n2)N)C1)[NH2+]CCC                                                                                                                                          |
| C2779 | OB | OB- | 27 | [C@H]12[C@H](C[C@@@H](C=C1C=C[C@@@H]([C@@@H]2CC[C@H](C[C@H](CC(=O)[O-])O)O)C)O)OC(=O)[C@H](CC)C                                                                              |
| C2780 | OB | OB- | 27 | [C@H]12N(C(=O)CN(C1)C(=O)C1CCCCC1)CCc1c2ccccc1                                                                                                                               |
| C2781 | OB | OB+ | 27 | c12c(c(nc(n1)N1CCN(CC1)C(=O)c1occc1)N)cc(c(c2)OC)OC                                                                                                                          |
| C2782 | OB | OB+ | 27 | [C@]12([C@@])(C(=O)CO)CC[C@H]1[C@H]1[C@H]([C@H](C2)O)[C@@]2(C(=CC(=O)C=C2)CC1)C)O)C                                                                                          |
| C2783 | OB | OB+ | 27 | [C@]12([C@@])(C(=O)CO)CC[C@H]1[C@H]1[C@H]([C@H](C(=O)C2)[C@@]2(C(=CC(=O)C=C2)CC1)C)O)C                                                                                       |
| C2784 | OB | OB+ | 27 | [O-]C(=O)C[C@H](CC(C)C)C[NH3+]                                                                                                                                               |
| C2785 | OB | OB+ | 27 | c1(ccc(cc1)O)OC[C@H](C[NH2+])C(C)C)O                                                                                                                                         |
| C2786 | OB | OB- | 27 | C(=C1[C@H]([N+](CC1)(CC)CC)C)(c1ccccc1)c1ccccc1                                                                                                                              |
| C2787 | OB | OB+ | 27 | c1(c2c(cc(c1)OC)ccn2)N[C@@H](CCC[NH3+])C                                                                                                                                     |
| C2788 | OB | OB+ | 27 | C1(c2ccccc2)(C(=O)NCNC1=O)CC                                                                                                                                                 |
| C2789 | OB | OB+ | 27 | S(=O)(=O)(c1ccc(cc1)C(=O)[O-])N(CCC)CCC                                                                                                                                      |
| C2790 | OB | OB- | 27 | c1(c(c(cc(c1)SC(Sc1cc(c(c1)C(C)C)O)C(C)(C)C)C(C)C)C(C)C)O)C(C)(C)C                                                                                                           |
| C2791 | OB | OB+ | 27 | c1(ccc(cc1)N)C(=O)NCC[NH+](CC)CC                                                                                                                                             |
| C2792 | OB | OB- | 27 | O(CC[NH+](CC)CC)C(=O)c1ccc(cc1)N                                                                                                                                             |
| C2793 | OB | OB+ | 27 | O[C@@@H]([C@@@H]([NH2+])C(C)C)CC)c1c2c(c(cc1)O)[nH]c(=O)cc2                                                                                                                  |
| C2794 | OB | OB- | 27 | N1(c2c(ccc(c2)Cl)Sc2c1ccccc2)CCC[NH+]1CCN(CC1)C                                                                                                                              |
| C2795 | OB | OB+ | 27 | O[C@@](CC[NH+]1CCCC1)(c1ccccc1)C1CCCCC1                                                                                                                                      |
| C2796 | OB | OB+ | 27 | [C@]12([C@@@H]([C@H]3[C@H](CC1)[C@@]1(C(=CC(=O)CC1)CC3)C)CC[C@H]2C(=O)C)C                                                                                                    |
| C2797 | OB | OB+ | 27 | Clc1ccc(cc1)N/C(=N/C(=N/C(C)C)/N)/N                                                                                                                                          |
| C2798 | OB | OB- | 27 | S1c2c(cccc2)N(CCC[NH+](C)C)c2c1ccccc2                                                                                                                                        |
| C2799 | OB | OB+ | 27 | N1(c2c(cccc2)Sc2c1ccccc2)C[C@H]([NH+](C)C)C                                                                                                                                  |
| C2800 | OB | OB- | 27 | c1(c(cccc1)OC[C@H](C[NH2+])CCC)O)C(=O)CCc1ccccc1                                                                                                                             |
| C2801 | OB | OB+ | 27 | c1ccc2c(c1)N(c1c(ccc(c1)C(=O)CC)S2)C[C@@@H](C)[NH+](C)C                                                                                                                      |
| C2802 | OB | OB+ | 27 | c1ccc(cc1)C[C@](c1ccccc1)(OC(=O)CC)[C@H](C)C[NH+](C)C                                                                                                                        |
| C2803 | OB | OB+ | 27 | c1(c2c(ccc1)ccccc2)[C@H]([C@@@H]([NH2+])C(C)C)C)O                                                                                                                            |
| C2804 | OB | OB+ | 27 | c1(cc(=O)[nH]c(=S)[nH]1)CCC                                                                                                                                                  |







|       |    |     |    |                                                                                                                                    |
|-------|----|-----|----|------------------------------------------------------------------------------------------------------------------------------------|
| C2897 | OB | OB+ | 27 | c12c([nH]nc1C(=O)N)c(=O)n(nn2)C                                                                                                    |
| C2898 | OB | OB+ | 27 | [C@@H]1(c2c(cc3c(e2)OCO3)[C@H]([C@H]2[C@H]1C(=O)OC2)O[C@H]1[C@@H]([C@H]([C@H]2[C@H](O1)CO[C@](O2)(c1sccc1)C)O)O)c1cc(c(c1)OC)O)OC  |
| C2899 | OB | OB+ | 27 | S1(=O)(=O)c2c(scc2)C=C(N1C)C(=O)Nc1cccc1                                                                                           |
| C2900 | OB | OB+ | 27 | c1(c(cc2c(c1)nc(nc2N)N1CCN(CC1)C(=O)[C@@H]1CCCO1)OC)OC                                                                             |
| C2901 | OB | OB+ | 27 | [NH+](Cc1c2c(ccc1)cccc2)(C/C=C/C#CC(C)(C)C)C                                                                                       |
| C2902 | OB | OB- | 27 | c1(cc(cc(c1)O)O)[C@@H](C[NH2+](C(C)(C)C)O                                                                                          |
| C2903 | OB | OB- | 27 | C([C@H]1CC[N@@H+](CC1)CCCC[C@@H](c1cccc1)C(C)(C)O)(c1cccc1)(c1cccc1)O                                                              |
| C2904 | OB | OB+ | 27 | c12c3cccc1[nH]cc2C[C@@H]1[C@@H]3C[C@@H](C[NH+](1)C)NC(=O)N(CC)CC                                                                   |
| C2905 | OB | OB+ | 27 | C(c1cccc1)(c1cccc1)C[C@@H]([NH2+](C(C)(C)C)C                                                                                       |
| C2906 | OB | OB+ | 27 | c12c(cccc1CCCS2)OC[C@H](C[NH2+](C(C)(C)C)O c1(ccc(cc1)CCO)c1ccc(cc1)CC(C(=O)[O-                                                    |
| C2907 | OB | OB+ | 27 | )]OCC)OS(=O)(=O)C                                                                                                                  |
| C2908 | OB | OB- | 27 | [C@]12([C@@H]3[C@H]([C@H]4[C@](CC3)([C@H](CC4)O)C)CCC1=CC(=O)CC2)C                                                                 |
| C2909 | OB | OB- | 27 | c12c(cc(c(c1)OC)OC)CC[NH+]1[C@H]2CC(=O)[C@H](C1)CC(C)C                                                                             |
| C2910 | OB | OB+ | 27 | [C@@]12([C@H]([C@@H](C(=C(C1=O)C(=O)N)O)[NH+](C)C)C[C@@H]1C(=C(c3c(cccc3O)[C@]1(O)C)O)C2=O)O                                       |
| C2911 | OB | OB+ | 27 | c12c([nH]cn1)c(=O)n(c(=O)n2)C                                                                                                      |
| C2912 | OB | OB- | 27 | s1c(c([n+](c1)Cc1c(nc(nc1)C)N)C)CCO                                                                                                |
| C2913 | OB | OB+ | 27 | c1ccc2c(c1)c(ccc2)N=C=S                                                                                                            |
| C2914 | OB | OB+ | 27 | S=c1nc([nH]c2nc[nH]c12)N                                                                                                           |
| C2915 | OB | OB+ | 27 | N1(c2c(ccc(c2)SC)Sc2c1cccc2)CC[C@H]1[NH+](CCCC1)C c1(c(cc(cc1)C[C@H](C(=O)[O-                                                      |
| C2916 | OB | OB+ | 27 | )]NH3+)]I)Oc1cc(c(c1)I)O)I                                                                                                         |
| C2917 | OB | OB+ | 27 | c12c(ccc(c1)Cl)N(c1c(cccc1)N(S2(=O)=O)C)CCCCC(=O)[O-]                                                                              |
| C2918 | OB | OB+ | 27 | C1(S(=O)(=O)CCCS1(=O)=O)(c1cc(c(cc1)OC)OC)CCCC[NH+](CCc1cc(c(cc1)OC)OC)C                                                           |
| C2919 | OB | OB+ | 26 | s1c(ccc1C(=O)c1cccc1)C(C)C(=O)[O-] [NH+]12[C@@H]([C@@H]([C@@H]1O)NC(=O)C(c1sccc1)C(=O)[O-])SC([C@@H]2C(=O)[O-                      |
| C2920 | OB | OB- | 27 | )](C)C                                                                                                                             |
| C2921 | OB | OB+ | 27 | c12c(scc1)CC[NH+](C2)Cc1c(ccc1)Cl                                                                                                  |
| C2922 | OB | OB- | 27 | O[C@@]12[C@@H](C[C@H]3C(=C(O)c4c(c(cc(c4O)NC(=O)CNC(C)(C)C)N(C)C)C3)C1=O)[C@H]([NH+](C)C)C(=O)/C(=C(/O)N)/C2=O                     |
| C2923 | OB | OB+ | 27 | C1=CCCC(C1[NH+](C)C)(C(=O)CCC)c1cccc1                                                                                              |
| C2924 | OB | OB+ | 27 | c1(c(nsn1)OC[C@H](C[NH2+](C(C)(C)O)N1CCOCC1                                                                                        |
| C2925 | OB | OB+ | 27 | n1(c(nc1C)[N+](=O)[O-])CCS(=O)(=O)CC                                                                                               |
| C2926 | OB | OB+ | 27 | C(=O)([C@@H](S)C)NCC(=O)[O-]                                                                                                       |
| C2927 | OB | OB- | 27 | s1c(ccc1)C(O)(C(=O)OC1C[C@@H]2[N+](C@@H)([C@H]3O[C@@H]23)C1)(C)C)c1sccc1                                                           |
| C2928 | OB | OB- | 27 | S(=O)(=O)(N[C@@H](Cc1ccc(cc1)O)CCCC1CC[NH2+](CC1)C(=O)[O-])CCCC                                                                    |
| C2929 | OB | OB+ | 27 | c1(c2c(ccc1Cl)nsn2)NC1=NCCN1                                                                                                       |
| C2930 | OB | OB- | 27 | [C@H]1([C@@H]([C@@H]([C@@H]([C@@H]1N)N)O[C@H]1[C@@H](C[C@@H]([C@@H](O1)CN)O)N)O)[C@H]1[C@@H]([C@@H]([C@@H]([C@@H](O1)CO)O)[NH3+])O |
| C2931 | OB | OB+ | 27 | c1cc(c(c(c1)C)NC(=O)[C@H]([NH3+])C)C                                                                                               |
| C2932 | OB | OB+ | 27 | c1(ccc(cc1)C)S(=O)(=O)[N-]C(=O)NCCCC                                                                                               |
| C2933 | OB | OB+ | 27 | c1(cc(c(c(c1)O)O)[N+](=O)[O-])C(=O)c1ccc(cc1)C                                                                                     |
| C2934 | OB | OB+ | 27 | c1(c(cccc1)Nc1c(ccc1)Cl)C(=O)[O-]                                                                                                  |
| C2935 | OB | OB+ | 27 | c1cc(cc(c1)OC[C@H](C[NH2+](C(C)O)C                                                                                                 |
| C2936 | OB | OB+ | 27 | c1c(c(cc(c1S(=O)C)C)OC)OC                                                                                                          |
| C2937 | OB | OB+ | 27 | c1(n(c(cc1)CC(=O)[O-])C)C(=O)c1ccc(cc1)C                                                                                           |
| C2938 | OB | OB+ | 27 | [C@H](c1c(ccc(c1)C)O)(c1cccc1)CC[NH+](C(C)C)C(C)C                                                                                  |
| C2939 | OB | OB+ | 27 | c12cc3c(c(=O)n1Cc1c2nc2c(c1)c(cc2)O)C[NH+](C)C)COC(=O)[C@@]3(CC)O c1(c(ccnc1)Nc1cc(ccc1)C)S(=O)(=O)[N-                             |
| C2940 | OB | OB+ | 27 | ]C(=O)NC(C)C                                                                                                                       |
| C2941 | OB | OB+ | 27 | C(=C(c1cccc1)/CCCl)(\c1ccc(cc1)OCC[NH+](C)C)/c1cccc1                                                                               |
| C2942 | OB | OB+ | 27 | [C@]1(c2cc(ccc2)OC)([C@@H](C[NH+](C)C)CCCC1)O                                                                                      |





|       |    |     |    |                                                                                                                                |
|-------|----|-----|----|--------------------------------------------------------------------------------------------------------------------------------|
| C3035 | OB | OB+ | 26 | Clc1cccc(cc1)OC(C(=O)OCC)(C)C                                                                                                  |
| C3036 | OB | OB+ | 26 | Clc1cccc1C([NH+])1CCc2secc2C1)C(=O)OC                                                                                          |
| C3037 | OB | OB+ | 27 | [C@H]1([C@@H]2[NH+])([C@H](C)[C@H]1OC(=O)c1cccc1)CC2)C(=O)OC                                                                   |
| C3038 | OB | OB+ | 27 | ClC1=CC2C(C3(C1=CC(=O)C1C3C1)C)CCC1(C2CCC1(O)C(=O)C)C                                                                          |
| C3039 | OB | OB- | 27 | O1CCc2cc(ccc12)CC[NH+]1CC(Cc1)C(C(=O)N)(c1cccc1)c1cccc1                                                                        |
| C3040 | OB | OB+ | 27 | S(=O)(=O)(N(CC(C)C)CC(O)C(NC(=O)OC1C2CCOC2OC1)Cc1cccc1)c1ccc(cc1)N                                                             |
| C3041 | OB | OB- | 26 | O=C(N(O)CCCCNC(=O)CCC(=O)N(O)CCCC[NH3+])CCC(=O)NCCCCCN(O)C(=O)C                                                                |
| C3042 | OB | OB+ | 27 | O1C2CC3C4C(C5(C(=CC(=O)C=C5)CC4)C)C(O)CC3(C)C2(N=C1C)C(=O)COC(=O)C                                                             |
| C3043 | OB | OB+ | 27 | FC(F)(F)c1cc(ccc1)CC([NH2+])CC(C)                                                                                              |
| C3044 | OB | OB+ | 26 | Clc1cc(ccc1Cl)C(=O)NC(CCC(=O)[O-])C(=O)N(CCCCC)CCCCO                                                                           |
| C3045 | OB | OB- | 27 | O(C)c1ccc2c(cc1)CC1C3C2(CC[NH+]1C)CCCC3                                                                                        |
| C3046 | OB | OB- | 26 | Ic1c(c(c(c(c1NC(=O)C)I)NC(=O)C)I)C(=O)[O-]                                                                                     |
| C3047 | OB | OB+ | 26 | Fe1en(C2OC(C)C(O)C2O)c(=O)[nH]c1=O                                                                                             |
| C3048 | OB | OB- | 27 | c12c(c(c3c(c1O)C)[C@]([C@H]3O[C@H]1O[C@H]([C@H]([C@H](C1)[NH3+])O)C)(C(=O)CO)O)O)C(=O)c1c(cccc1OC)C2=O                         |
| C3049 | OB | OB+ | 27 | O(C(C)(c1cccc1)c1ncccc1)CC[NH+](C)C                                                                                            |
| C3050 | OB | OB+ | 27 | O=C1CCC2(C3C(C4CCC(C(=O)C)C4(CC3)C)C=CC2=C1)C                                                                                  |
| C3051 | OB | OB+ | 26 | [O-]C(=O)C1=CC2=CCC3C(C2(CC1)C)CCC1(C3CCC1C(=O)NC(C)C)C                                                                        |
| C3052 | OB | OB- | 27 | S1CCCC(=O)NC(CCCNC(=N)N)C(=O)NCC(=O)NC(CC(=O)[O-])C(=O)NC(Cc2c3c([nH]c2)cccc3)C(=O)N2C(CCC2)C(=O)NC(C1)C(=O)N                  |
| C3053 | OB | OB+ | 26 | ClCCN(CCC1)C(=O)Oe1cc2c(cc1)C1C(CC2)C2CCC(OP(=O)(O)[O-])C2(CC1)C                                                               |
| C3054 | OB | OB+ | 26 | Clc1c(c(ccc1C(=O)C(=C)CC)OCC(=O)[O-])Cl                                                                                        |
| C3055 | OB | OB- | 27 | O=C(Nc1c(ccc1C)C)C([NH+])(CCC)CC(C)                                                                                            |
| C3056 | OB | OB+ | 26 | Oe1cc(ccc1)C(O)C[NH2+](C)                                                                                                      |
| C3057 | OB | OB+ | 27 | O(C)c1ccc(c(c(c1C)C)/C=C/C(=C/C(=O)OCC)/C)/C                                                                                   |
| C3058 | OB | OB- | 27 | Clc1c2c(cc(c1O)C)C(C[NH2+])CC2)c1ccc(cc1)O                                                                                     |
| C3059 | OB | OB+ | 26 | OC(C1CC[NH+])(CC1)CCCC(O)c1ccc(cc1)C(C(=O)[O-])(C)C(c1cccc1)c1cccc1                                                            |
| C3060 | OB | OB+ | 26 | Fe1c2c(cc(c1N1CC[NH+])(CC1)C)F)c(=O)c(cn2CCF)C(=O)[O-]                                                                         |
| C3061 | OB | OB+ | 27 | c1c(c(c(cc1)F)c1noc(c1C(=O)NC1C(=O)N2C1SC(C2(C(=O)[O-])C)(C)C)C)Cl                                                             |
| C3062 | OB | OB+ | 27 | O=c1[nH]c(nc2ncc(nc12)CNc1ccc(cc1)C(=O)NC(CCC(=O)O)C(=O)[O-])N                                                                 |
| C3063 | OB | OB+ | 27 | C=C1/[C@H]2[C@@]([C@@]3([C@H]([C@@]4([C@@H](CC3)[C@@H]([C@@H](CC4)O)C)C)[C@@H](C2)O)C)C([C@@H]1OC(=O)C)C(\C(=O)[O-])/CCC=C(C)C |
| C3064 | OB | OB+ | 26 | O1C2CC34C56C(OC(=O)C5O)OC3(C2(O)C(C)C1=O)C(=O)OC4CC6C(C)C                                                                      |
| C3065 | OB | OB+ | 26 | O1C2C(O)(C34OC5OC(=O)C(O)C65C3(C(OC4=O)CC6C(C)C)C2O)C(C)C1=O                                                                   |
| C3066 | OB | OB+ | 26 | COe1c(cc(cc1)Cl)C(=O)NCCc1ccc(cc1)S(=O)(=O)[N-]C(=O)NC1CCCCC1                                                                  |
| C3067 | OB | OB+ | 26 | O1c2c(cccc2)OCC1C1=NCCN1                                                                                                       |
| C3068 | OB | OB- | 27 | O=C1N(C(=O)C([NH2+])C(CCc2cccc2)C(=O)OCC)C(CN1C)C(=O)[O-]                                                                      |
| C3069 | OB | OB+ | 26 | O1C2C(OCC2O)C(O[N+](=O)[O-])C1                                                                                                 |
| C3070 | OB | OB+ | 27 | C1C(C2C(O1)C(CO2)O[N+](=O)[O-])O[N+](=O)[O-]                                                                                   |
| C3071 | OB | OB+ | 26 | S1(=O)(=O)N(C)/C=C(\O)/Nc2noc(c2)C)/C(=O)c2c1cccc2                                                                             |
| C3072 | OB | OB- | 27 | [C@@]1(c2c(cccc2)Cl)(CC(=O)CCC1)[NH2+](C)                                                                                      |
| C3073 | OB | OB+ | 26 | CC(=O)N1CCN(CC1)c1ccc(cc1)OCC1COC(Cn2ccnc2)(O1)c1ccc(cc1)Cl                                                                    |
| C3074 | OB | OB+ | 26 | S1CC(N(C1)C(=O)C(O)C(NC(=O)C)C(NC(=O)COe1nccc2c1cccc2)CSC)Cc1cccc1C(=O)NC(C)C                                                  |
| C3075 | OB | OB- | 26 | C[N+](C)C)CC(C(=O)[O-])O                                                                                                       |
| C3076 | OB | OB+ | 26 | S1c2c(cc(cc2)OC)N(c2c1cccc2)CC(C[NH+](C)C)C                                                                                    |
| C3077 | OB | OB+ | 27 | [C@@H]1([C@H](NC(=O)[C@@H]2[NH+](C[C@@H](C2)CCC)C)[C@@H](O)C)[C@@H]([C@H]([C@H](O1)SC)O)O                                      |
| C3078 | OB | OB+ | 26 | Clc1cc2c(cc1)Oe1c(ccc1)N=C2N1CC[NH+](CC1)C                                                                                     |
| C3079 | OB | OB- | 27 | FC(F)(CCCC)C1(OC2C(CC1)C(CCCCCC(=O)[O-])C(=O)C2)O                                                                              |
| C3080 | OB | OB- | 26 | O1Ce2c(cc3n(Cc4c3nc3c(cc5c(c3)OCCO5)c4C[NH+])3CCN(CC3)C)c2=O)C(CC)C1=O                                                         |

|       |    |     |          |                                                                                                                                                                       |
|-------|----|-----|----------|-----------------------------------------------------------------------------------------------------------------------------------------------------------------------|
| C3081 | OB | OB+ | 27       | CC1(C2CC3C(C(=O)C(=C(C3(C(=O)C2=C(c2c1cccc2O)O)O)C(=O)NC[NH2+])CCCC(C(=O)[O-])N)[NH+](C)C)O                                                                           |
| C3082 | OB | OB+ | 26       | [NH2+](C)C1(C2CC(CCC2)C1(C)C)C                                                                                                                                        |
| C3083 | OB | OB+ | 26       | O(C(=O)C)C1(CCC2C3C(CCC12C)C1(C(=CC(=O)CC1)C(=C3)C)C)C(=O)C                                                                                                           |
| C3084 | OB | OB- | 27       | OC1CCC2C3C(CCC12C)C1(C(CC(=O)CC1C)CC3)C                                                                                                                               |
| C3085 | OB | OB+ | 26       | OC1(CCC2C3C(CCC12C)C1(C(=CC(=O)CC1)CC3)C)C                                                                                                                            |
| C3086 | OB | OB+ | 26       | OC1C(O)C(O)C[NH+](CCO)C1CO                                                                                                                                            |
| C3087 | OB | OB- | 27       | O(C)c1c(ccc1OC)C[C@H]1[N@@+](CCc2c1cc(c2)OC)OC(CCCOC(=O)CC/C=C\CCC(=O)OCCC[N@+](CCc2c(ccc(c2)OC)OC)[C@@H]1Cc1cc(c(c1)OC)OC)OC)C)OC                                    |
| C3088 | OB | OB+ | 26       | S(CC1=C(N2C(OC1)C(C2=O)(OC)NC(=O)C(C(=O)[O-])c1ccc(cc1)O)C(=O)[O-])c1[n+](nn[nH]1)C                                                                                   |
| C3089 | OB | OB+ | 27       | S1C2N(C(C(=O)[O-])C1(C)C)C(=O)C2NC(=O)c1c2c(ccc1OCC)cccc2                                                                                                             |
| C3090 | OB | OB+ | 26       | O(C(=O)C1(CCC=CC1[NH2+])C)c1cccc1)CC                                                                                                                                  |
| C3091 | OB | OB- | 27       | c12c(c[nH]e1cccc2)C[C@H]1C(=O)N[C@@H](C(=O)N[C@@H](C(=O)N[C@@H](C(=O)N[C@@H](C(=O)N[C@@H](C(=O)N[C@@H](C(=O)N1Cc1cccc1)NC(=O)[C@@H](Cc1cccc1)[NH3+])][C@@H](O)C)CCCCN |
| C3092 | OB | OB+ | 26       | O(C(CC)CC)C1C=C(CC([NH3+])C1NC(=O)C)C(=O)[O-]                                                                                                                         |
| C3093 | OB | OB+ | 27       | S1C2N(C(C(=O)[O-])C1(C)C)C(=O)C2NC(=O)c1c(noc1C)c1cccc1                                                                                                               |
| C3094 | OB | OB+ | 26       | OC1CC(=O)N(C1)CC(=O)N                                                                                                                                                 |
| C3095 | OB | OB- | 26       | C1C(C(C(C(O1)OC1COC(C(C1O)O)OC1COC(C(C1O)O)O)O)O)O                                                                                                                    |
| C3096 | OB | OB+ | 27       | [O-]C(=O)C1N(C2C(C1)CCCC2)C(=O)C([NH2+])C(CCC)C(=O)[O-])C                                                                                                             |
| C3097 | OB | OB+ | 27       | OC(C([NH3+])C)c1cccc1                                                                                                                                                 |
| C3098 | OB | OB- | 27       | ClC1CCC(CC1OC)/C=C(\C)/C1OC(=O)C2N(CCCC2)C(=O)C(=O)C2(OC(C(OC)CC2C)C(OC)CC(C/C(=C/C(CC)C(=O)CC(O)C1C)/C)C)O                                                           |
| C3099 | OB | OB+ | 26       | Clc1ccc(cc1)c1c(nc(nc1N)N)CC                                                                                                                                          |
| C3100 | OB | OB- | 26       | [n+]1(c2c(cc(cc2)N(C)C)ccc1/C=C\c1cc(n(c1C)c1cccc1)C)C                                                                                                                |
| C3101 | OB | OB+ | 27       | S(=O)(=O)(NC1CC2C([NH+](C1)CCC)Cc1c(c(ccc1)O)C2)N(CC)CC                                                                                                               |
| C3102 | OB | OB+ | 26       | O(C(=O)C([NH2+])C(C(=O)N1CCc2c(cccc2)C1C(=O)[O-])C)CCc1cccc1)CC                                                                                                       |
| C3103 | OB | OB+ | 27       | [O-]C(=O)C1N(C2C(C1)CCCC2)C(=O)C([NH2+])C(CCc1cccc1)C(=O)[O-])C                                                                                                       |
| C3104 | OB | OB+ | 26       | O=C(Nc1c(ccc1C)N)CCCC[NH2+])C(C)C                                                                                                                                     |
| C3105 | OB | OB+ | 27       | Oc1cc(ccc1)O)C(O)C[NH2+])CCCN1c2c(nc1)n(C)c(=O)n(C)c2=O                                                                                                               |
| C3106 | OB | OB- | 27       | O1c2c3c4c(c(c2C)O)C(=O)C(=C2NC5(N=C42)CC[NH+](CC5)CC(C)C)NC(=O)/C(=C/C=C(C)C)C(O)C(C)C(O)C(C)C(OC(=O)C)C(C)C(OC)/C=C\OC1(C)C3=O)/C                                    |
| C3107 | OB | OB+ | 27       | O1c2c3c4c(c(c2C)O)c(c(c4O)/C=N/N2CC[NH+](CC2)C2CCCC2)NC(=O)/C(=C/C=C\C(C)C)C(O)C(C)C(O)C(C)C(OC(=O)C)C(C)C(OC)/C=C\OC1(C)C3=O)/C)O                                    |
| C3108 | OB | OB+ | 26       | Oc1c(c(=O)c2c(ccc2)n1C)C(=O)N(C)c1cccc1                                                                                                                               |
| C3109 | OB | OB+ | 27       | O1C(CC)C(O)C(C)C(C)/C(=N\OCOCOC)/C(CC(O)C)C(OC2OC(CC([NH+](C)C)C2O)C)C(C)C(OC2OC(C)C(O)C(OC)(C2)C)C(C)C1=O)C                                                          |
| C3110 | OB | OB- | 26       | [NH+](C(Cc1cccc1)C)(CC#C)C                                                                                                                                            |
| C3111 | OB | OB+ | 26       | S(=O)(=O)(Nc1ccc(cc1)C(=O)NCC[NH+](CC)CC)C                                                                                                                            |
| C3112 | OB | OB- | 26       | s1cccc1CC[NH+]1CCC(N(C(=O)CC)c2cccc2)(CC1)COC                                                                                                                         |
| C3113 | OB | OB+ | 26       | S(=O)(CCC1C(=O)N(N(C1=O)c1cccc1)c1cccc1)c1cccc1                                                                                                                       |
| C3114 | OB | OB- | 26       | O(C)c1cc2c([nH]cc2/C=N\NC(=N)N)CCCCc1                                                                                                                                 |
| C3115 | OB | OB+ | 27       | O1C(CN(c2cc(ccc2)C)C1=O)CO                                                                                                                                            |
| C3116 | OB | OB+ | 27       | [C@@]12([C@@]3([C@@H](C[C@H]1OC(O2)(C)C)[C@H]1[C@])([C@H](C3)O)([C@@H]2C(=CC(=O)C=C2)CC1)F)C)C(=O)CO                                                                  |
| C3117 | OB | OB- | 26       | C1CC[N+]2(C1)C1CCC2CC(C1)OC(=O)C(c1cccc1)(c1cccc1)O                                                                                                                   |
| C3118 | OB | OB+ | 26       | n1c2c(nc1)cc1c(c2)C2CC1C[NH2+])C2                                                                                                                                     |
| C3119 | OB | OB+ | 26       | O1CC[NH2+])CC1COc1cccc1OCC                                                                                                                                            |
| C3120 | OB | OB- | 27       | O(C(=O)C)C1C2(C3[NH+](CCC43C(N(c3cc(c(cc43)C3)CC4CC(O)(CN(C4)CCc4c3[nH]c3c4cccc3)CC)C(=O)OC)OC)C)C1(O)C(=O)OC)CC=C2)CC                                                |
| C3121 | OB | OB+ | 27       | Ce1cn(c(=O)[nH]c1=O)C1CC(C(O1)CO)N=[N+]=[N-]                                                                                                                          |
| C3122 | OB | OB+ | 26       | Brc1ccc(cc1)/C(=C\C[NH+](C)C)/c1cccn1                                                                                                                                 |
| C3123 | OB | OB+ | 25,28    | Oc1c2cn[nH]c2nnc1                                                                                                                                                     |
| C3124 | OB | OB+ | 25       | c1ccc(cc1)C(c1cccc1)(C[C@@H]([NH+](C)C)C)[C@@H](OC(=O)C)CC                                                                                                            |
| C3125 | OB | OB+ | 25,28,29 | NC(=N)NC(=O)c1nc(c(nc1N)N)Cl                                                                                                                                          |
| C3126 | OB | OB+ | 25       | CC1(C)S[C@@H]2C(NC(=O)C([NH3+])c3ccc(cc3)O)C(=O)N2C1C(=O)[O-]                                                                                                         |

|       |    |     |          |                                                                                                                                                             |
|-------|----|-----|----------|-------------------------------------------------------------------------------------------------------------------------------------------------------------|
| C3127 | OB | OB- | 25,28    | [O-]C(=O)C[C@H](O)C[C@H](O)CCn1c(c(c1C(C)C)C(=O)Nc1cccc1)c1cccc1)c1ccc(cc1)F                                                                                |
| C3128 | OB | OB+ | 25       | OC1=C(C(=O)C(=O)c2cccc12)C1CCC(c2ccc(cc2)Cl)CC1                                                                                                             |
| C3129 | OB | OB+ | 25       | OCC(C(=O)OC1C[C@H]2[NH+](C)[C@H](CC2)C1)c1cccc1                                                                                                             |
| C3130 | OB | OB- | 25       | O[C@@]12O[C@@](NC(=O)[C@@H]3C=C4c5c6c([nH]c(c6C[C@H]4[NH+](C)C3)Br)ccc5)(C(=O)N1[C@H](C(=O)N1CCC[C@@H]21)CC(C)C(C)C                                         |
| C3131 | OB | OB+ | 25       | CCOc1nc2c(n1Cc1ccc(cc1)c1c(cccc1)c1nnn[nH]1)c(ccc2)C(=O)[O-]                                                                                                |
| C3132 | OB | OB+ | 25       | C[C@H](CS)C(=O)N1CCC[C@H]1C(=O)[O-]                                                                                                                         |
| C3133 | OB | OB+ | 25       | COc1c(cccc1)OCC[NH2+]CC(O)COc1c2c([nH]c3c2cccc3)ccc1                                                                                                        |
| C3134 | OB | OB+ | 25       | [O-]C(=O)C1=C(C=C)CS[C@H]2N1C(=O)[C@H]2NC(=O)/C(=N/OCC(=O)O)/c1csc(n1)N                                                                                     |
| C3135 | OB | OB+ | 25       | CC1=C(N2[C@H](SC1)[C@H](NC(=O)C([NH3+])c1cccc1)C2=O)C(=O)[O-]                                                                                               |
| C3136 | OB | OB+ | 25       | [O-]C(=O)C1=C(C)CS[C@H]2N1C(=O)[C@H]2NC(=O)C([NH3+])C1=CCC=CC1                                                                                              |
| C3137 | OB | OB+ | 25       | OC[C@@H](NC(=O)C(Cl)Cl)[C@H](O)c1ccc(cc1)[N+](=O)[O-]                                                                                                       |
| C3138 | OB | OB+ | 25       | CC[NH+](CC)CCCC(C)Nc1c2ccc(cc2ncc1)Cl                                                                                                                       |
| C3139 | OB | OB+ | 25       | C[NH+](C)CCC(c1ccc(cc1)Cl)c1cccn1                                                                                                                           |
| C3140 | OB | OB+ | 25       | NS(=O)(=O)c1c(ccc(c1)C1(O)NC(=O)c2cccc12)Cl                                                                                                                 |
| C3141 | OB | OB+ | 25,29    | CN/C(=N\CCSCc1c([nH]cn1)C)/NC#N                                                                                                                             |
| C3142 | OB | OB+ | 25       | C[NH+](C)CCCC1(OCc2cc(ccc12)C#N)c1ccc(cc1)F                                                                                                                 |
| C3143 | OB | OB+ | 25       | o[C@H]1C@H[OC2]C@H[C@H](O)c1c@H3O[C@H]3O[C@H](O)[C@@](OC)C3)[C@H](C(=O)O[C@H](CC)[C@](O)C)[C@H](O)[C@H](C(=O)[C@H](OC)C)O[C@H](OC[C@@H]1NH+)(C)C            |
| C3144 | OB | OB+ | 25       | [O-]C(=O)[C@H]1N2C(=O)C[C@H]2O/C1=C\CO                                                                                                                      |
| C3145 | OB | OB+ | 25       | O[C@H]1[C@H](O[C@H](C(NC(=O)[C@H]2[NH+](C)C[C@H](CCC)C2)C(Cl)C)[C@H](O)[C@@H]1O)SC [O-                                                                      |
| C3146 | OB | OB+ | 25       | ]C(=O)[C@@H]1N2C(=O)[C@@H](NC(=O)c3c(onc3c3cccc3Cl)C)[C@H]2SC1(C)C                                                                                          |
| C3147 | OB | OB+ | 25,31    | [C@@H]12C[C@@H](C)[C@](O)(C(=O)CO)[C@@]1(C)C[C@H](O)[C@@]1(F)[C@H]2CCC2=CC(=O)C=C[C@]12C                                                                    |
| C3148 | OB | OB+ | 25       | CC1=NS(=O)(=O)c2cc(ccc2N1)Cl                                                                                                                                |
| C3149 | OB | OB+ | 25       | [O-]C(=O)Cc1cccc1Nc1c(ccc1Cl)Cl                                                                                                                             |
| C3150 | OB | OB+ | 25       | [O-]C(=O)[C@@H]1N2C(=O)[C@@H](NC(=O)c3c(onc3c3c(ccc3Cl)Cl)C)[C@H]2SC1(C)C                                                                                   |
| C3151 | OB | OB+ | 25       | C1C[C@@H](O[C@@H]1CO)n1cnc2c1ncnc2O                                                                                                                         |
| C3152 | OB | OB+ | 25       | o[C@H]1c[C@H](O[C@H]2[C@@H](O)C1C@H[OC2]C@H[C@H](O)c1c@H3[C@@H](O)C1C@H[OC2]C@H[C@H](O)[C@@](OC)C7=CC(=O)OC7)CC[C@]165O)C4O[C@@H]3C[C@@H]2C[C@H](O)C[C@H]1O |
| C3153 | OB | OB- | 25       | [nH]1cc(c2cccc12)C(=O)OC1CC2[NH+] <sup>3</sup> CC(=O)C(C2)C[C@@H]3C1                                                                                        |
| C3154 | OB | OB+ | 25       | C[NH+](C)CC/C=C/1\c2c(cccc2)COc2c1cccc2                                                                                                                     |
| C3155 | OB | OB- | 25       | COc1cccc2c1C(=O)c1c(c3c(c1O)[C@H](C[C@](C3)(O)C(=O)CO)O[C@H]1C[C@H]([NH3+])[C@H](O)[C@H](C)O1)O)C2=O                                                        |
| C3156 | OB | OB+ | 25       | O/C(=C\1/C(=O)[C@@H]([NH+](C)C)[C@@H]2[C@@H](O)[C@H]3C(=C(O)c4c(cccc4O)[C@@H]3C)C(=O)[C@]2(O)C1=O)/N                                                        |
| C3157 | OB | OB+ | 25       | N(C(=O)[C@H]1CC[C@H]2[C@@H]3CC[C@H]4NC(=O)C=C[C@]4(C)[C@H]3CC[C@]12C)C(C)C                                                                                  |
| C3158 | OB | OB+ | 25,30,31 | NS(=O)(=O)c1cc(c(cc1Cl)NCc1ccc1)C(=O)[O-]                                                                                                                   |
| C3159 | OB | OB+ | 25       | OC1(CC[NH+](CCCC(=O)c2ccc(cc2)F)CC1)c1ccc(cc1)Cl                                                                                                            |
| C3160 | OB | OB+ | 25       | O[C@@H]1CO[C@@H]2[C@@H](O)[N+](=O)[O-]CO[C@H]12                                                                                                             |
| C3161 | OB | OB+ | 25       | c1nn(cn1)C[C@]1(OC[C@@H](O1)COc1ccc(cc1)N1CCN(c2ccc(cc2)n2cnn(c2=O)[C@@H](C)CC)CC1)c1c(cc(cc1)Cl)Cl                                                         |
| C3162 | OB | OB+ | 25       | OC[C@@H]1O[C@H](n2ccc(nc2=O)N)CS1                                                                                                                           |
| C3163 | OB | OB+ | 25       | Cc1c(ccnc1CS(=O)c1nc2c([nH]1)cccc2)OCC(F)(F)F [O-                                                                                                           |
| C3164 | OB | OB+ | 25,30    | ]C(=O)[C@@H]([NH3+])Cc1cc(c(cc1)O)O                                                                                                                         |
| C3165 | OB | OB+ | 25       | OCc1c(nc(n1Cc1ccc(cc1)c1cccc1c1n[n-]nn1)CCCC)Cl                                                                                                             |
| C3166 | OB | OB- | 25       | O[C@H]1CC(=O)O[C@H](CC[C@H]2[C@H](C=CC3=C[C@H](C)C[C@H](OC(=O)[C@@H](C)CC)[C@H]23)C)C1 [O-                                                                  |
| C3167 | OB | OB+ | 25       | ]C(=O)[C@@H]([NH3+])Cc1ccc(cc1)N(CCC)CC1                                                                                                                    |
| C3168 | OB | OB- | 25       | S=c1[nH]cnc2c1[nH]cn2                                                                                                                                       |
| C3169 | OB | OB+ | 25       | O/C(=C\1/C(=O)[C@@H]([NH+](C)C)[C@@H]2[C@H]3C(=C(O)c4c(ccc(c4C3)N(C)C)O)C(=O)[C@]2(O)C1=O)/N                                                                |
| C3170 | OB | OB+ | 25       | O[C@@H]1CC(=O)[C@H](CCCCC(=O)OC)[C@H]1/C=C/CC(O)(C)CCCC                                                                                                     |
| C3171 | OB | OB+ | 25       | [O-]C(=O)C1=C(CSc2nnnn2)CO[C@H]2N1C(=O)[C@@]2(OC)NC(=O)C(C(=O)O)c1ccc(cc1)O [O-                                                                             |
| C3172 | OB | OB+ | 25       | ]C(=O)c1cn(c2c(c(cc2c1=O)F)N1C[C@H]2[NH2+]CCC[C@H]2C1)OC)C1CC1                                                                                              |

|       |    |              |             |                                                                                                                                                              |
|-------|----|--------------|-------------|--------------------------------------------------------------------------------------------------------------------------------------------------------------|
| C3173 | OB | OB+          | 25,31       | CC(C)(C)[NH2+]CC(O)COc1c2c(ccc1)C[C@H]([C@H](C2)O)O                                                                                                          |
| C3174 | OB | OB+          | 25          | Oc1c2e3c(cc1)C[C@H]1[C@@]4(CCC(=O)[C@H](O2)[C@]34CC[NH+]1CC1CC1)O                                                                                            |
| C3175 | OB | OB+          | 25          | CNS(=O)(=O)CCc1cc2c([nH]cc2C2CC[NH+](C)CC2)cc1                                                                                                               |
| C3176 | OB | OB+          | 25          | Oc1cc2c(cc1)C[C@H]1[NH+](CC=C(C)C)CC[C@]2(C)[C@H]1C                                                                                                          |
| C3177 | OB | OB+          | 25          | CCCCC1C(=O)N(N(C1=O)c1ccccc1)c1ccccc1                                                                                                                        |
| C3178 | OB | OB+          | 25,31       | O=C1NC(=O)C(N1)(c1ccccc1)c1ccccc1                                                                                                                            |
| C3179 | OB | OB+          | 25          | O[C@H](c1c2cc(ccc2ncc1)OC)[C@H]1[NH+]2CCC(C1)[C@@H](C=C)C2                                                                                                   |
| C3180 | OB | OB+          | 25,28       | OC[C@H]1O[C@@H](n2nc(nc2)C(=O)N)[C@H](O)[C@@H]1O                                                                                                             |
| C3181 | OB | OB-          | 25          | CO[C@H]1C=C(O)[C@]2(C)Oe3c(c4c(c3C)O)C(=O)C=C3NC5(CC[NH+](CC(C)O)CC5)N=C43NC(=O)C=C/C[C@H](C)[C@H](O)[C@@H](C)[C@H](O)[C@@H](C)[C@H](OC(=O)C)[C@H]1C)/C/C2=O |
| C3182 | OB | OB-          | 25          | CC(C)(C)NC(=O)[C@H]1C[C@H]2CCCC[C@@H]2C[N@@H+]1C[C@H](O)[C@@H](Cc1ccccc1)NC(=O)[C@@H](CC(=O)N)NC(=O)c1nc2c(cccc2)cc1                                         |
| C3183 | OB | OB+          | 25          | OCC(C(=O)OC1C[C@@H]2[NH+](C)[C@@H](C1)[C@@H]1O[C@H]2)1c1ccccc1                                                                                               |
| C3184 | OB | OB+          | 25,28,29    | [nH]1c2c(n(nc2CC)C)c(=O)nc1c1c(ccc(c1)S(=O)(=O)N1CC[NH+](C)CC1)OCC                                                                                           |
| C3185 | OB | OB+          | 25          | Cc1cn([C@@H]2O[C@H](CO)C=C2)c(=O)[nH]c1=O                                                                                                                    |
| C3186 | OB | OB-          | 25,29,30,31 | [O-]C(=O)C1=C/C(=N/Nc2ccc(cc2)S(=O)(=O)Nc2ccccc2)/C=CC1=O                                                                                                    |
| C3187 | OB | OB+          | 25          | COC1CC(CCC1O)/C=C(\C)/C1OC(=O)C2CCCCN2C(=O)C(=O)C2(O)OC(C(CC2)OC)C(CC(C)C/C(=C/C(CC=C)C(=O)CC(O)C1C)/C)OC                                                    |
| C3188 | OB | OB+          | 25,28       | NS(=O)(=O)c1c(ccc(c1)C[C@H]([NH2+]CCOe1ccccc1OCC)C)OC                                                                                                        |
| C3189 | OB | OB+          | 25          | O/C(=C1/C(=O)[C@@H]([NH+](C)C)[C@@H]2C[C@H]3C(=C(O)c4c(cccc4O)C3(O)C)C(=O)[C@]2(O)C1=O)/N                                                                    |
| C3190 | OB | OB-          | 25          | CCCCC1cc(c2c(c1)OC(C1C2C=C(C)CC1)(C)C)O                                                                                                                      |
| C3191 | OB | OB+          | 25          | Cc1c(ccc1)C(=CCC[NH+]1CCC[C@H](C1)C(=O)[O-])c1c(ccs1)C                                                                                                       |
| C3192 | OB | OB+          | 25,28       | Oc1c(cc(cc1)C)[C@H](c1ccccc1)CC[NH+](C(C)C)C(C)C                                                                                                             |
| C3193 | OB | OB+          | 25          | NS(=O)(=O)OC[C@]12OC(O[C@H]1[C@@H]1OC(O[C@H]1CO2)(C)C)(C)C                                                                                                   |
| C3194 | OB | OB+          | 25,28       | Cc1nnc2n1c1c(cc(cc1)Cl)C(=NC2)c1ccccc1Cl                                                                                                                     |
| C3195 | OB | OB+          | 25          | [O-]C(=O)[C@@H](N(C(=O)CCCC)Cc1ccc(cc1)c1ccccc1c1n[nH]nn1)C(C)C                                                                                              |
| C3196 | OB | OB+          | 25          | CC(=O)CC(c1ccccc1)c1c(O)oc2ccccc2c1=O                                                                                                                        |
| C3197 | OB | OB-          | 25          | CC(=O)N[C@@H]1[C@H](NC(=N)N)C=C(OC1[C@H](O)[C@H](O)CO)C(=O)[O-]                                                                                              |
| C3198 | PS | Nonsubstrate | 172         | c1ccccc1CCc2ccccc2OCc2ccccc2OC)c1                                                                                                                            |
| C3199 | PS | Nonsubstrate | 172         | OC(=O)c1cc(C(=O)O)ccc1c1c2c(cc(c2)CCC(=O)O)O)oc2c1cc(c(=O)c2)CCC(=O)O                                                                                        |
| C3200 | PS | Nonsubstrate | 172         | O=C(O[C@H]1[C@H](Oe2c(C1)c(cc(c2)O)O)c1cc(c(c1)O)OC)O)c1cc(c(c1)O)OC)O                                                                                       |
| C3201 | PS | Nonsubstrate | 172         | O=c1c(cn(c(=O)[nH]1)C1C(C(C(O1)CO)O)O)F                                                                                                                      |
| C3202 | PS | Nonsubstrate | 172         | O=c1c2c(cc(c2oc(c1)c1ccccc1)C/C=C(/CCC=C(C)C)/C)O)O                                                                                                          |
| C3203 | PS | Nonsubstrate | 172         | OC[C@H]1Oe2c(O[C@@H]1c1ccc(c1)OC)O)cc(cc2)c1oc2c(c(cc(c2C/C=C(/CCC=C(C)C)/C)O)O)c(=O)c1O                                                                     |
| C3204 | PS | Nonsubstrate | 172         | OC[C@H]1Oe2c(O[C@@H]1c1ccc(c1)OC)O)cc(cc2)c1oc2c(c(cc(c2CC=C(C)C)O)O)c(=O)c1O                                                                                |
| C3205 | PS | Nonsubstrate | 172         | O=c1c2c(cc3n1Cc1cc4c(nc31)cccc4N)[C@@](C(=O)OC2)(O)CC                                                                                                        |
| C3206 | PS | Nonsubstrate | 172         | O=C(Nc1c(cccc1C(C)C)C(C)C)CN(CC(=O)O)CC(=O)O                                                                                                                 |
| C3207 | PS | Nonsubstrate | 172         | O=C(Oc1c(cccc1)C(=O)O)C                                                                                                                                      |
| C3208 | PS | Nonsubstrate | 172         | O=S(c1ccc2c(c1)nc([nH]2)NC(=O)OC)CCC                                                                                                                         |
| C3209 | PS | Nonsubstrate | 172         | O=C(ON=CC(SC)(C)C)NC                                                                                                                                         |
| C3210 | PS | Nonsubstrate | 172         | NC12CC3CC(CC(C1)C3)C2                                                                                                                                        |
| C3211 | PS | Nonsubstrate | 172         | O=C(Oc1ccc(c1)C)N(C)C)NC                                                                                                                                     |
| C3212 | PS | Nonsubstrate | 172         | O=c1cc(oc2c1c(cc(c2)O)O)c1ccc(cc1)O                                                                                                                          |
| C3213 | PS | Nonsubstrate | 172         | O=C(N)Cc1ccc(cc1)OCC(O)CNC(C)C                                                                                                                               |
| C3214 | PS | Nonsubstrate | 172         | OC1=C(C(=O)e2ccccc2C1=O)[C@@H]1CC[C@H](CC1)c1ccc(cc1)Cl                                                                                                      |
| C3215 | PS | Nonsubstrate | 172         | Clc1nc(nc(n1)NCC)NC(C)C                                                                                                                                      |
| C3216 | PS | Nonsubstrate | 172         | CC(=O)OCOC(=O)c1cc(C(=O)OCOC(=O)C)ccc1c1c2c(cc(c2)CCCC(=O)OCOC(=O)C)O)oc2c1cc(c(=O)c2)CCCC(=O)OCOC(=O)C                                                      |
| C3217 | PS | Nonsubstrate | 172         | c1ccc2cc3c4c5c(cccc5ccc4c2c1)cc3                                                                                                                             |
| C3218 | PS | Nonsubstrate | 172         | n1c(c2nc(c(nc2nc1N1C[C@@H](O[C@@H](C1)C)C)N1C[C@H](O[C@H](C1)C)C)c1ccccc1)N(CC(O)(C)C)CCO                                                                    |





|       |    |              |     |                                                                                                                                  |
|-------|----|--------------|-----|----------------------------------------------------------------------------------------------------------------------------------|
| C3265 | PS | Nonsubstrate | 172 | n1c2c(ccc1)c(ccc2)OCC(O)CN1CCN(CC1)C1c2ccccc2CCc2c1cccc2                                                                         |
| C3266 | PS | Nonsubstrate | 172 | O=C1OCC2C(c3c(C(C12)c1cc(c(c1)OC)OC)OC)cc1OCCc1c3)N(C)C                                                                          |
| C3267 | PS | Nonsubstrate | 172 | O=C1OCC2C(c3c(C(C12)c1cc(c(c1)OC)OC)OC)cc1OCCc1c3)NC                                                                             |
| C3268 | PS | Nonsubstrate | 172 | O=C(Oc1cc2c(cc1)cc(cc2)C(=N)N)c1ccc(cc1)N=C(N)N                                                                                  |
| C3269 | PS | Nonsubstrate | 172 | O=C1CC[C@]2([C@@]34CCN([C@@H]2C2c3c(O[C@@H]14)c(cc2)O)CC=C)O                                                                     |
| C3270 | PS | Nonsubstrate | 172 | Clc1cc(ccc1)N1CCN(CC1)CCc1c(=O)n(c(n1)CC)CCOc1cccc1                                                                              |
| C3271 | PS | Nonsubstrate | 172 | O=C(OCC)C1=C(NC(=C(C1c1cc(ccc1)[N+](=O)[O-])C(=O)OC)C)C                                                                          |
| C3272 | PS | Nonsubstrate | 172 | ClC1C(C(C(C1Cl)Cl)Cl)ClCl                                                                                                        |
| C3273 | PS | Nonsubstrate | 172 | O=NN(Cc1c2ccccc2ccc1)C(=O)C(C)NC(=O)C(C)C                                                                                        |
| C3274 | PS | Nonsubstrate | 172 | S(=O)(=O)(Nc1nc(cc(n1)C)C)c1ccc(cc1)NC(=O)COC(=O)c1c2[nH]c3ccccc3c(=O)c2ccc1                                                     |
| C3275 | PS | Nonsubstrate | 172 | S(=O)(=O)(Nc1nc(cc(n1)C)C)c1ccc(cc1)Nc1c2ccccc2nc2c(cccc12)C(=O)NNCCO                                                            |
| C3276 | PS | Nonsubstrate | 172 | O=C1c2c(c(ccc2[C@H](O1)C1c2c(CCN1C)cc1OCCc1c2OC)OC)OC                                                                            |
| C3277 | PS | Nonsubstrate | 172 | COc1ccc(cc1)c1cc(c2ccccc2n1)C(O)C1NCCCC1                                                                                         |
| C3278 | PS | Nonsubstrate | 172 | O=C(NCC(=O)NC1C(C(C(OC1C)NC1=NC=NC2=NC=NC12)O)O)CCCCCCCCCCCC(C)C                                                                 |
| C3279 | PS | Nonsubstrate | 172 | O=c1n(cccn1)[C@H]1[C@@H]([C@@H]([C@H](O1)CO)O)O                                                                                  |
| C3280 | PS | Nonsubstrate | 172 | O=c1n(c2c3cc4OCCc4cc3C(=O)c2c2cc(cc12)OC)OC)C                                                                                    |
| C3281 | PS | Nonsubstrate | 172 | O=C1C(C(N(C1C(=O)OCC)c1cccc1)C)c1cccc1C(=O)OCC [O-                                                                               |
| C3282 | PS | Nonsubstrate | 172 | ][N+](=O)c1c(cc(c1)OC)N][N+](=O)[O-] O=C(C1=C(OCCS1)C)Nc1ccc(c(c1)C(=O)OC(C)C)Cl                                                 |
| C3283 | PS | Nonsubstrate | 172 | O=S(=O)(Nc1cccc1OC)c1cc(C(C)C)ccc1OCCOc1ccc(C(C)C)cc1S(=O)(=O)Nc1cccc1OC                                                         |
| C3284 | PS | Nonsubstrate | 172 | O=C(c1c2ccccc2ccc1O)N/N=C(/CCC(=O)Nc1cc(C)ccc1C)\C(C)C(=O)c1ccc(cc1)O                                                            |
| C3285 | PS | Nonsubstrate | 172 | O=c1cc2c(nn1Cc1cccc1Cl)cccc2                                                                                                     |
| C3286 | PS | Nonsubstrate | 172 | CS(=O)(=O)c1c2c(nc3ccccc3n2)n2cc(nc2c1N)Cl                                                                                       |
| C3287 | PS | Nonsubstrate | 172 | O=C(c1ccc(cc1)OC)C(c1n(c2ccccc2c1C(=O)c1ccc(cc1)OC)C(=O)c1ccc(cc1)OC)C(=O)c1ccc(cc1)OC                                           |
| C3288 | PS | Nonsubstrate | 172 | Fe1ccc(cc1)[C@@](CN1CC[C@]2(CC1)N(CN(C2=O)CC(C)C)c1cccc1)(C1OCCO1)C                                                              |
| C3289 | PS | Nonsubstrate | 172 | S=c1c(c(ccn1C1C(C(O)C(C(O1)CO)O)C)c1cccc1)C#N                                                                                    |
| C3290 | PS | Nonsubstrate | 172 | CC(=O)c1c(c2occc2)c(c(=S)n(c1C)C1C(C(O)C(C(O1)CO)O)O)C#N                                                                         |
| C3291 | PS | Nonsubstrate | 172 | S=C1C(=Nc2ccccc2)N(C(=Nc2ccc[n+](c2)Cc2ccccc2)N1c1cccc1)c1cccc1                                                                  |
| C3292 | PS | Nonsubstrate | 172 | O=c1c2ccccc2nc(n1c1ccc(cc1)c1ccc(cc1)N1C(=O)CSC1c1cccc1NC)c1cccc1                                                                |
| C3293 | PS | Nonsubstrate | 172 | Clc1ccc(cc1)c1c2C(=O)CC(C)C)Cc2n(c(=S)c1C#N)[C@H]1[C@@H]([C@@H]([C@@H]([C@@H]([C@@H](O1)COC(=O)C)OC(=O)C)OC(=O)C)OC(=O)C)OC(=O)C |
| C3294 | PS | Nonsubstrate | 172 | N#CC1=C(N(C(=CC1c1cccc1)c1cccc1)C1C(C(C(C(O1)CO)O)O)O)S                                                                          |
| C3295 | PS | Nonsubstrate | 172 | N#CC1=C(N(C(=CC1c1cccc1)c1cccc1)C1C(C(C(C(O1)COC(=O)C)OC(=O)C)OC(=O)C)OC(=O)C)S                                                  |
| C3296 | PS | Nonsubstrate | 172 | CC(=O)OC1C(C(C(OC1n1c(=S)c(cc2c1CCCC2)C#N)COC(=O)C)OC(=O)C)OC(=O)C                                                               |
| C3297 | PS | Nonsubstrate | 172 | S=c1c(cc2c(n1C1C(C(O)C(C(O1)CO)O)O)CCCCC2)C#N                                                                                    |
| C3298 | PS | Nonsubstrate | 172 | S=c1c(cc2c(n1C1C(C(O)C(C(O1)CO)O)O)CCCC2)C#N                                                                                     |
| C3299 | PS | Nonsubstrate | 172 | OC(=O)c1n(c(nc1C(O)C)C)CCC)Cc1ccc(cc1)c1c(cccc1)c1nn[nH]n1                                                                       |
| C3300 | PS | Nonsubstrate | 172 | O(c1c(cccc1)OCC=C)CC(O)CNC(C)C                                                                                                   |
| C3301 | PS | Nonsubstrate | 172 | c1c(cccc1)CCN=C=S                                                                                                                |
| C3302 | PS | Nonsubstrate | 172 | n1c(cccc1)C(c1cccc1)CCN(C)C                                                                                                      |
| C3303 | PS | Nonsubstrate | 172 | OC1=C(N(S(=O)(=O)c2ccccc12)C)C(=O)Nc1cccc1                                                                                       |
| C3304 | PS | Nonsubstrate | 172 | O=C1[C@@H]2[C@@H](c3cc4OCCc4cc3[C@@H]([C@H]2CO1)O)c1cc(c(c1)OC)OC)OC                                                             |
| C3305 | PS | Nonsubstrate | 172 | OC(c1cccc1)(CCN1CCCC1)C1CCCCC1                                                                                                   |
| C3306 | PS | Nonsubstrate | 172 | O=C(c1c(cccc1)OCC(O)CNCCC)CCc1cccc1                                                                                              |
| C3307 | PS | Nonsubstrate | 172 | Clc1cc(c(cc1)C1(OC(CO1)CCC)Cn1cnc1)Cl                                                                                            |
| C3308 | PS | Nonsubstrate | 172 | Oc1cc2c(c[nH]c2cc1)CCCCN1CC=C(CC1)c1cccc1                                                                                        |
| C3309 | PS | Nonsubstrate | 172 | O=C(O)[C@@H](N)CSCC=C(CCC=C(C)CCC=C(C)C)C                                                                                        |
| C3310 | PS | Nonsubstrate | 172 |                                                                                                                                  |

|       |    |              |               |                                                                                                                   |
|-------|----|--------------|---------------|-------------------------------------------------------------------------------------------------------------------|
| C3311 | PS | Nonsubstrate | 172           | OC[C@H](c1cccc1)C(=O)O[C@H]1CC2N(C(C1)[C@H]1O[C@@H]21)C                                                           |
| C3312 | PS | Nonsubstrate | 172           | O=C(O[C@@H]1[C@H]2C(=C[C@H](C)C1)C=C[C@@H]([C@@H]2CC[C@H]1OC(=O)C[C@H](O)C1)C)C(C)CC                              |
| C3313 | PS | Nonsubstrate | 172           | O=C(N(c1cccc1)C1(CCN(CC1)CCc1cccc1)COC)CC                                                                         |
| C3314 | PS | Nonsubstrate | 172           | O=S(=O)(Nc1cccc1)c1ccc(cc1)N=Nc1ccc(c(e1)C(=O)O)O                                                                 |
| C3315 | PS | Nonsubstrate | 172           | O=S(=O)(NC)Cc1ccc2c(e1)e(e[nH]2)CCN(C)C                                                                           |
| C3316 | PS | Nonsubstrate | 172           | O=S(=O)(O)CCNC(=O)CC[C@@H](C)[C@@H]1[C@@]2([C@H](C[C@H]3[C@H]([C@@H]2CC1)[C@@H](C[C@H]1[C@]3(CC[C@H](C1)O)C)O)O)C |
| C3317 | PS | Nonsubstrate | 172           | O(c1e2e3c(cc1OC)CCN([C@H]3Cc1cc(Oc3ccc(C[C@@H]4N(CCc5c4cc(O2)c(e5)OC)C)cc3)c(cc1)OC)C)C                           |
| C3318 | PS | Nonsubstrate | 172           | ClC(Cl)(Cl)C(N1CCN(CC1)C(NC=O)C(Cl)(Cl)Cl)NC=O                                                                    |
| C3319 | PS | Nonsubstrate | 172           | c1ccc2c(e1)N(c1c(CC2)cccc1)CC(C)CN(C)C                                                                            |
| C3320 | PS | Nonsubstrate | 172           | S(=O)(=O)(O)c1cc2cc(c(c2c(e1)N)O)N=Nc1c(cc(cc1)c1cc(c(cc1)N=Nc1c(c2c(cc2cc1S(=O)(=O)O)S(=O)(=O)N)O)C)S(=O)(=O)O   |
| C3321 | PS | Nonsubstrate | 172           | O=C(O)[C@@H](N(C(=O)CCCC)Cc1ccc(cc1)c1c(ccc1)c1nn[nH]n1)C(C)C                                                     |
| C3322 | PS | Nonsubstrate | 172           | COe1c(ccc(e1)CCN(C)CCCC(C)C)(C#N)c1cc(c(cc1)OC)OC                                                                 |
| C3323 | PS | Nonsubstrate | 172           | O=C1N(C(=O)C(O1)(C=C)C)c1cc(cc1)ClCl                                                                              |
| C3324 | PS | Nonsubstrate | 172           | BrC1ccc(cc1)/C(=C)CN(C)C/c1cccc1                                                                                  |
| C3325 | PS | Nonsubstrate | 171           | COC1C(O)C2CN3CCc4c([nH]e5e4ccc(OC)e5)C3CC2C1C(=O)O                                                                |
| C3326 | PS | Nonsubstrate | 171           | COe1ccc(Cc2c(c3c([nH]n(e3=O)c3cccc3)c3cccc3)c(=O)[nH]nc2c2ccc(C)cc2)cc1                                           |
| C3327 | PS | Nonsubstrate | 163           | COe1cc(cc(OC)c1OC)C1C2C(COC2=O)C(OC2OC3COC(OC3C(O)C2O)c2cccc2)c2cc3c(OCO3)cc12                                    |
| C3328 | PS | Nonsubstrate | 157           | CSCCC(NC(=O)C(CC(C)C)NC(=O)C(CC(C)C)NC(=O)C)C=O                                                                   |
| C3329 | PS | Nonsubstrate | 157           | COC(=O)C(C)NC(=O)C(C)NC(=O)C(C)NC(=O)C                                                                            |
| C3330 | PS | Nonsubstrate | 149           | OC(=O)Cc1c(O)ccc(e1)/N=N\c1ccc(cc1)S(=O)(=O)Nc1cccc1                                                              |
| C3331 | PS | Nonsubstrate | 149           | Oe1ccc(cc1)/N=N\c1ccc(cc1)S(=O)(=O)Nc1cccc1                                                                       |
| C3332 | PS | Nonsubstrate | 96,41         | COe1ccc(Cc2c(C3C(=O)N(N=C3c3cccc3)c3cccc3)c(=O)[nH]nc2c2ccc(C)cc2)cc1                                             |
| C3333 | PS | Nonsubstrate | 75            | COe1cccc2c1C(=O)c1c(c(O)c3CC(O)(CC(OC4CC(N)C(I)C(C)O4)c3e1O)C(=O)CO)C2=O                                          |
| C3334 | PS | Nonsubstrate | 75            | CC1OC(CC(N)C1O)OC1CC(O)(Cc2c(O)c3c(cc12)C(=O)e1cccc1C3=O)C(=O)C                                                   |
| C3335 | PS | Nonsubstrate | 53            | CCCCC(O)CC(O)CC(=O)CCCC(=O)CC(O)CC(=O)CCCCC(O)CC(O)CC(=O)CCCC(=O)CC(O)CC(=O)CCCC(=O)C                             |
| C3336 | PS | Nonsubstrate | 41            | COC(=O)C(=C)C                                                                                                     |
| C3337 | PS | Nonsubstrate | 132           | NCCC(Oc1ccc(cc1)C(F)(F)F)c1cccc1                                                                                  |
| C3338 | PS | Nonsubstrate | 74            | Nc1nc(S)c2nc[nH]c2n1                                                                                              |
| C3339 | PS | Nonsubstrate | 133,68,93,39  | CCOC(=O)C1(CCN(C)CC1)c1cccc1                                                                                      |
| C3340 | PS | Nonsubstrate | 53            | CN1CCN(CC1)c1c(F)cc2c(=O)c(cn(CCF)c2c1F)C(=O)O                                                                    |
| C3341 | PS | Nonsubstrate | 68            | Cc1cn(C2OC(CO)C=C2)c(=O)[nH]c1=O                                                                                  |
| C3342 | PS | Nonsubstrate | 76            | CCCCC(C)C(OC(=O)C)CC(C)C(=O)C(=O)C(C)CC(O)CCCC(O)CC(O)C(C)N)OC(=O)CC(CC(=O)O)C(=O)O                               |
| C3343 | PS | Nonsubstrate | 157           | CCCCC(C)C(OC(=O)C)CC(C)C(=O)C(=O)C(C)CC(O)CCCC(O)CC(O)CC(=O)CCCCC(O)CC(O)CC(=O)CCCC(=O)CC(O)CC(=O)CCCC(=O)C       |
| C3344 | PS | Nonsubstrate | 125           | CC(C)(C#N)c1cc(cc(Cn2cnc2)c1)C(C)C#N                                                                              |
| C3345 | PS | Nonsubstrate | 106           | NC(=O)c1cc[n+](CC2=C(N3C(SC2)C(NC(=O)C(c2cccc2)S(=O)(=O)O)C3=O)C(=O)[O-])cc1                                      |
| C3346 | PS | Nonsubstrate | 71,53,71,96,4 | OCC(=O)C1CCC2C3CCC4=CC(=O)CCC4(C)C3CCC12C                                                                         |
| C3347 | PS | Nonsubstrate | 74            | CN1CCC(C(O)C1)c1c(O)cc(O)c2c1oc(cc2=O)c1cccc1Cl                                                                   |
| C3348 | PS | Nonsubstrate | 168,68,130    | Cc1ccc(cc1)/C(=C)CN1CCCC1/c1cccc1                                                                                 |
| C3349 | PS | Nonsubstrate | 44            | COe1ccc(cc1)c1coc2cc(O)cc(O)c2c1=O                                                                                |
| C3350 | PS | Nonsubstrate | 53,96         | COC(=O)Cl                                                                                                         |
| C3351 | PS | Nonsubstrate | 114,149       | Nc1cc(C(=O)O)c(O)cc1                                                                                              |
| C3352 | PS | Nonsubstrate | 126           | NC(=N)NCc1cccc1)c1                                                                                                |
| C3353 | PS | Nonsubstrate | 170,53,96     | Oe1c2OC3C(=O)CCC4(O)C5N(CC6CC6)CCC34c2c(cc1)C5                                                                    |
| C3354 | PS | Nonsubstrate | 121           | CC(O)C1C2C(C)C(=C(N2C1=O)C(=O)O)SC1CNC(C1)C(=O)Nc1ccc(cc1)C(=O)[O-]                                               |
| C3355 | PS | Nonsubstrate | 125           | NC1C(=O)NOC1                                                                                                      |
| C3356 | PS | Nonsubstrate | 155           | OC(CNCc1cccc1)COe1cccc1C(=O)CCc1cccc1                                                                             |





|       |    |           |     |                                                                                                                                            |
|-------|----|-----------|-----|--------------------------------------------------------------------------------------------------------------------------------------------|
| C3449 | PS | Substrate | 172 | Clc1ccc(cc1)[C@H]1CN2CCN=C2c2c1cccc2                                                                                                       |
| C3450 | PS | Substrate | 172 | O=C(c1cn(c2cccc12)C)[C@@H]1CCc2[nH]cnc2C1                                                                                                  |
| C3451 | PS | Substrate | 172 | CC(C)c1scc(n1)CN(C)C(=O)N[C@@H](C(C)C)C(=O)N[C@@H](Cc1cccc1)C[C@@H](O)[C@@H](Cc1cccc1)NC(=O)OCc1scnc1                                      |
| C3452 | PS | Substrate | 172 | O=C(OC)[C@@H](N)CSCC=C(CCC=C(C)CCC=C(C)C)C                                                                                                 |
| C3453 | PS | Substrate | 172 | Fe1ccc(cc1)C(c1ccc(cc1)F)CNC1CCN(CC1)c1nc(nc(n1)NCC=C)NCC=C                                                                                |
| C3454 | PS | Substrate | 172 | O=C(O[C@H]1C[C@H](C=C2[C@H]1[C@H]([C@H](C=C2)C)CC[C@H](C[C@H](CC(=O)O)O)O)C(C)C(C)C                                                        |
| C3455 | PS | Substrate | 172 | O[C@H](CCCCCCCCCCCC)[C@@H](N)CO                                                                                                            |
| C3456 | PS | Substrate | 172 | Fe1ccc(cc1)C(=O)CCCN1CCC2(CC1)N(CNC2=O)c1cccc1                                                                                             |
| C3457 | PS | Substrate | 172 | O=C(OC1CC2CN3CCc4c(C3CC2C(C1OC)C(=O)OC)[nH]c1cc(OC)ccc41)C=Cc1cc(c(c1)OC)OC)OC                                                             |
| C3458 | PS | Substrate | 172 | O(C)c1ccc2nc3cccc3c(NC(C)CCN(CC)CC)c2c1                                                                                                    |
| C3459 | PS | Substrate | 172 | S1C2N(C=C(C1)CS1n(nnn1)C)C(=O)O)C(=O)C2NC(=O)C1S/C(=C\C(=O)N)/C(=O)O)/S1                                                                   |
| C3460 | PS | Substrate | 172 | O=C1C2C(CO1)C(c1cc3OCOe3cc1C2c1cc(c(c1)OC)OC)OC)NC(=O)C                                                                                    |
| C3461 | PS | Substrate | 172 | Fe1ccc(cc1)Cn1c(nc2cccc12)NC1CCN(CC1)CCc1ccc(cc1)OC                                                                                        |
| C3462 | PS | Substrate | 172 | C1CCCC1=CCCN1CCc2c(C1)cc(OC)c(OC)c2                                                                                                        |
| C3463 | PS | Substrate | 172 | c12cccc(OC)c1CCCC2=CCCN1CCCC1                                                                                                              |
| C3464 | PS | Substrate | 172 | c12ccc(OC)cc1CCC=C2CCCN1CCc2c(C1)cc(OC)c(OC)c2                                                                                             |
| C3465 | PS | Substrate | 172 | O=C(O)C[C@H](O)C[C@H](O)CCn1c(c(c1C(C)C)C(=O)Nc1cccc1)c1cccc1)c1ccc(cc1)F                                                                  |
| C3466 | PS | Substrate | 172 | c12cccc(OC)c1CCCC2CCCN1CCc2c(C1)cc(OC)c(OC)c2                                                                                              |
| C3467 | PS | Substrate | 172 | c12cc(OC)c(OC)cc1CCCC2CCCN1CCc2c(C1)cc(OC)c(OC)c2                                                                                          |
| C3468 | PS | Substrate | 172 | c1c(ccc1)[P+](c1cccc1)(c1cccc1)c1cccc1                                                                                                     |
| C3469 | PS | Substrate | 172 | O[C@H](COc1c(nsn1)N1CCOCC1)CNC(C)C                                                                                                         |
| C3470 | PS | Substrate | 172 | Oc1c(c2cc3Cn4c(=O)c5c(cc4c3nc2cc1)C(C(=O)OC5)(O)CC)CN(C)C                                                                                  |
| C3471 | PS | Substrate | 172 | Clc1ccc2c(c1)[C@@H]1CN(C[C@H]1c1c(O2)cccc1)C                                                                                               |
| C3472 | PS | Substrate | 172 | C[N+](CCCC)(CCCC)CCCC                                                                                                                      |
| C3473 | PS | Substrate | 172 | FC(F)Fc1ccc2Sc3c(N(c2c1)CCCN1CCN(CC1)C)cccc3                                                                                               |
| C3474 | PS | Substrate | 172 | N[C@@H](Cc1ccc(cc1)O)C(=O)N[C@H](C)C(=O)NCC(=O)N(C)[C@@H](Cc1cccc1)C(=O)NCCO                                                               |
| C3475 | PS | Substrate | 172 | CC(=O)OC1C2(C=CCN3CCC4(c5cc(c(cc5N(C4C1(O)C(=O)OC)C)OC)C1(c4c(CCN5CC(C1)CC(C5)(O)CC)c1cccc1[nH]4)C(=O)OC)C23)CC                            |
| C3476 | PS | Substrate | 172 | O=C(c1ccc(cc1)N=[N+]=[N-])NCC[N+](CC)(CC)C                                                                                                 |
| C3477 | PS | Substrate | 172 | O=C(OC)[C@]1(C[C@H]2[C@](CN(CC3c1[nH]c1cccc31)C2)(O)CC)c1cc2c(cc1OC)N([C@@H]1[C@@]32[C@H]2N(CC=C[C@@]2([C@H]([C@@]1(O)C(=O)N)O)CC)CC3)C    |
| C3478 | PS | Substrate | 172 | O=C(OC)[C@]1(C[C@H]2C=C(CN(CC3c4cccc4[nH]c13)C2)CC)c1cc2c(cc1OC)N([C@@H]1[C@@]32[C@H]2N(CC=C[C@@]2([C@H]([C@@]1(O)C(=O)OC)OC(=O)C)CC)CC3)C |
| C3479 | PS | Substrate | 172 | O(CC(C)C)CC(N1CCCC1)CN(c1cccc1)Cc1cccc1                                                                                                    |
| C3480 | PS | Substrate | 172 | O1COe2c1cc1c(c2)CC[n+]2cc3c(c(ccc3cc12)OC)OC                                                                                               |
| C3481 | PS | Substrate | 172 | O=C(Nc1ccc(c1)C(F)(F)F)C#N)C(O)(C)CS(=O)(=O)c1ccc(cc1)F                                                                                    |
| C3482 | PS | Substrate | 172 | N#C/N=C\N[C@H]1CC[C@@H](CC1)C)/NS(=O)(=O)c1ccc(cc1)CCNC(=O)c1c(ccc(c1)Cl)OC                                                                |
| C3483 | PS | Substrate | 172 | O=C1N(CCN1)CCN1CCC(CC1)c1c2c(nc1)c1ccc(cc1)F)ccc(c2)c1nnn(n1)C                                                                             |
| C3484 | PS | Substrate | 172 | CC(C)C)c1oc(nc1)CSc1sc(nc1)NC(=O)C1CCNCC1                                                                                                  |
| C3485 | PS | Substrate | 172 | N#Cc1c(ccc1)OCC(O)CNC(C)C                                                                                                                  |
| C3486 | PS | Substrate | 172 | Cc1ccc(/C(=C/CN2CCCC2)/c2nc(/C=C\C(=O)N3CCCC3)ccc2)cc1                                                                                     |
| C3487 | PS | Substrate | 172 | Cc1ccc(/C(=C/CN2CCCC2)/c2nc(/C=C\C(=O)N3CCOCC3)ccc2)cc1                                                                                    |
| C3488 | PS | Substrate | 172 | O=C(O[C@H](COP(=O)(O)OC[C@H](N)C(=O)O)COC(=O)CCCCNc1c2nonc2c(cc1)[N+](=O)[O-])CCCCCCCCCCCC                                                 |
| C3489 | PS | Substrate | 172 | FC(F)(c1ccc(ncc1)N1CCN(CC1)CCCC1CCCC1=O)F                                                                                                  |
| C3490 | PS | Substrate | 172 | CC(=O)OCOC(=O)CN(CC(=O)OCOC(=O)C)Cc1c(cc2c(c1)C1(c3cc(c(cc3O2)OC(=O)C)CN(CC(=O)OCOC(=O)C)CC(=O)OCOC(=O)C)c2cccc2C(=O)O1)OC(=O)C            |
| C3491 | PS | Substrate | 172 | O=C(N(CC)CC)Nc1cc(c(cc1)OCC(O)CNC(C)C)C(=O)C                                                                                               |
| C3492 | PS | Substrate | 172 | O1c2c3[C@H](Cc4ccc(Oc5c(ccc[C[C@@H]6c7c(cc(c1c7)OC)CCN6C)c5)OC)cc4)N(Cc3cc1OCOe21)C                                                        |
| C3493 | PS | Substrate | 172 | O=C(O)C[C@H](O)C[C@H](O)C=C/c1c(c(nc1C(C)C)C(C)C)COC)c1ccc(cc1)F                                                                           |
| C3494 | PS | Substrate | 172 | COCOc1cccc2OCC3=C(C)CC[C@]4(OC(=O)O[C@H]4c12)C3(C)C                                                                                        |





|       |    |           |                |                                                                                                                                                                                |
|-------|----|-----------|----------------|--------------------------------------------------------------------------------------------------------------------------------------------------------------------------------|
| C3587 | PS | Substrate | 110155         | CC(=O)c1cccc1OCC(O)CN1CCN(CC1)c1ccc(F)cc1                                                                                                                                      |
| C3588 | PS | Substrate | 141            | COC(CCc1cccc1)c1cccc1OCC(O)CN(C(C)C)C(C)C                                                                                                                                      |
| C3589 | PS | Substrate | 141            | OC(COe1cccc(c1)C(=O)CCe1cccc1)CN1CCN(CC1)c1ccc(F)cc1                                                                                                                           |
| C3590 | PS | Substrate | 141            | CC(C)N(CC(O)COe1ccc(cc1)C(=O)CCe1cccc1)C(C)C                                                                                                                                   |
| C3591 | PS | Substrate | 145,95         | CCC(N1CCCC1=O)C(=O)N                                                                                                                                                           |
| C3592 | PS | Substrate | 71             | C12CCC(=O)C1(C)CCC1C2CC=C2CC(O)CCC12C                                                                                                                                          |
| C3593 | PS | Substrate | 109            | O/C(=C/1\C(=O)C(N(C)C)C2C(O)C3C(=O)c4c(ccc40)C3(O)C)C(=O)C2(O)C1=O)/N                                                                                                          |
| C3594 | PS | Substrate | 171            | CCC1(CCC(O1)C1(C)CCC2(CC(O)C(C)C(O2)C(C)C(OC)C(C)C(=O)O)1)C1OC(CC1C)C1OC(O)(CO)C(C)CC1C                                                                                        |
| C3595 | PS | Substrate | 145,89         | C12CC(O)C(O)(C(=O)CO)C1(C)CC(O)C1(F)C2CCC2=CC(=O)C=CC12C                                                                                                                       |
| C3596 | PS | Substrate | 93             | CCCN1CCC(CC1)(C(=O)OCC)c1cccc1                                                                                                                                                 |
| C3597 | PS | Substrate | 141            | CC(=O)c1cccc1OCC(O)CN1CCCC1                                                                                                                                                    |
| C3598 | PS | Substrate | 155            | CCCNCC(O)c1c(Cc2ccccc2)c2ccccc2o1                                                                                                                                              |
| C3599 | PS | Substrate | 110155         | OC(COe1cccc1C(=O)CCe1cccc1)CN1CCOCC1                                                                                                                                           |
| C3600 | PS | Substrate | 127            | C1CCN(N=O)C(=O)NC1CCCC1                                                                                                                                                        |
| C3601 | PS | Substrate | 110155         | OC(COe1cccc1C(=O)CCe1cccc1)CN1CCCC1                                                                                                                                            |
| C3602 | PS | Substrate | 171            | O=C(NC(CCc1cccc1)/C=C\S(=O)(=O)c1cccc1)C(Cc1cccc1)NC(=O)N1CCOCC1                                                                                                               |
| C3603 | PS | Substrate | ,163,171,49,53 | OC1CC(=O)OC(/C(=C/c2esc(n2)C)/C)CC2OC2CCCC(C)C(O)C(C(=O)C1(C)C)C                                                                                                               |
| C3604 | PS | Substrate | 0,52,69,89,96, | CN/C(=N/CCSc1c(C)[nH]cn1)/NC#N                                                                                                                                                 |
| C3605 | PS | Substrate | 80             | COc1c(OC)c(OC)c2c(CC(C)(O)C(C)Cc3c2c(OC)c2OCOe2c3)c1                                                                                                                           |
| C3606 | PS | Substrate | 9,52,53,54,57, | COC1CC(CCC1O)/C=C(\C)/C1OC(=O)C2CCCCN2C(=O)C(=O)C2(O)OC(C(CC2C)OC)C(CC(C)C/C(=C/C(CC=C)C(=O)CC(O)C1C)/C)OC                                                                     |
| C3607 | PS | Substrate | 2,53,61,69,86, | COe1cc(cc(OC)c1O)C1C2C(COC2=O)C(OC2OC3COC(OC3C(O)C2O)c2cccs2)c2c1cc1OCOe1c2                                                                                                    |
| C3608 | PS | Substrate | 140,49,61,74   | CC(Cc1cccc1)NCCC(c1cccc1)c1cccc1                                                                                                                                               |
| C3609 | PS | Substrate | 68             | CC(C)CC(NC(=O)C(Cc1cccc1)NC(=O)CNC(=O)C(C)NC(=O)C(N)Cc1ccc(O)cc1)C(=O)O                                                                                                        |
| C3610 | PS | Substrate | 141            | O[C@@@H](COe1cccc1C(=O)CCe1cccc1)CN1CC[C@@](O)(CC1)c1cccc1                                                                                                                     |
| C3611 | PS | Substrate | 71,49,52,53,5  | CCCCc1oc2ccccc2c1C(=O)c1cc(I)c(OCCN(CC)CC)c(I)c1                                                                                                                               |
| C3612 | PS | Substrate | 141            | OC(COe1cccc1C(O)CCe1cccc1)CN1CCCC1                                                                                                                                             |
| C3613 | PS | Substrate | 127            | CN(C)CCOe1cc2c(c3ccccc3C2=O)c2c1cccc2                                                                                                                                          |
| C3614 | PS | Substrate | 171            | COC1/C=C\OC2(C)Oe3c(C)c(O)c4c(O)c(NC(=O)/C=C\C=C\C(C)C(O)C(C)C(O)C(C)C(OC(=O)C)C1C)/C)c/C=N/N1CCN(C)CC1)c(O)c4c3C2=O                                                           |
| C3615 | PS | Substrate | 0,163,49,53,96 | CCOC(=O)Oe1c(OC)cc(cc1OC)C(=O)OC1CC2CN3CCc4c([nH]c5e4ccc(OC)c5)C3CC2C(C1OC)C(=O)OC                                                                                             |
| C3616 | PS | Substrate | 100            | N(C(=O)N(CC)CC)C1CN(C)C2Cc3c[nH]c4cccc(c34)C2C1                                                                                                                                |
| C3617 | PS | Substrate | 99             | COe1ccc2CCCC(CCCN3CCc4c(C3)cc(OC)c(OC)c4)c2c1                                                                                                                                  |
| C3618 | PS | Substrate | 135,140,49,52  | OCCOe1ccc(cc1)C(C)(C)CC(C)(C)C                                                                                                                                                 |
| C3619 | PS | Substrate | 68             | CCC1CN2CCc3cc(OC)c(OC)cc3C2CC1CC1NCCc2cc(O)c(OC)cc12                                                                                                                           |
| C3620 | PS | Substrate | 145,68,89      | OC(CC(NC(=O)C(N1C(=O)NCCCC1)C(C)C)Cc1cccc1)C(NC(=O)COe1c(ccc1C)C)Cc1cccc1                                                                                                      |
| C3621 | PS | Substrate | 100            | CC1CC2C3CCC4=CC(=O)C=CC4(C)C3C(=O)CC2(C)C1(O)C(=O)CO                                                                                                                           |
| C3622 | PS | Substrate | 52             | CN(C)CCC=C1c2c(CCc3c1cccc3)cccc2                                                                                                                                               |
| C3623 | PS | Substrate | 171            | CCC1(O)CC2CN(C1)CCc1c([nH]c3ccccc13)C(C2)(C(=O)OC)c1c(OC)cc2N(C=O)C3C4(CCN5CC=CC(CC)(C45)C(OC(=O)C)C3(O)C(=O)OC)c2c1                                                           |
| C3624 | PS | Substrate | 51,68          | CCCOe1c(cc(en1)S(=O)(=O)N1CCN(CC)CC1)c1nc2c(CC)n(Cc3cccn3)nc2c(=O)[nH]1                                                                                                        |
| C3625 | PS | Substrate | 74             | Fe1c(Cc2n[nH]c(=O)cc2)ccc(Cl)c1Oe1cccc1                                                                                                                                        |
| C3626 | PS | Substrate | 55             | COC(=O)C12OCC34C1C(OC(=O)/C=C(\C)/C(C)C)C(=O)OC3CC1C(=C(O)C(=O)CC1(C)C4C(O)C2O)C                                                                                               |
| C3627 | PS | Substrate | 68             | NS(=O)(=O)N1CCN(CC1)C1CN(CCC2(CCC(=O)N(CC3CC3)C2)c2cc(Cl)c(Cl)cc2)C1                                                                                                           |
| C3628 | PS | Substrate | 8,61,69,103,11 | ccc1nc(=O)c(C(O)c(C)C/C=C/C)N(C)C(=O)c(C(C)C)N(C)C(=O)c(C(C)C)N(C)C(=O)c(C)N(C)C(=O)c(C)N(C)C(=O)c(C(C)C)N(C)C(=O)c(NC(=O)C)C(C)C(=O)c(NC(=O)C)C(C)C(=O)CN(C)C1=O)C(C)C        |
| C3629 | PS | Substrate | 122            | Ce1nc(Nc2nce(s2)C(=O)Ne2c(C)cccc2Cl)cc(n1)N1CCN(CCO)CC1                                                                                                                        |
| C3630 | PS | Substrate | 50             | cc(C)[C@@H](NC(=O)[C@@H](CCCN=C(N)N)NC(=O)[C@@H](N)CC(=O)N)C(=O)N[C@@H](Cc1ccc(O)cc1)C(=O)N[C@@H](C(C)C)C(=O)N[C@@H](Cc1cnc[nH]1)C(=O)N1CCC[C@@H]1C(=O)N[C@@H](Cc1cccc1)C(=O)O |
| C3631 | PS | Substrate | 4,145,146,69,1 | C12CCC3(CCC(=O)O3)C1(C)CCC1C2C(CC2=CC(=O)CCC12C)SC(=O)C                                                                                                                        |
| C3632 | PS | Substrate | 55             | CN(C(=O)C)c1ccc(Nc2cc(C)nc3c2c2c([nH]cn2)cc3)cc1                                                                                                                               |



|       |    |              |                |                                                                                                                                                         |
|-------|----|--------------|----------------|---------------------------------------------------------------------------------------------------------------------------------------------------------|
| C3633 | PS | Substrate    | 67,99          | <chem>COc1cc2c(CN(CC/C=C\3/CCCc4c3cccc4OC)CC2)cc1OC</chem>                                                                                              |
| C3634 | PS | Substrate    | 9,53,61,69,86, | <chem>CCC12C=CCN3CCC4(C13)C(N(C)c1c4ccc(OC)c1)C(O)(C2OC(=O)C)C(=O)OC</chem>                                                                             |
| C3635 | PS | Substrate    | 69             | <chem>[O-][N+](=O)c1ccc(C[P+](c2ccccc2)(c2ccccc2)c2ccccc2)cc1</chem>                                                                                    |
| C3636 | PS | Substrate    | 145,69,100,128 | <chem>CN1CCCC(CC1)n1nc(Cc2ccc(Cl)cc2)c2ccccc2e1=O</chem>                                                                                                |
| C3637 | PS | Substrate    | 52             | <chem>CCN1CCCC1CNC(=O)c1cc(c(N)cc1OC)S(=O)(=O)CC</chem>                                                                                                 |
| C3638 | PS | Substrate    | 69             | <chem>CNCC(O)c1cc(OC(=O)C(C)(C)C)c(OC(=O)C(C)(C)C)cc1</chem>                                                                                            |
| C3639 | PS | Substrate    | 45,52,69,128,3 | <chem>COc1c(OCCNCC(O)COc2c3c([nH]c4c3cccc4)ccc2)cccc1</chem>                                                                                            |
| C3640 | PS | Substrate    | 81             | <chem>OC(=O)C(O/N=C\(\C(=O)NC1C(=O)N2C(=C(C[n+]3ccccc3)CSC12)C(=O)[O-])/c1csc(n1)N(C)C</chem>                                                           |
| C3641 | PS | Substrate    | 69,171,52,53,6 | <chem>CCOe1ccc(cc1)c1nc2ccc(cc2[nH]1)c1nc2c([nH]1)ccc(c2)N1CCN(C)CC1</chem>                                                                             |
| C3642 | PS | Substrate    | 52,90,95       | <chem>Nc1nc(N)c(nn1)c1c(Cl)c(Cl)ccc1</chem>                                                                                                             |
| C3643 | PS | Substrate    | 63,169,49,52,5 | <chem>COC(=O)c1ccccc1c1c2ccc(=NH2+)cc2oc2c1ccc(N)c2</chem>                                                                                              |
| C3644 | PS | Substrate    | 171,52,53,68,6 | <chem>CC(C)(C)NC(=O)C1CC2CCCC2CN1CC(O)C(Cc1ccccc1)NC(=O)C(CC(=O)N)NC(=O)c1ccc2cccc2n1</chem>                                                            |
| C3645 | PS | Substrate    | 125            | <chem>O=C1CCc2c(N1)ccc(OCCCCe1nnnn1C1CCCCC1)c2</chem>                                                                                                   |
| C3646 | PS | Nonsubstrate | 68,74,86,89,1  | <chem>COc1cc(NC(=O)c2cc3cccc3nc2)c(cc1OC)C(=O)Nc1ccc(CCN2CCc3cc(OC)c(OC)cc3C2)cc1</chem>                                                                |
| C3647 | PS | Nonsubstrate | 172            | <chem>Fe1cc(c(cc1)C(O)(Cn1cncn1)Cn1cncn1)F</chem>                                                                                                       |
| C3648 | PS | Nonsubstrate | 68             | <chem>CC(OCc1ccccc1)C1NC(=O)C(CCCCN)NC(=O)C(Cc2c[nH]c3ccccc23)NC(=O)C(Cc2ccccc2)NC(=O)CCCCCN1=O</chem>                                                  |
| C3649 | PS | Nonsubstrate | 125            | <chem>OC(COe1nsnc1N1CCOCC1)CNC(C)(C)C</chem>                                                                                                            |
| C3650 | PS | Nonsubstrate | 172            | <chem>O=C(OC)[C@@]1([C@@@H])([C@@]2(C=CCN3CC[C@@]4(c5c(N([C@@@H]14)C)cc(cc5)OC)[C@H]23)CC)OC(=O)C)O</chem>                                              |
| C3651 | PS | Nonsubstrate | 172            | <chem>O=S(=O)(C(C=NOC(=O)NC(C)C)C)C</chem>                                                                                                              |
| C3652 | PS | Nonsubstrate | 172            | <chem>O=C(O)c1c(cccc1)O</chem>                                                                                                                          |
| C3653 | PS | Nonsubstrate | 164,68         | <chem>CCCC/C=C\C/C=C\C=C/C=C/C/[C@@@H](SC[C@@@H](NC(=O)CC[C@@@H](N)C(=O)O)C(=O)NCC(=O)O)[C@@@H](O)CCCC(=O)O</chem>                                      |
| C3654 | PS | Nonsubstrate | 172            | <chem>O=C(O)[C@@@H]1CCCN1C(=O)[C@H](C)CS</chem>                                                                                                         |
| C3655 | PS | Nonsubstrate | 68             | <chem>CC1(C)SC2C(NC(=O)C(N)c3ccccc3)C(=O)N2C1C(=O)O</chem>                                                                                              |
| C3656 | PS | Nonsubstrate | 172            | <chem>Fe1cc2c(cc1)NC(=O)[C@@@H](N2C(=O)OC(C)C)CC</chem>                                                                                                 |
| C3657 | PS | Nonsubstrate | 172            | <chem>O=C(c1ccc2c(c1)nc([nH]2)NC(=O)OC)c1ccccc1</chem>                                                                                                  |
| C3658 | PS | Nonsubstrate | 0,163,49,53,96 | <chem>Cc1c(N/N=C\2/C(=O)c3c(cc(cc3N)S(=O)(=O)[O-])C=C2S(=O)(=O)[O-])ccc(c1)c1cc(C)c(N/N=C\2/C(=O)c3c(cc(cc3N)S(=O)(=O)[O-])C=C2S(=O)(=O)[O-])cc1</chem> |
| C3659 | PS | Nonsubstrate | 68             | <chem>NC(CCC(=O)O)C=C</chem>                                                                                                                            |
| C3660 | PS | Nonsubstrate | 172            | <chem>O[C@H](/C=C/CCCCCCCCCCCC)[C@@@H](N)CO</chem>                                                                                                      |
| C3661 | PS | Nonsubstrate | 172            | <chem>oc(=O)[C@H](C)[C@H]1[C@H]([C@H]([C@H]([C@H]1)C)C)[C@@@H](C)C(C)C1</chem>                                                                          |
| C3662 | PS | Nonsubstrate | 172            | <chem>O=C(NC1CCCCC1)NS(=O)(=O)c1ccc(cc1)CCNC(=O)c1c(ccc(c1)Cl)OC</chem>                                                                                 |
| C3663 | PS | Nonsubstrate | 172            | <chem>O[C@H]([C@H](O)CO)[C@H](O)[C@H](O)CO</chem>                                                                                                       |
| C3664 | PS | Nonsubstrate | 172            | <chem>O=C1C(C(=O)N(N1c1ccccc1)c1ccccc1)CCS(=O)c1ccccc1</chem>                                                                                           |
| C3665 | PS | Nonsubstrate | 172            | <chem>O=C1N(C(=O)c2ccccc12)CSP(=S)(OC)OC</chem>                                                                                                         |
| C3666 | PS | Nonsubstrate | 125            | <chem>NS(=O)(=O)c1c(OC)ccc(c1)CC(NCCOe1ccccc1OCC)C</chem>                                                                                               |
| C3667 | PS | Nonsubstrate | 172            | <chem>O=C(Nc1ccc(cc1)O)C</chem>                                                                                                                         |
| C3668 | PS | Nonsubstrate | 68,70,74       | <chem>Nc1nc(=O)n(cc1)C1OC(CO)C(O)C1(F)F</chem>                                                                                                          |
| C3669 | PS | Nonsubstrate | 70             | <chem>Cc1ncc(CNC(=O)N(CCC1)N=O)c(N)n1</chem>                                                                                                            |
| C3670 | PS | Nonsubstrate | 172            | <chem>O=c1n(nnn1CCN1CCC(CC1)(N(c1ccccc1)C(=O)CC)COC)CC</chem>                                                                                           |
| C3671 | PS | Nonsubstrate | 172            | <chem>n1c(c(nc2c1c(nc(n2)N)N)N)c1ccccc1</chem>                                                                                                          |
| C3672 | PS | Nonsubstrate | 172            | <chem>O[C@H]1CC[C@@]2([C@@@H]3[C@@@H](CC=C2C1)[C@H]1[C@@](CC3)([C@H](CC1)[C@H](C)CC[C@@@H](CC)C(C)C)C)C</chem>                                          |
| C3673 | PS | Nonsubstrate | 172            | <chem>O=C(OC1c[n+](ccc1)C)N(C)C</chem>                                                                                                                  |
| C3674 | PS | Nonsubstrate | 172            | <chem>O(c1c(cc2c(c1)CCN([C@H]2Cc1c(cc(c1)OC)OC)Oc1cc2c(cc1OC)c1c(cc3c1[C@H](C2)N(CCC3)C)OC)OC)OC)C</chem>                                               |
| C3675 | PS | Nonsubstrate | 172            | <chem>O=C(N(C)C)Cc1n2cc(ccc2nc1c1ccc(cc1)C)C</chem>                                                                                                     |
| C3676 | PS | Nonsubstrate | 172            | <chem>Clc1c(c(ccc1)Cl)CC(=O)N=C(N)N</chem>                                                                                                              |
| C3677 | PS | Nonsubstrate | 172            | <chem>O=C1CC[C@H]2C(=C1)CC[C@H]1[C@H]3[C@@]([C@H]21)([C@](CC3)(C#C)O)C</chem>                                                                           |
| C3678 | PS | Nonsubstrate | 172            | <chem>O=c1c2ccccc2n(c2ccccc12)CCCN1c2c(c(=O)c3ccccc13)cccc2</chem>                                                                                      |

|       |    |              |               |                                                                                                       |
|-------|----|--------------|---------------|-------------------------------------------------------------------------------------------------------|
| C3679 | PS | Nonsubstrate | 172           | O=C(N1CCN(CC1)c1ccc(cc1)OC[C@H]1CO[C@](O1)(c1c(cc(cc1)Cl)Cl)Cn1ence1)C                                |
| C3680 | PS | Nonsubstrate | 172           | C#CCN([C@@H](Cc1ccccc1)C)C                                                                            |
| C3681 | PS | Nonsubstrate | 145           | CC(C)(Oc1ccc(CCNC(=O)c2ccc(Cl)cc2)cc1)C(=O)O                                                          |
| C3682 | PS | Nonsubstrate | 172           | S=c1c(c2c(c(n1C1C(C(O)C(C(O1)CO)O)O)c1secc1)CCc1c2ccccc1)C#N                                          |
| C3683 | PS | Nonsubstrate | 145           | Cc1ccc(C)c(OCCCC(C)(C)C(=O)O)c1                                                                       |
| C3684 | PS | Nonsubstrate | 172           | O=C(O)[C@@H](N)Cc1ccc(cc1)N(CCC1)CCCl                                                                 |
| C3685 | PS | Nonsubstrate | 155           | COc1c(cccc1)N1CCN(CC(O)c2c(Cc3ccccc3)c3ccccc3o2)CC1                                                   |
| C3686 | PS | Nonsubstrate | 172           | CCC(=C(c1ccccc1)c1ccc(cc1)OCCN(C)C)c1ccccc1                                                           |
| C3687 | PS | Nonsubstrate | 172           | O=C(O)[C@@H]1[C@H]([C@@H]([C@@H]([C@@H]2CN3CCc4c5ccc(cc5[nH]c4[C@H]3C[C@H]12)OC)O)OC                  |
| C3688 | PS | Nonsubstrate | 172           | O=S(=O)(Nc1ccc(on1)C)c1ccc(cc1)N                                                                      |
| C3689 | PS | Nonsubstrate | 172           | CC(=O)OC1C(C(C(OC1n1c(=S)c(C#N)c(c(c1C)C(=O)OCC)c1ccc(cc1)Cl)COC(=O)C)OC(=O)C)OC(=O)C                 |
| C3690 | PS | Nonsubstrate | 172           | O=C(N)N1c2c(C=Cc3ccccc13)ccccc2                                                                       |
| C3691 | PS | Nonsubstrate | 172           | Cn1c2ccccc2c2c1C(=O)N(CC2)CCCCN(C)C                                                                   |
| C3692 | PS | Nonsubstrate | 172           | O=C1[C@H](C2SCC(=C(N12)C(=O)O)C[n+])1ccc(cc1)C(=O)N)NC(=O)C(c1ccccc1)S(=O)(=O)O                       |
| C3693 | PS | Nonsubstrate | 172           | Clc1cc(ccc1)N1CCN(CC1)CCCN1c(=O)n2ccccc2n1                                                            |
| C3694 | PS | Nonsubstrate | 172           | c12cc(OC)c(OC)cc1CCC=C2CCCN1CCc2c(C1)cc(OC)c(OC)c2                                                    |
| C3695 | PS | Nonsubstrate | 167,68,69,128 | CCOC(=O)C1=C(C)NC(=C(C1c1ccc(Cl)c1Cl)C(=O)OC)C                                                        |
| C3696 | PS | Nonsubstrate | 172           | O=C/C=C/c1ccc(cc1)O)CC(=O)/C=C/c1ccc(cc1)O                                                            |
| C3697 | PS | Nonsubstrate | 172           | Clc1c(n(c(n1)CCCC)Cc1ccc(cc1)c1c(cccc1)c1nn[nH]n1)C(=O)O                                              |
| C3698 | PS | Nonsubstrate | 172           | O=c1c(cc2CCCCCc2n1C1C(C(C(O1)COC(=O)C)OC(=O)C)OC(=O)C)OC(=O)C)OC(=O)C)C#N                             |
| C3699 | PS | Nonsubstrate | 172           | O=C(Nc1ccc(cc1)OCC(O)CNC(C)C)C                                                                        |
| C3700 | PS | Nonsubstrate | 172           | O=C(OC)[C@@H](N)CS                                                                                    |
| C3701 | PS | Nonsubstrate | 172           | FC(F)(F)c1cc(ncc1)Oc1ccc(cc1)OC(C)C(=O)OCCCC                                                          |
| C3702 | PS | Nonsubstrate | 125           | CN1CCC(CN2c3ccccc3Sc3c2ccccc3)C1                                                                      |
| C3703 | PS | Nonsubstrate | 172           | S=c1c(c(c(n1C1C(C(C(O1)COC(=O)C)OC(=O)C)OC(=O)C)OC(=O)C)c1ccccc1)C(=O)C)c1ccc(cc1)OC)C#N              |
| C3704 | PS | Nonsubstrate | 36            | COc1c2Oc3ccc(CC4N(C)CCc5cc(OC)c(O)c6c(OC)c(OC)c(Br)c7c6C(Cc(cc1)c2)N(C)CC7)cc45)cc3                   |
| C3705 | PS | Nonsubstrate | 93            | CCOC(=O)C1(CCN(CCCc2ccccc2)CC1)c1ccccc1                                                               |
| C3706 | PS | Nonsubstrate | 172           | OC(=O)c1cc(C(=O)O)ccc1c1c2c(cc(c2)CCCC(=O)O)O)oc2c1cc(c(=O)c2)CCCC(=O)O                               |
| C3707 | PS | Nonsubstrate | 172           | O=c1cc(oc2c1ccccc2)c1ccccc1                                                                           |
| C3708 | PS | Nonsubstrate | 172           | O=C1CC[C@@]2(C=C1)CC[C@H]1[C@@H]3CC[C@@]([C@@]3(CC[C@H]21)C)(O)C(=O)CO)C                              |
| C3709 | PS | Nonsubstrate | 163           | CC1OC(C(O)C(O)C1O)n1c(C)c(C(=O)C)c(c2ccco2)c(C#N)c1=S                                                 |
| C3710 | PS | Nonsubstrate | 172           | O=C1OCC2C(c3c(C12)c1cc(c(c1)OC)OC)OC)cc1OCOc1c3)N(C)C(=O)C                                            |
| C3711 | PS | Nonsubstrate | 146           | CC(C)NCC(O)COc1c2ccccc2ccc1                                                                           |
| C3712 | PS | Nonsubstrate | 172           | CC(=O)OCOC(=O)c1cc(C(=O)OCOC(=O)C)ccc1c1c2c(cc(c2)CCC(=O)OCOC(=O)C)O)oc2c1cc(c(=O)c2)CCC(=O)OCOC(=O)C |
| C3713 | PS | Nonsubstrate | 172           | OC[C@H]1Oe2c(O[C@@H]1c1ccc(c(c1)OC)O)cc(cc2)c1oe2c(c(cc(c2)O)O)c(=O)c1O                               |
| C3714 | PS | Nonsubstrate | 172           | [O-][N+](=O)c1c2cc3c(nc2ccc1)c1cc2c(c(=O)n1C3)COC(=O)[C@]2(O)CC                                       |
| C3715 | PS | Nonsubstrate | 172           | N#CC1=C(N(C=CC1c1ccccc1)c1ccccc1)C1C(C(C(C(O1)COC(=O)C)OC(=O)C)OC(=O)C)OC(=O)C)S                      |
| C3716 | PS | Nonsubstrate | 171           | CC(CCC(=O)NCCC[N+](C)(C)CCCS(=O)(=O)[O-])C1CCC2C3C(O)CC4CC(O)CCC4(C)C3CC(O)C12C                       |
| C3717 | PS | Nonsubstrate | 172           | Clc1ccc2c(c1)C(=NCC(=O)N2)c1ccccc1                                                                    |
| C3718 | PS | Nonsubstrate | 172           | c1ccc2c(c1)/C=C\CCN(C)C/c1c(C=C2)ccccc1                                                               |
| C3719 | PS | Nonsubstrate | 172           | Clc1ccc(cc1)C(c1ccccc1)CCN(C)C                                                                        |
| C3720 | PS | Nonsubstrate | 172           | S=C1N(C(=Nc2[n+](ccccc2)Cc2ccccc2)N(C1=Nc1ccccc1)c1ccccc1)c1ccccc1                                    |
| C3721 | PS | Nonsubstrate | 172           | COc1cccc(COc2ccccc2CCc2ccccc2)c1OC                                                                    |
| C3722 | PS | Nonsubstrate | 155           | CCCN(C)CC(O)COc1ccccc1C(=O)CCc1ccccc1                                                                 |
| C3723 | PS | Nonsubstrate | 172           | O=C1[C@H]2[C@H](CO1)Cc1cc3OCOc3cc1[C@H]2c1cc(c(c(c1)OC)OC)OC                                          |
| C3724 | PS | Nonsubstrate | 172           | S=c1c(c(cc(n1C1C(C(C(O1)CO)O)O)O)C)C)C#N                                                              |



|       |    |           |                |                                                                                                                                                                                                                               |
|-------|----|-----------|----------------|-------------------------------------------------------------------------------------------------------------------------------------------------------------------------------------------------------------------------------|
| C3771 | PS | Substrate | 172            | O=S(=O)(c1cccc1)CCc1cc2c(cc1)[nH]cc2C[C@H]1CCCN1C                                                                                                                                                                             |
| C3772 | PS | Substrate | 102            | CCCC1nc2c(cc(cc2C)e2nc3c(ccc3)n2C)n1Cc1ccc(cc1)c1ccccc1C(=O)O                                                                                                                                                                 |
| C3773 | PS | Substrate | 70             | cc1c@1(O)C1C@H1O1C@H2[C@@H]1(C@H1O1C@H3C1C@H1O1C@H4C(=O)C@H1(C)O4[C@@H]1(C)O3[C@@H]1(C)O2N(C)C)e2c(O)c3c(cc2[C@H]1C(=O)OC)C(=O)c1c(c(O)ccc1)C3=O                                                                              |
| C3774 | PS | Substrate | 102            | OC(=O)C1N2C(=O)C(NC(=O)c3c(OCC)ccc4cccc34)C2SC1(C)C                                                                                                                                                                           |
| C3775 | PS | Substrate | 166            | Fe1ccc(cc1)C(=O)CCCN1CCC2(CC1)N(CNC2=O)c1ccc(Br)cc1                                                                                                                                                                           |
| C3776 | PS | Substrate | 172            | O=C(O)Cc1cc2C(=CCCN(C)C)c3c(COe2cc1)cccc3                                                                                                                                                                                     |
| C3777 | PS | Substrate | 47             | CCCCCCCCCCCC[N+](C)(C)Cc1ccccc1                                                                                                                                                                                               |
| C3778 | PS | Substrate | 100            | CCCCOc1cc(cc1N)C(=O)OCCN(CC)CC                                                                                                                                                                                                |
| C3779 | PS | Substrate | 172            | Fe1ccc(cc1)C(=C1CCN(CC1)CCCC(=O)N1CCCC1)c1ccc(cc1)F                                                                                                                                                                           |
| C3780 | PS | Substrate | 140,49,96,41   | Ne1ccc(cc1)C(=C1C=C/C(=N)/C=C1)c1ccc(N)cc1                                                                                                                                                                                    |
| C3781 | PS | Substrate | 171            | CCC12C=CCN3CCC4(C13)C(N(C)c1cc(OC)ccc41)C(O)(C2CC(=O)C)C(=O)OC                                                                                                                                                                |
| C3782 | PS | Substrate | 172            | O=C(c1cc(nc2cccc12)OCCCC)NCCN(CC)CC                                                                                                                                                                                           |
| C3783 | PS | Substrate | 172            | O=c1[nH]e2ccenc2n(e2cccc12)C(=O)CN1CCN(CC1)C                                                                                                                                                                                  |
| C3784 | PS | Substrate | 131            | C[N+](C)(C)c1ccc(/C=C\C=C/C=C\C2ccccc2)cc1                                                                                                                                                                                    |
| C3785 | PS | Substrate | 172            | O=C(NC1CCCC1)Nc1ccc(cc1)OCC(O)CNC(C)(C)C                                                                                                                                                                                      |
| C3786 | PS | Substrate | 42             | C[P+](C)(c1ccccc1)c1ccccc1                                                                                                                                                                                                    |
| C3787 | PS | Substrate | 134            | CC(C)CC(NC(=O)C(Ce1ccccc1)NC(=O)CNC(=O)C(C)NC(=O)C(N)C)Cc1ccc(O)cc1)C(=O)Oe1ccccc1/C=C\C(=O)C                                                                                                                                 |
| C3788 | PS | Substrate | 145,81         | o1c@H1[C@@H]1O1C@H2[C@@H]1C@H1O1C@H3O1C@H4[C@@H]1C@H1O1C@H5OC3[C@@H]1C@H1O1C@H6OC3[C@@H]1C(=O)O1C@H7CC1C@H1O1C@H8OC1C@H9O1C@H10N(C)C1C@H11C1C@H12(O)C)C)O1C@H13C1C@H14N(C)C                                                   |
| C3789 | PS | Substrate | 145,52         | COe1ccc(cc1)C(CN(C)C)C1(O)CCCCC1                                                                                                                                                                                              |
| C3790 | PS | Substrate | 100            | CN(C)CCOC(C)(e1ccccc1)c1ccc(Cl)cc1                                                                                                                                                                                            |
| C3791 | PS | Substrate | 68             | CCC1CN2CCc3cc(OC)c(OC)cc3C2CC1CC1NCCe2c1[nH]c1c2cc(O)cc1                                                                                                                                                                      |
| C3792 | PS | Substrate | 172            | Oe1ccc2c(c1)CC[C@H]1[C@H]3[C@@H]1(CC[C@H]21)[C@H](CC3)(C#C)O                                                                                                                                                                  |
| C3793 | PS | Substrate | 172            | O=C1c2cccc2C(=O)e2c(c3c(c(c12)O)[C@H](C[C@@H]1)(C3)O)C(=O)O[C@H]1C[C@@H]([C@@H]([C@@H](O1)C)O)N)O                                                                                                                             |
| C3794 | PS | Substrate | 172            | [N-]=[N+]=Nc1cc(ccc1)CCN(C)CCCC(C#N)(c1cc(c(c(c1)OC)OC)OC)C(C)C                                                                                                                                                               |
| C3795 | PS | Substrate | 155            | CCNCC(O)c1c(CC)c2ccccc2o1                                                                                                                                                                                                     |
| C3796 | PS | Substrate | 172            | O=C(Nc1cc(c(cc1)OCC(O)CNC(C)C)C(=O)C)CCC                                                                                                                                                                                      |
| C3797 | PS | Substrate | 100            | COe1cc2c(cc1)nc2c2C(=O)C1CC2CCN1CC2C=C                                                                                                                                                                                        |
| C3798 | PS | Substrate | 172            | O=C1C(O)C(C)C(C)CC(=O)N1CCCN1CCN(CC1)c1ncccc1                                                                                                                                                                                 |
| C3799 | PS | Substrate | 172            | O=C1[C@H](C2SCC(=C(N12)C(=O)O)CSc1n(mnn1)C)(OC)NC(=O)C1S/C(=C\C(=O)N)/C(=O)O)/S1                                                                                                                                              |
| C3800 | PS | Substrate | 145,69,81,128  | o1c@H11c@H21C@H3[C@@H]1O1C@H42C@H5(C)O1C@H6OC(=O)C(=O)O1C@H7C)CC=C=C1C@H8O1C@H9C1C@H10C1C@H11C1C@H12CC=O)O1C@H13C1C@H14O1C@H15O1C@H16O1C@H17O1C@H18O1C@H19O1C@H20C@H21C@H22C@H23C@H24C@H25C@H26C@H27C@H28C@H29C@H30C@H31N(C)C |
| C3801 | PS | Substrate | 172            | O=C[C@@H](NC(=O)[C@@H](NC(=O)[C@@H](NC(=O)C)CC(C)C)CC(C)C)CCCN=C(N)N                                                                                                                                                          |
| C3802 | PS | Substrate | 52,53,54,69,85 | OC(CN1CCN(Ce2cnc2)CC1C(=O)NC(C)(C)C)C(C(=O)NC1c2cccc2CC1O)Cc1ccccc1                                                                                                                                                           |
| C3803 | PS | Substrate | 172            | O=C(/C=C/c1cccc(n1)/C(=C\CN1CCCC1)/c1ccc(cc1)C)O                                                                                                                                                                              |
| C3804 | PS | Substrate | 172            | Clc1ccc2c(ccnc2c1)NC(C)CCN(CC)CC                                                                                                                                                                                              |
| C3805 | PS | Substrate | 172            | O=c1c2c(cc3n1Cc1c(c4c(nc31)cccc4)CCNC(C)C)[C@@H](C(=O)OC2)(O)CC                                                                                                                                                               |
| C3806 | PS | Substrate | 172            | CN(C)c1ccc2c(c3ccc(=[N+](C)C)cc3se2c1)c1ccccc1                                                                                                                                                                                |
| C3807 | PS | Substrate | 100            | CCSc1cc2c(Sc3cccc3N2CCN2CCN(C)CC2)cc1                                                                                                                                                                                         |
| C3808 | PS | Substrate | 172            | N#C/N=C(\NC1CCCC1)/NS(=O)(=O)c1ccc(cc1)CCNC(=O)c1c(ccc(c1)Cl)OC                                                                                                                                                               |
| C3809 | PS | Substrate | 45             | CCCNCC(O)COe1ccc(O)cc1C(=O)CCc1ccccc1                                                                                                                                                                                         |
| C3810 | PS | Substrate | 172            | Clc1ccc2c(c1)CCc1ccnc1C2=C1CCNCC1                                                                                                                                                                                             |
| C3811 | PS | Substrate | 172            | CN1CCN(CC1)C1=Nc2c(Nc3c1cccc3)ccc(c2)Cl                                                                                                                                                                                       |
| C3812 | PS | Substrate | 99             | COe1cccc2c1CCCC2CCCN1CCN(CC1)C1CCCCC1                                                                                                                                                                                         |
| C3813 | PS | Substrate | 172            | O=C(O)[C@@H]1[C@H]([C@@H]([C@H]([C@@H](O1)O)c1cc2c(cc1)[C@H]1CC[C@H]3[C@@H](CC[C@H]3[C@H]1CC2)O)C)O)O                                                                                                                         |
| C3814 | PS | Substrate | 71             | OC1CC2=CCC3C4CCC(C(=O)C)C4(C)CCC3C2(C)CC1                                                                                                                                                                                     |
| C3815 | PS | Substrate | 172            | O=C(O)c1ccc(cc1)O)OC(C)Cc1c(c(c2C(=O)C=C(c3c2c1c1c2c(C(=O)C=C(c32)OC)c(c(c1CC(OC(=O)c1ccccc1)C)OC)O)OC)O)OC                                                                                                                   |
| C3816 | PS | Substrate | 172            | O=C1CC[C@H]2([C@@H]3[C@@H]1CC[C@H]2C1)[C@@H]1CC[C@@H]([C@@H]1(C3)C)O)C                                                                                                                                                        |



|       |    |              |                |                                                                                                                                                                      |
|-------|----|--------------|----------------|----------------------------------------------------------------------------------------------------------------------------------------------------------------------|
| C3863 | PS | Substrate    | 172            | c12ccc(OC)cc1CCCC2CCCN1CCc2c(C1)cc(OC)c(OC)c2                                                                                                                        |
| C3864 | PS | Substrate    | 172            | OCC(=O)C1(Cc2c(c3C(=O)c4cccc(e4C(=O)c3c(c2C(C1)OC1OC(C(C(C1)N)O)C)O)OC)O)O                                                                                           |
| C3865 | PS | Substrate    | 172            | O=C(C=CO)C@H]C@]2[C@@]CC1)[C@H][C@H]C@H20]C@]2[C@H]CC1)C@H]CC2)O[C@H]C[C@@H]([C@H]([C@H]O1)C)O[C@H]C[C@@H]([C@H]([C@H]O1)C)O)O)O)O)O)O)C                             |
| C3866 | PS | Substrate    | 52,65,68,89    | Cc[C@@H]C)C@H]O[C@]2[C@H]3[C@H]C=C(C)[C@H]O[C@H]4[C@H]OC)C@H]O[C@H]5[C@H]OC)C@H]O)C@H]([C@]O5)C@H]O4)C@H]C)C=C=C4CO)C@H]5[C@H]O)C=C(C@H]C(=O)O3)C@H]45O)CO2)C=C@H]1C |
| C3867 | PS | Substrate    | 172            | Oc1ccc(cc1)c1[nH]c(e2n(c1)c(=O)c(n2)Cclcccc1)Cc1cccc1                                                                                                                |
| C3868 | PS | Substrate    | 172            | O=C(C=CO)C@H]C@]2[C@@]CC1)[C@H][C@H]C@H20]C@]2[C@H]CC1)C@H]CC2)O[C@H]C[C@@H]([C@H]([C@H]O1)C)O[C@H]C[C@@H]([C@H]([C@H]O1)C)O)O)O)O)O)O)C                             |
| C3869 | PS | Substrate    | 172            | c12cc(OC)ccc1CCC=C2CCCN1CCc2c(C1)cc(OC)c(OC)c2                                                                                                                       |
| C3870 | PS | Nonsubstrate | 172            | O=C1C(C(CN1CC)CCN1CCOCC1)(c1cccc1)c1cccc1                                                                                                                            |
| C3871 | PS | Nonsubstrate | 172            | CC(=O)CC(c1c(=O)oc2ccccc2c1O)c1cccc1                                                                                                                                 |
| C3872 | PS | Nonsubstrate | 172            | S1c2c(N(c3cccc13)CC(N(C)C)C)cccc2                                                                                                                                    |
| C3873 | PS | Nonsubstrate | 75             | COC1CN(CCO1)C1CC(OC2CC(O)(Cc3c(O)c4c(c(O)c23)C(=O)c2c(cccc2OC)C4=O)C(=O)CO)OC(C)C1O                                                                                  |
| C3874 | PS | Nonsubstrate | 172            | O=C(OCC(COC(=O)N)(C)CCC)N                                                                                                                                            |
| C3875 | PS | Nonsubstrate | 172            | Fe1ccc(cc1)C1(c2ccc(cc2CO1)C#N)CCCN(C)C                                                                                                                              |
| C3876 | PS | Nonsubstrate | 149,170,53,96  | OC(=O)C1=C/C(=N)Nc2ccc(cc2)S(=O)(=O)Nc2cccn2)/C=CC1=O                                                                                                                |
| C3877 | PS | Nonsubstrate | 172            | Oc1ccc(cc1)c1[nH]c(e2n(c1)c(=O)c(n2)Cclcccc2cc1)Cc1cccc1                                                                                                             |
| C3878 | PS | Nonsubstrate | 163            | COc1cccc1NS(=O)(=O)c1c(OCCOe2ccc(cc2)C(C)(C)C)ccc(c1)C(C)C                                                                                                           |
| C3879 | PS | Nonsubstrate | 172            | O=C(OOC(=O)OCc1cccc1)OCc1cccc1                                                                                                                                       |
| C3880 | PS | Nonsubstrate | 172            | OC(=O)c1cccc(c1)NC(=O)[C@@H]1C[C@]@H](CN1)SC1=C(N2C([C@H]1C)[C@H](C2=O)[C@H](O)C)C(=O)O                                                                              |
| C3881 | PS | Nonsubstrate | 172            | COc1c(cc2c(c1)sc(e2)C1=NNC(=O)CC1C)OC                                                                                                                                |
| C3882 | PS | Nonsubstrate | 172            | [n+]1(ccc(cc1)c1cc[n+](cc1)C)C                                                                                                                                       |
| C3883 | PS | Nonsubstrate | 125            | Cc1nnc2CN=C(c3cccc3Cl)c3cc(Cl)ccc3n12                                                                                                                                |
| C3884 | PS | Nonsubstrate | 3,171,49,53,68 | CC(=CCC/C(=C\CC/C(=C\CSCC(N(C(=O)O)/C)/C)C                                                                                                                           |
| C3885 | PS | Nonsubstrate | 172            | Clc1c(cc(c1)OP(=S)(OC)c1cccc1)Cl)Br                                                                                                                                  |
| C3886 | PS | Nonsubstrate | 172            | O=C(O)CN(CC(=O)O)Cc1c(cc2c(c1)C1(c3ccc(c(c3O2)O)CN(CC(=O)O)CC(=O)O)c2c(C(=O)O1)cccc2)O                                                                               |
| C3887 | PS | Nonsubstrate | 172            | O=C1CC2(CC(=O)N1CCCCN1CCN(CC1)c1nccn1)CCCC2                                                                                                                          |
| C3888 | PS | Nonsubstrate | 5,68,69,86,128 | CC#CC1(O)CCC2C3CCC4=CC(=O)CCC4=C3C(CC12C)c1ccc(cc1)N(C)C                                                                                                             |
| C3889 | PS | Nonsubstrate | 172            | Fe1ccc2n3cnc(c3CN(C(=O)c2c1)C)C(=O)OCC                                                                                                                               |
| C3890 | PS | Nonsubstrate | 172            | c1nc2ccccc2n1Cc1cccc(c1)c1n[nH]nn1                                                                                                                                   |
| C3891 | PS | Nonsubstrate | 172            | FC(F)(F)c1ccc(cc1)OC(c1cccc1)CCNC                                                                                                                                    |
| C3892 | PS | Nonsubstrate | 172            | ClC(Cl)(Cl)C(c1ccc(cc1)OC)c1ccc(cc1)OC                                                                                                                               |
| C3893 | PS | Nonsubstrate | 172            | O=c1n(c(c1)C)C)c1cccc1                                                                                                                                               |
| C3894 | PS | Nonsubstrate | 68,86          | ClC(Cl)C(c1ccc(Cl)cc1)c1cccc1Cl                                                                                                                                      |
| C3895 | PS | Nonsubstrate | 171,96,41      | Cc1cc(C)nc(NS(=O)(=O)c2ccc(NC(=O)COC(=O)c3c4nc5ccccc5c(O)c4ccc3)cc2)n1                                                                                               |
| C3896 | PS | Nonsubstrate | 171,96,41      | CC(C)C(=O)NC(C)C(=O)N(Cc1cc2c(ccc2)cc1)N=O                                                                                                                           |
| C3897 | PS | Nonsubstrate | 172            | O=C(O[C@H]1[C@H](Oe2c(C1)c(cc(c2)O)O)c1cc(c(c1)O)O)O)c1cc(c(c1)O)OC)O                                                                                                |
| C3898 | PS | Nonsubstrate | 172            | O=C1CC[C@]2([C@@]34CCN([C@]@H]2Cc2c3c(O[C@@H]14)c(cc2)O)CC1CC1)O                                                                                                     |
| C3899 | PS | Nonsubstrate | 172            | O=C(Nc1c(ccc1C)C)CN(CC)CC                                                                                                                                            |
| C3900 | PS | Nonsubstrate | 172            | O=C(c1[nH]c2ccccc2c1)N[C@]@H]1C(=O)N(c2ccccc2C(=N1)c1cccc1)C                                                                                                         |
| C3901 | PS | Nonsubstrate | 170,53,96      | NC(=N)N/N=C/c1c(Cl)cccc1Cl                                                                                                                                           |
| C3902 | PS | Nonsubstrate | 163            | COc1cc(cc(OC)c1O)C1C2C(COC2=O)C(OC2OC3COC4(CCN(C)CC4)OC3C(O)C2O)c2cc3c(OCO3)cc12                                                                                     |
| C3903 | PS | Nonsubstrate | 172            | OC(c1cccc1)(CCN1CCCC1)C1CC2=CC1C2                                                                                                                                    |
| C3904 | PS | Nonsubstrate | 172            | O=C(OCCN(Cc1cccc1)C)C1=C(NC(=C(C1c1ccc(cc1)[N+](=O)[O-])C(=O)OC)C)C                                                                                                  |
| C3905 | PS | Nonsubstrate | 172            | Fe1cc2c(nc1N1CCNCC1)n(cc(c2=O)C(=O)O)CC                                                                                                                              |
| C3906 | PS | Nonsubstrate | 157,68         | Cc1c(c(N)nc(N)n1)c1cc(Cl)c(Cl)cc1                                                                                                                                    |
| C3907 | PS | Nonsubstrate | 159,68         | CCCCN1C(=O)C(=C/C=C/C=C2/oc3ccccc3n2CCCS(=O)(=O)O)C(=O)N(CCCC)C1=S                                                                                                   |
| C3908 | PS | Nonsubstrate | 172            | Clc1ccc(cc1)N(C(=O)Cc1cccc1)C1CCN(CC1)C(C)C                                                                                                                          |

|       |    |              |                |                                                                                            |
|-------|----|--------------|----------------|--------------------------------------------------------------------------------------------|
| C3909 | PS | Nonsubstrate | 172            | Cn1c2c(cccc2)c(e1)C=CC(=O)c1c(OC)cc(OC)cc1OC                                               |
| C3910 | PS | Nonsubstrate | 149            | NC(=O)Cc1c(O)ccc(c1)/N=N\c1ccc(cc1)S(=O)(=O)Nc1ccccn1                                      |
| C3911 | PS | Nonsubstrate | 172            | O=C1C(C(N(C(C1C)e1cccc1)C)e1cccc1)C                                                        |
| C3912 | PS | Nonsubstrate | 145            | CC(C)OC(=O)C(C)(C)Oe1ccc(cc1)C(=O)c1ccc(Cl)cc1                                             |
| C3913 | PS | Nonsubstrate | 172            | O=C1c2cc(ccc2C2(O1)c1ccc(cc1Oe1cc(ccc21)O)O)C(=O)O                                         |
| C3914 | PS | Nonsubstrate | 172            | O=C(/C=C/C/C=C/C=C/C=C/C1=C(CCCC1(C)C)C)\C)\C)O                                            |
| C3915 | PS | Nonsubstrate | 155            | Ce1c(cccc1)N1CCN(CC(O)COc2ccccc2C(=O)CCc2ccccc2)CC1                                        |
| C3916 | PS | Nonsubstrate | 125            | COe1cc(C(O)C(C)N)c(OC)cc1                                                                  |
| C3917 | PS | Nonsubstrate | 172            | Clc1ccc(cc1)C(=NCCCC(=O)N)c1c(ccc(c1)F)O                                                   |
| C3918 | PS | Nonsubstrate | 145            | CC(NC(C)(C)C)C(=O)c1cccc(Cl)c1                                                             |
| C3919 | PS | Nonsubstrate | 172            | N#Cc1c(=O)nc([nH]c1c1ccc(cc1)C)SC                                                          |
| C3920 | PS | Nonsubstrate | 162,68         | Ne1nc(=O)n(cc1)C1COC(CO)O1                                                                 |
| C3921 | PS | Nonsubstrate | 172            | Clc1ccc(cc1)[C@@](OCC[C@H]1CCCN1C)(c1cccc1)C                                               |
| C3922 | PS | Nonsubstrate | 172            | O=C(OC)C1=C(NC(=C(C1c1c(cccc1)[N+](=O)[O-])C(=O)OC)C)C                                     |
| C3923 | PS | Nonsubstrate | 172            | N1=C(NCC1)CN1c2cccc2C(=CC(C1C)C)C                                                          |
| C3924 | PS | Nonsubstrate | 163            | COe1cc(cc(OC)c1OC)C1CC(C)(Oe2cc3c(OCO3)cc12)N1CCCC1                                        |
| C3925 | PS | Nonsubstrate | 172            | O=C(/C=C/C1cc(c(cc1)O)OC)CC(=O)/C=C/c1ccc(c(c1)OC)O                                        |
| C3926 | PS | Nonsubstrate | 172            | OCC=C(CCC=C(CCC=C(C)C)C)C                                                                  |
| C3927 | PS | Nonsubstrate | 172            | O=C(OC)Nc1[nH]c2cc(ccc2n1)SCCC                                                             |
| C3928 | PS | Nonsubstrate | 172            | OC(c1cccc1)(c1cccc1)C1CCNCC1                                                               |
| C3929 | PS | Nonsubstrate | 172            | O=C(c1cc(c(c1)OC)OC)OC)c1c2ccc(cc2[nH]c1)OC                                                |
| C3930 | PS | Nonsubstrate | 172            | N#CC1=C(N(C(=CC1c1cccc1)c1cccc1)C1C(C(C(O1)CO)O)O)O)S                                      |
| C3931 | PS | Nonsubstrate | 172            | O=C(Oc1c2ccccc2ccc1)NC                                                                     |
| C3932 | PS | Nonsubstrate | 172            | O=C1CC[C@@]2(C=C1)CC[C@H]1[C@@@H]3CC[C@@@H]([C@@@]3(CC[C@H]21)C)O)C                        |
| C3933 | PS | Nonsubstrate | 68             | Clc1ccc(Cn2cc(C(=O)C(=O)Nc3ccccc3)c3ccccc23)cc1                                            |
| C3934 | PS | Nonsubstrate | 172            | n1c2c(c(c3c1CCCC3)N)cccc2                                                                  |
| C3935 | PS | Nonsubstrate | 172            | Ce1ccc(/C(=C/CN2CCCC2)/c2nc(/C=C\C(=O)OC(C)C)ccc2)cc1                                      |
| C3936 | PS | Nonsubstrate | 172            | O=C(O)c1c(=O)c2cc(c(cc2n(c1)CC)N1CCN(CC1)C)F                                               |
| C3937 | PS | Nonsubstrate | 63,171,53,96,4 | CSc1nc(c2ccc(C)cc2)c(C#N)c(=O)[nH]1                                                        |
| C3938 | PS | Nonsubstrate | 172            | O=c1n(ccc(n1)N)[C@H]1[C@H]([C@@H]([C@H](O1)CO)O)O                                          |
| C3939 | PS | Nonsubstrate | 45             | NCC(O)COc1cccc1C(=O)CCc1cccc1                                                              |
| C3940 | PS | Nonsubstrate | 172            | O=C1c2c(c3ccc(cc3)OC)c(C#N)c(=S)n(c2CC(C)(C)C1)C1C(C(C(O1)COC(=O)C)OC(=O)C)OC(=O)C)OC(=O)C |
| C3941 | PS | Nonsubstrate | 172            | O1Cc2c(C(=CCN(C)C)c3ccccc13)cccc2                                                          |
| C3942 | PS | Nonsubstrate | 172            | O=S(c1ccc2c(c1)nc([nH]2)NC(=O)OC)c1cccc1                                                   |
| C3943 | PS | Nonsubstrate | 172            | [O-][N+](=O)c1ccc2c(c1)C(=NCC(=O)N2)c1cccc1                                                |
| C3944 | PS | Nonsubstrate | 172            | O=C(/C=C/c1ccc(c(c1)O)O)c1c(cc(c(c1)CC=C(C)C)O)O                                           |
| C3945 | PS | Nonsubstrate | 172            | O=C(O)c1c(=O)c2cc(c(cc2n(c1)C1CC1)N1CCNCC1)F                                               |
| C3946 | PS | Nonsubstrate | 172            | O=C1OCC2C(c3c(C(C12)c1cc(c(c1)OC)OC)OC)cc1OCCc1e3)N                                        |
| C3947 | PS | Nonsubstrate | 172            | O(c1c(ccc1)CC=C)CC(O)CNC(C)C                                                               |
| C3948 | PS | Nonsubstrate | 70             | CCc1c2cc(O)ccc2nc2e1Cn1c2cc2c(COC(=O)C2(O)CC)c1=O                                          |
| C3949 | PS | Nonsubstrate | 172            | CC(=O)OC1C(C(C(OC1n1c(=S)c(C#N)c(c(c1C)C(=O)C)c1cccc1)COC(=O)C)OC(=O)C)OC(=O)C             |
| C3950 | PS | Nonsubstrate | 172            | Oc1cc2oc(cc(=O)c2c(c1)O)c1cccc1                                                            |
| C3951 | PS | Nonsubstrate | 172            | c1ccc2c(c1)N(c1c(CC2)cccc1)CCNC                                                            |
| C3952 | PS | Nonsubstrate | 172            | S=c1c(cc2c(n1C1C(C(O)C(C(O1)CO)O)O)CCC2)C#N                                                |
| C3953 | PS | Nonsubstrate | 172            | CCC1(c2cc3c4nc5ccccc5cc4Cn3c(=O)c2COC1=O)O                                                 |
| C3954 | PS | Nonsubstrate | 172            | CC(=O)OC1C(C(C(OC1n1c(=S)c(cc2c1CCCCC2)C#N)COC(=O)C)OC(=O)C)OC(=O)C                        |

|       |    |           |               |                                                                                                                                                                               |
|-------|----|-----------|---------------|-------------------------------------------------------------------------------------------------------------------------------------------------------------------------------|
| C3955 | PS | Substrate | 55            | CC(N)C(=O)NC1C2C(O)C(O)CC(=O)C2=C(O)OC1(C)C(C)C1                                                                                                                              |
| C3956 | PS | Substrate | 172           | C1=CCCN(C)C                                                                                                                                                                   |
| C3957 | PS | Substrate | 172           | FC(F)(F)COc1ccnc(c1C)CS(=O)c1[nH]e2ccccc2n1                                                                                                                                   |
| C3958 | PS | Substrate | 63,69         | COe1ccc(cc1)C1C(=C(S)N(C2OC(COC(=O)C)C(OC(=O)C)C(OC(=O)C)C2OC(=O)C)C(=C1C(=O)C)c1ccccc1)C#N                                                                                   |
| C3959 | PS | Substrate | 68,88         | CC1(C)SSC(C)(C)C(NC(=O)C(N)Ce2ccc(O)cc2)C(=O)NCC(=O)NC(Cc2ccccc2)C(=O)NC1C(=O)O                                                                                               |
| C3960 | PS | Substrate | 172           | O=C(OCOC(=O)C)CN(c1ccc(cc1)OCCOc1c(N(CC(=O)OCOC(=O)C)CC(=O)OCOC(=O)C)ccc(c2c3c(cc4c2cc(Cl)c(=O)c4)cc(O)c(Cl)c3)c1)C)CC(=O)OCOC(=O)C                                           |
| C3961 | PS | Substrate | 5,52,77,104,1 | NS(=O)(=O)OCC12OC(OC1C1OC(OC1CO2)(C)C)(C)C                                                                                                                                    |
| C3962 | PS | Substrate | 172           | O=C(OCCNC(=O)c1ccc(cc1)N=[N+]=[N-])C1=C(NC(=C(C1c1c(cccc1)C(F)(F)F)C(=O)OCC)C)C                                                                                               |
| C3963 | PS | Substrate | 172           | N(=Cc1c2ccccc2c(c2ccccc12)C=NCC1=NCCN1)NC1=NCCN1                                                                                                                              |
| C3964 | PS | Substrate | 145           | O/C(=C/1\C(=O)C(N(C)C)C2C(O)C3C(=C(O)c4c(cccc4O)C3C)C(=O)C2(O)C1=O)/N                                                                                                         |
| C3965 | PS | Substrate | 41            | OC1CC2C(NC(=O)c3c(O)c4c(OCO4)cc23)C(O)C1O                                                                                                                                     |
| C3966 | PS | Substrate | 59            | CC(C)CC1N2C(=O)C(NC(=O)C3CC4C(Ce5c[nH]e6cccc4c56)N(C)C3)(OC2(O)C2CCCN2C1=O)C(C)C                                                                                              |
| C3967 | PS | Substrate | 39            | CC1=C(C=C)/C=C\c2c(C)c(CCC(=O)O)c(C[C@H]3N=C(/C=C\4/NC(=O)C(=C4C)C=C)C(=C3CCC(=O)O)C)[nH]2)/NC1=O                                                                             |
| C3968 | PS | Substrate | 172           | O=C(Oc1cc(ccc1)[N+](C)(C)N(C)C                                                                                                                                                |
| C3969 | PS | Substrate | 172           | n1c(ncc(c1N)Cc1cc(c(c1)OC)OC)OC)N                                                                                                                                             |
| C3970 | PS | Substrate | 63            | N1c2ccccc2P2(=c3ccccc3=Ne3ccccc23)c2ccccc12                                                                                                                                   |
| C3971 | PS | Substrate | 145           | N(/C(=C/[N+](=O)[O-])/NCCSCc1csc(n1)CN(C)C)C                                                                                                                                  |
| C3972 | PS | Substrate | 172           | CS(=O)(=O)N1CCN(CC1)[C@H]1CN(C1)CC[C@]1(CN(C(=O)CC1)CC1CC1)c1ccc(c(cc1)Cl)Cl                                                                                                  |
| C3973 | PS | Substrate | 68            | COe1ccc(CC2N(C)C(=O)C(C)NC(=O)C(C)NC(=O)C3Cc4cc(Oc5ccc(cc5)C(O)C(N(C)C(=O)C(C)NC2=O)C(=O)N3C)c(O)cc4)cc1                                                                      |
| C3974 | PS | Substrate | 172           | O=C(O[C@@H]1COCC1)N[C@@H](Cc1ccccc1)[C@H](O)CN(CC(C)C)S(=O)(=O)c1ccc(cc1)N                                                                                                    |
| C3975 | PS | Substrate | 172           | ClCc1ccc(cc1)Cn1c(=CC=CC2=N(c3c(O2)cccc3)C)n(c2cc(c(cc12)Cl)Cl)Cc1ccc(cc1)CC1                                                                                                 |
| C3976 | PS | Substrate | 172           | O[C@@H]1[C@@H]2Oc3c4[C@@@]52CCN([C@@H]([C@@H]5C=C1)Cc4ccc3O)C                                                                                                                 |
| C3977 | PS | Substrate | 172           | O=C1c2c3c4n(C5O[C@@](n6c4e(c2CN1)c1ccccc61)[C@@H]([C@@H](C5)NC)OC)C)C1ccccc31                                                                                                 |
| C3978 | PS | Substrate | 50            | OC1CC(O)CC(OC(=O)/C=C/c2cc(O)c(O)cc2)C1O)C(=O)O                                                                                                                               |
| C3979 | PS | Substrate | 172           | O=C1N[C@H]2CS[C@H]([C@H]2N1)CCCCC(=O)O                                                                                                                                        |
| C3980 | PS | Substrate | 172           | C[N+](=c1ccc2c(c3ccc(s3)C(=S)N3CCCC3)c3cc4CCCN5CCCc(c3sc2e1)c45)C                                                                                                             |
| C3981 | PS | Substrate | 172           | S1C2N(C(=C(C1)CSc1n(nnn1)C)C(=O)O)C(=O)C2NC(=O)C(NC(=O)N1C(=O)C(=O)N(CC1)CC)c1ccc(cc1)O                                                                                       |
| C3982 | PS | Substrate | 172           | O=S(=O)(N(c1nc(c(n1)C(C)C)/C=C/[C@@H](O)C[C@@H](O)CC(=O)O)c1ccc(cc1)F)C)C                                                                                                     |
| C3983 | PS | Substrate | 34            | ccc(C)C1N(C)C(=O)C(C)CC(N)C(=O)C(C)C(=O)O)C(O)C(N(C)C(=O)C(NC(=O)C(C)C)N(C)C(=O)C2CCCN2C(=O)C(C)OC(=O)C(Cc2ccc(OC)cc2)NC(=O)C(C)C)N(C)C(=O)CNC1=O)C(C)C                       |
| C3984 | PS | Substrate | 172           | O(c1ccc(cc1)C(C)(C)CC(C)(C)C)CCOCCOCCOCCOCCOCCOCCOCCOCCOCCOCCOCCOCCO                                                                                                          |
| C3985 | PS | Substrate | 172           | N#Cc1ccc(cc1)Cn1ene1CN1CCN(C(=O)C1)c1cc(ccc1)Cl                                                                                                                               |
| C3986 | PS | Substrate | 171,52,53,69, | CCC(=O)C(C)C(C)N(C)C)(c1ccccc1)c1ccccc1                                                                                                                                       |
| C3987 | PS | Substrate | 172           | S1C2N(C(=C(C1)CSc1nnc(s1)C)C(=O)O)C(=O)C2NC(=O)Cn1cnnn1                                                                                                                       |
| C3988 | PS | Substrate | 172           | Ne1c2c(c(c(cc2nc(c1)N1CCCN(CC1)C(=O)N1CCOCC1)OC)OC)c1ccc(cc1)F                                                                                                                |
| C3989 | PS | Substrate | 172           | Fe1ccc(cc1)C(=O)NCCN1CCN(CC1)c1c2OC[C@@H](Oe2ccc1)CO                                                                                                                          |
| C3990 | PS | Substrate | 68,101        | CC(C)CC1NC(=O)C(C)N(C)C(=O)CNC(=O)/C(=C/c2ccccc2)/N(C)C1=O                                                                                                                    |
| C3991 | PS | Substrate | 172           | CCC(=C(CC)c1ccc(cc1)O)c1ccc(cc1)O                                                                                                                                             |
| C3992 | PS | Substrate | 55            | COe1cccc2c1C(=O)c1c(O)c3c(CC(O)(CC3OC3CC(N)C(O)C(C)O3)/C(=N/NC(=O)c3ccccc3)/C)c(O)c1C2=O                                                                                      |
| C3993 | PS | Substrate | 145,52,69     | N1CCC(c2ccc(F)cc2)C(COe2cc3c(OCO3)cc2)C1                                                                                                                                      |
| C3994 | PS | Substrate | 172           | C1N(CCOCC1)C(=O)N[C@@H](Cc1ccccc1)C(=O)N[C@@H](CCc1ccccc1)/C=C/S(=O)(=O)c1ccccc1                                                                                              |
| C3995 | PS | Substrate | 145,68,81,39  | O/C(=C/1\C(=O)C(N(C)C)C2CC3C(=C(O)c4c(cccc4O)C3(O)C)C(=O)C2(O)C1=O)/N                                                                                                         |
| C3996 | PS | Substrate | 69,128        | CC(C)C1NC(=O)C(NC(=O)c2c3Nc4e(Oc3c(C)cc2)c(O)c2oc(=O)c(nc2c4C(=O)NC2(C)OC(=O)C(C)C)N(C)C(=O)C(N(C)C(=O)C3CCN3C(=O)C(NC2=O)C(C)C)c2ccccc2)C(C)OC(=O)C(C)C)N(C)C(=O)C2CCCN2C1=O |
| C3997 | PS | Substrate | 172           | NC(CC=C)c1c(cccc1)c1c2c(on1)cccc2                                                                                                                                             |
| C3998 | PS | Substrate | 172           | OC1=C(N(S(=O)(=O)c2ccsc12)C)C(=O)Nc1ncccc1                                                                                                                                    |
| C3999 | PS | Substrate | 172           | O=C(O)[C@H]1C(SC2[C@@H](C(=O)N12)NC(=O)[C@@H](c1ccc(cc1)O)N)(C)C                                                                                                              |
| C4000 | PS | Substrate | 135,52        | CCCCCCCC/C=C/CCCCCCCC(=O)OCCOCC(OCCO)C1OCC(OCCO)C1OCCO                                                                                                                        |









|       |    |              |     |                                                                                                                                                                                                    |
|-------|----|--------------|-----|----------------------------------------------------------------------------------------------------------------------------------------------------------------------------------------------------|
| C4139 | PI | Noninhibitor | 173 | c12c(oc(c(c1=O)OC)c1ccc(c(c1)OC)OC)cc(cc2O)OC                                                                                                                                                      |
| C4140 | PI | Noninhibitor | 173 | N1([C@@H](C[C@H]2[C@H](C1)CCCC2)C(=O)NC(C)(C)C)[C@@H]([C@@H](Cc1ccccc1)NC(=O)[C@@H](NC(=O)c1nc2c(cc1)cccc2)CC(=O)N)O                                                                               |
| C4141 | PI | Inhibitor    | 173 | c12N3CCCC1cc1c(c2CCC3)[se]c2c(c1c1sc(cc1)C(=S)N1CCCCC1)ccc(=[N+](C)C)c2                                                                                                                            |
| C4142 | PI | Noninhibitor | 173 | COc1cc2oc(cc(=O)c2c(OC)c1C)c1ccc1                                                                                                                                                                  |
| C4143 | PI | Noninhibitor | 173 | c1(c(c(c2c(c1)OC(c1ccccc1)CC2=O)O)C)OC                                                                                                                                                             |
| C4144 | PI | Noninhibitor | 173 | COc1ccc(cc1)c1cc(=O)c2c(OC)c(OC)c(OC)c(OC)c2o1                                                                                                                                                     |
| C4145 | PI | Noninhibitor | 173 | [C@@]12([C@@H]([C@@]3([C@@H]([C@@H]2O)C3)OC(=O)C)[C@@H]([C@@]2(C(=C([C@@H](C2)OC(=O)[C@@H]([C@@H](NC(=O)c2ccccc2)c2ccccc2)O)[C@@H](C1=O)OC(=O)C(C)O)OC(=O)c1ccccc1)C                               |
| C4146 | PI | Noninhibitor | 173 | c1(ccccc1)[P+](c1ccccc1)(c1ccccc1)c1ccc1                                                                                                                                                           |
| C4147 | PI | Noninhibitor | 173 | O1[C@@]2(C[C@@H]([C@@H]O[C@@H]3O[C@@H]([C@@H]N(C)C)[C@@H]3OC(=O)C)[C@@H]([C@@H]O[C@@H]3O[C@@H]([C@@H]OC(=O)C)[C@@H]OC3)C)[C@@H](C(=O)O)[C@@H]([C@@H]OC(=O)C)[C@@H](C2=O)C)C)C)C)C1                 |
| C4148 | PI | Noninhibitor | 173 | C(=O)(c1c(n(nc1C)C)OCC(CN(C(C)C)C(C)O)c1ccccc1                                                                                                                                                     |
| C4149 | PI | Noninhibitor | 173 | C(=O)(c1c(n(nc1C)c1ccccc1)OCC(CN(C(C)C)C(C)O)c1ccccc1                                                                                                                                              |
| C4150 | PI | Inhibitor    | 173 | c12C=C3C4C(c1sc1c(c2c2ccccc2)ccc(=[N+](C)C)c1)CCCN4CCCC3                                                                                                                                           |
| C4151 | PI | Inhibitor    | 173 | c12C=C3C4C(c1[se]c1c(c2c2ccccc2)ccc(=[N+](C)C)c1)CCCN4CCCC3                                                                                                                                        |
| C4152 | PI | Inhibitor    | 173 | c1cc2c(c3c([se]c2cc1N(C)C)ccc(=[N+](C)C)cc3)c1sc(cc1)C(=S)N1CCCCC1                                                                                                                                 |
| C4153 | PI | Inhibitor    | 173 | n1ccc(cc1)COc1c(cccc1)CCc1cccc(c1)OC                                                                                                                                                               |
| C4154 | PI | Inhibitor    | 173 | n1ccc(cc1)COc1c(cccc1)CCc1cccc1                                                                                                                                                                    |
| C4155 | PI | Inhibitor    | 173 | COc1c2c(=O)cc(oc2cc(c1)OC)c1cc(c(c1)OC)OC)OC                                                                                                                                                       |
| C4156 | PI | Inhibitor    | 173 | N1(Cc2c(CC1)cc(c(c2)OC)OC)CCCC1=CCC(c2c1ccccc2)OC                                                                                                                                                  |
| C4157 | PI | Inhibitor    | 173 | c1cc(c2c(c1)/C(=C/CCN1Cc3c(CC1)cc(c(c3)OC)OC)/CCC2)OC                                                                                                                                              |
| C4158 | PI | Inhibitor    | 173 | c1(OC)ccc2c(c1)/C(=C/CCN1Cc3c(CC1)cc(c(c3)OC)OC)/CCC2                                                                                                                                              |
| C4159 | PI | Inhibitor    | 173 | [C@@H]1(CN(CC1)Cc1ccccc1)OC(=O)C1=C(NC(=C([C@@H]1c1cc([N+](=O)[O-])ccc1)C(=O)OC)C)C                                                                                                                |
| C4160 | PI | Inhibitor    | 173 | [C@@H]1(C(=C(NC(=C1C(=O)OC)C)C(=O)OC1CN(Cc2ccccc2)CCC1)c1cc(ccc1)[N+](=O)[O-]                                                                                                                      |
| C4161 | PI | Inhibitor    | 173 | c12ccc(N(C)C)cc1sc1c(c2c2ccccc2)ccc(=[N+](C)C)c1                                                                                                                                                   |
| C4162 | PI | Inhibitor    | 173 | [C@@H]1(C[C@@H](OC)C2=C([C@@]3([C@@]([C@@H](C2=O)OC)(O)c2c3c(c(c3c2[C@@H](C[C@H](O3)c2ccccc2)O)OC)OC)O1)c1ccccc1                                                                                   |
| C4163 | PI | Inhibitor    | 173 | c12n(c3c(nc1cc/c(=N/C(C)C)/e2)Nc1ccc(Cl)cc1)ccccc3)c1ccc(cc1)Cl                                                                                                                                    |
| C4164 | PI | Inhibitor    | 173 | O1CCN(CCCNC(=O)c2c(OCC)cccc2)CC1                                                                                                                                                                   |
| C4165 | PI | Inhibitor    | 173 | C1(C(=O)N(c2c(S[C@@H]1c1ccc(cc1)OC)cccc2)CCN(C)C)OC(=O)C                                                                                                                                           |
| C4166 | PI | Inhibitor    | 173 | C1(C(=C(NC(=C1C(=O)OCCN(c1ccccc1)Cc1ccccc1)C)C)P1(=O)OCC(CO1)(C)C)c1cc(ccc1)[N+](=O)[O-]                                                                                                           |
| C4167 | PI | Inhibitor    | 173 | c12c(c(ccc1)OC)[nH]c1c(c2=O)cccc1C(=O)Nc1ccc(cc1)CCN1CCc2c(C1)cc(c(c2)OC)OC                                                                                                                        |
| C4168 | PI | Inhibitor    | 173 | c1(C(C#N)(C(C)C)CCN(CCc2cc(c(cc2)OC)OC)C)cc(c(c(c1)OC)OC)OC                                                                                                                                        |
| C4169 | PI | Inhibitor    | 173 | n1(c(=O)n(nc1)C(CC)C)c1ccc(N2CCN(c3ccc(OC[C@@H]4O[C@@](c5c(cc(cc5)Cl)Cl)(Cn5nnc5)OC4)cc3)CC2)cc1                                                                                                   |
| C4170 | PI | Inhibitor    | 173 | c12ccc(N(C)C)cc1[se]c1c(c2c2ccccc2)ccc(=[N+](C)C)c1                                                                                                                                                |
| C4171 | PI | Inhibitor    | 173 | C1=C([C@@H]([C@@H](C=C=C2[C@@]3([C@@H](C(=O)O)[C@@H]4[C@@H](C1)O[C@@]1(C4)CC[C@@H]([C@@H]O1)[C@@H](CC)C)C=C([C@@H]([C@@H]3OC2)O)O)C)[C@@H]O1C)[C@@H]([C@@H](C1)OC)O[C@@H]([C@@H]([C@@H](O1)O)O)C)C |
| C4172 | PI | Inhibitor    | 173 | C1([C@H]2c3c(cccc3)[C@@H](c3c([C@@H]12)cccc3)N1CCN(CC1)C[C@H](COc1c2c(nc2)ccc1)O)(F)F                                                                                                              |
| C4173 | PI | Inhibitor    | 173 | C1(C(=C(NC(=C1C(=O)OC)C)C(=O)OCCN1CCN(CC1)C(c1ccccc1)c1ccccc1)c1cc(ccc1)[N+](=O)[O-]                                                                                                               |
| C4174 | PI | Inhibitor    | 173 | N(c1c(cccc1)CCc1cccc(c1)OC)Cc1cc(ccc1)OC                                                                                                                                                           |
| C4175 | PI | Inhibitor    | 173 | N(c1c(cccc1)CCc1cccc(c1)OC)Cc1c(c(ccc1)OC)OC                                                                                                                                                       |
| C4176 | PI | Inhibitor    | 173 | N(c1c(cccc1)CCc1cccc(c1)OC)Cc1cc(c(cc1)OC)OC                                                                                                                                                       |
| C4177 | PI | Inhibitor    | 173 | N(c1c(cccc1)CCc1cccc(c1)OC)Cc1cc(cc(c1)OC)OC                                                                                                                                                       |
| C4178 | PI | Inhibitor    | 173 | c1(ccccc1CCc1cccc1)OCc1c(c(ccc1)OC)OC                                                                                                                                                              |
| C4179 | PI | Inhibitor    | 173 | C1(=O)C2=CC[C@H](c3ccccc3)O[C@@]32[C@](C(=C1OC)OC)(c1c(c2c(c(c1OC)OC)O[C@H](C[C@@H]2O)c1ccccc1)O3)OC                                                                                               |
| C4180 | PI | Inhibitor    | 173 | C1(=O)C2=CC[C@H](c3ccccc3)O[C@@]32[C@](C(=C1OC)OC)(c1c(c2c(c(c1OC)OC)O[C@H](C[C@@H]2OC)c1ccccc1)O3)OC                                                                                              |
| C4181 | PI | Inhibitor    | 173 | C1(=C(NC(=C([C@@H]1c1ccccc1)[N+](=O)[O-])C(=O)OC)C)C(=O)OCCCN1CCC(CC1)(c1ccccc1)c1ccccc1                                                                                                           |
| C4182 | PI | Inhibitor    | 173 | C1(=C(NC(=C(C1c1cc([N+](=O)[O-])ccc1)C(=O)OC)C#N)C)C(=O)OC(C)C                                                                                                                                     |
| C4183 | PI | Inhibitor    | 173 | C1(=C(NC(=C(C1c1c([N+](=O)[O-])ccc1)C(=O)OC)C)C(=O)OCC(C)C                                                                                                                                         |
| C4184 | PI | Inhibitor    | 173 | O(c1cc(C(C)C)C)CCCNCc2cc(OC)c(OC)cc2)C#N)ccc1OC)C                                                                                                                                                  |



|       |    |              |     |                                                                                                                                |
|-------|----|--------------|-----|--------------------------------------------------------------------------------------------------------------------------------|
| C4231 | PI | Noninhibitor | 175 | <chem>c12c(cccc1)nc(cc2C(=O)NCCCNCNC(=O)c1cccc(c1)OCc1cccc1)OCc1cccc1)c1cccc1</chem>                                           |
| C4232 | PI | Noninhibitor | 175 | <chem>c1cc(c(cc1CN1CCCN(Cc2ccc(c(e2)OC)OC)C1c1ccc(cc1)N(CCCI)CC1)OC)OC</chem>                                                  |
| C4233 | PI | Noninhibitor | 175 | <chem>c1cc(c(cc1CN1CCCN(Cc2ccc(c(e2)OC)OC)C1c1ccc(cc1)N(CCCI)CC1)OC)OC</chem>                                                  |
| C4234 | PI | Inhibitor    | 175 | <chem>c1ccc(cc1)CN(c1cccc1)C[C@H](COCC(C)C)N1CCCC1</chem>                                                                      |
| C4235 | PI | Noninhibitor | 175 | <chem>c1cc(c(cc1CN1CCCN(Cc2ccc(c(e2)OC)OC)C1c1ccc(cc1)N(CCCI)CC1)OC)OC</chem>                                                  |
| C4236 | PI | Noninhibitor | 175 | <chem>c12c(cccc2)c(ccc1)CN(C/C=C/c1cccc1)C</chem>                                                                              |
| C4237 | PI | Noninhibitor | 175 | <chem>c1cc(c2c3c1C[C@@H]1[C@@]4(CC[C@@H]([C@@H]([C@]34CCN1CC1CCC1)O2)O)O)O</chem>                                              |
| C4238 | PI | Noninhibitor | 175 | <chem>c1cc(c2c3c1C[C@@H]1[C@@]4(CCC(=O)[C@@H]([C@]34CCN1CC=C)O2)O)O</chem>                                                     |
| C4239 | PI | Noninhibitor | 175 | <chem>c1cc(c2c3c1C[C@@H]1[C@@]4(CCC(=O)[C@@H]([C@]34CCN1CC1CC1)O2)O)O</chem>                                                   |
| C4240 | PI | Noninhibitor | 175 | <chem>c12c(cccc1)[nH]c1c2C[C@@]2([C@@]34c5c(ccc(c5O[C@@H]14)O)C[C@@H]2N(CC3)CC1CC1)O</chem>                                    |
| C4241 | PI | Noninhibitor | 175 | <chem>c1ccc(cc1)[C@@H]1c2cccc(c2)CN(C1)C)N</chem>                                                                              |
| C4242 | PI | Noninhibitor | 175 | <chem>c1ccc(cc1)C1=NCC(=O)Nc2ccc(cc12)Cl</chem>                                                                                |
| C4243 | PI | Inhibitor    | 175 | <chem>c1cc(cc1)OC[C@@H](CNCCc1ccc(c(c1)OC)OC)O)C</chem>                                                                        |
| C4244 | PI | Noninhibitor | 175 | <chem>c1ccc2c(c1)/C(=C/[C@@H]1C3CCN(CC3)C1)/c1ccc(cc1S2)Cl</chem>                                                              |
| C4245 | PI | Noninhibitor | 175 | <chem>c12c(ccc2)c(c(c1)OC)OC[C@@H](C)NCCC(=O)c1cccc(c1)OC)O)C</chem>                                                           |
| C4246 | PI | Noninhibitor | 175 | <chem>c1cc(cc1)/C(=C(/C)N1ccnc1)/OCCOc1ccc(cc1)Cl)Cl)Cl</chem>                                                                 |
| C4247 | PI | Noninhibitor | 175 | <chem>c1c2c(cc(c1)OCCN(CC)CC)OCCN(CC)CC)oc(=O)cc2C</chem>                                                                      |
| C4248 | PI | Noninhibitor | 175 | <chem>c1cc(cc1)/C(=N/OCc1ccc(cc1)Cl)Cl)/Cn1ccnc1)Cl)Cl</chem>                                                                  |
| C4249 | PI | Noninhibitor | 175 | <chem>c1c2c(cc3c1OCO3)n(cc(c2=O)C(=O)O)CC</chem>                                                                               |
| C4250 | PI | Noninhibitor | 175 | <chem>c1ccc(c(c1)OCC=C)OC[C@@H](CNC(C)C)O</chem>                                                                               |
| C4251 | PI | Noninhibitor | 175 | <chem>c1ccc(cc1)[C@H]([C@H](C)NCCC(=O)c1cccc(c1)OC)O</chem>                                                                    |
| C4252 | PI | Noninhibitor | 175 | <chem>c1ccc(cc1)OCCN1CCC(CC1)n1c2cccc2[nH]c1=O</chem>                                                                          |
| C4253 | PI | Noninhibitor | 175 | <chem>C(=O)(C[C@@H](C[N+](C)(C)C)OC(=O)CCCCCCCCCCCCCO</chem>                                                                   |
| C4254 | PI | Noninhibitor | 175 | <chem>c12c(cc(c(c1)OC)OC)c(Cc1ccc(c(c1)OC)OC)ncc2</chem>                                                                       |
| C4255 | PI | Noninhibitor | 175 | <chem>C#CCOC[C@H]1CO[C@@](c2ccc(cc2)Cl)(Cn2ccnc2)O1</chem>                                                                     |
| C4256 | PI | Noninhibitor | 175 | <chem>c1c2c(cc(c1F)N1CCN(CC1)C)n(cc(c2=O)C(=O)O)CC</chem>                                                                      |
| C4257 | PI | Noninhibitor | 175 | <chem>c1(c(c(c(c1)Cl)Cl)Cl)Cl)O</chem>                                                                                         |
| C4258 | PI | Noninhibitor | 175 | <chem>C1CCC(CC1)C(C[C@H]1CCCCN1)C1CCCC1</chem>                                                                                 |
| C4259 | PI | Noninhibitor | 175 | <chem>c1ccc(cc1)CCN</chem>                                                                                                     |
| C4260 | PI | Noninhibitor | 175 | <chem>c1ccc2c(c1)N(c1cccc1O2)C(=O)CC1</chem>                                                                                   |
| C4261 | PI | Noninhibitor | 175 | <chem>c1ccc(cc1)Cc1cccc1OCCN(C)C</chem>                                                                                        |
| C4262 | PI | Noninhibitor | 175 | <chem>c1cc(ccc1N1CCN(CCCN(C)C)CC1)NC(=O)C</chem>                                                                               |
| C4263 | PI | Inhibitor    | 175 | <chem>c12c3cccc1C1=C[C@@H](C(=O)N[C@@]4(C(=O)N5[C@H](C(=O)N6[C@@H](CCC6)[C@]5(O)O4)CC(C)C(C)C)CN([C@@H]1Cc2c([nH]3)Br)C</chem> |
| C4264 | PI | Noninhibitor | 175 | <chem>c1ccc(cc1)C1(c2cccc2)C(=O)O[C@H](CCN2CCCC2)O1</chem>                                                                     |
| C4265 | PI | Noninhibitor | 175 | <chem>c1cc(c(cc1[C@H](C(=O)O)C)Cl)N1CC=CC1</chem>                                                                              |
| C4266 | PI | Noninhibitor | 175 | <chem>c1ccc(cc1)C1(c2cccc2)CCC(CC1)NC(C)C</chem>                                                                               |
| C4267 | PI | Noninhibitor | 175 | <chem>c1ccc(cc1)C(c1cccc1)OCCN([C@H](C)COc1cccc1)C</chem>                                                                      |
| C4268 | PI | Noninhibitor | 175 | <chem>c12c(c(cc2)OC)N[C@@H](C)CCN)nccc1</chem>                                                                                 |
| C4269 | PI | Noninhibitor | 175 | <chem>c1ccc(c(c1)C)OC[C@H](CNCCn1cc(c(=O)[nH]c1=O)C)O</chem>                                                                   |
| C4270 | PI | Noninhibitor | 175 | <chem>c1cc(c(c(c1)Nc1cc(nc1)SCC(=O)O)Cl)C)C</chem>                                                                             |
| C4271 | PI | Noninhibitor | 175 | <chem>c1ccc(cc1)CCC(=O)c1cccc1OC[C@H](C[N+](CC)(CC)C)O</chem>                                                                  |
| C4272 | PI | Noninhibitor | 175 | <chem>c1ccc(cc1)CCC(=O)c1cccc1OC[C@H](C[N+](CCC)(C)C)O</chem>                                                                  |
| C4273 | PI | Inhibitor    | 175 | <chem>c1ccc(cc1)/C(=N\CC(C)C)/N1CCN(CCCCC)CC1</chem>                                                                           |
| C4274 | PI | Noninhibitor | 175 | <chem>c1ccc(cc1)CCC(=O)c1cccc1OC[C@@H](C[N+](C(C)C)(C(C)C)C)O</chem>                                                           |
| C4275 | PI | Noninhibitor | 175 | <chem>c1ccc(c(c1)C(=O)C)OC[C@H](CN1CCCC1)O</chem>                                                                              |
| C4276 | PI | Noninhibitor | 175 | <chem>c1cc(ccc1C(=O)C)OC[C@H](CN1CCCC1)O</chem>                                                                                |

|       |    |              |     |                                                                                                                                              |
|-------|----|--------------|-----|----------------------------------------------------------------------------------------------------------------------------------------------|
| C4277 | PI | Noninhibitor | 175 | c1ccc(c(c1)C(=O)CC)OC[C@@H](CN1CCOCC1)O                                                                                                      |
| C4278 | PI | Noninhibitor | 175 | c1cc(cc(c1[C@@]1(Cn2cncn2)OC[C@@H](CCC)O1)C1)C1                                                                                              |
| C4279 | PI | Noninhibitor | 175 | c1ccc(c(c1)OC(=O)NC)OC(C)C                                                                                                                   |
| C4280 | PI | Noninhibitor | 175 | c1cc2c(cc1C[C@H](C)NC[C@H](c1ccc(c(c1)O)O)O)OCO2                                                                                             |
| C4281 | PI | Noninhibitor | 175 | c12c(ncnc1N(C)C)n(en2)[C@H]1[C@@H]([C@@H]([C@@H](CO)O1)NC(=O)[C@H](Cc1ccc(cc1)OC)N)O                                                         |
| C4282 | PI | Noninhibitor | 175 | c1ccnc(c1)N(Cc1ccc(cc1)OC)CCN(C)C                                                                                                            |
| C4283 | PI | Inhibitor    | 175 | c1ccc(cc1)[C@H](c1ccc(cc1)Cl)N1CCN(Cc2ccc(cc2)C(C)(C)C)CC1                                                                                   |
| C4284 | PI | Noninhibitor | 175 | c12c(cc(c(c1)OC)OC)nc(nc2N)N1CCN(CC=C)CC1                                                                                                    |
| C4285 | PI | Noninhibitor | 175 | c12c([C@H](N[C@@H](N(CCO)CCO)O2)N(CC)CC)nc(nc1N(CC)CC)N(CCO)CCO                                                                              |
| C4286 | PI | Noninhibitor | 175 | c12c(c(nc(n2)N(CCO)CCO)N2CCOCC2)nc(nc1N1CCOCC1)N(CCO)CCO                                                                                     |
| C4287 | PI | Noninhibitor | 175 | c12c(c(nen2)N2CCOCC2)ncnc1N1CCOCC1                                                                                                           |
| C4288 | PI | Noninhibitor | 175 | c1ccc(cc1)[C@@H]1C(Nc2c(c(nc(n2)N2CCOCC2)N(CCO)CCO)O1)N1CCOCC1                                                                               |
| C4289 | PI | Noninhibitor | 175 | c12c(nc(en2)N2CCOCC2)nc(nc1N1CCOCC1)N1CCOCC1                                                                                                 |
| C4290 | PI | Noninhibitor | 175 | c12c(nc(c(n2)Cl)N(C)C)nc(nc1N(C)C)N1CCNCC1                                                                                                   |
| C4291 | PI | Noninhibitor | 175 | c12c(nc(c(n2)Cl)N2CCOCC2)nc(nc1N1CCOCC1)N1CCNCC1                                                                                             |
| C4292 | PI | Noninhibitor | 175 | c1cc(cc2c1C[C@@H]1[C@H]3CCCC[C@]23CCN1C)OC                                                                                                   |
| C4293 | PI | Noninhibitor | 175 | c12c(cc(c(c1)OC)[nH]c1c2CCN2[C@@H]1C[C@@H]1[C@H](C(=O)O)C([C@@H](C[C@@H]1C2)O)OC                                                             |
| C4294 | PI | Inhibitor    | 175 | c12c(cccc2)c(ccc1)C(=O)N(CCCC)CCN(CC)CC                                                                                                      |
| C4295 | PI | Noninhibitor | 175 | c1ccc(cc1)c1cc(=O)e2c(cc(c2o1)OC1[C@@H](C([C@@H](C(CO)O1)O)O)O)O                                                                             |
| C4296 | PI | Noninhibitor | 175 | c12c3c4c(c(c1O)C)O[C@@](C4=O)(C)O/C=C/[C@@H]([C@@H](C)[C@H](C)[C@H](C)[C@H](C)[C@H](C)[C@H](C)/C=C/C(C(=O)Nc(cc3OCC(=O)O)e2O)/C)O)OC(=O)C)OC |
| C4297 | PI | Noninhibitor | 175 | c12c3c4c(c(c1O)C)O[C@@](C4=O)(C)O/C=C/[C@@H]([C@@H](C)[C@H](C)[C@H](C)[C@H](C)[C@H](C)/C=C/C(C(=O)Nc(cc3O)e2O)/C)O)OC(=O)C)OC                |
| C4298 | PI | Noninhibitor | 175 | c1cc(cc(c1)OC)[C@@H](c1ccc(cc1)C(=O)N(CC)CC)N1[C@@H](C)CN([C@H](C)C1)CCC                                                                     |
| C4299 | PI | Noninhibitor | 175 | c1ccc(cc1)[C@@H](C(=O)OCCN1CCN(CCC(=O)e2ccc(cc2)OC)CC1)CC                                                                                    |
| C4300 | PI | Noninhibitor | 175 | c1ccc(cc1)CC(=O)OCCN1CCN(CC1)CCOC(=O)Cc1ccccc1                                                                                               |
| C4301 | PI | Noninhibitor | 175 | c1ccc(cc1)CCC(=O)OCCN1CCN(CC1)CCOC(=O)CCc1ccccc1                                                                                             |
| C4302 | PI | Noninhibitor | 175 | c1ccc(cc1)[C@H](C(=O)OCCN(CCCN(CCOCC(=O)[C@H](c1ccccc1)CC)C)C)CC                                                                             |
| C4303 | PI | Noninhibitor | 175 | c1ccc(cc1)[C@@H](C(=O)OCCN1CCN(CCCOC(=O)[C@@H](c2ccccc2)CC)CC1)CC                                                                            |
| C4304 | PI | Noninhibitor | 175 | c1ccc(cc1)NC(=O)c1ccccc1OCCN(CC)CC                                                                                                           |
| C4305 | PI | Inhibitor    | 175 | c1cnc(nc1)N1CCN(CCCCN2C(=O)CC3(CC2=O)CCCC3)CC1                                                                                               |
| C4306 | PI | Noninhibitor | 175 | c1ccc(cc1)[C@H](C(=O)OC1C[C@@H]2[C@@H]3[C@H]([C@H](C1)N2C)O3)CO                                                                              |
| C4307 | PI | Noninhibitor | 175 | C#CCN([C@H](C)Cc1ccccc1)C                                                                                                                    |
| C4308 | PI | Noninhibitor | 175 | C1=C[C@H](C)C(CC[C@H](C[C@H](CC(=O)O)O)[C@@H]2C1=CC(C)CC2OC(=O)C(C)(C)CC                                                                     |
| C4309 | PI | Noninhibitor | 175 | c1c(c(cc(c1F)F)F)[C@H](CC(=O)N1Cc2n(c(C(F)(F)F)nn2)CC1)N                                                                                     |
| C4310 | PI | Noninhibitor | 175 | c1ccc(cc1)C[C@@H](c1ccccc1)C(=O)OCCN(CC)CC                                                                                                   |
| C4311 | PI | Noninhibitor | 175 | C1=C([C@H]2CC[C@@]3([C@H]4CC[C@]5(C[C@H](CC[C@@]5(C=O)[C@H]4CC[C@]23C)O)O)COC1=O                                                             |
| C4312 | PI | Noninhibitor | 175 | c1cc(ccc1CS[C@@H](c1ccc(cc1)Cl)Cl)Cn1ccnc1Cl                                                                                                 |
| C4313 | PI | Noninhibitor | 175 | c1cc(cc(c1)Cl)Nc1c2c(c(C)nc2nc[nH]1)C                                                                                                        |
| C4314 | PI | Noninhibitor | 175 | c1cc(ccc1NC(=O)NC1CCCC1)OC[C@@H](CNC(C)(C)C)O                                                                                                |
| C4315 | PI | Noninhibitor | 175 | C(#CC(C)(C)C)/C=C/CN(Cc1c2c(ccc1)cccc2)C                                                                                                     |
| C4316 | PI | Inhibitor    | 175 | C1=C2CC[C@H]3[C@@H]4C[C@H](C)[C@H](C(=O)C)[C@]4(C)CC[C@H]3[C@]2(C)CCC1=O                                                                     |
| C4317 | PI | Noninhibitor | 175 | c1c2c(cc(c1OC)OC)[C@H]1CC(=O)[C@@H](CC(C)C)CN1CC2                                                                                            |
| C4318 | PI | Noninhibitor | 175 | c1cc(ccc1CN(c1ncccn1)CCN(C)C)OC                                                                                                              |
| C4319 | PI | Noninhibitor | 175 | c1c2c(ccc1Cl)sc(=O)n2CC(=O)N1CCN(CC1)CCO                                                                                                     |
| C4320 | PI | Noninhibitor | 175 | c1cc(cc2c1c1ccc(cc1C2=O)OCCN(CC)CC)OCCN(CC)CC                                                                                                |
| C4321 | PI | Noninhibitor | 175 | c1cc(cc(c1[C@@H](Cn1ccnc1)OCc1ccsc1Cl)Cl)Cl                                                                                                  |
| C4322 | PI | Noninhibitor | 175 | c1ccc(c(c1)C)OC[C@@H](CNCCO)c1ccc(cc1)C(=O)N)O                                                                                               |

|       |    |              |     |                                                                                                                                                      |
|-------|----|--------------|-----|------------------------------------------------------------------------------------------------------------------------------------------------------|
| C4323 | PI | Noninhibitor | 175 | c1c2e(cc(c1O)O)[C@@H](Cc1cc(c(c(c1)OC)OC)OC)NCCC2                                                                                                    |
| C4324 | PI | Noninhibitor | 175 | c1ccc(c(c1)C1=NCc2n(c3ccc(cc13)Cl)c(C)nn2)Cl                                                                                                         |
| C4325 | PI | Noninhibitor | 175 | C(=O)N[C@@H](C(Cl)(Cl)Cl)N1CCN(CC1)[C@H](C(Cl)(Cl)Cl)NC=O                                                                                            |
| C4326 | PI | Noninhibitor | 175 | c12e(c(c(c(c1)OC)OC)OC)ne(nc2N)N1CCN(C(=O)OCC(C)(C)O)CC1                                                                                             |
| C4327 | PI | Noninhibitor | 175 | c1c(cc(c(c1OC)OC)OC)C(=O)N1CCOCC1                                                                                                                    |
| C4328 | PI | Noninhibitor | 175 | c1cc(c(c(c1C(=O)OCC[N+](CC)(CC)CC)OC)OC)OC                                                                                                           |
| C4329 | PI | Noninhibitor | 175 | c1cc(cc(c1[C@@@]1(Cn2ccnc2)OC[C@H](CS2ccc(cc2)NC(=O)OCC)O1)Cl)Cl                                                                                     |
| C4330 | PI | Noninhibitor | 175 | c1ccc(cc1)CC(=O)N([C@H]1CC[C@]2(CCCO2)C[C@@H]1N1CCCC1)C                                                                                              |
| C4331 | PI | Noninhibitor | 175 | c1ccc(cc1)C1=C(c2ccc(cc2)OCCN(CC)CC)c2ccc(cc2C1)OC                                                                                                   |
| C4332 | PI | Noninhibitor | 175 | c1ccc(cc1)C(=C1CCN(CC1)CCOCCOCC(=O)O)c1ccccc1                                                                                                        |
| C4333 | PI | Noninhibitor | 175 | c1ccc(c(c1)N1CCN(CCCNc2cc(=O)n(c(=O)n2C)C)CC1)OC                                                                                                     |
| C4334 | PI | Noninhibitor | 175 | c1ccc2cc1[C@H](C(=O)N)C@@H(C(C(=O)N)C@@H(C3ccc(cc23)O)C(=O)O)[C@H](c2ccc(cc12)C)O)c2ccc(cc2)C[C@@H](C@@H)(C@@H)(C@@H)C(=O)N[C@@H](C(=O)N)C(=O)O      |
| C4335 | PI | Noninhibitor | 175 | c1c(cc(cc1Cl)Cl)N1C(=O)[C@](C=C)(C)OC1=O                                                                                                             |
| C4336 | PI | Noninhibitor | 175 | c12c(cccc1)[nH]c1e2CCN2C[C@H](C[C@]1(c1cc3c(cc1OC)N(C=O)[C@@H]1[C@@@]43CCN3[C@H]4[C@](C=CC3)(CC)[C@H]([C@@]1(C(=O)OC)OC(=O)C)C(=O)OC)C[C@@](CC)(C2)O |
| C4337 | PI | Noninhibitor | 175 | C(=C\C=C\COC(=O)CCCCCCCCCCCCC)C)/C=C/C=C/C1=C(C)CCCC1(C)C)\C                                                                                         |
| C4338 | PI | Noninhibitor | 175 | c12c(ccc(c2)S(=O)(=O)NCCCCN)c(ccc1)Cl                                                                                                                |
| C4339 | PI | Noninhibitor | 175 | c12c(cccc2S(=O)(=O)NCCCCCN)c(ccc1)Cl                                                                                                                 |
| C4340 | PI | Noninhibitor | 175 | c1ccc(cc1)c1ccc(cc1)CC[C@H](C)CC(=O)OCCN(C)C                                                                                                         |
| C4341 | PI | Noninhibitor | 175 | c1ccc(cc1)[C@@H](c1c(c2ccccc2oc1=O)O)CC(=O)C                                                                                                         |
| C4342 | PI | Noninhibitor | 175 | c1cc(cnc1)/C(=C\CN(C)C)/c1ccc(cc1)Br                                                                                                                 |
| C4343 | PI | Noninhibitor | 175 | c12c(ccc(c1)C[C@H]1COC(=O)N1)[nH]cc2CCN(C)C                                                                                                          |
| C4344 | PI | Noninhibitor | 175 | c1ccc(c(c1)N1CCN(Cc2c(c3ccc(cc3)F)[nH]c(=O)O)CC1)OC                                                                                                  |
| C4345 | PI | Noninhibitor | 175 | c1cc(ccc1[N+](=O)[O-])OC(=O)N(C)C                                                                                                                    |
| C4346 | PI | Noninhibitor | 175 | c12e3c(ccc1)c(=O)n(c(=O)c3cc(c2)[N+](=O)[O-])CCN1CCCC1                                                                                               |
| C4347 | PI | Noninhibitor | 175 | c1ccc(cc1)n1c(=O)cc(C)n1C                                                                                                                            |
| C4348 | PI | Noninhibitor | 175 | c1ccc(cc1)Cl(c2ccccc2)C(=O)NC(=O)N1                                                                                                                  |
| C4349 | PI | Noninhibitor | 175 | c1ccc(cc1)C1=NCC(=O)Nc2ccc(cc12)[N+](=O)[O-]                                                                                                         |
| C4350 | PI | Noninhibitor | 175 | c1ccc2e(c1)c(=O)[nH]c1cccnc1n2C(=O)CN1CCN(CC1)C                                                                                                      |
| C4351 | PI | Noninhibitor | 175 | c12cnc(nc1n(cc(c2=O)C(=O)O)CC)N1CCCC1                                                                                                                |
| C4352 | PI | Noninhibitor | 175 | c12cnc(nc1n(cc(c2=O)C(=O)O)CC)N1CCNCC1                                                                                                               |
| C4353 | PI | Noninhibitor | 175 | c12c(cccc1)[nH]cc2C[C@@H](C(=O)O)N                                                                                                                   |
| C4354 | PI | Inhibitor    | 175 | c12c(cccc2OC[C@@H](CN2CCN(C3c4ccccc4CCc4cccc34)CC2)O)ncccc1                                                                                          |
| C4355 | PI | Noninhibitor | 175 | c1cc(/C=C/C(=O)O)nc(c1)/C(=C/CN1CCCC1)/c1ccc(cc1)C                                                                                                   |
| C4356 | PI | Noninhibitor | 175 | CCCCCCCCCCCCCCC[C@@H]([C@H](CO)N)O                                                                                                                   |
| C4357 | PI | Noninhibitor | 175 | [C@H]([C@@H]([C@@H](CO)O)O)O([C@H](CO)O)O                                                                                                            |
| C4358 | PI | Noninhibitor | 175 | c1ccc(cc1)C(c1ccccc1)(C1CCN(CCC[C@H](c2ccc(cc2)C(C(=O)O)(C)C)O)CC1)O                                                                                 |
| C4359 | PI | Noninhibitor | 175 | C(=O)(C[C@@H](C[N+](C)(C)O)O                                                                                                                         |
| C4360 | PI | Noninhibitor | 175 | c1ccc(cc1)N1CCN(C[C@@H](CO)O)CC1                                                                                                                     |
| C4361 | PI | Noninhibitor | 175 | c1ccc(cc1)CCc1ccc(cc1)[C@H](Cn1ccnc1)O                                                                                                               |
| C4362 | PI | Noninhibitor | 175 | c1cc(ccc1[C@H](C1(CCCCC1)O)CN(C)C)O                                                                                                                  |
| C4363 | PI | Noninhibitor | 175 | c1cc2c(c(c1)O)C(=O)C1=C([C@@]3(C(=O)C(=C([C@H]([C@@H]3C[C@H]1[C@@]2(C)O)N(C)C)O)C(=O)NCN1CCCC1)O)O                                                   |
| C4364 | PI | Noninhibitor | 175 | C1=C2C[C@H](CC[C@]2(C)[C@@H]2CC[C@]3(C)[C@@H](CC[C@@]3(C(=O)C)O)[C@@H]2C1)O                                                                          |
| C4365 | PI | Inhibitor    | 175 | c1ccc2e(c1)C(=CCCN[C@@H](C)Cc1ccc(c(c1)OC)OC)c1ccccc1CC2                                                                                             |
| C4366 | PI | Noninhibitor | 175 | c12c(c(nc(n2)N(CCO)CCO)N2CCCC[C@H](C2)O)nc(nc1N1CCC[C@H](C1)O)N(CCO)CCO                                                                              |
| C4367 | PI | Noninhibitor | 175 | c1cc(cc2c1[C@@@]1CC[C@@]3(C)[C@@H](CC[C@@H]3O)[C@H]1CC2)O                                                                                            |
| C4368 | PI | Noninhibitor | 175 | C1=C2[C@@H]3CC(C)(C)CC[C@]3(C(=O)O)CC[C@@]2(C)[C@]2(C)CC[C@H]3[C@](C)(CC[C@@H](C3(C)C)O)[C@H]2C1                                                     |



|       |    |              |     |                                                                                                                                    |
|-------|----|--------------|-----|------------------------------------------------------------------------------------------------------------------------------------|
| C4369 | PI | Noninhibitor | 175 | c1ccc(cc1)C[C@H]1[C@H]2[C@@H](C(=C)[C@H]([C@H]3/C=C/C[C@H](C)C[C@@@]/C=C/[C@H]([C@]23C(=O)N1)O)(C)O)O)C                            |
| C4370 | PI | Noninhibitor | 175 | c1cc(cc2c1[C@@H]1CC[C@@]3(C)[C@@H](C[C@H](C3O)O)[C@H]1CC2)O                                                                        |
| C4371 | PI | Noninhibitor | 175 | C1=C(C(=O)[C@@]2(CC(=C[C@@H]3[C@@H]4C(C)(C)[C@@]4([C@@H]([C@@H](C)[C@]3([C@H]12)O)O)O)CO)O)C                                       |
| C4372 | PI | Noninhibitor | 175 | C1=C(C(=O)[C@@]2(CC(=C[C@@H]3[C@@H]4C(C)(C)[C@@]4([C@@H]([C@@H](C)[C@]3([C@H]12)O)O)O)OC(=O)C)CO)O)C                               |
| C4373 | PI | Noninhibitor | 175 | C1=C(C(=O)[C@@]2(CC(=C[C@@H]3[C@@H]4C(C)(C)[C@@]4([C@@H]([C@@H](C)[C@]3([C@H]12)O)O)O)OC(=O)CCC)CO)O)C                             |
| C4374 | PI | Inhibitor    | 175 | c12c(cccc2O[C@H](CN2CCN(C(=O)C(Cc3ccccc3)Cc3ccccc3)CC2)O)nc1                                                                       |
| C4375 | PI | Noninhibitor | 175 | c1ccc2c(c1)C(=C1CCN(CC1)C)c1ccccc1C2O                                                                                              |
| C4376 | PI | Noninhibitor | 175 | C(=C(C)C)CC1=C([C@]2(C(=O)[C@](C1=O)(CC=C(C)C)C[C@H](CC=C(C)C)[C@@]2(C)CCC=C(C)C)CC(C)C)O                                          |
| C4377 | PI | Noninhibitor | 175 | c12c3ccccc1C1=C[C@@H](C(=O)N[C@@H](C)CO)CN([C@H]1Cc2c[nH]3)C                                                                       |
| C4378 | PI | Noninhibitor | 175 | c12c3ccccc1C1=C[C@@H](C(=O)N[C@@H](CC)CO)CN([C@@H]1Cc2cn3C)C                                                                       |
| C4379 | PI | Noninhibitor | 175 | c12c(c(nc(n2)N(CCO)C)N2CCCC2)nc(nc1N1CCCC1)N(CCO)C                                                                                 |
| C4380 | PI | Noninhibitor | 175 | c12c(c(nc(n2)N(CCO)CCO)N)nc(nc1N)N(CCO)CCO                                                                                         |
| C4381 | PI | Noninhibitor | 175 | c12c(c(nc(n2)N(CCO)CCO)N2CC=CCC2)nc(nc1N1CC=CCC1)N(CCO)CCO                                                                         |
| C4382 | PI | Noninhibitor | 175 | c12c(c(nc(n2)N2CC[N+](CC2)(C)C)N2CCCC2)nc(nc1N1CCCC1)N(CCO)CCO                                                                     |
| C4383 | PI | Noninhibitor | 175 | c12c(c(nc(n2)N(CCO)CCO)N2CCCC2)nc(nc1N)N(CCO)CCO                                                                                   |
| C4384 | PI | Noninhibitor | 175 | c12c(c(nc(n2)N(CCO)CCO)N(CCO)CCO)nc(nc1N(CCO)CCO)N(CCO)CCO                                                                         |
| C4385 | PI | Noninhibitor | 175 | c1ccc2c(c1)C=Cc1ccccc1N2CCCN1CCN(CC1)CCO                                                                                           |
| C4386 | PI | Noninhibitor | 175 | c12c(c(nc(n2)NCCO)N2CCCC2)nc(nc1N1CCCC1)NCCO                                                                                       |
| C4387 | PI | Noninhibitor | 175 | C(=C(C)C)CC/C(=C/CC/C(=C/CC/C(=C/CC/C(=C/CC/C(=C/CC/C(=C/CC/C(=C/CC/C(=C/CO)/C)/C)/C)/C)/C)/C                                      |
| C4388 | PI | Noninhibitor | 175 | c1ccc(cc1)[C@](CCN1CCCC1)(C1CCCC1)O                                                                                                |
| C4389 | PI | Noninhibitor | 175 | c1ccc(cc1)[C@@](CCN1CCCC1)([C@@H]1C[C@H]2C=C[C@@H]1C2)O                                                                            |
| C4390 | PI | Noninhibitor | 175 | c1ccc2c(c1)c(=O)n1c(/C(=C)c3ccc(c3)O)/OCC1)n2                                                                                      |
| C4391 | PI | Noninhibitor | 175 | c1ccc(cc1)c1ccccc1O)C(=O)OCCN(CC)CC                                                                                                |
| C4392 | PI | Noninhibitor | 175 | c1cc2c3e(c1)CCN([C@@H]3Cc1ccc(c21)O)O)C                                                                                            |
| C4393 | PI | Noninhibitor | 175 | c1cc(c2c(c1NCCNCCO)C(=O)c1c(c(cc1O)O)C2=O)NCCNCCO                                                                                  |
| C4394 | PI | Noninhibitor | 175 | c1cc(ccc1C[C@H](C)NC[C@@H](c1cc(cc1)O)O)O                                                                                          |
| C4395 | PI | Inhibitor    | 175 | c12c3c4c(c5c1c(c(cc2OC)O)C(=O)C(=C5C[C@@H](C)OC(=O)c1ccccc1)OC)C(=C(C(=O)c4c(cc3OC)O)OC)C[C@@H](C)OC(=O)Oe1ccc(cc1)O               |
| C4396 | PI | Noninhibitor | 175 | c1ccc(cc1)CN1[C@H](c2nc3ccccc3c(=O)n2[C@H]1c1ccccc1)O)C                                                                            |
| C4397 | PI | Noninhibitor | 175 | c1cc(c(cc1[C@H](CNC)O)O)O                                                                                                          |
| C4398 | PI | Noninhibitor | 175 | c1cc(c(cc1[C@H](CNCCCCCN[C@@H](c1ccc(c(c1)O)O)O)O)O)O                                                                              |
| C4399 | PI | Noninhibitor | 175 | c1cc(c(cc1C[C@@H]1c2cc(c(cc2CCN1C)O)O)O)O                                                                                          |
| C4400 | PI | Noninhibitor | 175 | c1cc(c(cc1C[C@@H]1c2cc(c(cc2CCN1)O)O)O)O                                                                                           |
| C4401 | PI | Noninhibitor | 175 | c1cc(ccc1CC[C@H](C)NCCc1ccc(c(c1)O)O)O                                                                                             |
| C4402 | PI | Noninhibitor | 175 | c1cc(cc(c1)NC(=O)C(=O)N/N=C/c1ccc(c(c1)O)O)[N+](=O)[O-]                                                                            |
| C4403 | PI | Noninhibitor | 175 | c1cc(cc2c1[C@@H]1C(=CC2)[C@H]2CCC(=O)[C@]2(C)CC1)O                                                                                 |
| C4404 | PI | Noninhibitor | 175 | c1cc(cc2c1[C@@H]1CC[C@@]3(C(=O)CC[C@H]3[C@@H]1CC2)C)O                                                                              |
| C4405 | PI | Inhibitor    | 175 | c1ccnc(c1)[C@@H](c1ccc(cc1)Cl)OCCN(C)C                                                                                             |
| C4406 | PI | Noninhibitor | 175 | c12c(ccc(c2)O)c2c(cc1)[C@H]1CCC(=O)[C@@]1(C)CC2                                                                                    |
| C4407 | PI | Noninhibitor | 175 | c1c2c(cc(c1O)O)[C@@H](C)NCC2                                                                                                       |
| C4408 | PI | Noninhibitor | 175 | c1ccc(cc1)CC[C@H](C)N[C@@H](C)[C@H](c1ccc(cc1)O)O                                                                                  |
| C4409 | PI | Noninhibitor | 175 | c1cc(ccc1CCN[C@@H](C)[C@@H](c1ccc(cc1)O)O)O                                                                                        |
| C4410 | PI | Noninhibitor | 175 | c1ccc(cc1)C[C@H](C(=O)N[C@@H](C(=O)N[C@@H](C(=O)N[C@@H](C(=O)NCC(=O)N)C(C)C)C)C)CCC(=O)O)NC(=O)[C@@H](C)NC(=O)[C@H](Cc1ccc(cc1)O)N |
| C4411 | PI | Noninhibitor | 175 | c1cc(c(cc1[C@H](CNC(C)C)C)O)CO)O                                                                                                   |
| C4412 | PI | Noninhibitor | 175 | C(=C(C)/OP(=O)(OC)OC)C(=O)OC                                                                                                       |
| C4413 | PI | Noninhibitor | 175 | c1cc(cc(c1)[N+](=O)[O-])[C@@H]1C(=C(C)NC(=C1P1(=O)OCC(C)(C)CO1)C)C(=O)OCCCCCCCCC                                                   |
| C4414 | PI | Inhibitor    | 175 | C1=C2CC[C@H]3[C@@H]4CC[C@](C(=O)C)([C@@]4(C)CC[C@@H]3[C@@]2(C)CCC1=O)O                                                             |



|       |    |              |     |                                                                                               |
|-------|----|--------------|-----|-----------------------------------------------------------------------------------------------|
| C4461 | PI | Noninhibitor | 175 | c1ccc(c(c1)C)N1CCN(Cc2n3c(CCCC3)nn2)CC1                                                       |
| C4462 | PI | Inhibitor    | 175 | c1ccc2c(c1)N(c1cc(ccc1S2)Cl)C(=O)CCN(CC)CC                                                    |
| C4463 | PI | Noninhibitor | 175 | c12c(nc(c3ccccc3)n2)N)nc(nc1N)N                                                               |
| C4464 | PI | Noninhibitor | 175 | c12e(c(nc(n2)N(C)C)N2CCCCC2)nc(nc1N1CCCCC1)N(C)C                                              |
| C4465 | PI | Noninhibitor | 175 | c12e(c(nc(n2)N2CCCCC2)N2CCCCC2)nc(nc1N1CCCCC1)N1CCCCC1                                        |
| C4466 | PI | Noninhibitor | 175 | c12c(cccc1)c(c1ccccc1)nc(c2)N1CCNCC1                                                          |
| C4467 | PI | Noninhibitor | 175 | c12c(cccc1)nc1c(c2N)CCCC1                                                                     |
| C4468 | PI | Noninhibitor | 175 | c12e(cccc2)nc2c(c1)cccc2                                                                      |
| C4469 | PI | Noninhibitor | 175 | c12c(cccc1)nc(cc2)N1CCNCC1                                                                    |
| C4470 | PI | Noninhibitor | 175 | c12c(cccc1)nc1c(c2N)CCN1C1CCCC1                                                               |
| C4471 | PI | Noninhibitor | 175 | c1ccc(cc1)[C@H](c1cccn1)CCN(C)C                                                               |
| C4472 | PI | Noninhibitor | 175 | c1ccc(cc1)Cc1cccn1                                                                            |
| C4473 | PI | Inhibitor    | 175 | c1ccc(cc1)[C@H](c1ccccc1Cl)OCCN1CCN(Cc2ccccc2C)CC1                                            |
| C4474 | PI | Noninhibitor | 175 | c1ccc(cc1)CN(c1cccn1)CCN(C)C                                                                  |
| C4475 | PI | Noninhibitor | 175 | c1ccc(cc1)Cn1ccn1                                                                             |
| C4476 | PI | Noninhibitor | 175 | c12c(cccc1)oc(c2)C(=O)N1CCN(Cc2ccccc2)CC1                                                     |
| C4477 | PI | Noninhibitor | 175 | c12c(cccc1)oc(c2CC)[C@H](CNCCC)O                                                              |
| C4478 | PI | Noninhibitor | 175 | c1ccc(cc1)[C@H](c1nc(CCN(CC)CC)on1)CC                                                         |
| C4479 | PI | Noninhibitor | 175 | c1ccc(cc1)c1nc(NCCN(CCCC)CCCC)on1                                                             |
| C4480 | PI | Noninhibitor | 175 | c12c(cc(cc1)O)sc(c2C(=O)c1ccc(cc1)OCCN1CCCCC1)c1ccc(cc1)O                                     |
| C4481 | PI | Noninhibitor | 175 | c1ccnc(c1)N(Cc1ccsc1)CCN(C)C                                                                  |
| C4482 | PI | Noninhibitor | 175 | c1cc[n+](cc1)CC1=C(C(=O)O)N2C(=O)[C@H]([C@@H]2SC1)NC(=O)/C(=N)OC(C(=O)O)(C)C/c1esc(n1)N       |
| C4483 | PI | Inhibitor    | 175 | c1ccc2c(c1)N(c1cc(ccc1S2)Cl)CCCN(CC)CC                                                        |
| C4484 | PI | Noninhibitor | 175 | c1cc(C2C(=C(C)NC(=C2C(=O)OCC(=O)O)C)C(=O)OCC(=O)O)sc1                                         |
| C4485 | PI | Noninhibitor | 175 | c1ccc(cc1)N(C1CCN(CC1)C)Cc1cccs1                                                              |
| C4486 | PI | Noninhibitor | 175 | c1ccc(cc1)N(Cc1cccs1)CCN(C)C                                                                  |
| C4487 | PI | Noninhibitor | 175 | c1cc(ccc1CN(c1nccs1)CCN(C)C)OC                                                                |
| C4488 | PI | Inhibitor    | 175 | c1ccc2c(c1)/C(=C)CCN(C)C/c1cc(ccc1S2)Cl                                                       |
| C4489 | PI | Inhibitor    | 175 | c1ccc2c(c1)N(c1cc(ccc1S2)Cl)CCN                                                               |
| C4490 | PI | Inhibitor    | 175 | c1cc(c2c(c1C(=O)C)OCCO2)OC[C@@H](CN1CCN(C(=O)/C=C/c2cc(c(c2)OC)OC)OC)CC1)O                    |
| C4491 | PI | Inhibitor    | 175 | c1ccc(cc1)/C=C/CN1CCN(C(c2ccccc2)c2ccccc2)CC1                                                 |
| C4492 | PI | Inhibitor    | 175 | c12c(cccc1)n(c(CN1CCN(C/C=C/c3ccccc3)CC1)n2)CCC(=O)c1ccccc1                                   |
| C4493 | PI | Inhibitor    | 175 | c12c(cccc1)nc(c2)N1CCN(CCCC(=O)c2ccc(cc2)F)CC1                                                |
| C4494 | PI | Inhibitor    | 175 | c1ccc(cc1)[C@@](c1ccc(cc1)Cl)(C)OCC[C@H]1CCCN1C                                               |
| C4495 | PI | Inhibitor    | 175 | c12c(cccc1)n(c(CN1CCCC1)n2)Cc1ccc(cc1)Cl                                                      |
| C4496 | PI | Inhibitor    | 175 | c1ccc(cc1)/C=C/CN1CCN([C@@H](c2ccccc2)c2ccc(cc2)Cl)CC1                                        |
| C4497 | PI | Inhibitor    | 175 | c1ccc2c(c1)CCc1ccc(cc1N2CCCN(C)C)Cl                                                           |
| C4498 | PI | Inhibitor    | 175 | c1ccc2c(c1)/C(=C)CCN1CCN(CC1)CCO/c1cc(ccc1S2)Cl                                               |
| C4499 | PI | Inhibitor    | 175 | c1ccc(cc1)[C@H](c1ccc(cc1)Cl)OCCN1CCCCC1                                                      |
| C4500 | PI | Inhibitor    | 175 | c1ccc2c(c1)N(c1cc(ccc1S2)Cl)CCCN                                                              |
| C4501 | PI | Inhibitor    | 175 | c1cc(ccc1C(c1ccc(cc1)F)CCCN1CCC(CC1)n1c2ccc(cc2[nH]c1=O)Cl)F                                  |
| C4502 | PI | Inhibitor    | 175 | c1ccc2c(c1)C(=C1CCN(CC1)C)c1cc(ccc1O2)Cl                                                      |
| C4503 | PI | Inhibitor    | 175 | c1ccc2c(c1)N=C(c1cc(ccc1S2)Cl)N1CCN(CC1)C                                                     |
| C4504 | PI | Inhibitor    | 175 | c1ccc2c(c1)/C(=C)CCN1CCN(CCC(=O)NC)CC1/c1cc(ccc1S2)Cl                                         |
| C4505 | PI | Inhibitor    | 175 | C=C[C@@@]1(C)CC(=O)[C@]2([C@]3(C)[C@H](C(C)C)CC[C@@@H]3O)[C@@H]([C@@H]([C@]2(C)O1)OC(=O)C)O)O |
| C4506 | PI | Inhibitor    | 175 | c1cc(cc2c1c(c(=O)o2)Cl)C)OP(=S)(OCC)OCC                                                       |







|       |    |           |     |                                                                                                                                                    |
|-------|----|-----------|-----|----------------------------------------------------------------------------------------------------------------------------------------------------|
| C4645 | PI | Inhibitor | 175 | <chem>C=C1[C@@H]([C@H]2[C@@H](C(=O)[C@@H](/C=C/C(C)C)[C@@H]([C@H]([C@H]1OC(=O)C(C)C)OC(=O)C)OC(=O)C)C[C@](C)([C@@H]2OC(=O)C)OC(=O)C)OC(=O)C</chem> |
| C4646 | PI | Inhibitor | 175 | <chem>C(#N)[C@@](c1ccc(c1)Cl)Cl)(CCCN(Cc1ccc(c1)OC)OC)C(C)C</chem>                                                                                 |
| C4647 | PI | Inhibitor | 175 | <chem>C(#N)[C@@](c1ccc(c1)OC)OC)(CCCN(Cc1ccc(c1)Cl)Cl)C(C)C</chem>                                                                                 |
| C4648 | PI | Inhibitor | 175 | <chem>c1ccc(cc1)c1cc(=O)c2ccc(c2[nH]1)C(=O)Nc1ccc(cc1)OCCN(Cc1ccc(c1)OC)OC)C</chem>                                                                |
| C4649 | PI | Inhibitor | 175 | <chem>C(#N)[C@@](c1cc(c(c1)OC)OC)OC)(CCCN(Cc1cc(c(c1)OC)OC)OC)C(C)C</chem>                                                                         |
| C4650 | PI | Inhibitor | 175 | <chem>C(#N)[C@@](c1ccc(c1OC)OC)OC)(CCCN(Cc1ccc(c1)OC)OC)C(C)C</chem>                                                                               |
| C4651 | PI | Inhibitor | 175 | <chem>C(#N)[C@](c1ccc(c1OC)OC)OC)(CCCN(Cc1ccc(c1)OC)OC)C(C)C</chem>                                                                                |
| C4652 | PI | Inhibitor | 175 | <chem>C(#N)[C@@](c1ccc(c1OC)OC)OC)(CCCN(Cc1ccc(c1)OC)OC)C(C)C</chem>                                                                               |
| C4653 | PI | Inhibitor | 175 | <chem>C(#N)[C@@](c1ccc(c1OC)OC)OC)(CCCN(Cc1ccc(c1)OC)OC)C(C)C</chem>                                                                               |
| C4654 | PI | Inhibitor | 175 | <chem>c12c(ccc2OC[C@@H](CN2CCN(C3c4cccc4[C@H]4C[C@H]4c4cccc34)CC2)O)nccc1</chem>                                                                   |
| C4655 | PI | Inhibitor | 175 | <chem>c1cc(c1c1C[C@H]1c2cc(c2c2CCN1C)OC)OC)OC</chem>                                                                                               |
| C4656 | PI | Inhibitor | 175 | <chem>c1cc(ccc1C(=O)CCCN1CCC(C(=O)c2ccc(cc2)F)CC1)F</chem>                                                                                         |
| C4657 | PI | Inhibitor | 175 | <chem>c1cc(ccc1CN1C(=O)NC(=S)N(Cc2ccc(cc2)Cl)CC1)Cl</chem>                                                                                         |
| C4658 | PI | Inhibitor | 175 | <chem>c12c(ccc1)nc1c(ccc1C(=O)Nc1ccc(cc1)OCCN(Cc1ccc(c1)OC)OC)C)n2</chem>                                                                          |
| C4659 | PI | Inhibitor | 175 | <chem>c1cc(c(c1)C)NC(=O)CN1CCN(Cc1ccc(cc2)F)c2ccc(cc2)F)CC1)C</chem>                                                                               |
| C4660 | PI | Inhibitor | 175 | <chem>c1ccc(cc1)[C@@H](c1ccc(cc1)Cl)OCCN1CCOCC1</chem>                                                                                             |
| C4661 | PI | Inhibitor | 175 | <chem>c1ccc(cc1)CC(=O)N(c1ccc(cc1)Cl)C1CCN(C(C)C)CC1</chem>                                                                                        |
| C4662 | PI | Inhibitor | 175 | <chem>c1ccc(cc1)C1(c2ccccc2)C(=O)N(CCCN2CCN(c3ccccc3)Cl)CC2)[C@H](C)N1</chem>                                                                      |
| C4663 | PI | Inhibitor | 175 | <chem>c1ccc(cc1)C1CCN(CC1)CCCN1C(=O)C(c2ccccc2)(c2ccccc2)N[C@H]1C</chem>                                                                           |
| C4664 | PI | Inhibitor | 175 | <chem>c1ccc2c(c1)c(=O)n1cccc(c1n2)C(=O)Nc1ccc(cc1)OCCN(Cc1ccc(c1)OC)OC)C</chem>                                                                    |
| C4665 | PI | Inhibitor | 175 | <chem>c1ccc(cc1)C1(c2ccccc2)C(=O)N(C(=O)N1)CCCN1CCOCC1</chem>                                                                                      |
| C4666 | PI | Inhibitor | 175 | <chem>c1ccc(cc1)C1CCN(CC1)CCCN1C(=O)C(c2ccccc2)(c2ccccc2)NC1=O</chem>                                                                              |
| C4667 | PI | Inhibitor | 175 | <chem>c1ccc(cc1)C1(c2ccccc2)C(=O)N(C(=O)N1)CCC(=O)N</chem>                                                                                         |
| C4668 | PI | Inhibitor | 175 | <chem>c1ccc(cc1)/C=C/c1ccc(cc1)C(C)(C)C/c1ccc(cc1)OCCN(CC)CC</chem>                                                                                |
| C4669 | PI | Inhibitor | 175 | <chem>c1ccc(cc1)[C@H](c1ccc(cc1)OCCN(CC)CC)Cc1ccc(cc1)OC</chem>                                                                                    |
| C4670 | PI | Inhibitor | 175 | <chem>C(#N)[C@](c1ccc(c1)OC)OC)(CCCNc1c2c(cc3c1ccccc3)ccccc2)C(C)C</chem>                                                                          |
| C4671 | PI | Inhibitor | 175 | <chem>C1=C[C@@H](C)[C@@H](/C=C/[C@@H](C)[C@@H]([C@@H](C)[C@H](C)C(C2=CC(=O)C=C(C2=O)NC(=O)/C(=C1)/C)OC)OC)O)/C)OC(=O)N</chem>                      |
| C4672 | PI | Inhibitor | 175 | <chem>c1ccc(cc1)C(c1ccccc1)N1CCN(CC1)CCOC(=O)C1=C(C)NC(=C(C(=O)OC)[C@@H]1c1ccccc1)[N+](=O)[O-]C</chem>                                             |
| C4673 | PI | Inhibitor | 175 | <chem>c1ccc2c(c1)C1c3ccccc3C2(CC1)CCCNc</chem>                                                                                                     |
| C4674 | PI | Inhibitor | 175 | <chem>c1ccc2c(c1)c(=O)c1ccc(c1[nH]2)C(=O)Nc1ccc(cc1)OCCN(Cc1ccc(cc1)C)C</chem>                                                                     |
| C4675 | PI | Inhibitor | 175 | <chem>c1cc(c1c1C(=O)OCCCN([C@@H](C)Cc1ccc(cc1)OC)CC)OC)OC</chem>                                                                                   |
| C4676 | PI | Inhibitor | 175 | <chem>c1ccc(cc1)[C@@H](c1ccc(cc1)Cl)N1CCN(Cc2ccccc2)C)CC1</chem>                                                                                   |
| C4677 | PI | Inhibitor | 175 | <chem>C1=C2C(C)C[C@H]3[C@H]4CC[C@](C(=O)C)([C@]4(C)CC[C@H]3[C@@]2(C)CCC1=O)O</chem>                                                                |
| C4678 | PI | Inhibitor | 175 | <chem>C1=C2C(=C[C@@H]3[C@H]4CC[C@](C(=O)C)([C@@]4(C)CC[C@H]3[C@@]2(C)CCC1=O)OC(=O)C)C</chem>                                                       |
| C4679 | PI | Inhibitor | 175 | <chem>c1ccc(cc1)C(c1ccccc1)CCNCCCOC(=O)c1cc(c(c1)OC)OC)OC</chem>                                                                                   |
| C4680 | PI | Inhibitor | 175 | <chem>c12c3ccccc1[C@@H]1C[C@@H](CNC(=O)OCc4ccccc4)CN([C@H]1Cc2cn3C)C</chem>                                                                        |
| C4681 | PI | Inhibitor | 175 | <chem>c1ccc(cc1)C(c1ccccc1)(C(=O)CC)C[C@H](C)N(C)C</chem>                                                                                          |
| C4682 | PI | Inhibitor | 175 | <chem>c1ccc(cc1)CN(CC)CCOc1ccc(cc1)NC(=O)c1ccc2c1[nH]c1ccccc1c2=O</chem>                                                                           |
| C4683 | PI | Inhibitor | 175 | <chem>c1cc2c(cc1)/C=C/[C@H]1CC(=CC(=O)O1)OC)OCO2</chem>                                                                                            |
| C4684 | PI | Inhibitor | 175 | <chem>c1ccc2c(c1)N(c1cc(ccc1S2)Cl)CCCN1CCN(CC1)CCOC(=O)c1cc(c(c1)OC)OC)OC</chem>                                                                   |
| C4685 | PI | Inhibitor | 175 | <chem>c12c(cc1)OC[nH]c1c2CCN2[C@@H]1C[C@H]1[C@H](C(=O)OC)[C@H](C(C[C@@H]1C2)OC)OC</chem>                                                           |
| C4686 | PI | Inhibitor | 175 | <chem>c1ccc2c(c1)C=C(c1cc(ccc1O2)OC)N1CCN(CC1)C</chem>                                                                                             |
| C4687 | PI | Inhibitor | 175 | <chem>c12c(ccc1)nc(CCCN(CC[C@@H]1[C@H](c3ccc(cc3CC1OC(=O)COC)F)C(C)C)[nH]2</chem>                                                                  |
| C4688 | PI | Inhibitor | 175 | <chem>C(#C[C@]1(CC[C@H]2[C@H]3C(=C4C(=CC(=O)CC4)CC3)[C@@H](c3ccc(cc3)N(C)C)C[C@]12C)O)C</chem>                                                     |
| C4689 | PI | Inhibitor | 175 | <chem>c1cc(ccc1C(=O)C1CCN(CC1)CCCN1c2ccc(cc2[nH]c1=O)Cl)F</chem>                                                                                   |
| C4690 | PI | Inhibitor | 175 | <chem>c12c(cc(c1)OC)OC)[nH]c(c2CCN1CCN(c2ccccc2OC)CC1)C</chem>                                                                                     |

|       |    |           |     |                                                                                                                                                                   |
|-------|----|-----------|-----|-------------------------------------------------------------------------------------------------------------------------------------------------------------------|
| C4691 | PI | Inhibitor | 175 | <chem>c1ccc(c(c1)Cl)NC(=O)CN1C[C@@H](C(=O)N)N(CCCC(c2ccc(cc2)F)c2ccc(cc2)F)CC1)Cl</chem>                                                                          |
| C4692 | PI | Inhibitor | 175 | <chem>c1ccc2c(c1)c(=O)c1ccc(c1[nH]2)C(=O)Nc1ccc(cc1)OCCCN(CCCc1ccc(c1)OC)OC)C</chem>                                                                              |
| C4693 | PI | Inhibitor | 175 | <chem>C(=O)([C@H](C)[C@@H]([C@H](C)C1[C@H](C)[C@@H]2CC[C@](C)([C@H]3CC[C@@](C)([C@@H]4[C@@H](C)C[C@@H](C5[C@@H](C)C[C@@H](C)[C@@](CO)O5)O4)O3)O2)O1)O)OC)O</chem> |
| C4694 | PI | Inhibitor | 175 | <chem>c1ccc(cc1)N([C@@H]1Cc2ccc2[C@H]1OC)CCCN(CC)CC</chem>                                                                                                        |
| C4695 | PI | Inhibitor | 175 | <chem>c12c(cccc2)c(c2c(c1)ccc2)C(=O)OCCCCCN(CCCCO(=O)/C=C/c1ccc(c(c1)OC)OC)C</chem>                                                                               |
| C4696 | PI | Inhibitor | 175 | <chem>c1ccc(cc1)C(=CC(=O)OCCCN(CCCOC(=O)/C=C/c1ccc(c(c1)OC)OC)OC)C)c1ccc1</chem>                                                                                  |
| C4697 | PI | Inhibitor | 175 | <chem>c1ccc(cc1)c1ccc(cc1)/C=C/C(=O)OCCCN(CCCOC(=O)/C=C/c1ccc(c(c1)OC)OC)OC)C</chem>                                                                              |
| C4698 | PI | Inhibitor | 175 | <chem>c1cc(ccc1C(c1ccc(cc1)OC)C(=O)OCCCN(CCCOC(=O)/C=C/c1ccc(c(c1)OC)OC)OC)OC)C</chem>                                                                            |
| C4699 | PI | Inhibitor | 175 | <chem>c1c(cc(c(c1OC)OC)OC)/C=C/C(=O)O[C@H]1CC[C@@H](CC1)N([C@H]1CC[C@H](CC1)OC(=O)c1ccc(c(c1)OC)OC)OC)C</chem>                                                    |
| C4700 | PI | Inhibitor | 175 | <chem>c12c(cccc2)c(c2c(c1)ccc2)C(=O)OC1CCC(CC1)N(C1CCC(CC1)OC(=O)c1ccc(c(c1)OC)OC)OC)C</chem>                                                                     |
| C4701 | PI | Inhibitor | 175 | <chem>c1c(cc(c(c1OC)OC)OC)/C=C/C(=O)OCCCN(CCCOC(=O)c1ccc(c(c1)OC)OC)OC)C</chem>                                                                                   |
| C4702 | PI | Inhibitor | 175 | <chem>c12c(cccc2)c(c2c(c1)ccc2)C(=O)OCCCN(CCCOC(=O)c1ccc(c(c1)OC)OC)OC)C</chem>                                                                                   |
| C4703 | PI | Inhibitor | 175 | <chem>c1ccc2c(c1)c(=O)c1ccc(c1[nH]2)C(=O)Nc1ccc(cc1)OCCCN1Cc2cc(c(cc2CC1)OC)OC</chem>                                                                             |
| C4704 | PI | Inhibitor | 175 | <chem>c1cc(c(c1C[C@@H]1c2cc(c(cc2CCN1)OC)OC)OC)OC</chem>                                                                                                          |
| C4705 | PI | Inhibitor | 175 | <chem>c1cc2c(c(c1)OC)C(=O)c1c(c(c3c(c1O)[C@H](C[C@](C(=O)C)(C3)O)O[C@H]1C[C@@H]([C@@H]([C@H](C)O1)O)NC(=O)C)O)C2=O</chem>                                         |
| C4706 | PI | Inhibitor | 175 | <chem>c1ccc(cc1)OC(=O)N1C=C[C@H](c2ccc(cc2)OC)C(=C1)C(=O)CC</chem>                                                                                                |
| C4707 | PI | Inhibitor | 175 | <chem>c1ccc(cc1)OC(=O)N1C=C[C@H](c2ccc(cc2)C)C(=C1)C(=O)C</chem>                                                                                                  |
| C4708 | PI | Inhibitor | 175 | <chem>c1ccc(cc1)OC(=O)N1C=C[C@H](c2cccc2OC)C(=C1)C(=O)C</chem>                                                                                                    |
| C4709 | PI | Inhibitor | 175 | <chem>c1ccc(cc1)OC(=O)N1C=C[C@H](c2ccc(cc2)OC)C(=C1)C(=O)C</chem>                                                                                                 |
| C4710 | PI | Inhibitor | 175 | <chem>c1ccc(cc1)OC(=O)N1C=C[C@H](c2ccc(cc2)C)C(=C1)C(=O)CC</chem>                                                                                                 |
| C4711 | PI | Inhibitor | 175 | <chem>c1ccc(cc1)OC(=O)N1C=C[C@H](c2cccc2OC)C(=C1)C(=O)CC</chem>                                                                                                   |
| C4712 | PI | Inhibitor | 175 | <chem>c1ccc(cc1)/C=C(/c1ccc1)CCCl)/c1ccc(cc1)OCCNC</chem>                                                                                                         |
| C4713 | PI | Inhibitor | 175 | <chem>c1cc(ccc1[C@@H](C1(CCCCC1)O)CNC)OC</chem>                                                                                                                   |
| C4714 | PI | Inhibitor | 175 | <chem>c1ccc2c(c1)c(=O)c1ccc(c1[nH]2)C(=O)Nc1ccc(cc1)CN(Cc1ccc(c(c1)OC)OC)C</chem>                                                                                 |
| C4715 | PI | Inhibitor | 175 | <chem>c1ccc(cc1)/C=C(/c1ccc1)CC)/c1ccc(cc1)OCCNC</chem>                                                                                                           |
| C4716 | PI | Inhibitor | 175 | <chem>c1ccc(cc1)C(c1ccc1)CCN(C(=O)CN(C(=O)CNCCC(C)C)CCc1ccc(cc1)Cl)CC(=O)N</chem>                                                                                 |
| C4717 | PI | Inhibitor | 175 | <chem>c1ccc2c(c1)[C@@H](c1ccc(cc1)OCCN(CC)CC)C(c1ccc(cc1)OC)C(=O)O2</chem>                                                                                        |
| C4718 | PI | Inhibitor | 175 | <chem>c1ccc(cc1)C(=O)OCCN(Cc1ccc(cc1)OC)CCN(Cc1ccc(cc1)OC)CCOC(=O)c1ccc1</chem>                                                                                   |
| C4719 | PI | Inhibitor | 175 | <chem>c1ccc(cc1)COc1cc(cc1OCc1ccc1)OCc1ccc1)C(=O)OCCN(CC)CC</chem>                                                                                                |
| C4720 | PI | Inhibitor | 175 | <chem>c1c(cc(C)nc1C)c1c(cc2c(c1F)n(cc1c2nn(c1=O)C1CCC(CC1)N(C)C)C1CC1)F</chem>                                                                                    |
| C4721 | PI | Inhibitor | 175 | <chem>c1ccc2c(c1)c(=O)cc1ccc(c(c1OC)OC)OC)o2</chem>                                                                                                               |
| C4722 | PI | Inhibitor | 175 | <chem>C(#N)c1c(c2ccc(cc2)Cl)c2c(CC(C)C)CC2=O)n(c1=S)C1[C@@H]([C@H]([C@@H]([C@@H](COC(=O)C)O1)OC(=O)C)OC(=O)C)OC(=O)C</chem>                                       |
| C4723 | PI | Inhibitor | 175 | <chem>c12c(cccc2)c(ccc1)[C@@H](C(=O)OCCN1CCN(CC1)CCOC(=O)[C@H](c1c2c(ccc1)ccc2)C)C</chem>                                                                         |
| C4724 | PI | Inhibitor | 175 | <chem>c1ccc2c(c1)c(=O)c1ccc(c1[nH]2)C(=O)Nc1ccc(cc1)CCN(Cc1ccc(c(c1)OC)OC)C</chem>                                                                                |
| C4725 | PI | Inhibitor | 175 | <chem>c1ccc(cc1)C1=C(c2ccc(cc2)OCCN2CCCC2)c2ccc(cc2CC1)OC</chem>                                                                                                  |
| C4726 | PI | Inhibitor | 175 | <chem>c12c(cccc2)c(ccc1)OC[C@@H](CN1CCN(c2cccc2OC)CC1)O</chem>                                                                                                    |
| C4727 | PI | Inhibitor | 175 | <chem>c1ccc(cc1)CN(CCO(=O)C1=C(C)NC(=C(C(=O)OC)[C@@H]1c1ccc(c1)[N+](=O)[O-])C)C</chem>                                                                            |
| C4728 | PI | Inhibitor | 175 | <chem>c12c3ccc1[C@]1(C[C@H](CN([C@@H]1Cc2en3C)C)COC(=O)c1cc(cnc1)Br)OC</chem>                                                                                     |
| C4729 | PI | Inhibitor | 175 | <chem>c12c(cccc1)n(c(CN1CCN(CC(=O)NC(C)C)CC1)n2)CCC(=O)c1ccc1 c1cc(cc(c1)[N+](=O)[O-])C1C(=C(C)NC(=C1C(=O)OCCOC)C(=O)OCCOC</chem>                                 |
| C4730 | PI | Inhibitor | 175 | <chem>c1ccc2c(c1)c(=O)c1ccc(c1[nH]2)C(=O)Nc1ccc(cc1)CCCN(Cc1ccc(c(c1)OC)OC)C</chem>                                                                               |
| C4731 | PI | Inhibitor | 175 | <chem>c1ccc(cc1)/C=C(/c1ccc(cc1)OC)\c1ccc(cc1)OCCN1CCCC1/[N+](=O)[O-]</chem>                                                                                      |
| C4732 | PI | Inhibitor | 175 | <chem>c1ccc(cc1)[C@H](CCN)Oe1ccc(cc1)C(F)(F)F</chem>                                                                                                              |
| C4733 | PI | Inhibitor | 175 | <chem>c1ccc2c(c1)C(=CCNC)c1ccc1CC2</chem>                                                                                                                         |
| C4734 | PI | Inhibitor | 175 | <chem>c1cc(c(c2c1[C@@H]([C@@H]1c3c(cc4c(c3OC)OCO4)CCN1C)OC2=O)OC)OC</chem>                                                                                        |
| C4735 | PI | Inhibitor | 175 | <chem>c12c(cc(c(c1)OC)OC)nenc2Nc1ccc(c1)Br</chem>                                                                                                                 |



|       |    |           |     |                                                                                                                                                                  |
|-------|----|-----------|-----|------------------------------------------------------------------------------------------------------------------------------------------------------------------|
| C4737 | PI | Inhibitor | 175 | c1ccc2c(c1)c(=O)c1cccc(c1[nH]2)C(=O)Nc1ccc(cc1)CCCCN(Cc1ccc(c(c1)OC)OC)C                                                                                         |
| C4738 | PI | Inhibitor | 175 | c1ccc2c(c1)N(c1cc(ccc1[S@]2=O)Cl)CCCN(C)C                                                                                                                        |
| C4739 | PI | Inhibitor | 175 | C(#CCOC(=O)[C@](c1ccccc1)(C1CCCC1)O)CN(CC)CC                                                                                                                     |
| C4740 | PI | Inhibitor | 175 | c12c(cc(c(c1)OC)OC)[nH]c(c2CCN1CCN(c2ccccc2)CC1)C                                                                                                                |
| C4741 | PI | Inhibitor | 175 | c12c(cccc1)nc1c(c2NC(=O)Cc2ccccc2)CCN1Cc1ccccc1                                                                                                                  |
| C4742 | PI | Inhibitor | 175 | c1cc(ccc1C(c1ccc(cc1)F)CCCN1CCC(c2ccc(c(c2)C(F)(F)F)Cl)(CC1)O)F                                                                                                  |
| C4743 | PI | Inhibitor | 175 | c1ccc(c(c1)CCNCC(=O)N(CC(=O)N(CC(=O)N)CCc1ccc(cc1Cl)Cl)CCc1ccc(cc1Cl)Cl)F                                                                                        |
| C4744 | PI | Inhibitor | 175 | c1cc(ccc1CCNCC(=O)N(CC(=O)N(CC(=O)N)CCc1ccc(cc1Cl)Cl)CCc1ccc(cc1Cl)Cl)F                                                                                          |
| C4745 | PI | Inhibitor | 175 | c1cc(cc(c1)OC)/C=N\OC[C@@H](CN1CCN(c2ccccc2OC)CC1)O                                                                                                              |
| C4746 | PI | Inhibitor | 175 | c1ccc2c(c1)C(=Nc1ccccc1C2)N1CCN(CC1)C                                                                                                                            |
| C4747 | PI | Inhibitor | 175 | c1cc(cc(c1)Cl)CN1C(=S)NC(=S)N(Cc2ccccc2)Cl)CC1                                                                                                                   |
| C4748 | PI | Inhibitor | 175 | c1ccc2c(c1)c(=O)c1cccc(c1[nH]2)C(=O)Nc1ccc(cc1)CCCCN(Cc1ccc(c(c1)OC)OC)C                                                                                         |
| C4749 | PI | Inhibitor | 175 | c1ccc2c(c1)N(c1ccccc1O2)CCCN1CCOCC1                                                                                                                              |
| C4750 | PI | Inhibitor | 175 | c1ccc2c(c1)N(c1ccccc1O2)CCCN1CCCCC1                                                                                                                              |
| C4751 | PI | Inhibitor | 175 | c1ccc2c(c1)N(c1ccccc1O2)C(=O)CN1CCCCC1                                                                                                                           |
| C4752 | PI | Inhibitor | 175 | c1ccc2c(c1)N(c1ccccc1O2)CCCN(CC)CC                                                                                                                               |
| C4753 | PI | Inhibitor | 175 | c1ccc2c(c1)N(c1ccccc1O2)CCCN(CCO)CCO                                                                                                                             |
| C4754 | PI | Inhibitor | 175 | c1ccc2c(c1)N(c1ccccc1O2)CCCN1CCOCC1                                                                                                                              |
| C4755 | PI | Inhibitor | 175 | c1ccc2c(c1)N(c1ccccc1O2)CCCN1CCCCC1                                                                                                                              |
| C4756 | PI | Inhibitor | 175 | c1ccc(cc1)NC(=N)NC(=O)c1c(nc(c(n1)Cl)N)N                                                                                                                         |
| C4757 | PI | Inhibitor | 175 | c1c2c(ccc1OC(=O)NC)N([C@H]1[C@@]2(C)CCN1C)C                                                                                                                      |
| C4758 | PI | Inhibitor | 175 | c1ccc2c(c1)c(=O)c1cccc(c1[nH]2)C(=O)Nc1ccc(cc1)OCCCN(Cc1ccc(c(c1)OC)OC)C                                                                                         |
| C4759 | PI | Inhibitor | 175 | c1cc2c(cc1CN1CCN(C/C=C(\C)/CC/C=C(\C)/CCC=C(C)C)CC1)OCO2                                                                                                         |
| C4760 | PI | Inhibitor | 175 | c1ccc2c(c1)/C(=C/CCN1CCN(CC1)CCO)/c1cc(ccc1OC2)Cl                                                                                                                |
| C4761 | PI | Inhibitor | 175 | c1cc(ccc1C(=O)CCCN1CCC(C(=O)N)(CC1)N1CCCCC1)F                                                                                                                    |
| C4762 | PI | Inhibitor | 175 | c1cc2c(cc1/C=C/C1[C@@H](c3ccc4c(c3)OCO4)C=C[C@H](C(=O)N3CCCCC3)[C@H]1C(=O)N1CCCCC1)OCO2                                                                          |
| C4763 | PI | Inhibitor | 175 | c1ccc(cc1)C(=C1CCN(CC1)CCOCCOCCO)c1ccccc1                                                                                                                        |
| C4764 | PI | Inhibitor | 175 | c1ccc2c(c1)C(=C1CCN([C@@H]1C)CC)c1ccccc1CC2                                                                                                                      |
| C4765 | PI | Inhibitor | 175 | c1ccc(cc1)/C(=C\1/CCN(CC)C1)/c1ccc(cc1)F                                                                                                                         |
| C4766 | PI | Inhibitor | 175 | C1(=O)C(=O)C[C@@]2(C)[C@@H](C1)CC[C@H]1[C@H]3CC[C@H](CC)[C@]3(C)CC[C@@H]21                                                                                       |
| C4767 | PI | Inhibitor | 175 | c1ccc2c(c1)c(=O)c1cccc(c1[nH]2)C(=O)Nc1ccc(cc1)/C=C/CN(Cc1ccc(c(c1)OC)OC)C                                                                                       |
| C4768 | PI | Inhibitor | 175 | c1ccc(cc1)C[C@H](C)NCCC(c1ccccc1)c1ccccc1                                                                                                                        |
| C4769 | PI | Inhibitor | 175 | c1ccc(cc1)[C@H]1C(=O)O[C@@H](C)[C@H](C)[C@H](C(=O)N[C@@H](C(=O)N2[C@@H](C(=O)N([C@@H](C(=O)N3[C@@H](C(=O)N1)CC(=O)CC3)Cc1ccc(cc1)N(C)C)CCC2)CC)NC(=O)c1c(cccn1)O |
| C4770 | PI | Inhibitor | 175 | c1ccc(cc1)C(c1ccccc1)(C(=O)OCCN(CC)CC)CCC                                                                                                                        |
| C4771 | PI | Inhibitor | 175 | c1ccc2c(c1)N(c1cc(ccc1S2)Cl)CCCN1CCN(CC1)C                                                                                                                       |
| C4772 | PI | Inhibitor | 175 | c1cc(ccc1/C(=N\CCCC(=O)N)/c1cc(ccc1O)F)Cl                                                                                                                        |
| C4773 | PI | Inhibitor | 175 | c1ccc(cc1)CCC(=O)c1ccccc1OC[C@@H](CNCCC)O                                                                                                                        |
| C4774 | PI | Inhibitor | 175 | c1ccc(cc1)CCC(=O)c1ccccc1OC[C@H](CN(CCC)C)O                                                                                                                      |
| C4775 | PI | Inhibitor | 175 | c1ccc(cc1)CCC(=O)c1ccccc1OC[C@H](CN(C)C)O                                                                                                                        |
| C4776 | PI | Inhibitor | 175 | c1ccc(cc1)CCC(=O)c1ccccc1OC[C@@H](CN(C(C)C)C(C)C)O                                                                                                               |
| C4777 | PI | Inhibitor | 175 | c1ccc2c(c1)c(=O)c1cccc(c1[nH]2)C(=O)Nc1ccc(cc1)C/C=C/CN(Cc1ccc(c(c1)OC)OC)C                                                                                      |
| C4778 | PI | Inhibitor | 175 | c1ccc(cc1)CCC(=O)c1ccccc1OC[C@H](CNCc1ccccc1)O                                                                                                                   |
| C4779 | PI | Inhibitor | 175 | c1ccc(cc1)CCC(=O)c1ccccc1OC[C@H](CN1CCCC1)O                                                                                                                      |
| C4780 | PI | Inhibitor | 175 | c1ccc(cc1)CCC(=O)c1ccccc1OC[C@@H](CN1CCN(c2ccccc2C)CC1)O                                                                                                         |
| C4781 | PI | Inhibitor | 175 | c1ccc(cc1)CCC(=O)c1ccccc1OC[C@H](CN1CCN(c2ccc(cc2)OC)CC1)O                                                                                                       |
| C4782 | PI | Inhibitor | 175 | c1ccc(cc1)CCC(=O)c1ccccc1OC[C@@H](CCC)O                                                                                                                          |

|       |    |           |     |                                                                                          |
|-------|----|-----------|-----|------------------------------------------------------------------------------------------|
| C4783 | PI | Inhibitor | 175 | <chem>c1ccc(cc1)CCC(=O)c1ccccc1OC[C@H](CN(CC)CC)O</chem>                                 |
| C4784 | PI | Inhibitor | 175 | <chem>c1ccc(cc1)CCC(=O)c1ccccc1OC[C@H](CN1CCCC1)O</chem>                                 |
| C4785 | PI | Inhibitor | 175 | <chem>c1ccc(cc1)CCC(=O)c1ccc(cc1)OC[C@H](CN1CCN(c2ccc(cc2)F)CC1)O</chem>                 |
| C4786 | PI | Inhibitor | 175 | <chem>c1ccc(cc1)CC[C@H](c1ccccc1OC[C@H](CN1CCN(c2ccc(cc2)F)CC1)O)O</chem>                |
| C4787 | PI | Inhibitor | 175 | <chem>c1ccc(cc1)CCC(=O)c1ccc(cc1)OC[C@@H](CN(C(C)C)C(C)C)O</chem>                        |
| C4788 | PI | Inhibitor | 175 | <chem>c1cc2c(c(c1)C(=O)Nc1cc(ccc1)CCN1Cc3cc(c(cc3CC1)OC)OC)[nH]c1ccccc1c1c2=O)OC</chem>  |
| C4789 | PI | Inhibitor | 175 | <chem>c1ccc(cc1)CC[C@@H](c1ccccc1OC[C@H](CN(C(C)C)C(C)C)O)O</chem>                       |
| C4790 | PI | Inhibitor | 175 | <chem>c1ccc(cc1)CC[C@@H](c1ccccc1OC[C@@H](CN(C(C)C)C(C)C)O)OC</chem>                     |
| C4791 | PI | Inhibitor | 175 | <chem>c1ccc(cc1)CCC(=O)c1ccccc1OC[C@@H](CNc1ccccc1)O</chem>                              |
| C4792 | PI | Inhibitor | 175 | <chem>c1ccc(cc1)CCC(=O)c1ccccc1OC[C@H](CN1CCN(Cc2ccccc2)CC1)O</chem>                     |
| C4793 | PI | Inhibitor | 175 | <chem>c1ccc(cc1)CCC(=O)c1ccccc1OC[C@H](CN1CCN(c2ccc(cc2)F)CC1)O</chem>                   |
| C4794 | PI | Inhibitor | 175 | <chem>c1ccc(cc1)CCC(=O)c1ccccc1OC[C@H](CNc1ccc(cc1)C(=O)OC)O</chem>                      |
| C4795 | PI | Inhibitor | 175 | <chem>c1ccc(cc1)CCC(=O)c1ccccc1OC[C@@H](CNc1ccc(cc1)C(F)(F)F)O</chem>                    |
| C4796 | PI | Inhibitor | 175 | <chem>c1ccc(cc1)CCC(=O)c1ccccc1OC[C@H](CNc1ccc(cc1)[N+](=O)[O-])O</chem>                 |
| C4797 | PI | Inhibitor | 175 | <chem>c1ccc(cc1)C(=O)N(CCC)C[C@H](COc1ccccc1C(=O)CCc1ccccc1)O</chem>                     |
| C4798 | PI | Inhibitor | 175 | <chem>c1ccc(cc1)CCC(=O)c1ccccc1OC[C@@H](CN(Cc1ccccc1)CCC)O</chem>                        |
| C4799 | PI | Inhibitor | 175 | <chem>c1ccc(c(c1)CCN1Cc2cc(c(cc2CC1)OC)OC)NC(=O)c1ccccc1c1c2=O)OC</chem>                 |
| C4800 | PI | Inhibitor | 175 | <chem>c1ccc(cc1)C1(CCN(CC1)C[C@H](COc1ccccc1C(=O)CC)O)O</chem>                           |
| C4801 | PI | Inhibitor | 175 | <chem>c1ccc(cc1)C(=O)N1CCN(C[C@@H](COc2ccccc2C(=O)CCc2ccccc2)O)CC1</chem>                |
| C4802 | PI | Inhibitor | 175 | <chem>c1ccc(cc1)CCC(=O)c1ccccc1OC[C@@H](CN1CCOCC1)O</chem>                               |
| C4803 | PI | Inhibitor | 175 | <chem>c1ccc(cc1)CCC(=O)c1ccccc1OC[C@@H](CN1CCC(c2ccccc2)(CC1)O)O</chem>                  |
| C4804 | PI | Inhibitor | 175 | <chem>c1ccc(cc1)CC[C@H](c1ccccc1OC[C@H](CN1CCCC1)O)O</chem>                              |
| C4805 | PI | Inhibitor | 175 | <chem>c1ccc(cc1)CC[C@@H](c1ccccc1OC[C@H](CN1CCCC1)O)OC</chem>                            |
| C4806 | PI | Inhibitor | 175 | <chem>c1ccc(cc1)CC[C@@H](c1ccccc1OC[C@H](CN1CCOCC1)O)OC</chem>                           |
| C4807 | PI | Inhibitor | 175 | <chem>c1ccc(cc1)CC[C@@H](c1ccccc1OC[C@@H](CNCCC(c1ccccc1)c1ccccc1)O)OC</chem>            |
| C4808 | PI | Inhibitor | 175 | <chem>c1ccc(cc1)C1(CCN(CC1)C[C@H](COc1ccccc1C(=O)C)O)O</chem>                            |
| C4809 | PI | Inhibitor | 175 | <chem>c12c(cccc2)c(ccc1)CCC(=O)c1ccccc1OC[C@@H](CN1CCCC1)O</chem>                        |
| C4810 | PI | Inhibitor | 175 | <chem>c1cc2c(c(c1)C(=O)Nc1cc(ccc1)CCCN1Cc3cc(c(cc3CC1)OC)OC)[nH]c1ccccc1c1c2=O)OC</chem> |
| C4811 | PI | Inhibitor | 175 | <chem>c12c(cccc2)c(ccc1)CCC(=O)c1ccccc1OC[C@H](CN(C(C)C)C(C)C)O</chem>                   |
| C4812 | PI | Inhibitor | 175 | <chem>c12c(cccc2)c(ccc1)CCC(=O)c1ccccc1OC[C@H](CN1CCOCC1)O</chem>                        |
| C4813 | PI | Inhibitor | 175 | <chem>c12c(cccc2)c(ccc1)CCC(=O)c1ccccc1OC[C@H](CN1CCC(c2ccccc2)(CC1)O)O</chem>           |
| C4814 | PI | Inhibitor | 175 | <chem>c12c(cccc2)c(ccc1)CCC(=O)c1ccccc1OC[C@@H](CNCCC(c1ccccc1)c1ccccc1)O</chem>         |
| C4815 | PI | Inhibitor | 175 | <chem>c1ccc(cc1)C(=O)c1ccccc1OC[C@@H](CN1CCN(c2ccc(cc2)F)CC1)O</chem>                    |
| C4816 | PI | Inhibitor | 175 | <chem>c1ccc(cc1)C(=O)c1ccccc1OC[C@H](CN1CCC(c2ccccc2)(CC1)O)O</chem>                     |
| C4817 | PI | Inhibitor | 175 | <chem>c1ccc(cc1)CCC(=O)c1ccc(ccc1OC[C@@H](CN1CCN(Cc2ccccc2)CC1)O)O</chem>                |
| C4818 | PI | Inhibitor | 175 | <chem>c1ccc(cc1)CCC(=O)c1ccc(ccc1OC[C@H](CNCCC)O)OCc1ccccc1</chem>                       |
| C4819 | PI | Inhibitor | 175 | <chem>c1ccc(cc1)CCC(=O)c1ccc(ccc1OC[C@@H](CN1CCCC1)O)OCc1ccccc1</chem>                   |
| C4820 | PI | Inhibitor | 175 | <chem>c1ccc(cc1)CCC(=O)c1ccc(ccc1OC[C@@H](CN(C(C)C)C(C)C)O)OCc1ccccc1</chem>             |
| C4821 | PI | Inhibitor | 175 | <chem>c1cc2c(c(c1)C(=O)Nc1cc(ccc1)CCCN(Cc1ccc(c(c1)OC)OC)C)[nH]c1ccccc1c1c2=O)OC</chem>  |
| C4822 | PI | Inhibitor | 175 | <chem>c1ccc(cc1)CCC(=O)c1ccc(ccc1OC[C@H](CN1CCN(Cc2ccccc2)CC1)O)OCc1ccccc1</chem>        |
| C4823 | PI | Inhibitor | 175 | <chem>c1ccc(cc1)CC[C@H](c1ccccc1OC[C@@H](CN1CCN(c2ccc(cc2)F)CC1)O)OC</chem>              |
| C4824 | PI | Inhibitor | 175 | <chem>c1ccc(cc1)[C@@](C(=O)O)[C@@H]1CCCN(C1)C(C1CCCCC1)O</chem>                          |
| C4825 | PI | Inhibitor | 175 | <chem>c1ccc(cc1)C[C@@](c1ccccc1)([C@@H](C)CN(C)C)OC(=O)CC</chem>                         |
| C4826 | PI | Inhibitor | 175 | <chem>c1ccc2c(c1)C=Cc1ccccc1C2CCCN</chem>                                                |
| C4827 | PI | Inhibitor | 175 | <chem>c12c(nc(nc1N1CCC(CC1)NC[C@H]1c3ccccc3COc3ccccc13)NCC=C)n(cn2)CC=C</chem>           |
| C4828 | PI | Inhibitor | 175 | <chem>c12c(nc(nc1NCC=C)N1CCC(CC1)NCC(c1ccc(cc1)F)c1ccc(cc1)F)n(cn2)CC=C</chem>           |

|       |    |           |     |                                                                                                                                                         |
|-------|----|-----------|-----|---------------------------------------------------------------------------------------------------------------------------------------------------------|
| C4829 | PI | Inhibitor | 175 | c12c(nc(nc1NCC=C)N1CCC(CC1)NC[C@@H]1c3ccccc3COc3ccccc13)n(cn2)CC=C                                                                                      |
| C4830 | PI | Inhibitor | 175 | c12c(nc(nc1NCC=C)N1CCC(CC1)NC[C@@H]1c3ccccc3CCc3cc(ccc13)OC)n(cn2)CC=C                                                                                  |
| C4831 | PI | Inhibitor | 175 | c1cc2c(c(c1)C(=O)Nc1ccc(cc1)OCCCN(Cc1ccc(c(c1)OC)OC)C)[nH]c1cccc(c1c2=O)C                                                                               |
| C4832 | PI | Inhibitor | 175 | c12c(cc(cc1)Cl)nc1c(cc(cc1)OC)c2N[C@H](C)CCCN(CC)CC                                                                                                     |
| C4833 | PI | Inhibitor | 175 | c12c(ccc(c1)OC)ncce2[C@@H]([C@H]1C[C@@H]2CCN1C[C@H]2C=C)O                                                                                               |
| C4834 | PI | Inhibitor | 175 | c1ccc2c(c1)CCc1cccc1N2[C@H]1C2CCN(CC2)C1                                                                                                                |
| C4835 | PI | Inhibitor | 175 | c1cc(cc(c1[C@@@]1(Cn2ccnc2)OC[C@@H](COc2ccc(cc2)n2ccnc2)O1)Cl)Cl                                                                                        |
| C4836 | PI | Inhibitor | 175 | c1cc(cc(c1[C@@@]1(Cn2ccnc2)OC[C@H](COc2ccc(cc2)N2CCN(C(=O)OCC)CC2)O1)Cl)Cl                                                                              |
| C4837 | PI | Inhibitor | 175 | c1cc(cc(c1[C@@@]1(Cn2ccnc2)OC[C@H](COc2ccc(cc2)N2CCN(C(=O)C)CC2)O1)Cl)Cl                                                                                |
| C4838 | PI | Inhibitor | 175 | c1ccc2c(c1)n(c(=O)[nH]2)C1CCN(CCCCc2ccc(cc2)F)CC1                                                                                                       |
| C4839 | PI | Inhibitor | 175 | c12c(nc(c3ccccc3)n2)N2[C@H](C)COCC2)nc(nc1N(C[C@@H](C)O)CCO)N1[C@@H](C)COCC1                                                                            |
| C4840 | PI | Inhibitor | 175 | c12c(nc(c3ccccc3)n2)N2CCOCC2)nc(nc1N1CCOCC1)N1CCOCC1                                                                                                    |
| C4841 | PI | Inhibitor | 175 | c12c(nc(c3ccccc3)n2)N2CCOCC2)nc(nc1N(CCO)C)N1CCOCC1                                                                                                     |
| C4842 | PI | Inhibitor | 175 | c1cc2c(c(c1)C(=O)Nc1ccc(cc1)OCCN(Cc1ccc(c(c1)OC)OC)C)[nH]c1cccc(c1c2=O)OC                                                                               |
| C4843 | PI | Inhibitor | 175 | c12c(nc(c3ccccc3)n2)N2CCOCC2)nc(nc1N(CC)CCO)N1CCOCC1                                                                                                    |
| C4844 | PI | Inhibitor | 175 | c12c(nc(c3ccccc3)n2)N2CCOCC2)nc(nc1N(Cc1cccc1)CCO)N1CCOCC1                                                                                              |
| C4845 | PI | Inhibitor | 175 | c12c(c(nc(n2)N(CCOC)CO)N(CC)CC)nc(nc1N(CC)CC)N(CCOC)CCO                                                                                                 |
| C4846 | PI | Inhibitor | 175 | c1ccc(cc1)CNc1c(nc2c(n1)O[C@@H](N[C@@H]2N1CCSCC1)N1CCNCC1)Cl                                                                                            |
| C4847 | PI | Inhibitor | 175 | c1ccc(cc1)C[C@@H](C)N[C@@H](C)COc1cccc1                                                                                                                 |
| C4848 | PI | Inhibitor | 175 | c1c2c(c(c1OC)OC)OC)mnn(c2=O)C[C@@H](CN1CCOCC1)OC(=O)c1cc(c(c1)OC)OC)OC                                                                                  |
| C4849 | PI | Inhibitor | 175 | c1ccc(cc1)[C@H]([C@H]1CNCCO1)Oe1cccc1OCC                                                                                                                |
| C4850 | PI | Inhibitor | 175 | c12c(cc(cc1)OC)[nH]c1c2CCN2[C@@H]1C[C@H]1[C@H](C(=O)OC)[C@H](C(C[C@@H]1C2)OC(=O)/C=C/c1cc(c(c1)OC)OC)OC)OC                                              |
| C4851 | PI | Inhibitor | 175 | c12c(cc(cc1)OC)[nH]c1c2CCN2[C@@H]1C[C@@H]1[C@H](C(=O)OC)[C@H](C(C[C@@H]1C2)OC(=O)c1cc(c(c1)OC)OC)OC)OC                                                  |
| C4852 | PI | Inhibitor | 175 | c1ccc(cc1)COC(=O)C[C@@H](C(=O)N[C@@H](C(=O)OC(C)C)CCCCNC(=O)OCc1cccc1)NC(=O)OC(C)C)C                                                                    |
| C4853 | PI | Inhibitor | 175 | c1cc(ccc1CN1C(=S)NC(=S)N(Cc2ccc(cc2)Cl)CC1)Cl                                                                                                           |
| C4854 | PI | Inhibitor | 175 | c1cc2c(c(c1)C(=O)Nc1ccc(cc1)OCCCN(Cc1ccc(c(c1)OC)OC)C)[nH]c1cccc(c1c2=O)F                                                                               |
| C4855 | PI | Inhibitor | 175 | c1ccc(cc1)COC(=O)CC[C@@H](C(=O)NCCCC[C@H](C(=O)OC)NC(=O)[C@@H](CC(=O)OCc1cccc1)NC(=O)OC(C)C)NC(=O)OC(C)C)C                                              |
| C4856 | PI | Inhibitor | 175 | c12c3e4c(c(c1O)O)[C@@](C4=O)(O)O/C=C/[C@@H]([C@@H](C)[C@H]([C@H](C)[C@H]([C@H]([C@H]/C=C/C(=O)Nc1cc3O)/C=N1CCN(CC1)C)c2O)/C)O)OC(=O)C)OC                |
| C4857 | PI | Inhibitor | 175 | C(#N)C[C@@H]1c2cccc2C(=Nc2cc(ccc12)Cl)C1CCN(CC1)C                                                                                                       |
| C4858 | PI | Inhibitor | 175 | c12c(cc(cc1)F)onc2C1CCN(CCc2c(C)nc3CCCCn3c2=O)CC1                                                                                                       |
| C4859 | PI | Inhibitor | 175 | c1c2c(cc(c1OC)OC)[C@H]1C[C@](C)(CC)[C@H](CC(C)C)CN1CC2                                                                                                  |
| C4860 | PI | Inhibitor | 175 | c1cc(ccc1CC[C@H]1c2cc(c(cc2CCN1)OC)OC)OC                                                                                                                |
| C4861 | PI | Inhibitor | 175 | c1cc(ccc1CC[C@H]1c2cc(c(cc2CCN1)OC)OC)OC                                                                                                                |
| C4862 | PI | Inhibitor | 175 | c1cc(ccc1C)CC[C@@H]1c2cc(c(cc2CCN1)OC)OC                                                                                                                |
| C4863 | PI | Inhibitor | 175 | c1cc(ccc1CC[C@H]1c2cc(c(cc2CCN1)OC)OC)O                                                                                                                 |
| C4864 | PI | Inhibitor | 175 | c1cc(c(cc1CC[C@H]1c2cc(c(cc2CCN1)OC)OC)OC)OC                                                                                                            |
| C4865 | PI | Inhibitor | 175 | c1cc2c(c(c1)C(=O)Nc1ccc(cc1)CCN(Cc1ccc(c(c1)OC)OC)C)[nH]c1cccc(c1c2=O)F                                                                                 |
| C4866 | PI | Inhibitor | 175 | c1cc2c(cc1CC[C@@H]1c3cc(c(cc3CCN1)OC)OC)OCO2                                                                                                            |
| C4867 | PI | Inhibitor | 175 | c1cc(ccc1CC)CC[C@H]1c2cc(c(cc2CCN1)OC)OC                                                                                                                |
| C4868 | PI | Inhibitor | 175 | c1cc(ccc1)C1CCN(CC1)CCCN1C(=O)[C@](c2cccc2)(c2ccc(cc2)OC)NC1=O                                                                                          |
| C4869 | PI | Inhibitor | 175 | C1(=N)OCCOC[C@@H](C)C[C@@](C)[C@@H](C)C[C@@H](C(=O)O[C@H](CC)[C@](C)([C@@H]([C@H]1C)O)OC)OC1[C@](C)([C@H](C)O1)OC)OC1[C@@H]([C@H](C)[C@@H](C)O1)N(C)O)O |
| C4870 | PI | Inhibitor | 175 | c1cc(ccc1C(c1ccc(cc1)F)CNC1CCN(Cc2nc(nc(n2)NCC=C)NCC=C)CC1)F                                                                                            |
| C4871 | PI | Inhibitor | 175 | c1ccc(c(c1)N1CCN(C[C@@H](COc2cc3c(cc2)N(C(=O)C3)O)CC1)OC                                                                                                |
| C4872 | PI | Inhibitor | 175 | c1ccc(c(c1)N1CCN(C[C@H](COc2cc3c(cc2)NC(=O)CC3)O)CC1)OC                                                                                                 |
| C4873 | PI | Inhibitor | 175 | c12c(cccc1)c(c1cccc1O)nc(c2)N1CCN(CCCC(=O)c2ccc(cc2)F)CC1                                                                                               |
| C4874 | PI | Inhibitor | 175 | c12c(cccc1)c(c1cccc1OC)nc(c2)N1CCN(CCCC(=O)c2ccc(cc2)F)CC1                                                                                              |



|       |    |           |     |                                                                                                                                                               |
|-------|----|-----------|-----|---------------------------------------------------------------------------------------------------------------------------------------------------------------|
| C4921 | PI | Inhibitor | 175 | c1ccc(cc1)C(=O)O[C@H]1[C@@]2([C@@]3([C@H](C)C[C@H]([C@@H]2OC(=O)C)OC(=O)C)[C@@H]([C@H](C)C)O3)[C@@H]1OC(=O)c1ccccc1)OC(=O)C)COC(=O)C                          |
| C4922 | PI | Inhibitor | 175 | c1ccc(cc1)C(=O)O[C@H]1[C@@]2(C)[C@@]3([C@@]([C@H](C)C[C@H]1OC(=O)C)O)[C@H]([C@H](C)C)O3)[C@@H]([C@H]2OC(=O)c1ccccc1)OC(=O)c1ccccc1)OC(=O)C                    |
| C4923 | PI | Inhibitor | 175 | c1ccc(cc1)C(=O)O[C@H]1[C@@]2(C)[C@@]3([C@@]([C@H](C)C[C@H]([C@@H]2OC(=O)c2ccccc2)OC(=O)c2ccccc2)O)[C@@H]([C@H](C)C)O3)[C@@H]1O)OC(=O)C                        |
| C4924 | PI | Inhibitor | 175 | c1ccc(cc1)C(=O)O[C@H]1C(=O)[C@H]2C(C)O[C@@]3([C@@]1([C@@H]([C@H](C)C[C@@]3(C)O)OC(=O)c1ccccc1)OC(=O)c1ccccc1)COC(=O)C)[C@H]2OC(=O)C                           |
| C4925 | PI | Inhibitor | 175 | c1ccc(cc1)[C@](c1ccc(cc1)C1)(C)OCCN1CCCCC1                                                                                                                    |
| C4926 | PI | Inhibitor | 175 | c1cc(c(cc1[C@@H]1C(CO)O)c2ccc(cc2O1)[C@@H]1[C@H](C(=O)c2c(ccc2O1)O)O)O)OC)O                                                                                   |
| C4927 | PI | Inhibitor | 175 | c1cc(c(cc1CCC)OC)OCC(=O)N1CCN(C(=O)CO)c2ccc(cc2OC)CCC)CC1                                                                                                     |
| C4928 | PI | Inhibitor | 175 | c1=C=C=C(C)[C@H](C)[C@@H]2CC[C@H](C)[C@](C(=O)C)N3[C@H](C(=O)O)[C@H](C)C[C@@H](C=C1)C)OC)O)[C@H](C)C[C@@H]1CC[C@H]([C@@H](C)OC)O)CCCC3)O)O2)OC                |
| C4929 | PI | Inhibitor | 175 | c12c(cc3c(c1)OCO3)[nH]cc2CCN1CCN(c2cccc2OC)CC1                                                                                                                |
| C4930 | PI | Inhibitor | 175 | c1cc2c(c(c1)C(=O)Nc1ccc(cc1OC)OCCCN(Cc1ccc(c(c1)OC)OC)C)[nH]c1cccc(c1c2=O)C                                                                                   |
| C4931 | PI | Inhibitor | 175 | c1ccc(cc1)N1C2(C(=O)NC1)CCN(CC2)CCCOc1ccc(cc1)F                                                                                                               |
| C4932 | PI | Inhibitor | 175 | c1ccc(cc1)N1C2(C(=O)NC1)CCN(CC/C=C/c1ccc(cc1)F)\C)CC2                                                                                                         |
| C4933 | PI | Inhibitor | 175 | c12c(cc(cc1OC)[nH]c1c2CCN2[C@H]1C[C@@H]1[C@@H](C(=O)OC)[C@@H](C(C[C@H]1C2)OC(=O)c1cc(c(c1)OC)OC(=O)OCC)OC)OC                                                  |
| C4934 | PI | Inhibitor | 175 | C(#N)[C@](c1ccccc1)C(F)(F)F(CCCN(CCCc1ccc(c(c1)OC)OC)C)C(C)C                                                                                                  |
| C4935 | PI | Inhibitor | 175 | c1cc(c(c(c1OC)OC)OC)C(=O)OCCCCCCCCN(CC)CC                                                                                                                     |
| C4936 | PI | Inhibitor | 175 | C=CC[C@@H]1C=C(C)C[C@H](C)CC([C@@H]2[C@H](C)[C@@H](C)[C@@H](C(=O)C(=O)N3[C@H](C(=O)O)[C@H](C=C/C4CC[C@H](C4)OC)O)C)[C@H](C)[C@H](CC1=O)O)CCCC3)O)O2)OC)OC     |
| C4937 | PI | Inhibitor | 175 | c1ccc(cc1)[C@@H]1c2ccc(cc2[C@@H](C1)N1CCN(CC1)CCO)C(F)F)F                                                                                                     |
| C4938 | PI | Inhibitor | 175 | [C@@H]1(C(=O)C[C@H](C)[C@@]2(C)[C@@H]([C@H](C(=O)[C@H](C)C[C@](C)[C@@H]([C@H](C1=O)C)OC1[C@@H]([C@H](C)[C@@H](C)O1)N(C)O)OC)N(C(=O)O2)CCCCn1cc(c2ccccc2)nc1)C |
| C4939 | PI | Inhibitor | 175 | c1cc2c(c(c1)C(=O)Nc1ccc(cc1OC)CCN(Cc1ccc(c(c1)OC)OC)C)[nH]c1cccc(c1c2=O)F                                                                                     |
| C4940 | PI | Inhibitor | 175 | c1cc(cc(c1[C@@]1(Cn2en2)OC[C@H](CO)c2ccc(cc2)N2CCN(C(C)C)CC2)O1)Cl)Cl                                                                                         |
| C4941 | PI | Inhibitor | 175 | c1ccc(cc1)C(c1ccccc1)C[C@@H](C)NC(C)C)C                                                                                                                       |
| C4942 | PI | Inhibitor | 175 | c1ccc(cc1C(C)C)OCCCCCN1CCN(c2ccc(c(c2)Cl)C)CC1                                                                                                                |
| C4943 | PI | Inhibitor | 175 | c1ccc2c(c1)[C@@H](C([C@H](C)N2)OC(=O)c1ccc(cc1)C)N1CCCC1                                                                                                      |
| C4944 | PI | Inhibitor | 175 | c1ccc2c(c1)[C@@H](C([C@H](C)N2)OC(=O)c1ccc(cc1)C)N[C@H](C)CCCN(CC)CC                                                                                          |
| C4945 | PI | Inhibitor | 175 | c1ccc(cc2c1Cc1c(ccs1)C(=N2)C1CCN(CC1)C)Cl                                                                                                                     |
| C4946 | PI | Inhibitor | 175 | c12C=C3/C(=O)[C@](C(=N3)/C=c3/cc(/c(=C/C4=N/C=C/c(c1)C)[nH]2)/[C@@](C4=O)C)C1[C@@H](C[C@H](C)C)O1)OC(=O)C)/[nH]3)C(C)[C@H]1[C@@H](C[C@H](C)C)O1)OC(=O)C       |
| C4947 | PI | Inhibitor | 175 | c1ccc(c(c1)C)N1CCN(CCCO)c2cccn2)CC1                                                                                                                           |
| C4948 | PI | Inhibitor | 175 | c1cc2c(c(c1)C(=O)Nc1ccc(cc1)CCN(Cc1ccc(c(c1)OC)OC)C)[nH]c1c(ccc1OC)OC)c2=O                                                                                    |
| C4949 | PI | Inhibitor | 175 | c1ccc(cc1C(c1ccc(cc1)F)NC1CCN(c2nc(nc(n2)NCC=C)NCC=C)CC1)F                                                                                                    |
| C4950 | PI | Inhibitor | 175 | c1ccc(cc1C(c1ccc(cc1)F)N(C1CCN(c2nc(nc(n2)NCC=C)NCC=C)CC1)CC)F                                                                                                |
| C4951 | PI | Inhibitor | 175 | c1ccc(cc1C(c1ccc(cc1)F)N(C1CCN(c2nc(nc(n2)NCC=C)NCC=C)CC1)CC=C)F                                                                                              |
| C4952 | PI | Inhibitor | 175 | c1ccc(cc1C(c1ccc(cc1)F)NC1CCN(c2nc(nc(n2)NCCC)NCC=C)CC1)F                                                                                                     |
| C4953 | PI | Inhibitor | 175 | c1ccc(c(c1)C)[C@H](c1ccc(cc1)OC)OC)CNC1CCN(c2nc(nc(n2)NCC=C)NCC=C)CC1                                                                                         |
| C4954 | PI | Inhibitor | 175 | c1ccc(cc1[C@H](C1CCCC1)CNC1CCN(c2nc(nc(n2)NCC=C)NCC=C)CC1)F                                                                                                   |
| C4955 | PI | Inhibitor | 175 | c1ccc2c(c1)C(c1ccccc1O2)CNC1CCN(c2nc(nc(n2)NCC=C)NCC=C)CC1                                                                                                    |
| C4956 | PI | Inhibitor | 175 | c1ccc2c(c1)[C@H](c1ccccc1OC2)CNC1CCN(c2nc(nc(n2)NCC=C)NCC=C)CC1                                                                                               |
| C4957 | PI | Inhibitor | 175 | c1ccc(cc(c1)Cl)CN1C(=O)N[C@H](N(Cc2cccc(c2)Cl)CC1)SC                                                                                                          |
| C4958 | PI | Inhibitor | 175 | c1ccc2c(c1)c(=O)c1ccc(c1n2C)C(=O)Nc1ccc(cc1)CCN(Cc1ccc(c(c1)OC)OC)C                                                                                           |
| C4959 | PI | Inhibitor | 175 | c1ccc2c(c1)[C@H](c1ccc(cc1S(=O)(=O)N2C)Cl)CNC1CCN(c2nc(nc(n2)NCC=C)NCC=C)CC1                                                                                  |
| C4960 | PI | Inhibitor | 175 | c1ccc2c(c1)CCc1ccccc1C2CNC1CCN(c2nc(nc(n2)Cl)NCC=C)CC1                                                                                                        |
| C4961 | PI | Inhibitor | 175 | c1ccc2c(c1)CCc1ccccc1C2CNC1CCN(c2nc(nc(n2)OC)NCC=C)CC1                                                                                                        |
| C4962 | PI | Inhibitor | 175 | c1ccc2c(c1)CCc1ccc(cc1)[C@H]2CNC1CCN(c2nc(nc(n2)NCC=C)NCC=C)CC1)OC                                                                                            |
| C4963 | PI | Inhibitor | 175 | c1ccc(cc1C(c1ccc(cc1)F)N1CCN(CC1)Nc1nc(nc(n1)NCC=C)NCC=C)F                                                                                                    |
| C4964 | PI | Inhibitor | 175 | c1ccc2c(c1)CCc1ccccc1C2C(=O)NN1CCN(c2nc(nc(n2)NCC=C)NCC=C)CC1                                                                                                 |
| C4965 | PI | Inhibitor | 175 | c1ccc(cc(c1)C(F)(F)F)C1(CCN(CCCC(=O)c2ccc(cc2)F)CC1)O                                                                                                         |
| C4966 | PI | Inhibitor | 175 | c1ccc(cc1)[C@](CC)(COC(=O)c1ccc(c(c1)OC)OC)OC)N(C)C                                                                                                           |



|       |    |           |     |                                                                                                                           |
|-------|----|-----------|-----|---------------------------------------------------------------------------------------------------------------------------|
| C5013 | PI | Inhibitor | 175 | <chem>c1ccc(cc1)CN1CCN([C@H]2c3cccc3N(C(=O)c3ccc(cc3)C)[C@@H](C)[C@@H]2O)CC1</chem>                                       |
| C5014 | PI | Inhibitor | 175 | <chem>c1ccc2c(c1)[C@@H]([C@H]([C@H](C)N2C(=O)c1ccc(cc1)C)O)N[C@H](C)CCCN(CC)CC</chem>                                     |
| C5015 | PI | Inhibitor | 175 | <chem>c1ccc(cc1)CN[C@H]1c2cccc2N(C(=O)c2ccc(cc2)C)[C@@H](C)[C@@H]1O</chem>                                                |
| C5016 | PI | Inhibitor | 175 | <chem>c12c(cccc1)[nH]c1c2CCN2[C@H]1C[C@H]1[C@H](C(=O)OC)[C@H](CC[C@H]1C2)O</chem>                                         |
| C5017 | PI | Inhibitor | 175 | <chem>C1=C2CC[C@H]3[C@@H]4CC[C@H]([C@@]4C)CC[C@H]3[C@@]2(C)CCC1=O)O</chem>                                                |
| C5018 | PI | Inhibitor | 175 | <chem>C1(=O)CC[C@H]2[C@H]3CC[C@H]4C[C@@H](CC[C@]4(C)[C@H]3CC[C@@]12C)O</chem>                                             |
| C5019 | PI | Inhibitor | 175 | <chem>c12c(c(nc(n2)N(CCO)CCO)N2CCCC2)nc(nc1N1CCCC1)N(CCO)CCO</chem>                                                       |
| C5020 | PI | Inhibitor | 175 | <chem>c1cc2c(c(e1)C(=O)Nc1ccc(cc1)CCCN(Cc1ccc(c(e1)OC)OC)C)[nH]c1ccc(cc1e2=O)OC</chem>                                    |
| C5021 | PI | Inhibitor | 175 | <chem>c12c(c(nc(n2)N2CCCC2)N2CCCC2)nc(nc1N1CCCC1)N(CCO)CCO</chem>                                                         |
| C5022 | PI | Inhibitor | 175 | <chem>c12c(c(nc(n2)N2CCN(CC2)C)N2CCCC2)nc(nc1N1CCCC1)N(CCO)CCO</chem>                                                     |
| C5023 | PI | Inhibitor | 175 | <chem>c12c(c(ncn2)N2CCCC2)nc(nc1N1CCCC1)N(CCO)CCO</chem>                                                                  |
| C5024 | PI | Inhibitor | 175 | <chem>c12c(c(nc(n2)N(CCO)CCO)N2c3cccc3CCC2)nc(nc1N1c2cccc2CCC1)N(CCO)CCO</chem>                                           |
| C5025 | PI | Inhibitor | 175 | <chem>c12c(c(nc(n2)N2CCCC2)N(CCO)CCO)nc(nc1N(CCO)CCO)N1CCCC1</chem>                                                       |
| C5026 | PI | Inhibitor | 175 | <chem>c12c(nc(c3cccc3n2)N2CCCC2)nc(nc1N(CCO)CCO)N1CCCC1</chem>                                                            |
| C5027 | PI | Inhibitor | 175 | <chem>c1ccc(cc1)[C@](CCN1CCCC1)(C1CCCC1)O</chem>                                                                          |
| C5028 | PI | Inhibitor | 175 | <chem>C(#N)c1c([nH]nc1/C(=C\c1cc(c(e1)C(C)C)O)C(C)C)/C#N)N</chem>                                                         |
| C5029 | PI | Inhibitor | 175 | <chem>c1ccc(cc1)C(c1cc(c(e1)CN1CCCC1)O)CN1CCCC1)C</chem>                                                                  |
| C5030 | PI | Inhibitor | 175 | <chem>c1ccc(cc1)CN1[C@H](c2nc3cccc3e(=O)n2[C@@H]1c1ccc(c(e1)O)O)C</chem>                                                  |
| C5031 | PI | Inhibitor | 175 | <chem>c1cc2c(c(e1)C(=O)Nc1ccc(cc1)CCN1Cc3cc(c(cc3CC1)OC)OC)[nH]c1c(cccc1F)c2=O</chem>                                     |
| C5032 | PI | Inhibitor | 175 | <chem>c1ccc(c(e1)C)N1CCN([C@H]2Cc3ccc(cc3CC2)O)CC1</chem>                                                                 |
| C5033 | PI | Inhibitor | 175 | <chem>c1cc(cc2c1C[C@@H]1[C@@H](C)[C@@]2(C)CCN1CC=C(C)C)O</chem>                                                           |
| C5034 | PI | Inhibitor | 175 | <chem>c1cc(ccc1/C(=C/c1ccc(cc1)O)/CC)/CCO</chem>                                                                          |
| C5035 | PI | Inhibitor | 175 | <chem>c1ccc(cc1)CN(CCOC(=O)C1=C(C)NC(=C([C@@H]1c1cccc(c1)[N+](=O)[O-])[P@@](=O)N(C)C)OCC)C</chem>                         |
| C5036 | PI | Inhibitor | 175 | <chem>c1ccc(cc1)CN(c1cccc1)CCOC(=O)C1=C(C)NC(=C([C@@H]1c1cccc(c1)[N+](=O)[O-])P1(=O)OCC(C)C)CO1C</chem>                   |
| C5037 | PI | Inhibitor | 175 | <chem>c1ccc(cc1)CN(c1cccc1)[C@]1(C)[C@H](C(=O)O)[C@H](c2cccc(c2CC)[N+](=O)[O-])C(=C(N)CCN1CCOCC1)P1(=O)OCC(C)C)CO1</chem> |
| C5038 | PI | Inhibitor | 175 | <chem>c1ccc(cc1)[C@H]1[C@H](CCCN1)Nc1cc(ccc1OC)N(C)S(=O)C</chem>                                                          |
| C5039 | PI | Inhibitor | 175 | <chem>c1ccc(cc1)C[C@@H]([C@H](CN(CC(C)C)S(=O)(=O)c1ccc(cc1)N)O)NC(=O)O[C@H]1CCOC1</chem>                                  |
| C5040 | PI | Inhibitor | 175 | <chem>c1ccc(cc1)OCCCN(CCN(CCCOc1cccc1)S(=O)(=O)c1cccc1)S(=O)(=O)c1cccc1</chem>                                            |
| C5041 | PI | Inhibitor | 175 | <chem>c1ccc2c(c1)CCc1cccc1C12c2cccc2CN1C</chem>                                                                           |
| C5042 | PI | Inhibitor | 175 | <chem>c12c(ccc(c1)NS(=O)(=O)C)[nH]c(c2)C(=O)N1CCN(c2cc(cen2)NC(C)C)CC1</chem>                                             |
| C5043 | PI | Inhibitor | 175 | <chem>c1ccc(cc1)CC[C@H](/C=C/S(=O)(=O)c1cccc1)NC(=O)[C@H](Cc1cccc1)NC(=O)N1CCOCC1</chem>                                  |
| C5044 | PI | Inhibitor | 175 | <chem>c12c(cc(cc1)OC)nc([nH]2)[S@](=O)Cc1c(c(en1)C)OC)C</chem>                                                            |
| C5045 | PI | Inhibitor | 175 | <chem>c12c(cccc2)c(ccc1)N(C(=S)Sc1nc2c(cccc2)o1)C</chem>                                                                  |
| C5046 | PI | Inhibitor | 175 | <chem>c1cc(ccc1C)S[C@H](c1ccc(c(e1)OCCc1cnc[nH]1)OC)CCCCCN1Cc2cc(c(cc2CC1)OC)OC</chem>                                    |
| C5047 | PI | Inhibitor | 175 | <chem>c1cc(c(e1)[C@@H](CCCCN1Cc2cc(c(cc2CC1)OC)OC)SC1CCCC1)OC)OC</chem>                                                   |
| C5048 | PI | Inhibitor | 175 | <chem>c1cc(c(e1)[C@@H](CCCCN1Cc2cc(c(cc2CC1)OC)OC)SCCCCC)OC)OC</chem>                                                     |
| C5049 | PI | Inhibitor | 175 | <chem>c1cc(ccc1C)S[C@H](c1ccc(c(e1)OC)OC)CCCCCN1Cc2cc(c(cc2CC1)OC)OC</chem>                                               |
| C5050 | PI | Inhibitor | 175 | <chem>c1cc(ccc1C)S[C@H](c1ccc2c(c1)OCO2)CCCCCN1Cc2cc(c(cc2CC1)OC)OC</chem>                                                |
| C5051 | PI | Inhibitor | 175 | <chem>c1ccc(cc1)C(c1cccc1)SC1CCN(c2nc(nc(n2)NCC=C)NCC=C)CC1</chem>                                                        |
| C5052 | PI | Inhibitor | 175 | <chem>c1cc(ccc1C(c1cccc1)F)N1CCN(c2nc(nc(n2)NCC=C)NCC=C)CC1)F</chem>                                                      |
| C5053 | PI | Inhibitor | 175 | <chem>C(=C(C)C)CC/C(=C/CC/C(=C/CC/C(=C/CSC[C@@H](C(=O)OC)N)/C)/C</chem>                                                   |
| C5054 | PI | Inhibitor | 175 | <chem>C(=C(C)C)CC/C(=C/CC/C(=C/CSC[C@@H](C(=O)N)NC(=O)C)/C</chem>                                                         |
| C5055 | PI | Inhibitor | 175 | <chem>C(=C(C)C)CC/C(=C/CC/C(=C/CSC[C@@H](C(=O)NC)NC(=O)C)/C</chem>                                                        |
| C5056 | PI | Inhibitor | 175 | <chem>C(=C(C)C)CC/C(=C/CC/C(=C/CSC[C@@H](C(=O)OC)NC(=O)C)/C</chem>                                                        |
| C5057 | PI | Inhibitor | 175 | <chem>c1ccc(cc1)SC[C@H]([C@@H](CN1[C@H](C(=O)NC(C)C)C)[C@H]2CCCC[C@H]2C1)O)NC(=O)c1cccc(c1)C</chem>                       |
| C5058 | PI | Inhibitor | 175 | <chem>c1ccc2c(c1)c(=O)n(c(=O)[nH]2)CCCCN1CCN(c2cccc2S)CC1</chem>                                                          |

|       |    |           |     |                                                                                                                             |
|-------|----|-----------|-----|-----------------------------------------------------------------------------------------------------------------------------|
| C5059 | PI | Inhibitor | 175 | c1ccc2c(c1)c(=O)c1cccc(c1[nH]2)C(=O)Nc1ccc(cc1)SCCCN(Cc1ccc(c1)OC)OC)C                                                      |
| C5060 | PI | Inhibitor | 175 | c12c(nc(c(n2)SCc2ccccc2)N(C)C)nc(nc1N(C)C)N1CCNCC1                                                                          |
| C5061 | PI | Inhibitor | 175 | c12c(c(ncn2)SCc2ccccc2)nc(nc1N1CCOCC1)N1CCNCC1                                                                              |
| C5062 | PI | Inhibitor | 175 | C(#N)[C@@](c1ccc(c1)OC)OC)(CCCCCCCCN1Cc2cc(c(cc2CC1)OC)OC)Sc1ccc(cc1)C                                                      |
| C5063 | PI | Inhibitor | 175 | c1cc(ccc1CN1C(=O)N[C@H](N(Cc2ccc(cc2)C1)CC1)SC)C1                                                                           |
| C5064 | PI | Inhibitor | 175 | c12c(cc(c1)OC)OC)[nH]c(c2CCN1CCN(c2ccccc2)CC1)C(=O)OCC                                                                      |
| C5065 | PI | Inhibitor | 175 | C(#N)[C@@](c1ccc(c1)OC)OC)(CCCCCN1Cc2cc(c(cc2CC1)OC)OC)Sc1ccc(cc1)C                                                         |
| C5066 | PI | Inhibitor | 175 | C(#N)[C@@](c1ccc(c1)OC)OC)(CCCCCN1Cc2cc(c(cc2CC1)OC)OC)SC1CCCCC1                                                            |
| C5067 | PI | Inhibitor | 175 | C(#N)[C@](c1ccc(c1)OC)OC)(CCCCCN1Cc2cc(c(cc2CC1)OC)OC)Sc1ccc(cc1)C                                                          |
| C5068 | PI | Inhibitor | 175 | C(#N)[C@@](c1ccc(c1)OC)OC)(CCCCCN1Cc2cc(c(cc2C1)OC)OC)SC1CCCCC1                                                             |
| C5069 | PI | Inhibitor | 175 | C(#N)[C@](c1ccc(c1)OC)OC)(CCCCCN1Cc2cc(c(cc2C1)OC)OC)Sc1ccc(cc1)C                                                           |
| C5070 | PI | Inhibitor | 175 | c1ccc(cc1)C1(CCCN(CCc2ccc(c2)OC)OC)C)S(=O)(=O)CCCS1(=O)=O                                                                   |
| C5071 | PI | Inhibitor | 175 | c1ccc(cc1)NC(=O)OCCN(C(=O)N1c2ccccc2Sc2ccc(cc12)OC)CCOC(=O)Nc1ccccc1                                                        |
| C5072 | PI | Inhibitor | 175 | c1ccc(c1)CC=C)OC[C@@H](CNC(C)C)O                                                                                            |
| C5073 | PI | Inhibitor | 175 | c1ccc2c(c1)N(c1cc(ccc1S2)C(=O)C)[C@@H](C)CN(C)C                                                                             |
| C5074 | PI | Inhibitor | 175 | c1ccc2c(c1)N(c1cc(ccc1S2)OC)C[C@@H](C)CN(C)C                                                                                |
| C5075 | PI | Inhibitor | 175 | c1ccc2c(c1)N(c1cc(ccc1S2)OC)C[C@@H](C)CN1CCC(CC1)O                                                                          |
| C5076 | PI | Inhibitor | 175 | c1ccc2c(c1)N(c1ccccc1S2)C[C@@H](C)CN1CCN(CC1)CCOCCO                                                                         |
| C5077 | PI | Inhibitor | 175 | c1ccc2c(c1)N(c1cc(ccc1S2)C(=O)C)C[C@@H](C)N(C)C                                                                             |
| C5078 | PI | Inhibitor | 175 | c1ccc2c(c1)N(c1ccccc1S2)C[C@@H](C)N(C)C                                                                                     |
| C5079 | PI | Inhibitor | 175 | c1ccc2c(c1)N(c1ccccc1S2)C[C@@H]1C2CCN(CC2)C1                                                                                |
| C5080 | PI | Inhibitor | 175 | c1ccc2c(c1)N(c1cc(ccc1S2)S(=O)(=O)C)CC[C@@H]1CCCCN1C                                                                        |
| C5081 | PI | Inhibitor | 175 | c1ccc2c(c1)N(c1cc(ccc1S2)[S@](=O)C)CC[C@@H]1CCCCN1C                                                                         |
| C5082 | PI | Inhibitor | 175 | c1ccc2c(c1)N(c1cc(ccc1S2)SC)CC[C@@H]1CCCCN1C                                                                                |
| C5083 | PI | Inhibitor | 175 | c1ccc2c(c1)N(c1cc(ccc1S2)C(=O)C)CCCN(C)C                                                                                    |
| C5084 | PI | Inhibitor | 175 | c1ccc2c(c1)N(c1cc(ccc1S2)C(=O)C)CCCN1CCC(C(=O)c2ccc(cc2)F)CC1                                                               |
| C5085 | PI | Inhibitor | 175 | c1ccc2c(c1)N(c1cc(ccc1S2)C(F)(F)F)CCCN1CCC(C(=O)c2ccc(cc2)F)CC1                                                             |
| C5086 | PI | Inhibitor | 175 | c1ccc2c(c1)N(c1cc(ccc1S2)C(F)(F)F)CCCN1CCN(C2CC2)CC1                                                                        |
| C5087 | PI | Inhibitor | 175 | c1ccc2c(c1)N(c1cc(ccc1S2)S(=O)(=O)N(C)C)CCCN1CCN(CC1)C                                                                      |
| C5088 | PI | Inhibitor | 175 | c1ccc2c(c1)N(c1cc(ccc1S2)C(=O)CCC)CCCN1CCN(CC1)C                                                                            |
| C5089 | PI | Inhibitor | 175 | c1ccc2c(c1)N(c1cc(ccc1S2)C(F)(F)F)CCCN1CCN(C2CC2)CC1                                                                        |
| C5090 | PI | Inhibitor | 175 | c1ccc2c(c1)C(=CCCN(C)C)c1ccccc1CC2                                                                                          |
| C5091 | PI | Inhibitor | 175 | c1ccc2c(c1)N(c1cc(ccc1S2)C(=O)C)CCCN1CCN(CC1)CCO                                                                            |
| C5092 | PI | Inhibitor | 175 | c1ccc2c(c1)N(c1cc(ccc1S2)C(=O)CC)CCCN1CCN(CC1)CCO                                                                           |
| C5093 | PI | Inhibitor | 175 | c1ccc2c(c1)N(c1ccccc1S2)CCN1CCCC1                                                                                           |
| C5094 | PI | Inhibitor | 175 | c1cc(c2c(c1)Sc1ccccc1N2)C(=O)Nc1ccc(cc1)OCCN(CCc1ccc(c1)OC)OC)C                                                             |
| C5095 | PI | Inhibitor | 175 | c1ccc2c(c1)C(=C/CCN1CCN(CC1)C)/c1cc(ccc1S2)S(=O)(=O)N(C)C                                                                   |
| C5096 | PI | Inhibitor | 175 | C(#N)c1ccc2c(c1)C1=C(c3ccccc3S2)CCN(CC1)C                                                                                   |
| C5097 | PI | Inhibitor | 175 | c1ccc2c(c1)N=C(c1cc(ccc1S2)C)N1CCN(CC1)C                                                                                    |
| C5098 | PI | Inhibitor | 175 | c1ccc2c(c1)C(=C1CCN(CC1)C)c1ccccc1S2                                                                                        |
| C5099 | PI | Inhibitor | 175 | c1ccc(c1)[C@H]1C(=C(C)NC(=C1C(=O)OCC)COCCN)C(=O)OC)C1                                                                       |
| C5100 | PI | Inhibitor | 175 | c1ccc2c(c1)c(=O)c1cccc(c1s2)C(=O)Nc1ccc(cc1)OCCN(CCc1ccc(c1)OC)OC)C                                                         |
| C5101 | PI | Inhibitor | 175 | c1cc2c(cc1C(F)(F)F)/C(=C/CCN1CCN(CC1)CCO)/c1ccc(cc1S2)F                                                                     |
| C5102 | PI | Inhibitor | 175 | C(#N)[C@H]1C(=S)N(C(=C(C(=O)C)[C@@H]1c1ccc(cc1)OC)c1ccccc1)C1[C@@H]([C@H]([C@@H]([C@@H](COC(=O)C)O1)OC(=O)C)OC(=O)C)OC(=O)C |
| C5103 | PI | Inhibitor | 175 | C(#N)[C@H]1C(=S)N(C(=C[C@@H]1c1ccccc1)c1ccccc1)C1[C@@H]([C@H]([C@@H]([C@@H](COC(=O)C)O1)OC(=O)C)OC(=O)C)OC(=O)C             |
| C5104 | PI | Inhibitor | 175 | C(#N)[C@H]1C(=S)N(C(=C[C@@H]1c1ccccc1)c1ccccc1)C1[C@@H]([C@H]([C@@H]([C@@H](COC(=O)C)O1)OC(=O)C)OC(=O)C)OC(=O)C             |



|       |    |           |     |                                                                                                                 |
|-------|----|-----------|-----|-----------------------------------------------------------------------------------------------------------------|
| C5105 | PI | Inhibitor | 175 | C(#N)c1c(c2ccc(cc2)OC)c2c(CC(C)(C)CC2=O)n(c1=S)C1[C@@H]([C@H]([C@@H]([C@@H](COC(=O)C)O1)OC(=O)C)OC(=O)C)OC(=O)C |
| C5106 | PI | Inhibitor | 175 | c1cc(c(cc1CN1C(=S)NC(=S)N(Cc2ccc(c(c2)OC)OC)CC1)OC)OC                                                           |
| C5107 | PI | Inhibitor | 175 | c1cc(ccc1[N+](=O)[O-])OP(=S)(OC)OC                                                                              |
| C5108 | PI | Inhibitor | 175 | c1ccc2c(c1)CCC1=C(C[Cl+][C=C]1)N2CCCN(C)C                                                                       |
| C5109 | PI | Inhibitor | 175 | c12e3c(ccc1)CCc1ccccc1n3cc2CN(Cc1ccccc1)C                                                                       |
| C5110 | PI | Inhibitor | 175 | c1cc(ccc1C(=C(c1ccc(cc1)OC)CN(C)C)c1ccc(cc1)OC)OC                                                               |
| C5111 | PI | Inhibitor | 175 | c12c(nc(nc1N1CCC(CC1)NCC1c3ccccc3CCc3ccccc13)NCC=C)n(en2)CC=C                                                   |
| C5112 | PI | Inhibitor | 175 | c12een(c1nc(nc2NCC=C)N1CCC(CC1)NCC1c2ccccc2CCc2ccccc12)CC=C                                                     |
| C5113 | PI | Inhibitor | 175 | c12c(nc(nc1NCC=C)N1CCC(CC1)NCC(c1ccccc1)c1ccccc1)n(en2)CC=C                                                     |
| C5114 | PI | Inhibitor | 175 | c12c(nc(nc1NCC=C)N1CCC(CC1)NCC1c3ccccc3CCc3ccccc13)n(en2)CC=C                                                   |
| C5115 | PI | Inhibitor | 175 | c12c(nc(nc1NCC=C)N1CCC(CC1)NCC1c3ccccc3CCc3ccccc13)n(en2)CCC                                                    |
| C5116 | PI | Inhibitor | 175 | c12c(cccc2)c(ccc1)CNC1CCN(c2nc3c(c(n2)NCC=C)nen3CC=C)CC1                                                        |
| C5117 | PI | Inhibitor | 175 | c12c(nc(nc1NCCC)N1CCC(CC1)NCC1c3ccccc3CCc3ccccc13)n(en2)CCC                                                     |
| C5118 | PI | Inhibitor | 175 | c1ccc(cc1)C(c1ccccc1)N1CCN(CC1)/N=C/c1ccc(C)n1                                                                  |
| C5119 | PI | Inhibitor | 175 | c1ccc2c(c1)CCc1ccccc1C2CNC1CCN(c2nc(nc(n2)N(C)C)N(C)C)CC1                                                       |
| C5120 | PI | Inhibitor | 175 | c1ccc2c(c1)CCc1ccccc1C2CNC1CCN(c2nc(nc(n2)NCC=C)NCC)CC1                                                         |
| C5121 | PI | Inhibitor | 175 | c1ccc(cc1)C(c1ccccc1)CN(C1CCN(c2nc(nc(n2)NCC=C)NCC=C)CC1)C                                                      |
| C5122 | PI | Inhibitor | 175 | c1ccc(cc1)C(c1ccccc1)NC1CCN(c2nc(nc(n2)NCC=C)NCC=C)CC1                                                          |
| C5123 | PI | Inhibitor | 175 | c1ccc2c(c1)CCc1ccccc1C2NC1CCN(c2nc(nc(n2)NCC=C)NCC=C)CC1                                                        |
| C5124 | PI | Inhibitor | 175 | c1cc(c(c(c1)C)C(c1c(cccc1C)C)C)CNC1CCN(c2nc(nc(n2)NCC=C)NCC=C)CC1)C                                             |
| C5125 | PI | Inhibitor | 175 | c1ccc(cc1)C(c1ccccc1)CNC1CCN(c2nc(nc(n2)NCC=C)NCC=C)CC1                                                         |
| C5126 | PI | Inhibitor | 175 | c1ccc2c(c1)[C@H]1c3ccccc3[C@]2(CC1)CNC1CCN(c2nc(nc(n2)NCC=C)NCC=C)CC1                                           |
| C5127 | PI | Inhibitor | 175 | c1ccc2c(c1)c1ccccc1C2CNC1CCN(c2nc(nc(n2)NCC=C)NCC=C)CC1                                                         |
| C5128 | PI | Inhibitor | 175 | c1ccc2c(c1)C=Cc1ccccc1C2CNC1CCN(c2nc(nc(n2)NCC=C)NCC=C)CC1                                                      |
| C5129 | PI | Inhibitor | 175 | c1ccc2c(c1)CCc1ccccc1C2CNC1CCN(c2nc(nc(n2)NCC=C)NCC=C)CC1                                                       |
| C5130 | PI | Inhibitor | 175 | c1ccc(cc1)C(c1ccccc1)CCNC1CCN(c2nc(nc(n2)NCC=C)NCC=C)CC1                                                        |
| C5131 | PI | Inhibitor | 175 | c1cc(ccc1C(c1ccc(cc1)F)CCCN1CCN(C(=O)NCC)CC1)F                                                                  |
| C5132 | PI | Inhibitor | 175 | c1ccc2c(c1)CCc1ccccc1C2CN1CCN(c2nc(nc(n2)NCC=C)NCC=C)CC1                                                        |
| C5133 | PI | Inhibitor | 175 | c1ccc2c(c1)CCc1ccccc1C2CNN1CCN(c2nc(nc(n2)NCC=C)NCC=C)CC1                                                       |
| C5134 | PI | Inhibitor | 175 | c1ccc(cc1)C(c1ccccc1)CNC1CCN(c2nc(nc(n2)NCCC)NCC=C)CC1                                                          |
| C5135 | PI | Inhibitor | 175 | c1ccc2c(c1)CCc1ccccc1C2CNC1CCN(c2nc(nc(n2)NCCC)NCC=C)CC1                                                        |
| C5136 | PI | Inhibitor | 175 | c1ccc(cc1)C(c1ccccc1)CCNC1CCN(c2nc(nc(n2)NCCC)NCC=C)CC1                                                         |
| C5137 | PI | Inhibitor | 175 | c1ccc(cc1)C1=Ne2ccenc2N(c2ccccc12)CCCN(C)C                                                                      |
| C5138 | PI | Inhibitor | 175 | c12c(ccc(c1)CN1CCN(C(c3ccccc3)c3ccccc3)CC1)n(c(CCCC)n2)CC                                                       |
| C5139 | PI | Inhibitor | 175 | c1ccnc(c1)/C(=C/CN1CCCC1)/c1ccc(cc1)C                                                                           |
| C5140 | PI | Inhibitor | 175 | c1ccc2c(c1)C(=C(C2)CCN(C)C)[C@H](c1ccccc1)C                                                                     |
| C5141 | PI | Inhibitor | 175 | c1ccc(cc1)c1ccc(cc1)[C@H](c1ccccc1)n1ccn1                                                                       |
| C5142 | PI | Inhibitor | 175 | C1=C2CC(=O)CC[C@]2(C)[C@H]2CC[C@]3(C(=O)CC[C@H]3[C@H]2C1)C                                                      |
| C5143 | PI | Inhibitor | 175 | c12c(c(ccc1)CC)oc(e2)[C@H](CNC(C)(C)C)O                                                                         |
| C5144 | PI | Inhibitor | 175 | c12c(cccc1)oc(e2CCc1ccccc1)C(=O)CN1CCN(c2ccccc2OC)CC1                                                           |
| C5145 | PI | Inhibitor | 175 | c12c(cccc1)oc(e2CCc1ccccc1)[C@H](CN1CCN(c2ccccc2OC)CC1)O                                                        |
| C5146 | PI | Inhibitor | 175 | c12c(cccc1)oc(e2CCc1ccccc1)CCNC(C)C                                                                             |
| C5147 | PI | Inhibitor | 175 | c1ccc(cc1)C(c1ccccc1)Cc1nc(CCN2CCCCC2)on1                                                                       |
| C5148 | PI | Inhibitor | 175 | c12c(c(ccc1)[C@H]1C(=C(C)NC(=C1C(=O)OC(C)C)C(=O)OC)non2                                                         |
| C5149 | PI | Inhibitor | 175 | c12c(c(ccc1)C1C(=C(C)NC(=C1C(=O)OCC)C)C(=O)OCC)non2                                                             |
| C5150 | PI | Inhibitor | 175 | c1ccc2c(c1)C(=C1CCN(CC1)C)c1ccse1CC2                                                                            |









|       |    |              |     |                                                                                 |
|-------|----|--------------|-----|---------------------------------------------------------------------------------|
| C5335 | PI | Noninhibitor | 175 | c1ccc(c(c1)c1ccc(cc1)Cn1c(c(nc1CCCC)Cl)CO)c1n[nH]nn1                            |
| C5336 | PI | Noninhibitor | 175 | C1=C[C@H](C)C(CC[C@H])(C[C@H](CC(=O)O)O)[C@@H]2C1=CC(C)CC2OC(=O)[C@@H](C)CC     |
| C5337 | PI | Noninhibitor | 175 | c1cc(c(cc1c1cc(=O)c2c(cc2o1)O)O)OC1[C@@H](C([C@@H](C(CO)O1)O)O)                 |
| C5338 | PI | Noninhibitor | 175 | c1ccc(cc1)C1(c2ccccc2)C(=O)N(C(=O)N1)CC(=O)O                                    |
| C5339 | PI | Noninhibitor | 175 | c1ccc(cc1)C1(c2ccccc2)C(=O)N(C(=O)N1)CCC(=O)O                                   |
| C5340 | PI | Noninhibitor | 175 | c1ccc(cc1)C1(c2ccccc2)C(=O)N(CC(=O)O)[C@H](C)N1                                 |
| C5341 | PI | Noninhibitor | 175 | c12c(cc2)Cl)nc(cc1)/C=C/c1ccc(c1)[C@H](SCCC(=O)N(CC)CC)SCCC(=O)O                |
| C5342 | PI | Noninhibitor | 175 | c1ccc2c(c1)C1=C(c3ccccc3O2)CCN(CC1)C                                            |
| C5343 | PI | Noninhibitor | 175 | c1ccc(cc1)[C@](c1ccc(cc1)Cl)(C)O[C@H](C)CN(C)C                                  |
| C5344 | PI | Noninhibitor | 175 | c1cc(ccc1C(=O)O)CCNC(=O)c1cc(ccc1OC)Cl                                          |
| C5345 | PI | Noninhibitor | 175 | c1ccc2c(c1)C(=NCC2)COc1ccc(cc1)OC                                               |
| C5346 | PI | Noninhibitor | 175 | c1ccc(cc1)CC(C)(C)NC                                                            |
| C5347 | PI | Noninhibitor | 175 | C(=O)(N)OCC(C)(CCC)COC(=O)N                                                     |
| C5348 | PI | Noninhibitor | 175 | c1cc(ccc1C(c1ccc(cc1)OC)C(Cl)(Cl)Cl)OC                                          |
| C5349 | PI | Noninhibitor | 175 | C(=O)(C)OCCOC                                                                   |
| C5350 | PI | Noninhibitor | 175 | c1c(c(cc1Cl)N)OC)C(=O)NCCN(CC)CC                                                |
| C5351 | PI | Noninhibitor | 175 | c1cc(c(c1)C)OC[C@@H](C)N)C                                                      |
| C5352 | PI | Noninhibitor | 175 | c1(c(nc1c1)NC)N1CCN(CC1)C)SC                                                    |
| C5353 | PI | Noninhibitor | 175 | c1ccc2c(c1)Cc1ccccc1N1[C@H]2CN(CC1)C                                            |
| C5354 | PI | Noninhibitor | 175 | c1cc(cc1[C@H](Cn1ccnc1)OCc1ccc(cc1Cl)Cl)Cl                                      |
| C5355 | PI | Noninhibitor | 175 | C12(C3(C4(C5(C(C1(C4(Cl)Cl)Cl)(C2(C(C35Cl)(Cl)Cl)Cl)Cl)Cl)Cl)Cl)Cl              |
| C5356 | PI | Noninhibitor | 175 | C1(=C(C(=O)C2=C(C1=O)N1[C@@]([C@@H]2COC(=O)N)([C@@H]2[C@H](C1)N2)OC)N)          |
| C5357 | PI | Noninhibitor | 175 | c1cc(c(cc1CC=N/C1/CCCN1C)OC)OC                                                  |
| C5358 | PI | Noninhibitor | 174 | O[C@H](COc1ccc(cc1)NC(=O)C)CNC(C)C                                              |
| C5359 | PI | Inhibitor    | 174 | COc1ccc(CCN(C)CC#CCN2C(=O)[C@H]3[C@H](C4c5ccccc5C3c3ccccc43)C2=O)cc1OC          |
| C5360 | PI | Inhibitor    | 174 | COc1ccc(CCN(C)CCCN2C(=O)[C@H]3[C@H](C4c5ccccc5C3c3ccccc43)C2=O)cc1OC            |
| C5361 | PI | Inhibitor    | 174 | COc1ccc(CCN(C)CCN2C(=O)[C@H]3[C@H](C4c5ccccc5C3c3ccccc43)C2=O)cc1OC             |
| C5362 | PI | Inhibitor    | 174 | CCCCCCC[C@@H]1[C@@H](C(=O)O[C@H](C(=O)N([C@H](C(CC(=O)O1)OCOC)Cc1ccccc1)C)C(C)C |
| C5363 | PI | Inhibitor    | 174 | CC1COC(=O)C[C@H]([C@@H](N(C(=O)[C@@H](OC1=O)C(C)C)Cc1ccccc1)O                   |
| C5364 | PI | Inhibitor    | 174 | CC1COC(=O)C[C@H]([C@H](N(C(=O)[C@@H](OC1=O)C(C)C)Cc1ccccc1)OCOC                 |
| C5365 | PI | Inhibitor    | 174 | CCCCCCC[C@@H]1[C@@H](C(=O)O[C@H](C(=O)N([C@H](CCC(=O)O1)Cc1ccccc1)C)C(C)C       |
| C5366 | PI | Inhibitor    | 174 | CCCCCCC[C@@H]1[C@@H](C(=O)O[C@H](C(=O)N([C@H](C(CC(=O)O1)O)Cc1ccccc1)C)C(C)C    |
| C5367 | PI | Inhibitor    | 174 | CCCCCCC[C@@H]1[C@@H](C(=O)OC(C(=O)N([C@H](C(CC(=O)O1)O)Cc1ccccc1)C)C(C)C        |
| C5368 | PI | Inhibitor    | 174 | CCCCCCC[C@@H]1[C@@H](C(=O)OC(C(=O)N([C@H](C(CC(=O)O1)OCOC)Cc1ccccc1)C)C(C)C     |
| C5369 | PI | Inhibitor    | 174 | CCCC[C@@H]1[C@@H](C(=O)OCC(=O)N([C@H](C(CC(=O)O1)O)Cc1ccccc1)C)C                |
| C5370 | PI | Inhibitor    | 174 | CCCCCCC[C@@H]1[C@@H](C(=O)O[C@H](C(=O)N([C@H](C(CC(=O)O1)O)Cc1ccccc1)C)C(C)C    |
| C5371 | PI | Inhibitor    | 174 | CCCC[C@@H]1[C@@H](C(=O)OCC(=O)N([C@H](C(CC(=O)O1)OCOC)Cc1ccccc1)C)C             |
| C5372 | PI | Inhibitor    | 174 | CN([C@@H](Cc1ccccc1)[C@@H](CC(=O)OC)OCOC)C(=O)OCc1ccccc1                        |
| C5373 | PI | Inhibitor    | 174 | CN([C@@H](Cc1ccccc1)[C@@H](CC(=O)OC)O)C(=O)OCc1ccccc1                           |
| C5374 | PI | Inhibitor    | 174 | CCCCCCC[C@@H]([C@H](C)C(=O)O[C@@H](C(C)C)C(=O)OC)O                              |
| C5375 | PI | Inhibitor    | 174 | CCCCCCC[C@@H]1[C@@H](C(=O)O[C@H](C(=O)N([C@H](C(CC(=O)O1)OCOC)Cc1ccccc1)C)C(C)C |
| C5376 | PI | Inhibitor    | 174 | CCCCCCC[C@@H]1[C@@H](C(=O)OCC(=O)N([C@H](C(CC(=O)O1)O)Cc1ccccc1)C)C             |
| C5377 | PI | Inhibitor    | 174 | CCCCCCC[C@@H]1[C@@H](C(=O)OCC(=O)N([C@H](C(CC(=O)O1)OCOC)Cc1ccccc1)C)C          |
| C5378 | PI | Inhibitor    | 174 | CCCCCCCC1CC(=O)O[C@H](C(=O)N([C@H](C(CC(=O)O1)O)Cc1ccccc1)C)C(C)C               |
| C5379 | PI | Inhibitor    | 174 | CCCCCCCC1CC(=O)O[C@H](C(=O)N([C@H](C(CC(=O)O1)OCOC)Cc1ccccc1)C)C(C)C            |
| C5380 | PI | Inhibitor    | 174 | C[C@H]1[C@H](OC(=O)C[C@H]([C@@H](N(C(=O)[C@@H](OC1=O)C(C)C)Cc1ccccc1)O)C        |

|       |    |              |     |                                                                                           |
|-------|----|--------------|-----|-------------------------------------------------------------------------------------------|
| C5381 | PI | Inhibitor    | 174 | <chem>C[C@H]1[C@H](OC(=O)C[C@H]([C@@H](N(C(=O)[C@@H](OC1=O)C(C)C)C)Cc1cccc1)OCOC)C</chem> |
| C5382 | PI | Inhibitor    | 174 | <chem>c1ccc2c(c1)c(=O)c1cccc1n2CCCCN1CCCC1</chem>                                         |
| C5383 | PI | Inhibitor    | 174 | <chem>COc1cccc2c1n(c1cccc1c2=O)CCCCN1CCCC1</chem>                                         |
| C5384 | PI | Noninhibitor | 174 | <chem>O[C@H]1CC[C@H]2CN3CCc4c([nH]c5ccccc45)[C@H]3C[C@@H]2C1C(=O)OC</chem>                |
| C5385 | PI | Inhibitor    | 174 | <chem>c1ccc2c(c1)c(=O)c1cccc1n2CCCCN1CCOCC1</chem>                                        |
| C5386 | PI | Inhibitor    | 174 | <chem>COc1cccc2c1n(c1cccc1c2=O)CCCCN1CCOCC1</chem>                                        |
| C5387 | PI | Inhibitor    | 174 | <chem>c1ccc2c(c1)c(=O)c1cccc1n2CCCCN(CCO)CCO</chem>                                       |
| C5388 | PI | Inhibitor    | 174 | <chem>COc1cccc2c1n(c1cccc1c2=O)CCCCN(CCO)CCO</chem>                                       |
| C5389 | PI | Inhibitor    | 174 | <chem>c1ccc2c(c1)c(=O)c1cccc1n2CCCCN1CCN(CC1)CCO</chem>                                   |
| C5390 | PI | Inhibitor    | 174 | <chem>COc1cccc2c1n(c1cccc1c2=O)CCCCN1CCN(CC1)CCO</chem>                                   |
| C5391 | PI | Inhibitor    | 174 | <chem>COc1cccc2c1[nH]c1cccc1c2=O</chem>                                                   |
| C5392 | PI | Inhibitor    | 174 | <chem>c1ccc2c(c1)c(=O)c1cccc1n2CCCC1</chem>                                               |
| C5393 | PI | Inhibitor    | 174 | <chem>COc1cccc2c1n(c1cccc1c2=O)CCCC1</chem>                                               |
| C5394 | PI | Inhibitor    | 174 | <chem>CN1CCN(CC1)CCc1c2cccc2c(=O)c2c1ccc2</chem>                                          |
| C5395 | PI | Inhibitor    | 174 | <chem>CN1CCN(CC1)CCc1c2cccc2c(=O)c2c1c(ccc2)OC</chem>                                     |
| C5396 | PI | Inhibitor    | 174 | <chem>c1ccc2c(c1)c(=O)c1cccc1n2CCCN1CCCC1</chem>                                          |
| C5397 | PI | Inhibitor    | 174 | <chem>COc1cccc2c1n(c1cccc1c2=O)CCCN1CCCC1</chem>                                          |
| C5398 | PI | Inhibitor    | 174 | <chem>c1ccc2c(c1)c(=O)c1cccc1n2CCCN1CCOCC1</chem>                                         |
| C5399 | PI | Inhibitor    | 174 | <chem>COc1cccc2c1n(c1cccc1c2=O)CCCN1CCOCC1</chem>                                         |
| C5400 | PI | Inhibitor    | 174 | <chem>c1ccc2c(c1)c(=O)c1cccc1n2CCCN(CCO)CCO</chem>                                        |
| C5401 | PI | Inhibitor    | 174 | <chem>COc1cccc2c1n(c1cccc1c2=O)CCCN(CCO)CCO</chem>                                        |
| C5402 | PI | Inhibitor    | 174 | <chem>c1ccc2c(c1)c(=O)c1cccc1n2CCCN1CCN(CC1)CCO</chem>                                    |
| C5403 | PI | Inhibitor    | 174 | <chem>COc1cccc2c1n(c1cccc1c2=O)CCCN1CCN(CC1)CCO</chem>                                    |
| C5404 | PI | Inhibitor    | 174 | <chem>c1ccc2c(c1)c(=O)c1cccc1n2CCCC1</chem>                                               |
| C5405 | PI | Inhibitor    | 174 | <chem>COc1cccc2c1n(c1cccc1c2=O)CCCC1</chem>                                               |
| C5406 | PI | Inhibitor    | 174 | <chem>CN1CCN(CC1)CCc1c2cccc2c(=O)c2c1ccc2</chem>                                          |
| C5407 | PI | Inhibitor    | 174 | <chem>CN1CCN(CC1)CCc1c2cccc2c(=O)c2c1c(ccc2)OC</chem>                                     |
| C5408 | PI | Inhibitor    | 174 | <chem>CN(C)c1ccc(cc1)c1c([nH]c(n1)c1ccc(cc1)CCC(=O)OC)c1ccc(cc1)N(C)C</chem>              |
| C5409 | PI | Inhibitor    | 174 | <chem>CN(C)c1ccc(cc1)c1c([nH]c(n1)c1ccc(cc1)/C=C/C#N)c1ccc(cc1)N(C)C</chem>               |
| C5410 | PI | Inhibitor    | 174 | <chem>CN(C)c1ccc(cc1)c1c([nH]c(n1)c1ccc(cc1)/C=C/COC)c1ccc(cc1)N(C)C</chem>               |
| C5411 | PI | Inhibitor    | 174 | <chem>CN(C)c1ccc(cc1)c1c([nH]c(n1)c1ccc(cc1)CCOC)c1ccc(cc1)N(C)C</chem>                   |
| C5412 | PI | Inhibitor    | 174 | <chem>CN(C)c1ccc(cc1)c1c([nH]c(n1)c1ccc(cc1)C(=O)OC)c1ccc(cc1)N(C)C</chem>                |
| C5413 | PI | Inhibitor    | 174 | <chem>CN(C)c1ccc(cc1)c1c([nH]c(n1)c1ccc(cc1)CCCCOC)c1ccc(cc1)N(C)C</chem>                 |
| C5414 | PI | Inhibitor    | 174 | <chem>CN(C)c1ccc(cc1)c1c([nH]c(n1)c1ccc(cc1)[C@@H]1C[C@@H]1C(=O)OC)c1ccc(cc1)N(C)C</chem> |
| C5415 | PI | Inhibitor    | 174 | <chem>CCCCOC/C=C/c1ccc(cc1)c1[nH]c(c(n1)c1ccc(cc1)N(C)C)c1ccc(cc1)N(C)C</chem>            |
| C5416 | PI | Inhibitor    | 174 | <chem>CN(C)c1ccc(cc1)c1c([nH]c(n1)c1ccc(cc1)/C=C/COCCOC)c1ccc(cc1)N(C)C</chem>            |
| C5417 | PI | Inhibitor    | 174 | <chem>CN(C)c1ccc(cc1)c1c([nH]c(n1)c1ccc(cc1)/C=C/COCc1cccc1)c1ccc(cc1)N(C)C</chem>        |
| C5418 | PI | Inhibitor    | 174 | <chem>CN(C)c1ccc(cc1)c1c([nH]c(n1)c1ccc(cc1)/C=C/COc1cccc1)c1ccc(cc1)N(C)C</chem>         |
| C5419 | PI | Inhibitor    | 174 | <chem>CCN(CC)C(=O)OC/C=C/c1ccc(cc1)c1[nH]c(c(n1)c1ccc(cc1)N(C)C)c1ccc(cc1)N(C)C</chem>    |
| C5420 | PI | Inhibitor    | 174 | <chem>CCCCC(=O)OC/C=C/c1ccc(cc1)c1[nH]c(c(n1)c1ccc(cc1)N(C)C)c1ccc(cc1)N(C)C</chem>       |
| C5421 | PI | Inhibitor    | 174 | <chem>CN(C)C/C=C/c1ccc(cc1)c1[nH]c(c(n1)c1ccc(cc1)N(C)C)c1ccc(cc1)N(C)C</chem>            |
| C5422 | PI | Inhibitor    | 174 | <chem>CN(C)c1ccc(cc1)c1c([nH]c(n1)c1ccc(cc1)/C=C/CN1CCCCC1)c1ccc(cc1)N(C)C</chem>         |
| C5423 | PI | Inhibitor    | 174 | <chem>CCCCCN1c(c(nc1c1ccc(cc1)C(=O)O)c1ccc(cc1)N(C)C)c1ccc(cc1)N(C)C</chem>               |
| C5424 | PI | Inhibitor    | 174 | <chem>CN(C)c1ccc(cc1)c1c([nH]c(n1)c1ccc(cc1)/C=C/CN1CCOCC1)c1ccc(cc1)N(C)C</chem>         |
| C5425 | PI | Inhibitor    | 174 | <chem>CCCCCN1c(c(nc1c1ccc(cc1)C(=O)OC)c1ccc(cc1)N(C)C)c1ccc(cc1)N(C)C</chem>              |
| C5426 | PI | Inhibitor    | 174 | <chem>CN(C)c1ccc(cc1)c1c([nH]c(n1)c1ccc(cc1)/C=C/C(=O)O)c1ccc(cc1)N(C)C</chem>            |

|       |    |           |     |                                                                                                              |
|-------|----|-----------|-----|--------------------------------------------------------------------------------------------------------------|
| C5427 | PI | Inhibitor | 174 | CN(C)c1ccc(cc1)c1c([nH]e(n1)c1ccc(cc1)/C=C/C(=O)OC)c1ccc(cc1)N(C)C                                           |
| C5428 | PI | Inhibitor | 174 | CN(C)c1ccc(cc1)c1c([nH]e(n1)c1ccc(cc1)O)c1ccc(cc1)N(C)C                                                      |
| C5429 | PI | Inhibitor | 174 | CN(C)c1ccc(cc1)c1c(n(c(n1)c1ccc(cc1)O)CCc1cccc1)c1ccc(cc1)N(C)C                                              |
| C5430 | PI | Inhibitor | 174 | CN(C)c1ccc(cc1)c1c(n(c(n1)c1ccc(cc1)C(=O)O)CCc1cccc1)c1ccc(cc1)N(C)C                                         |
| C5431 | PI | Inhibitor | 174 | CCN(CC)c1ccc(cc1)c1c([nH]e(n1)c1ccc(cc1)/C=C/C(=O)OC)c1ccc(cc1)N                                             |
| C5432 | PI | Inhibitor | 174 | CNe1ccc(cc1)c1c([nH]e(n1)c1ccc(cc1)/C=C/C(=O)OC)c1ccc(cc1)NC                                                 |
| C5433 | PI | Inhibitor | 174 | CC(C)Ne1ccc(cc1)c1c([nH]e(n1)c1ccc(cc1)/C=C/C(=O)OC)c1ccc(cc1)NC                                             |
| C5434 | PI | Inhibitor | 174 | CCOC/C=C/c1ccc(cc1)c1[nH]c(c(n1)c1ccc(cc1)N(C)C)c1ccc(cc1)N(C)C                                              |
| C5435 | PI | Inhibitor | 174 | CCN(CC)c1ccc(cc1)c1c([nH]e(n1)c1ccc(cc1)/C=C/COCC)c1ccc(cc1)N(CC)CC                                          |
| C5436 | PI | Inhibitor | 174 | CCOC/C=C/c1ccc(cc1)c1[nH]c(c(n1)c1ccc(cc1)N1CCOCC1)c1ccc(cc1)N1CCOCC1                                        |
| C5437 | PI | Inhibitor | 174 | CCOC/C=C/c1ccc(cc1)c1[nH]c(c(n1)c1ccc(cc1)NC)c1ccc(cc1)N(C)C                                                 |
| C5438 | PI | Inhibitor | 174 | CCN(CC)c1ccc(cc1)c1c([nH]e(n1)c1ccc(cc1)/C=C/COCC)c1ccc(cc1)NC                                               |
| C5439 | PI | Inhibitor | 174 | CCOC/C=C/c1ccc(cc1)c1[nH]c(c(n1)c1ccc(cc1)NC)c1ccc(cc1)N1CCCC1                                               |
| C5440 | PI | Inhibitor | 174 | CCOC/C=C/c1ccc(cc1)c1[nH]c(c(n1)c1ccc(cc1)NC)c1ccc(cc1)NC(C)C                                                |
| C5441 | PI | Inhibitor | 174 | CCN(CC)c1ccc(cc1)c1c([nH]e(n1)c1ccc(cc1)/C=C/C(=O)OC)c1ccc(cc1)N(CC)CC                                       |
| C5442 | PI | Inhibitor | 174 | CCNe1ccc(cc1)c1c([nH]e(n1)c1ccc(cc1)/C=C/COCC)c1ccc(cc1)NC(C)C                                               |
| C5443 | PI | Inhibitor | 174 | CCOC/C=C/c1ccc(cc1)c1[nH]c(c(n1)c1ccc(cc1)F)c1ccc(cc1)NC(C)C                                                 |
| C5444 | PI | Inhibitor | 174 | CCN(CC)c1ccc(cc1)c1c([nH]e(n1)c1ccc(cc1)/C=C/COCC                                                            |
| C5445 | PI | Inhibitor | 174 | CCCN(CCC)c1ccc(cc1)c1c([nH]e(n1)c1ccc(cc1)/C=C/COCC                                                          |
| C5446 | PI | Inhibitor | 174 | CCOC/C=C/c1ccc(cc1)c1[nH]c(en1)c1ccc(cc1)N1CCOCC1                                                            |
| C5447 | PI | Inhibitor | 174 | CCOC/C=C/c1ccc(cc1)c1[nH]c(en1)c1ccc(cc1)NC(C)C                                                              |
| C5448 | PI | Inhibitor | 174 | CCOC/C=C/c1ccc(cc1)c1[nH]c(en1)c1ccc(cc1)NCC(C)C                                                             |
| C5449 | PI | Inhibitor | 174 | COC(=O)/C=C/c1ccc(cc1)c1[nH]c(c(n1)c1ccc(cc1)N1CCCC1)c1ccc(cc1)N1CCCC1                                       |
| C5450 | PI | Inhibitor | 174 | COC(=O)/C=C/c1ccc(cc1)c1[nH]c(c(n1)c1ccc(cc1)N(CC=C)CC=C)c1ccc(cc1)N(CC=C)CC=C                               |
| C5451 | PI | Inhibitor | 174 | CNe1ccc(cc1)c1c([nH]e(n1)c1ccc(cc1)/C=C/C(=O)OC)c1ccc(cc1)N(C)C                                              |
| C5452 | PI | Inhibitor | 174 | CCN(CC)c1ccc(cc1)c1c([nH]e(n1)c1ccc(cc1)/C=C/C(=O)OC)c1ccc(cc1)NC                                            |
| C5453 | PI | Inhibitor | 174 | CCCN(CCC)c1ccc(cc1)c1c([nH]e(n1)c1ccc(cc1)/C=C/C(=O)OC)c1ccc(cc1)NC                                          |
| C5454 | PI | Inhibitor | 174 | O[C@]12O[C@@](NC(=O)[C@@H]3CN(C)[C@@H]4C5c(Br)[nH]e6cccc(c56)C4=C3)(C(C)C)C(=O)N1[C@@H](CC(C)C)C(=O)N1CCCC21 |
| C5455 | PI | Inhibitor | 174 | CCCCN(CCCC)c1ccc(cc1)c1c([nH]e(n1)c1ccc(cc1)/C=C/C(=O)OC)c1ccc(cc1)NC                                        |
| C5456 | PI | Inhibitor | 174 | CN(C)c1ccc(cc1)c1c([nH]e(n1)c1ccc(cc1)/C=C/C(=O)OC)c1ccc(cc1)N                                               |
| C5457 | PI | Inhibitor | 174 | O=C(N[C@@H]1CCCC[C@@H]1N1CCN(CC1)c1cccc1)c1cccc1NC(=O)c1enc2cccc2c1                                          |
| C5458 | PI | Inhibitor | 174 | COe1cc2CCN(CCc3ccc(NC(=O)c4cccc4[N+](=O)[O-])cc3)Cc2cc1OC                                                    |
| C5459 | PI | Inhibitor | 174 | [O-][N+](=O)c1cccc1C(=O)Ne1ccc(CCN2CCc3cccc3C2)cc1                                                           |
| C5460 | PI | Inhibitor | 174 | COe1cc2CCN(CCc3ccc(NC(=O)c4cccc4N)cc3)Cc2cc1OC                                                               |
| C5461 | PI | Inhibitor | 174 | Ne1cccc1C(=O)Ne1ccc(CCN2CCc3cccc3C2)cc1                                                                      |
| C5462 | PI | Inhibitor | 174 | COe1cc2CCN(CCc3ccc(NC(=O)c4ccc(cc4)[N+](=O)[O-])cc3)Cc2cc1OC                                                 |
| C5463 | PI | Inhibitor | 174 | [O-][N+](=O)c1ccc(cc1)C(=O)Ne1ccc(CCN2CCc3cccc3C2)cc1                                                        |
| C5464 | PI | Inhibitor | 174 | COe1cc2CCN(CCc3ccc(NC(=O)c4ccc(N)cc4)cc3)Cc2cc1OC                                                            |
| C5465 | PI | Inhibitor | 174 | Ne1ccc(cc1)C(=O)Ne1ccc(CCN2CCc3cccc3C2)cc1                                                                   |
| C5466 | PI | Inhibitor | 174 | COe1cc2CCN(CCc3ccc(NC(=O)c4cnc5cccc5c4)cc3)Cc2cc1OC                                                          |
| C5467 | PI | Inhibitor | 174 | O=C(Ne1ccc(CCN2CCc3cccc3C2)cc1)c1enc2cccc2c1                                                                 |
| C5468 | PI | Inhibitor | 174 | COe1ccc(cc1OC)C(=O)Ne1ccc(CCN2CCc3cc(OC)c(OC)cc3C2)cc1                                                       |
| C5469 | PI | Inhibitor | 174 | COe1cc2CCN(CCc3ccc(NC(=O)c4ccc(OC)c(OC)cc4[N+](=O)[O-])cc3)Cc2cc1OC                                          |
| C5470 | PI | Inhibitor | 174 | COe1cc2CCN(CCc3ccc(NC(=O)c4cnc5cccc45)cc3)Cc2cc1OC                                                           |
| C5471 | PI | Inhibitor | 174 | COe1cc2CCN(CCc3ccc(NC(=O)c4cccc4Br)cc3)Cc2cc1OC                                                              |
| C5472 | PI | Inhibitor | 174 | COe1cc2CCN(CCc3ccc(NC(=O)c4cccc(Br)c4)cc3)Cc2cc1OC                                                           |



|       |    |              |     |                                                                                                                              |
|-------|----|--------------|-----|------------------------------------------------------------------------------------------------------------------------------|
| C5473 | PI | Noninhibitor | 174 | OC(=O)COCCN1CCN(CC1)[C@@H](c1cccc1)c1ccc(Cl)cc1                                                                              |
| C5474 | PI | Inhibitor    | 174 | COe1cc2CCN(CCe3ccc(NC(=O)c4cccc5ccccc45)cc3)Ce2cc1OC                                                                         |
| C5475 | PI | Inhibitor    | 174 | COe1cc2CCN(CCe3ccc(NC(=O)c4ccc5ccccc5c4)cc3)Ce2cc1OC                                                                         |
| C5476 | PI | Inhibitor    | 174 | COe1cc2CCN(CCe3ccc(NC(=O)c4cnc5ccccc5n4)cc3)Ce2cc1OC                                                                         |
| C5477 | PI | Inhibitor    | 174 | COe1cc2CCN(CCe3ccc(NC(=O)c4ccc5ccccc5cn4)cc3)Ce2cc1OC                                                                        |
| C5478 | PI | Inhibitor    | 174 | COe1cc2CCN(CCe3ccc(NC(=O)c4cccnc4)cc3)Ce2cc1OC                                                                               |
| C5479 | PI | Inhibitor    | 174 | COe1cc2CCN(CCe3ccc(NC(=O)c4ccc(Br)cc4)cc3)Ce2cc1OC                                                                           |
| C5480 | PI | Inhibitor    | 174 | COe1cc2CCN(CCe3ccc(NC(=O)c4ccc5ncccc5c4)cc3)Ce2cc1OC                                                                         |
| C5481 | PI | Inhibitor    | 174 | COe1cc2CCN(CCe3ccc(NC(=O)c4cccc4NC(=O)c4ccc(C)cc4)cc3)Ce2cc1OC                                                               |
| C5482 | PI | Inhibitor    | 174 | O=C(Nc1cccc1C(=O)Nc1ccc(CCN2CCc3ccccc3C2)cc1)c1cnc2ccccc2c1                                                                  |
| C5483 | PI | Noninhibitor | 174 | C1NCCN(C1)Cc1ccccc1                                                                                                          |
| C5484 | PI | Noninhibitor | 174 | C1NCc1ccccc1Cl                                                                                                               |
| C5485 | PI | Noninhibitor | 174 | CCN(CC)CCOC(=O)C(c1ccccc1)c1ccccc1                                                                                           |
| C5486 | PI | Noninhibitor | 174 | CN(C)CCCOCl(CCCCC1)Cc1ccccc1                                                                                                 |
| C5487 | PI | Noninhibitor | 174 | C[C@H](NC1=C(C=C1)O)[C@@H](Cc1ccc(Cl)cc1)c1ccc(Cl)cc1                                                                        |
| C5488 | PI | Noninhibitor | 174 | COe1c(OC)cc/C=C/C2=C(CN3CCN2CC3)N2CCCC2)cc1OC                                                                                |
| C5489 | PI | Noninhibitor | 174 | COe1c(OC)cc/C=C/C2=C(NC(C)C)CN3CCN2CC3)cc1OC                                                                                 |
| C5490 | PI | Noninhibitor | 174 | N(C1=NCCN1)c1c(Cl)ccccc1Cl                                                                                                   |
| C5491 | PI | Noninhibitor | 174 | COC1CC2CC3N(CCC4CC(OC)C(OC)CC34)C(C)C2CC1OC                                                                                  |
| C5492 | PI | Noninhibitor | 174 | CC(c1ccc(OC#N)cc1)c1ccc(OC#N)cc1                                                                                             |
| C5493 | PI | Noninhibitor | 174 | [N]=C(N)N/N=C/c1c(Cl)ccccc1Cl                                                                                                |
| C5494 | PI | Noninhibitor | 174 | OC(=O)CN1C2=C1C(N2)(c1ccccc1)c1ccccc1                                                                                        |
| C5495 | PI | Noninhibitor | 174 | COe1ccc(cc1)C(OCCN(C)C)c1ccccc1                                                                                              |
| C5496 | PI | Noninhibitor | 174 | COe1ccc(cc1)OC1=NCc2ccccc12                                                                                                  |
| C5497 | PI | Noninhibitor | 174 | [N]=C(N)NC(=O)Cc1c(Cl)ccccc1Cl                                                                                               |
| C5498 | PI | Noninhibitor | 174 | COCCNCc1cc(OC)c(OC)c(OC)c1                                                                                                   |
| C5499 | PI | Noninhibitor | 174 | c1(NC)c(NCC[C@H](O)CCC)nc(nc1[C@@H](NCCN(CCO)CCO)N1CCCC(O)C1)N(CCO)CCO                                                       |
| C5500 | PI | Noninhibitor | 174 | CCN(CC)CCOC(=O)[C@H](Cc1ccccc1)c1ccccc1                                                                                      |
| C5501 | PI | Noninhibitor | 174 | CC[C@@H](c1ccccc1)/C/I=C(/OCCCN2CCN(CCCO1)CC2)\[C@H](CC)c1ccccc1                                                             |
| C5502 | PI | Noninhibitor | 174 | NCCCCCNSe1ccccc2c(Cl)ccccc12                                                                                                 |
| C5503 | PI | Noninhibitor | 174 | C1CN(CCN1CCe1[nH]nnn1)c1ccccc1                                                                                               |
| C5504 | PI | Inhibitor    | 174 | c1ccc(cc1c1ccc(=O)c2c(cc(cc2o1)O)O)OCCOCCOCCOCCO                                                                             |
| C5505 | PI | Noninhibitor | 174 | Oe1c2O[C@H]3C(=O)CC[C@@]4(O)[C@@H]5Cc(cc1)c2[C@]34CCN5CC1CC1                                                                 |
| C5506 | PI | Noninhibitor | 174 | N(C)CC[C@H](c1ccccc1)c1ccccc1                                                                                                |
| C5507 | PI | Inhibitor    | 174 | Oe1ccc2[nH]cc(CCCCN3CCC(=CC3)c3ccccc3)c2c1                                                                                   |
| C5508 | PI | Inhibitor    | 174 | Oe1cc(CCCCC)cc(O)c1[C@H]1C=C(C)CC[C@H]1C(=C)C                                                                                |
| C5509 | PI | Inhibitor    | 174 | O[C@H]1C=C[C@@H]2C(=O)O[C@H]3C[C@H](C/C=C/C[C@H](/C=C/C=C/4CO[C@H]1[C@@]24O)C)O[C@]1(C3)C/C(=N/OC)[C@H](C)C(O1)C(=C/C(C)C)/C |
| C5510 | PI | Inhibitor    | 174 | OCC(=O)[C@]1(O)CC[C@@H]2[C@@H]3CCCC4=CC(=O)CC[C@H]4[C@@H]3C(=O)C[C@]12C                                                      |
| C5511 | PI | Noninhibitor | 174 | [N]=C(N)N1CCc2ccccc2C1                                                                                                       |
| C5512 | PI | Noninhibitor | 174 | CC(C)NC[C@H](COe1c(cc(cc1)NC(=O)C)C(=O)C)O                                                                                   |
| C5513 | PI | Inhibitor    | 174 | c1c(ccc2c1sc(c1ccc(cc1)S(=O)(=O)CCCC)c2C(=O)c1ccc(OCCN2CCCCC2)cc1)OS(=O)(=O)CCCC                                             |
| C5514 | PI | Inhibitor    | 174 | C1(c2ccccc2C2C(c3c1ccc3)C2(F)F)N1CCN(CC1)C[C@@H](COe1c2c(ccc1)nc2)O                                                          |
| C5515 | PI | Inhibitor    | 174 | CCOe1c(OC)cc2c(c1)[C@H]1CN(C)CC[C@H]1N=C2c1ccc(cc1)C(=O)N(C(C)C)C(C)C                                                        |
| C5516 | PI | Inhibitor    | 174 | N(c1ccc(cc1)C1=N[C@@H]2CCN(C)C[C@H]2c2c1cc(OC)c(OC)c2)S(=O)(=O)c1ccc(C)cc1                                                   |
| C5517 | PI | Noninhibitor | 174 | OC(=O)[C@@]1(C)CCc2c(C)c(O)c(C)c2O1                                                                                          |
| C5518 | PI | Noninhibitor | 174 | Oe1c([C@H](CC(=O)C)c2ccc(cc2)[N+](=O)[O-])c(=O)c2ccccc2o1                                                                    |

|       |    |              |     |                                                                                                                                                  |
|-------|----|--------------|-----|--------------------------------------------------------------------------------------------------------------------------------------------------|
| C5519 | PI | Noninhibitor | 174 | Oc1ccc(cc1)NC(=O)C                                                                                                                               |
| C5520 | PI | Noninhibitor | 174 | ONC(=O)C                                                                                                                                         |
| C5521 | PI | Noninhibitor | 174 | N(CC(=O)OCc1ccccc1)C(=O)[C@@H](CSC(=O)C)Cc1ccccc1                                                                                                |
| C5522 | PI | Noninhibitor | 174 | NS(=O)(=O)c1c(Cl)cc2N[C@H](CSCC=C)NS(=O)(=O)c2c1                                                                                                 |
| C5523 | PI | Noninhibitor | 174 | oc[C@H]1O[C@@H](O[C@H]2[C@@H](C[C@@H](N)[C@@H](O[C@H]3O[C@@H](CN)[C@@H](O)[C@H](O)[C@@H]3O)[C@@H]2O)NC(=O)[C@@H](O)CCN)[C@@H](O)[C@H](N)[C@@H]1O |
| C5524 | PI | Noninhibitor | 174 | [nH]1cnc2c1c(=O)n(C)c(=O)n2C                                                                                                                     |
| C5525 | PI | Noninhibitor | 174 | CN(C)c1c(C)n(C)n(c1=O)c1ccccc1                                                                                                                   |
| C5526 | PI | Noninhibitor | 174 | OC(=O)[C@H]1N2[C@@H](SC1(C)C)[C@@H](NC(=O)[C@@H](N)c1ccc(O)cc1)C2=O                                                                              |
| C5527 | PI | Noninhibitor | 174 | Ne1cc(c[nH]c1=O)c1cnccl                                                                                                                          |
| C5528 | PI | Noninhibitor | 174 | Oc1c(cccc1NC=O)C(=O)N[C@@H]1[C@H](C)OC(=O)[C@@H](CCCCC)[C@H](OC(=O)CC(C)C)[C@H](C)OC1=O                                                          |
| C5529 | PI | Noninhibitor | 174 | CN1[C@H]2CC(C[C@@H]1[C@H]1O[C@@H]21)OC(=O)C(=C)c1ccccc1                                                                                          |
| C5530 | PI | Noninhibitor | 174 | Oc1ccc(cc1)[N+](=O)[O-]                                                                                                                          |
| C5531 | PI | Noninhibitor | 174 | OC[C@@H](O)[C@@H]1OC(=C(O)C1=O)O                                                                                                                 |
| C5532 | PI | Noninhibitor | 174 | O[C@@H]1CC(=C2[C@H]([C@@H]3OC(=O)[C@H](C)[C@H]13)C(=CC2=O)C)C                                                                                    |
| C5533 | PI | Noninhibitor | 174 | OC(=O)[C@@H]1N2[C@H](SC1(C)C)C(NC(=O)[C@@H](NC(=O)N1CCNC1=O)c1ccccc1)C2=O                                                                        |
| C5534 | PI | Noninhibitor | 174 | CC(C)(C)NC[C@H](c1cc(cc(c1)OC(=O)N(C)C)OC(=O)N(C)C)O                                                                                             |
| C5535 | PI | Noninhibitor | 174 | NS(=O)(=O)c1cc2c(cc1C(F)(F)F)N[C@@H](Cc1ccccc1)NS2(=O)=O                                                                                         |
| C5536 | PI | Inhibitor    | 174 | NS(=O)(=O)c1c(Cl)cc2NC(=NS(=O)(=O)c2c1)CSCc1ccccc1                                                                                               |
| C5537 | PI | Noninhibitor | 174 | O[C@H](CC[C@H]1[C@H](C)C=CC2=C[C@@H](O)C[C@H](OC(=O)[C@H](C)CC)[C@H]12)[C@@H](O)CC(=O)O                                                          |
| C5538 | PI | Noninhibitor | 174 | OC[C@@H]1O[C@@H]2[C@H](OC(=O)c3cc(O)c(OC)c(O)c23)C(O)[C@@H]1O                                                                                    |
| C5539 | PI | Noninhibitor | 174 | N(C)CCc1cccn1                                                                                                                                    |
| C5540 | PI | Noninhibitor | 174 | C1C[C@@H]2C([C@@]3(C1=CC(=C)C=C3)C)([C@H](C[C@]1([C@H]2C[C@@H]([C@@]1(C(=O)CO)O)C)C)O)F                                                          |
| C5541 | PI | Noninhibitor | 174 | O[C@@H](COc1ccc(CCOC2CC2)cc1)CNC(C)C                                                                                                             |
| C5542 | PI | Noninhibitor | 174 | O[C@@H]1CC[C@@]2(C)[C@H](CC[C@@]3(C)[C@@H]2CC[C@@H]2[C@H]4[C@@H](CC[C@]4(CC[C@@]32C)C(=O)O)C(=C)C)C1(C)C                                         |
| C5543 | PI | Noninhibitor | 174 | CN1CCc2cc3c(OCO3)cc2[C@@H]1[C@H]1OC(=O)c2c1ccc1c2OCO1                                                                                            |
| C5544 | PI | Noninhibitor | 174 | CC(=O)Oc1ccc(cc1)C(c1ccc(OC(=O)C)cc1)c1cccn1                                                                                                     |
| C5545 | PI | Noninhibitor | 174 | CS(=O)(=O)OCCCCOS(=O)(=O)C                                                                                                                       |
| C5546 | PI | Inhibitor    | 174 | [nH]1c2cc(OC)ccc2c2c1[C@H]1C[C@@H]3[C@@H](C[C@H](OC(=O)c4cc(OC)c(OC)c(OC)c4)[C@H](OC)C3C(=O)OC)CN1CC2                                            |
| C5547 | PI | Noninhibitor | 174 | Ne1c(Br)cc(C(=O)NCCN(CC)CC)c(OC)c1                                                                                                               |
| C5548 | PI | Noninhibitor | 174 | N(C(=O)[C@@H]1CCCCN1CCCC)c1c(C)cccc1C                                                                                                            |
| C5549 | PI | Noninhibitor | 174 | N1[C@@H]2N(C)CC[C@@]3([C@H]4Ne5c(cccc5)[C@@]23CCN4C)c2ccccc12                                                                                    |
| C5550 | PI | Noninhibitor | 174 | O[C@]1(CC)C(=O)OCc2c1cc1n(Cc3c1nc1ccccc1c3)c2=O                                                                                                  |
| C5551 | PI | Noninhibitor | 174 | COc1c(OC)c2c(C[C@@H]3N(CCc4cc5c(OCO5)cc34)C2)cc1                                                                                                 |
| C5552 | PI | Noninhibitor | 174 | OC(=O)[C@@H](C(=O)N[C@H]1[C@@H]2SC(C)(C)[C@H](N2C1=O)C(=O)O)c1ccccc1                                                                             |
| C5553 | PI | Inhibitor    | 174 | OC(=O)CCC(=O)O[C@@H]1CC[C@@]2(C)[C@H](CC[C@@]3(C)[C@@H]2C(=O)C=C2[C@@H]4C[C@@](C)(CC[C@@]4C)CC[C@]32C)C(=O)O)C1(C)C                              |
| C5554 | PI | Noninhibitor | 174 | N(CCC1)C(=O)N(CCC1)N=O                                                                                                                           |
| C5555 | PI | Noninhibitor | 174 | OC(=O)C1=C(Cl)CS[C@@H]2[C@H](NC(=O)[C@H](N)c3ccccc3)C(=O)N12                                                                                     |
| C5556 | PI | Noninhibitor | 174 | OC(=O)C1=C(CSc2nnnn2C)CS[C@@H]2N1C(=O)[C@]2(OC)NC(=O)CSCC#N                                                                                      |
| C5557 | PI | Inhibitor    | 174 | OC(=O)C1=C(COC(=O)C)CS[C@@H]2[C@@H](NC(=O)/C(=N/OC)/c3csc(n3)N)C(=O)N12                                                                          |
| C5558 | PI | Noninhibitor | 174 | OC(=O)C1=C(COC(=O)N)CS[C@@H]2N1C(=O)[C@H]2NC(=O)/C(=N/OC)/c1ccco1                                                                                |
| C5559 | PI | Noninhibitor | 174 | OC(=N)c1cc(=O)c(=O)c2=c1[nH]c1c(o2)cc(cc1)N(CC)CC                                                                                                |
| C5560 | PI | Noninhibitor | 174 | OC(=O)C1=C(COC(=O)C)CS[C@@H]2[C@@H](NC(=O)Cc3ccccc3)C(=O)N12                                                                                     |
| C5561 | PI | Noninhibitor | 174 | OC(=O)C1=C(COC(=O)C)CS[C@@H]2[C@@H](NC(=O)CSc3ccccc3)C(=O)N12                                                                                    |
| C5562 | PI | Inhibitor    | 174 | O[C@@H]1CC[C@@]2(C)[C@H](C1)C[C@H](O)C1[C@@H]3CC[C@@H]([C@H](C)CCC(=O)O)[C@@]3(C)CC[C@H]21                                                       |
| C5563 | PI | Noninhibitor | 174 | CN1[C@H](c2ccc(Cl)cc2)S(=O)(=O)CCC1=O                                                                                                            |
| C5564 | PI | Noninhibitor | 174 | COc1ccc(cc1)C(=C(c1ccc(OC)cc1)c1ccc(OC)cc1)Cl                                                                                                    |

|       |    |              |     |                                                                                                                          |
|-------|----|--------------|-----|--------------------------------------------------------------------------------------------------------------------------|
| C5565 | PI | Inhibitor    | 174 | O[C@H](COC(=O)N)COc1ccc(Cl)cc1                                                                                           |
| C5566 | PI | Noninhibitor | 174 | N(CCC)C(=O)NS(=O)(=O)c1ccc(Cl)cc1                                                                                        |
| C5567 | PI | Noninhibitor | 174 | O[C@@]1(NC(=O)c2ccccc12)c1cc(c(Cl)cc1)S(=O)(=O)N                                                                         |
| C5568 | PI | Noninhibitor | 174 | NS(=O)(=O)c1c(Cl)cc2NC=NS(=O)(=O)c2c1                                                                                    |
| C5569 | PI | Noninhibitor | 174 | O=C1C=CC(=O)c2c1ccc1c2ccc2ccccc12                                                                                        |
| C5570 | PI | Noninhibitor | 174 | N(CCCCN1CCN(CC1)c1ccccc1OC)C(=O)c1cc2ccccc2cc1                                                                           |
| C5571 | PI | Noninhibitor | 174 | OC(=O)c1nn(CC)c2cc3c(OCC3)cc2c1=O                                                                                        |
| C5572 | PI | Noninhibitor | 174 | N([C@@H]1CCSC1=O)C(=O)C                                                                                                  |
| C5573 | PI | Noninhibitor | 174 | O[C@H](CNC(C)(C)C)c1cc(Cl)c(N)c(Cl)c1                                                                                    |
| C5574 | PI | Inhibitor    | 174 | O[C@H]1[C@@H](O[C@@H]([C@@H]([C@@H](NC(=O)[C@H]2C[C@@H](CCC)CN2C)[C@@H](C)Cl)[C@@H](O)[C@@H]1O)SC                        |
| C5575 | PI | Noninhibitor | 174 | OC1C[C@@]2(C)[C@H](C[C@@H](C)[C@]2(OC(=O)CC)C(=O)CC1)[C@H]2CCC3=CC(=O)C=C[C@@]3(C)[C@@]12F                               |
| C5576 | PI | Noninhibitor | 174 | OC(=O)C(C)(C)Oe1ccc(Cl)cc1                                                                                               |
| C5577 | PI | Noninhibitor | 174 | NS(=O)(=O)c1c(Cl)ccc(c1)C(=O)NN1[C@H](C)CCC[C@H]1C                                                                       |
| C5578 | PI | Noninhibitor | 174 | C#CCN(C)CCCOc1c(Cl)cc(Cl)cc1                                                                                             |
| C5579 | PI | Inhibitor    | 174 | O[C@@H]1C[C@H](CCn2c(C(C)C)c(C(=O)Nc3ccccc3)c(c2c2ccc(F)cc2)c2ccccc2)OC(=O)C1                                            |
| C5580 | PI | Noninhibitor | 174 | COe1c(OC)cc(cc1)C(=O)OC1C[C@@H]2CC[C@H](C1)N2C                                                                           |
| C5581 | PI | Noninhibitor | 174 | OCC(=O)[C@]1(O)CC[C@@H]2[C@H]3CCCC=CC(=O)CC[C@@]4(C)[C@@H]3C(O)C[C@]12C                                                  |
| C5582 | PI | Noninhibitor | 174 | O[C@H](CC1CC(=O)NC(=O)C1)[C@H]1CC(C)C[C@@H](C)C1=O                                                                       |
| C5583 | PI | Inhibitor    | 174 | OC1C[C@@]2(C)[C@H](C[C@H](C)[C@]2(O)C(=O)COC(=O)C)[C@H]2CCC3=CC(=O)C=C[C@@]3(C)[C@]12F                                   |
| C5584 | PI | Noninhibitor | 174 | ON(CCCCCNC(=O)CCC(=O)N(O)CCCCNC(=O)CCC(=O)N(O)CCCCCN)C(=O)C                                                              |
| C5585 | PI | Noninhibitor | 174 | O[C@@H]1[C@@H]2C34[C@H]5[C@@H]6[C@@H](OC)[C@H]5[C@@]5(C)[C@H]6OC)OCO[C@@]15[C@@H]3N(CC)C[C@@]2(COC)CC[C@H]4OC            |
| C5586 | PI | Noninhibitor | 174 | O[C@@H]1CC[C@@]2(COC)CN(CC)[C@H]3[C@@]4(O)[C@@H](OC)[C@@H]2[C@@]13[C@H]1C[C@@H]2[C@@H](OC)[C@@H]1[C@@]4(O)C[C@H]2OC      |
| C5587 | PI | Noninhibitor | 174 | O[C@@]12C[C@H]3[C@@H](OC)[C@]1(O)[C@@]1(C[C@@H]3OC)OCO[C@@]31[C@@H]([C@H]1[C@@]42[C@H]3N(CC)C[C@@]1(C)CC[C@@H]4OC)C(=O)C |
| C5588 | PI | Inhibitor    | 174 | O[C@H]1C[C@@H](CC[C@H]2[C@H](C)C=CC3=C[C@@H](C)C[C@H](OC(=O)C(C)(C)CC)[C@H]23)OC(=O)C1                                   |
| C5589 | PI | Noninhibitor | 174 | O[C@H]1[C@H]2C[C@@H]3[C@H](N(C)C)C(=O)C(=O)N(C(=O)N)[C@@]3(O)C(=O)C2=C(O)c2c(O)ccc(Cl)c12                                |
| C5590 | PI | Noninhibitor | 174 | N(C(=O)OCC)C1=C(N2CC2)C(=O)C(=C(N2CC2)C1=O)NC(=O)OCC                                                                     |
| C5591 | PI | Noninhibitor | 174 | CCN(CC)C(=O)N1CCN(C)CC1                                                                                                  |
| C5592 | PI | Noninhibitor | 174 | Oe1ccc(cc1)/C(=C/CC)c1ccc(O)cc1/CC                                                                                       |
| C5593 | PI | Noninhibitor | 174 | N1C(=O)OC(C)(C)C1=O                                                                                                      |
| C5594 | PI | Noninhibitor | 174 | Oe1ccc(cc1)/C(=C/C)/C(=C/C)/c1ccc(O)cc1                                                                                  |
| C5595 | PI | Inhibitor    | 174 | N(C(=O)OC[C@@H](CN1CCCC1)OC(=O)Ne1ccccc1)c1ccccc1                                                                        |
| C5596 | PI | Noninhibitor | 174 | OS(=O)(=O)CN(C)c1c(C)n(C)n(c1=O)c1ccccc1                                                                                 |
| C5597 | PI | Noninhibitor | 174 | O[C@H](CN(CC(C)S(=O)(=O)c1ccc(cc1)N)[C@@H](Cc1ccccc1)NC(=O)O[C@H]1CCOC1                                                  |
| C5598 | PI | Inhibitor    | 174 | Oe1c(OC)cc2CCN3C4c(C[C@H]3c2c1)ccc(OC)c4O                                                                                |
| C5599 | PI | Noninhibitor | 174 | O[C@H]1[C@H]2[C@@H](C)c3ccccc(O)c3C(=C2C(=O)[C@@]2(O)[C@H]1[C@H](N(C)C)C(=O)C(=C(/O)\N)/C2=O)O                           |
| C5600 | PI | Noninhibitor | 174 | CC[C@@]12CCCN3CCc4c([C@H]13)n(c1ccccc41)C(=O)C2                                                                          |
| C5601 | PI | Noninhibitor | 174 | Oe1cc(O)c2c(=O)cc(oc2c1)c1ccc(OC)cc1                                                                                     |
| C5602 | PI | Noninhibitor | 174 | C1[C@H](C(Oc2cc(cc(c12)O)O)c1cc(c(cc1)O)O)O                                                                              |
| C5603 | PI | Noninhibitor | 174 | O[C@@]12O[C@@](NC(=O)[C@@H]3CN(C)[C@H]4Cc5c[nH]c6ccccc56)C4=C3)(C(C)C)C(=O)N1[C@@H](C(C)C)C(=O)N1CCC[C@@H]21             |
| C5604 | PI | Inhibitor    | 174 | O[C@@]12O[C@@](NC(=O)[C@@H]3CN(C)[C@H]4Cc5c[nH]c6ccccc56)C4=C3)(C(C)C)C(=O)N1[C@@H](Cc1ccccc1)C(=O)N1CCCC21              |
| C5605 | PI | Noninhibitor | 174 | N([C@@H]1CCc2cc(OC)c(OC)c(OC)c2[C@H]2CCCC(OC)C(=O)C[C@H]12)C(=O)C                                                        |
| C5606 | PI | Inhibitor    | 174 | O[C@@]12O[C@@](NC(=O)[C@@H]3CN(C)[C@H]4Cc5c[nH]c6ccccc56)C4=C3)(C(C)C)C(=O)N1[C@@H](CC(C)C)C(=O)N1CCCC21                 |
| C5607 | PI | Noninhibitor | 174 | N(C)C(=O)Oe1ccc2N(C)[C@H]3N(C)CC[C@@]3(C)c2c1                                                                            |
| C5608 | PI | Noninhibitor | 174 | NC(=S)c1cc(CC)ncc1                                                                                                       |
| C5609 | PI | Noninhibitor | 174 | N1c2c(cc(OCC)cc2)C(=CC1(C)C)C                                                                                            |
| C5610 | PI | Noninhibitor | 174 | OC(=O)CN(CC(=O)O)CC(=O)Ne1c(CC)ccccc1CC                                                                                  |

|       |    |              |     |                                                                                                                                  |
|-------|----|--------------|-----|----------------------------------------------------------------------------------------------------------------------------------|
| C5611 | PI | Noninhibitor | 174 | O[C@@H](COc1c(OC)c2nc3c(cco3)c(OC)c2cc1)C(C)(C)O                                                                                 |
| C5612 | PI | Noninhibitor | 174 | N(CC)[C@@H](C)Cc1cc(ccc1)C(F)(F)F                                                                                                |
| C5613 | PI | Noninhibitor | 174 | OC(=O)[C@@H](C)c1cc(Oc2ccccc2)ccc1                                                                                               |
| C5614 | PI | Inhibitor    | 174 | O[C@@H](CN[C@H](C)Cc1ccc(O)cc1)c1cc(O)cc(O)c1                                                                                    |
| C5615 | PI | Inhibitor    | 174 | Clc1ccc(OCC(=O)N2CCN(Cc3cc4c(OCO4)cc3)CC2)cc1                                                                                    |
| C5616 | PI | Inhibitor    | 174 | Cc1c(oc2c(cccc2c1=O)C(=O)OCCN1CCCCC1)c1ccccc1                                                                                    |
| C5617 | PI | Noninhibitor | 174 | O[C@@H]1C[C@@]2(C)[C@@H](C[C@@H]3OC(C)(C)O[C@@]23C(=O)COC(=O)C)[C@@H]2C[C@@H](F)C3=CC(=O)C=C[C@@]3(C)[C@@]12F                    |
| C5618 | PI | Noninhibitor | 174 | OCC(=O)[C@]1(O)CC[C@@H]2[C@H]3CCCC4=CC(=O)CC[C@@]4(C)[C@]3(F)C(O)C[C@]12C                                                        |
| C5619 | PI | Noninhibitor | 174 | OCC(=O)[C@]12OC(C)(C)O[C@@H]1C[C@@H]1[C@H]3C[C@@H](F)C4=CC(=O)C=C[C@@]4(C)[C@@H]3C(O)C[C@]21C                                    |
| C5620 | PI | Noninhibitor | 174 | CN(C)CCOC(c1ccccc1)c1ccccc1                                                                                                      |
| C5621 | PI | Noninhibitor | 174 | OC1C[C@@]2(C)[C@H](CC[C@]2(O)C(=O)C)[C@H]2C[C@H](C)C3=CC(=O)C=C[C@@]3(C)[C@]12F                                                  |
| C5622 | PI | Noninhibitor | 174 | OC(=O)CC[C@H](NC(=O)c1ccc(cc1)NCc1cnc2nc([nH]c(=O)e2n1)N)C(=O)O                                                                  |
| C5623 | PI | Noninhibitor | 174 | O[C@@H](COc1cccc2c1n(C)c(=O)cc2OC)C(C)(C)O                                                                                       |
| C5624 | PI | Noninhibitor | 174 | [O-][N+](=O)c1ccc(o1)/C=N/N1C[C@H](CN2CCOCC2)OC1=O                                                                               |
| C5625 | PI | Noninhibitor | 174 | OC(=O)c1cc(c(Cl)cc1NCc1ccco1)S(=O)(=O)N                                                                                          |
| C5626 | PI | Noninhibitor | 174 | OC(=O)CC1(CN)CCCCC1                                                                                                              |
| C5627 | PI | Noninhibitor | 174 | O[C@@H](C[C@@H](Cc1ccccc1)C(=O)N[C@H]1[C@H](O)Cc2ccccc12)CN1CCN(Cc2ccccc2)C[C@@H]1C(=O)NC(C)(C)C                                 |
| C5628 | PI | Noninhibitor | 174 | O[C@@H]1C[C@@H]2Oc3c(OC)ccc4c3[C@@]2(CCN(C)C4)C=C1                                                                               |
| C5629 | PI | Noninhibitor | 174 | N1=c2c(=C3C1=CC(=O)C=C3)ccnc2C                                                                                                   |
| C5630 | PI | Noninhibitor | 174 | OCC(CO)OCn1cnc2c1nc([nH]c2=O)N                                                                                                   |
| C5631 | PI | Noninhibitor | 174 | N1C(=O)[C@@]2([C@@H]3OC[C@@H]4[C@@H]5[C@H]2[C@]([C@H]4C3)(CN5C)C=C)c2ccccc12                                                     |
| C5632 | PI | Noninhibitor | 174 | N(N1C[C@H]2CCC[C@H]2C1)C(=O)NS(=O)(=O)c1ccc(C)cc1                                                                                |
| C5633 | PI | Noninhibitor | 174 | Cn1c2ccccc2c(=O)cc1c1cc2c(OCO2)cc1                                                                                               |
| C5634 | PI | Noninhibitor | 174 | OC[C@H](O)COc1ccccc1OC                                                                                                           |
| C5635 | PI | Noninhibitor | 174 | Clc1cc(Cl)c(Cl)cc1OCC#Cl                                                                                                         |
| C5636 | PI | Inhibitor    | 174 | CC(=O)N1CCN(CC1)c1ccc(OC[C@@H]2CO[C@](Cn3ccnc3)(O2)c2ccc(Cl)cc2Cl)cc1                                                            |
| C5637 | PI | Inhibitor    | 174 | [nH]1c2=CC(=O)C=Cc2c2CCNC(=c12)C                                                                                                 |
| C5638 | PI | Noninhibitor | 174 | n1c2ccccc2c2c1c(C)[nH]cc2                                                                                                        |
| C5639 | PI | Noninhibitor | 174 | [nH]1c2ccccc2c2c1[C@@H](C)NCC2                                                                                                   |
| C5640 | PI | Noninhibitor | 174 | O[C@H]1C[C@]2(C)[C@H](C[C@H]3OC(C)(C)O[C@@]23C(=O)CC1)[C@H]2CCC3=CC(=O)CC[C@@]3(C)[C@@]12F                                       |
| C5641 | PI | Noninhibitor | 174 | O[C@H]1CCN2CC=C(COC(=O)[C@@](O)(C(C)C)[C@H](C)OC)C12                                                                             |
| C5642 | PI | Noninhibitor | 174 | OCCN1CCN(CCS(=O)(=O)O)CC1                                                                                                        |
| C5643 | PI | Noninhibitor | 174 | N1CCC2=c3ccc(OC)cc3=NC2=C1C                                                                                                      |
| C5644 | PI | Noninhibitor | 174 | O[C@H]1[C@@H](C)O[C@@H](OC[C@H]2O[C@@H](Oc3cc(O)c4C(=O)C[C@H](Oc4c3)c3cc(O)c(OC)cc3)[C@@H](O)[C@@H](O)[C@@H]2O)[C@@H](O)[C@@H]1O |
| C5645 | PI | Noninhibitor | 174 | O[C@@H]1C=C2CCN(C)[C@H]2[C@H]2[C@H]1OC(=O)c1cc3c(OCO3)cc21                                                                       |
| C5646 | PI | Inhibitor    | 174 | COc1c(OC)c2c(cc1)[C@H](OC2=O)[C@@H]1N(C)CCc2cc3c(OCO3)cc12                                                                       |
| C5647 | PI | Noninhibitor | 174 | O[C@@H]1N(C)CCc2cc3c(OCO3)cc12                                                                                                   |
| C5648 | PI | Noninhibitor | 174 | O[C@@H]([C@@H](C)N1CCC(Cc2ccccc2)CC1)c1ccc(O)cc1                                                                                 |
| C5649 | PI | Noninhibitor | 174 | Oc1c2c(C[C@@H]3N(C)CCc4cc(OC)c(OC)c2c34)ccc1OC                                                                                   |
| C5650 | PI | Noninhibitor | 174 | NC(=O)C(CCN(C(C)C)C(C)C)c1ccccc1)c1ccccc1                                                                                        |
| C5651 | PI | Noninhibitor | 174 | N(C(C)C)c1c(C)n(C)n(c1=O)c1ccccc1                                                                                                |
| C5652 | PI | Noninhibitor | 174 | [O-][N+](=O)O[C@H]1CO[C@H]2[C@H](CO[C@@H]12)O[N+](=O)[O-]                                                                        |
| C5653 | PI | Noninhibitor | 174 | OC[C@H]1O[C@H](O[C@H]2C(O)[C@H](O[C@H]3O[C@@H](CN)[C@@H](O)[C@@H](O)[C@H]3O)[C@@H](C[C@@H]2N)N)[C@H](O)[C@H](N)[C@H]1O           |
| C5654 | PI | Noninhibitor | 174 | O[C@@H]1[C@@H]2C[C@@H]3[C@H]1[C@](O)(C[C@@H]2OC)[C@H]1C[C@H]2[C@]43[C@H]1N(CC)C[C@]2(C)CC[C@H]4O                                 |
| C5655 | PI | Noninhibitor | 174 | COC1=CC(=O)O[C@H](C1)/C=C/c1ccccc1                                                                                               |
| C5656 | PI | Noninhibitor | 174 | [nH]1c(=O)n(CCN2CCC(CC2)C(=O)c2ccc(F)cc2)c(=O)c2ccccc12                                                                          |

|       |    |              |     |                                                                                                       |
|-------|----|--------------|-----|-------------------------------------------------------------------------------------------------------|
| C5657 | PI | Noninhibitor | 174 | <chem>N(Cc1cccc1)c1[nH]cnc2c1nnc2</chem>                                                              |
| C5658 | PI | Inhibitor    | 174 | <chem>COc1c(OC)cc(C[C@@H]2N(C)CCc3cc(OC)c(OC)cc23)c(Br)c1</chem>                                      |
| C5659 | PI | Noninhibitor | 174 | <chem>N(C(=O)c1c(C)onc1)c1ccc(cc1)C(F)(F)F</chem>                                                     |
| C5660 | PI | Noninhibitor | 174 | <chem>OC(=O)CC[C@H](NC(=O)c1ccc(cc1)NCC1CNc2c(N1C=O)c(=O)[nH]c(N)n2)C(=O)O</chem>                     |
| C5661 | PI | Noninhibitor | 174 | <chem>O[C@H](COc1cccc2c1CCCC2=O)CNC(C)(C)C</chem>                                                     |
| C5662 | PI | Noninhibitor | 174 | <chem>O[C@]1(CC[C@H]2[C@H]3CCCC4=CC(=O)CC[C@H]4[C@H]3CC[C@@]12CC)C#C</chem>                           |
| C5663 | PI | Inhibitor    | 174 | <chem>O[C@@H]1CC[C@@]2(C)[C@@H](CCC3[C@@H]4CC[C@@H]([C@H](C)CCC(=O)O)[C@@]4(C)CC[C@H]23)C1</chem>     |
| C5664 | PI | Noninhibitor | 174 | <chem>O[C@@H](C[C@H]1CCC[C@H](CC(=O)c2cccc2)N1C)c1cccc1</chem>                                        |
| C5665 | PI | Noninhibitor | 174 | <chem>OC(=O)c1cn(CC)c2c(cc(F)c(N3CCN[C@H](C)C3)c2F)c1=O</chem>                                        |
| C5666 | PI | Noninhibitor | 174 | <chem>CCN(CC)CCOCCOC(=O)C1(CCCC1)c1cccc1</chem>                                                       |
| C5667 | PI | Noninhibitor | 174 | <chem>CN1c2ccc(Cl)cc2C(=NCC1=O)c1cccc1</chem>                                                         |
| C5668 | PI | Inhibitor    | 174 | <chem>O[C@H]1C[C@H](CC[C@H]2[C@@H](C)C=CC3=C[C@@H](C)C[C@@H](OC(=O)[C@H](C)CC)[C@H]23)OC(=O)C1</chem> |
| C5669 | PI | Noninhibitor | 174 | <chem>CN(C)CCOC(=O)COc1ccc(Cl)cc1</chem>                                                              |
| C5670 | PI | Noninhibitor | 174 | <chem>O[C@H]1C=C2CCN3C4cc5c(OCO5)cc4[C@@H]([C@H]23)[C@@H]1O</chem>                                    |
| C5671 | PI | Inhibitor    | 174 | <chem>OC[C@H]1CN(C)[C@H]2Cc3c[nH]c4cccc(c34)C2=C1</chem>                                              |
| C5672 | PI | Inhibitor    | 174 | <chem>N([C@@H]1CN(C)[C@@H]2Cc3c[nH]c4cccc(c34)C2=C1)C(=O)N(CC)CC</chem>                               |
| C5673 | PI | Inhibitor    | 174 | <chem>NCc1ccc(cc1)S(=O)(=O)N</chem>                                                                   |
| C5674 | PI | Noninhibitor | 174 | <chem>CN(CCC1)CCCl</chem>                                                                             |
| C5675 | PI | Noninhibitor | 174 | <chem>Cc1cc(CN2CCN(CC2)[C@H](c2cccc2)c2ccc(Cl)cc2)ccc1</chem>                                         |
| C5676 | PI | Noninhibitor | 174 | <chem>N1C(=O)C[C@@](C)(CC)C1=O</chem>                                                                 |
| C5677 | PI | Noninhibitor | 174 | <chem>OC(=O)c1cccc1Nc1c(Cl)ccc(C)c1Cl</chem>                                                          |
| C5678 | PI | Noninhibitor | 174 | <chem>N(CCN(CC)CC)C(=O)COc1ccc(OC)cc1</chem>                                                          |
| C5679 | PI | Noninhibitor | 174 | <chem>OS(=O)(=O)CCS</chem>                                                                            |
| C5680 | PI | Noninhibitor | 174 | <chem>O[C@]1(CC[C@H]2[C@@H]3CCc4cc(OC)ccc4[C@H]3CC[C@@]12C)C#C</chem>                                 |
| C5681 | PI | Noninhibitor | 174 | <chem>OC(=O)[C@@H]1[C@H]2[C@@H]2[C@H](SC1(C)C)[C@H](NC(=O)[C@H](N=C)c1cccc1)C2=O</chem>               |
| C5682 | PI | Inhibitor    | 174 | <chem>O[C@H](CNC)c1cc(OC)c(O)cc1</chem>                                                               |
| C5683 | PI | Noninhibitor | 174 | <chem>CN(C)CCN(Cc1cccs1)c1cccn1</chem>                                                                |
| C5684 | PI | Noninhibitor | 174 | <chem>CN1CC[C@]23[C@@H]4[C@H]1Cc1c2c(c(cc1)OC)O[C@H]3C(=O)CC4</chem>                                  |
| C5685 | PI | Noninhibitor | 174 | <chem>[nH]1ccn(C)c1=S</chem>                                                                          |
| C5686 | PI | Noninhibitor | 174 | <chem>OC(=O)[C@H](CCS(=O)(=N)C)N</chem>                                                               |
| C5687 | PI | Inhibitor    | 174 | <chem>CN1CCCC(CC2c3cccc3Sc3c2cccc3)C1</chem>                                                          |
| C5688 | PI | Noninhibitor | 174 | <chem>O[C@H](COC(=O)N)COc1cccc1OC</chem>                                                              |
| C5689 | PI | Noninhibitor | 174 | <chem>O[C@@H]([C@H](C)N)c1c(OC)ccc(OC)c1</chem>                                                       |
| C5690 | PI | Noninhibitor | 174 | <chem>OC[C@@H](CC)NC(=O)[C@H]1CN(C)[C@@H]2Cc3c[nH]c4cccc(c34)C2=C1</chem>                             |
| C5691 | PI | Inhibitor    | 174 | <chem>OCC(=O)[C@]1(O)CC[C@@H]2[C@@H]3C[C@@H](C)C4=CC(=O)C=C[C@]4(C)[C@@H]3C(O)C[C@]12C</chem>         |
| C5692 | PI | Noninhibitor | 174 | <chem>OCCn1c(C)ncc1[N+](=O)[O-]</chem>                                                                |
| C5693 | PI | Noninhibitor | 174 | <chem>Nc1nc(N)c(mn1)c1c(Cl)c(Cl)ccc1</chem>                                                           |
| C5694 | PI | Inhibitor    | 174 | <chem>O[C@@]1(CC[C@@H]2[C@H]3CCCC4=CC(=O)CCC4=C3[C@H](C[C@@]12C)c1ccc(cc1)N(C)C)C#CC</chem>           |
| C5695 | PI | Noninhibitor | 174 | <chem>OC(=O)[C@@H](Cn1ccc(=O)c(O)c1)N</chem>                                                          |
| C5696 | PI | Noninhibitor | 174 | <chem>ClC(Cl)[C@H](c1ccc(Cl)cc1)c1cccc1Cl</chem>                                                      |
| C5697 | PI | Noninhibitor | 174 | <chem>O[C@]1(C)[C@H](C)C(=O)O[C@@H]2CCN3CC=C(COC(=O)[C@]1(C)O)C23</chem>                              |
| C5698 | PI | Noninhibitor | 174 | <chem>OC(=O)CC/C(=C/Cc1c(O)c2c(COC2=O)c(C)c1OC)/C</chem>                                              |
| C5699 | PI | Noninhibitor | 174 | <chem>Oc1cc(O)c2c(=O)c(O)c(oc2c1)c1cc(O)c(O)c(O)c1</chem>                                             |
| C5700 | PI | Noninhibitor | 174 | <chem>OC(=O)C[C@@H](NC(=O)C)C(=O)O</chem>                                                             |
| C5701 | PI | Noninhibitor | 174 | <chem>OC[C@H]1O[C@H](O)[C@@H](NC(=O)C)[C@@H](O[C@@H](C)C(=O)O)C1O</chem>                              |
| C5702 | PI | Noninhibitor | 174 | <chem>N1[C@H](C)CCC[C@@H]1C</chem>                                                                    |

|       |    |              |     |                                                                                                                                                                        |
|-------|----|--------------|-----|------------------------------------------------------------------------------------------------------------------------------------------------------------------------|
| C5703 | PI | Noninhibitor | 174 | <chem>O[C@@H]1C(=C)[C@@H]2C[C@@]31[C@H]1C[C@H]4[C@@]5([C@H]1N(CC)C[C@]4(C)CC[C@H]5O)[C@@H]3C[C@H]2O</chem>                                                             |
| C5704 | PI | Noninhibitor | 174 | <chem>OC(=O)[C@@H](C)c1cc2c(cc1)cc(OC)cc2</chem>                                                                                                                       |
| C5705 | PI | Inhibitor    | 174 | <chem>Oc1ccc(cc1)[C@H]1CC(=O)c2c(O)cc(O)cc2O1</chem>                                                                                                                   |
| C5706 | PI | Noninhibitor | 174 | <chem>OC[C@@H]1O[C@H](Oe2cc(O)c3C(=O)C[C@H](Oe3c2)e2ccc(O)cc2)[C@@H](O[C@H]2O[C@@H](C)[C@H](O)[C@@H](O)[C@H]2O)[C@H](O)[C@@H]1O</chem>                                 |
| C5707 | PI | Noninhibitor | 174 | <chem>O[C@@H]1[C@@H](CN)O[C@@H](O[C@H]2[C@@H](O)[C@@H](O)[C@@H](C[C@H]2N)N)[C@H](N)[C@H]1O</chem>                                                                      |
| C5708 | PI | Noninhibitor | 174 | <chem>OC[C@@H]1O[C@H](O[C@H]2C(O)[C@H](O[C@H]3O[C@@H](CN)[C@H](O)C[C@@H]3N)[C@H](C[C@@H]2N)N)[C@@H](O)[C@@H](N)[C@H]1O</chem>                                          |
| C5709 | PI | Noninhibitor | 174 | <chem>CN1CCO[C@@H](c2cccc2)c2c(C1)cccc2</chem>                                                                                                                         |
| C5710 | PI | Noninhibitor | 174 | <chem>N(C(=O)c1ncccc1)c1c(C)n(C)n(c1=O)c1cccc1</chem>                                                                                                                  |
| C5711 | PI | Noninhibitor | 174 | <chem>OC(=O)c1c(nccc1)Nc1cccc(c1)C(F)F</chem>                                                                                                                          |
| C5712 | PI | Noninhibitor | 174 | <chem>[nH]1c2cccc2c2c1[C@H]1[C@@H]3CC[C@@H]([C@H]4CCNC34)N1CC2</chem>                                                                                                  |
| C5713 | PI | Noninhibitor | 174 | <chem>O[C@@H]([C@H](C)N)c1cc(O)c(O)cc1</chem>                                                                                                                          |
| C5714 | PI | Noninhibitor | 174 | <chem>O[C@@H](CNC(C)C)c1cc(O)cc(O)c1</chem>                                                                                                                            |
| C5715 | PI | Noninhibitor | 174 | <chem>O[C@H](CC)Cn1c(C)nc1[N+](=O)[O-]</chem>                                                                                                                          |
| C5716 | PI | Noninhibitor | 174 | <chem>CN(C)CCO[C@H](c1cccc1)c1cccc1C</chem>                                                                                                                            |
| C5717 | PI | Noninhibitor | 174 | <chem>CCN(CC)CCc1nc(no1)c1cccc1</chem>                                                                                                                                 |
| C5718 | PI | Noninhibitor | 174 | <chem>OC(=O)c1cc2c(ccc2)c(Cc2cc3cccc3c(C(=O)O)c2O)c1O</chem>                                                                                                           |
| C5719 | PI | Noninhibitor | 174 | <chem>N1CCCC[C@@H]1[C@H](C(=O)OC)c1cccc1</chem>                                                                                                                        |
| C5720 | PI | Inhibitor    | 174 | <chem>N1CCCCC1CC(C1CCCC1)C1CCCC1</chem>                                                                                                                                |
| C5721 | PI | Noninhibitor | 174 | <chem>oc[C@@H]1O[C@@H](O[C@@H]2C(O)[C@@H](C[C@H](N)[C@@H]2O[C@H]2O[C@H](CO)[C@@H](O)[C@@H](O)[C@H]2N)N)[C@H](O)[C@H]1O[C@@H]1O[C@@H](CN)[C@H](O)[C@H](O)[C@H]1N</chem> |
| C5722 | PI | Noninhibitor | 174 | <chem>C/C1=C/CC[C@@]2(C)O[C@H]2[C@@H]2OC(=O)C(=C)[C@@H]2CC1</chem>                                                                                                     |
| C5723 | PI | Noninhibitor | 174 | <chem>CN1C(C)(C)CCCC1(C)C</chem>                                                                                                                                       |
| C5724 | PI | Inhibitor    | 174 | <chem>C1CCn2nnc2CC1</chem>                                                                                                                                             |
| C5725 | PI | Noninhibitor | 174 | <chem>O[C@@H](CC(=O)O)[C@@H](CC(C)C)NC(=O)[C@@H](C)NC(=O)C[C@@H](O)[C@H](CC(C)C)NC(=O)[C@@H](NC(=O)[C@H](NC(=O)CC(C)C)(C)C)(C)C</chem>                                 |
| C5726 | PI | Noninhibitor | 174 | <chem>N(C(=O)C)c1ccc(OCC)cc1</chem>                                                                                                                                    |
| C5727 | PI | Noninhibitor | 174 | <chem>Nc1nc(N)c(cc1)/N=N/c1cccc1</chem>                                                                                                                                |
| C5728 | PI | Noninhibitor | 174 | <chem>Oc1c(OC)cc(cc1)C(=O)OC1C[C@H]2CC[C@@H](C1)N2C</chem>                                                                                                             |
| C5729 | PI | Noninhibitor | 174 | <chem>N(Cc1ncccc1)C(=O)c1cc(C(=O)NCc2ncccc2)c(OC)cc1</chem>                                                                                                            |
| C5730 | PI | Noninhibitor | 174 | <chem>O[C@@]12C[C@@H]3O[C@@]43C(=O)O[C@H]([C@H]3OC(=O)[C@H]1[C@H]3C(=C)C)[C@@]24C</chem>                                                                               |
| C5731 | PI | Noninhibitor | 174 | <chem>O/C(=C\1/N(C)S(=O)(=O)c2cccc2C1=O)/Nc1cccc1</chem>                                                                                                               |
| C5732 | PI | Noninhibitor | 174 | <chem>O[C@@H]1[C@H]2COC(=O)C2[C@@H](c2cc(OC)c(OC)c(OC)c2)c2c1cc1OCOc1c2</chem>                                                                                         |
| C5733 | PI | Noninhibitor | 174 | <chem>CCCCOc1ccc(OCCCN2CCOCC2)cc1</chem>                                                                                                                               |
| C5734 | PI | Noninhibitor | 174 | <chem>O[C@@H]1CC[C@]2(C)[C@H]3CC[C@@]4(C)[C@H](CC[C@H]4C(=O)C)[C@@H]3CC=C2C1</chem>                                                                                    |
| C5735 | PI | Noninhibitor | 174 | <chem>OC(CCN1CCCCC1)(c1cccc1)c1cccc1</chem>                                                                                                                            |
| C5736 | PI | Noninhibitor | 174 | <chem>Oc1c(cc(SC(C)(C)Se2cc(c(O)c(e2)C(C)(C)C(C)C)cc1C(C)(C)C(C)C)C(C)C)</chem>                                                                                        |
| C5737 | PI | Noninhibitor | 174 | <chem>CCN(CC)[C@H](C)CN1c2cccc2Sc2c1cccc2</chem>                                                                                                                       |
| C5738 | PI | Noninhibitor | 174 | <chem>[nH]1c(=O)cc(CCC)[nH]c1=S</chem>                                                                                                                                 |
| C5739 | PI | Noninhibitor | 174 | <chem>NC(=O)c1ncnc1</chem>                                                                                                                                             |
| C5740 | PI | Noninhibitor | 174 | <chem>OCc1enc(C)c(O)c1CO</chem>                                                                                                                                        |
| C5741 | PI | Noninhibitor | 174 | <chem>COc1c(C#N)c(=O)n(C)cc1</chem>                                                                                                                                    |
| C5742 | PI | Noninhibitor | 174 | <chem>CN1CCc2cc3c(OCO3)c3c2[C@@H]1Cc1cccc31</chem>                                                                                                                     |
| C5743 | PI | Noninhibitor | 174 | <chem>N1CCc2cc(OC)c(OC)cc2[C@H]1C</chem>                                                                                                                               |
| C5744 | PI | Noninhibitor | 174 | <chem>O=C1O[C@@]23C[C@@H](C=CC2=C1)N1CCCC[C@@H]31</chem>                                                                                                               |
| C5745 | PI | Noninhibitor | 174 | <chem>N(C1CCC(C)CC1)C(=O)N(CCC1)N=O</chem>                                                                                                                             |
| C5746 | PI | Noninhibitor | 174 | <chem>O[C@]1(C)C(=C)C/C(=C)/C(=O)O[C@H]2CCN3CC=C(COC1=O)C23</chem>                                                                                                     |
| C5747 | PI | Noninhibitor | 174 | <chem>O[C@@]12CC[C@H]3[C@H](C)[C@H]4CC[C@@H](C)CN4C[C@@H]3[C@@H]1C[C@@H]1[C@@H]2CC(=O)[C@@H]2CC(=O)CC[C@@]12C</chem>                                                   |
| C5748 | PI | Noninhibitor | 174 | <chem>O[C@H]1[C@@H](O[C@H]2[C@@H](C[C@@H](N)[C@@H](O[C@H]3OC(=CC[C@@H]3N)CN)[C@@H]2O)N)OC[C@@](C)(O)[C@@H]1NC</chem>                                                   |

|       |    |              |     |                                                                                                                                                         |
|-------|----|--------------|-----|---------------------------------------------------------------------------------------------------------------------------------------------------------|
| C5749 | PI | Noninhibitor | 174 | COe1c(OC)c2nc3c(cco3)c(OC)c2cc1                                                                                                                         |
| C5750 | PI | Noninhibitor | 174 | OC[C@H]1O[C@H](O)[C@H](NC(=O)N(C)N=O)[C@@H](O)C1O                                                                                                       |
| C5751 | PI | Noninhibitor | 174 | OC(=O)CCCC(=O)Nc1ccc(cc1)S(=O)(=O)Nc1nccs1                                                                                                              |
| C5752 | PI | Noninhibitor | 174 | Nc1ccc(cc1)S(=O)(=O)NC(=O)c1cccc1                                                                                                                       |
| C5753 | PI | Noninhibitor | 174 | Nc1ccc(cc1)S(=O)(=O)Nc1nnc(Cl)cc1                                                                                                                       |
| C5754 | PI | Noninhibitor | 174 | Nc1ccc(cc1)S(=O)(=O)Nc1cc(OC)nc(OC)n1                                                                                                                   |
| C5755 | PI | Noninhibitor | 174 | Nc1ccc(cc1)S(=O)(=O)Nc1nccc(C)n1                                                                                                                        |
| C5756 | PI | Noninhibitor | 174 | OCC(=O)[C@]1(O)CC[C@@H]2[C@@H]3CCCC4=CC(=O)C=C[C@@]4(C)[C@@H]3C(=O)C[C@@]12C                                                                            |
| C5757 | PI | Noninhibitor | 174 | Nc1ccc(cc1)S(=O)(=O)Nc1ncc(OC)cn1                                                                                                                       |
| C5758 | PI | Noninhibitor | 174 | Nc1ccc(cc1)S(=O)(=O)Nc1nc(C)cc(C)n1                                                                                                                     |
| C5759 | PI | Noninhibitor | 174 | Nc1ccc(cc1)S(=O)(=O)Nc1nnc(C)s1                                                                                                                         |
| C5760 | PI | Noninhibitor | 174 | Nc1ccc(cc1)S(=O)(=O)Nc1cccc1                                                                                                                            |
| C5761 | PI | Noninhibitor | 174 | Nc1ccc(cc1)S(=O)(=O)Nc1cc2ncnc2cc1                                                                                                                      |
| C5762 | PI | Noninhibitor | 174 | Nc1ccc(cc1)S(=O)(=O)Nc1c(C)c(C)no1                                                                                                                      |
| C5763 | PI | Noninhibitor | 174 | [nH]1c2ccccc2nc1c1c(OC)cc(cc1)S(=O)C                                                                                                                    |
| C5764 | PI | Noninhibitor | 174 | OC(=O)[C@H](C)c1ccc(cc1)C(=O)c1cccs1                                                                                                                    |
| C5765 | PI | Noninhibitor | 174 | OC(=O)CCCC(=O)OCC1(CCCC)C(=O)N(N(C1=O)c1cccc1)c1cccc1                                                                                                   |
| C5766 | PI | Noninhibitor | 174 | [nH]1c2cc(OC)ccc2c2c1[C@H]1C[C@H]3[C@H](C[C@@H](OC(=O)c4cc(OC)c(OC(=O)OCC)c(OC)c4)[C@@H](OC)C3C(=O)OC)CN1CC2                                            |
| C5767 | PI | Noninhibitor | 174 | O[C@@H]1[C@H]2[C@@H]3N4C[C@@]5(C)C[C@H](OC(=O)c6cccc6)[C@@H](OC(=O)C)[C@]63[C@@H]5[C@H]4C[C@@]32CC(=C)[C@H]1[C@H](OC(=O)C)[C@@H]63                      |
| C5768 | PI | Noninhibitor | 174 | Nc1nc(nc2cc(OC)c(OC)cc12)N1CCN(CC1)C(=O)[C@H]1CCCCO1                                                                                                    |
| C5769 | PI | Noninhibitor | 174 | O[C@@H](CNC(C)(C)C)c1cc(O)cc(O)c1                                                                                                                       |
| C5770 | PI | Noninhibitor | 174 | [nH]1c2ccccc2c2c1[C@H]1C[C@H]3[C@H](CN1CC2)C(C)OC=C3C(=O)OC                                                                                             |
| C5771 | PI | Noninhibitor | 174 | N1CCN=C1[C@H]1CCCc2ccccc12                                                                                                                              |
| C5772 | PI | Noninhibitor | 174 | C1CN2C[C@H](N=C2S1)c1cccc1                                                                                                                              |
| C5773 | PI | Noninhibitor | 174 | C1CCC2=Nc3ccccc3CN2C1                                                                                                                                   |
| C5774 | PI | Noninhibitor | 174 | O=c1n2CCCCc2nc2ccccc12                                                                                                                                  |
| C5775 | PI | Noninhibitor | 174 | [nH]1c2ccccc2nc1c1cscn1                                                                                                                                 |
| C5776 | PI | Noninhibitor | 174 | NS(=O)(=O)c1ccc(OC)c(c1)C(=O)NC[C@@H]1CCCN1CC                                                                                                           |
| C5777 | PI | Noninhibitor | 174 | OC(=O)c1cccc1S                                                                                                                                          |
| C5778 | PI | Inhibitor    | 174 | N(CCN(CC)CC)C(=O)c1c(OC)ccc(c1)S(=O)(=O)C                                                                                                               |
| C5779 | PI | Noninhibitor | 174 | CCS(=O)(=O)CCn1c(C)ncc1[N+](=O)[O-]                                                                                                                     |
| C5780 | PI | Noninhibitor | 174 | N(N1CCCCC1)C(=O)NS(=O)(=O)c1ccc(C)cc1                                                                                                                   |
| C5781 | PI | Noninhibitor | 174 | C(C#CCN1CCCC1)N1CCCC1                                                                                                                                   |
| C5782 | PI | Noninhibitor | 174 | OCC(=O)[C@]1(O)[C@@H](O)C[C@H]2[C@@H]3CCCC4=CC(=O)C=C[C@]4(C)[C@]3(F)C(O)C[C@@]12C                                                                      |
| C5783 | PI | Noninhibitor | 174 | NS(=O)(=O)c1c(Cl)cc2N[C@H](NS(=O)(=O)c2c1)C(Cl)C1                                                                                                       |
| C5784 | PI | Noninhibitor | 174 | OC(=O)[C@@H](Cc1cc(I)c(Oc2cc(I)c(O)cc2)c(I)c1)N                                                                                                         |
| C5785 | PI | Noninhibitor | 174 | N1CCN(Cc2c(OC)c(OC)c(OC)cc2)CC1                                                                                                                         |
| C5786 | PI | Noninhibitor | 174 | CN1C(=O)OC(C)(C)C1=O                                                                                                                                    |
| C5787 | PI | Noninhibitor | 174 | Cc1cc2c(o1)c(C)c1oc(=O)cc(C)c1c2                                                                                                                        |
| C5788 | PI | Noninhibitor | 174 | CO[C@@H]1C=C2CCN(C)[C@H]2[C@H]2[C@@H]1OC(=O)c1cc3c(OCO3)cc21                                                                                            |
| C5789 | PI | Inhibitor    | 174 | Fc1ccc(cc1)C(OCCN1CCN(CCCc2ccccc2)CC1)c1ccc(F)cc1                                                                                                       |
| C5790 | PI | Noninhibitor | 174 | O[C@H]1[C@@H](O)[C@@]2(O)[C@H](C[C@@]34O[C@@]5(O)[C@H](CC[C@@H]23)[C@]4(C)CC[C@@H]5OC(=O)c2cc(OC)c(OC)cc2)[C@H]2CN3[C@@H](C)CC[C@H]3[C@@](O)(O)[C@@H]12 |
| C5791 | PI | Noninhibitor | 174 | OC[C@H]1O[C@H](O)[C@H](O)[C@H]1O)n1cnc2c1nnc2N                                                                                                          |
| C5792 | PI | Noninhibitor | 174 | O[C@@]1(C[C@@]2(CC)CCCN3CCc4c([C@H]23)n1c1cccc41)C(=O)OC                                                                                                |
| C5793 | PI | Inhibitor    | 174 | CCOC(=O)C1=C[C@@]2(CC)CCCN3CCc4c([C@H]23)n1c1cccc41                                                                                                     |
| C5794 | PI | Noninhibitor | 174 | N(C1=NCCCS1)c1c(C)cccc1C                                                                                                                                |

|       |    |              |     |                                                                                                                 |
|-------|----|--------------|-----|-----------------------------------------------------------------------------------------------------------------|
| C5795 | PI | Noninhibitor | 174 | O[C@@H]1CC[C@H]2CN3CCc4c([nH]e5ccccc45)[C@H]3C[C@@H]2C1C(=O)O                                                   |
| C5796 | PI | Inhibitor    | 174 | O[C@H]1[C@H](C)/C=C(\C)/[C@@H](OC(=O)N)[C@H](OC)/C=C/C=C(\C)/C(=O)NC2=CC(=O)C(=C(C[C@H](C)C[C@@H]1OC)C2=O)OC    |
| C5797 | PI | Inhibitor    | 174 | Oc1cc2c(O)c(c1)NC(=O)/C=C/C=C[C@@H](C)[C@@H](OC(=O)N)/C=C/[C@@H](C)[C@H](OC)[C@H](C[C@@H](C)[C@H]2OC)OC)/C)     |
| C5798 | PI | Inhibitor    | 174 | O[C@H]1[C@H](C)/C=C(\C)/[C@H](OC(=O)N)[C@@H](OC)/C=C/C=C(\C)/C(=O)NC2=CC(=O)C(=C(C[C@H](C)C[C@@H]1OC)C2=O)NCC=C |
| C5799 | PI | Inhibitor    | 174 | N1c2c(cc(C)s2)C(=Nc2ccccc12)N1CCN(C)CC1                                                                         |
| C5800 | PI | Inhibitor    | 174 | OCCOCCN1CCN(CC1)C1=Nc2ccccc2Sc2ccccc12                                                                          |
| C5801 | PI | Noninhibitor | 174 | N(C)C(=O)O/N=C/C(C)(C)SC                                                                                        |
| C5802 | PI | Inhibitor    | 174 | N1C(=C([C@@H](c2ccccc2)[N+](=O)[O-])C(=C1C)C(=O)O[C@H]1CCCN(Cc2ccccc2)C1)C(=O)OC)C                              |
| C5803 | PI | Inhibitor    | 174 | N(/N=C(/C=C/c1ccc(cc1)C(F)(F)F)\C=C/c1ccc(cc1)C(F)(F)F)C1=NCC(C)(C)CN1                                          |
| C5804 | PI | Noninhibitor | 174 | N(CC)C(=O)Oe1ccccc1[N+](=O)[O-]                                                                                 |
| C5805 | PI | Noninhibitor | 174 | CC1(C)[C@H](C=C(C)Cl)[C@H]1C(=O)OCc1cc(Oc2ccccc2)ccc1                                                           |
| C5806 | PI | Noninhibitor | 174 | ClCC1(CCl)[C@@H]2C[C@H](C(Cl)(Cl)[C@@H]2Cl)/C1=C/Cl                                                             |
| C5807 | PI | Inhibitor    | 174 | COe1cc2c(SCCN(C2)C(=O)CCN2CCC(Cc3ccccc3)CC2)cc1                                                                 |
| C5808 | PI | Inhibitor    | 174 | CCCCCCCCCCCC(CCCN(C)CCc1cc(OC)ccc1)(C#N)c1cc(OC)ccc1                                                            |
| C5809 | PI | Inhibitor    | 174 | n1c(NCCc2ccccc2OC)c2OC)nc(c2c1cc(OC)c(OC)c2)N1CCc2cc(OC)c(OC)cc2C1                                              |
| C5810 | PI | Inhibitor    | 174 | n1c(c2c(nc1NCCc1ccc(c(c1)OC)OC)ccc(c2)C)N(Cc1ccccc1)C                                                           |
| C5811 | PI | Inhibitor    | 174 | c1ccccc2c1oc(cc2=O)C(=O)Nc1cc(OC)c(OC)cc1c1nnn(n1)c1ccc(CCN2CCc3cc(OC)c(OC)cc3C2)cc1                            |
| C5812 | PI | Inhibitor    | 174 | OC[C@H]1Oe2c(OC1c1ccc(OC)c(OC)c1)cc(cc2)c1c(O)c(=O)c2c(O)cc(OC)cc2o1                                            |
| C5813 | PI | Inhibitor    | 174 | OC[C@H]1Oe2c(OC1c1ccc(OC)c(OC)c1)cc(cc2)c1c(OC)c(=O)c2c(O)cc(O)cc2o1                                            |
| C5814 | PI | Inhibitor    | 174 | OC[C@H]1Oe2c(OC1c1ccc(OC)c(OC)c1)cc(cc2)c1c(OC)c(=O)c2c(O)cc(OC)cc2o1                                           |
| C5815 | PI | Inhibitor    | 174 | OC[C@H]1Oe2c(OC1c1ccc(OC)c(OC)c1)cc(cc2)c1c(O)c(=O)c2c(OC)cc(OC)cc2o1                                           |
| C5816 | PI | Inhibitor    | 174 | OC[C@H]1Oe2c(OC1c1ccc(O)c(O)c1)cc(cc2)c1c(O)c(=O)c2c(O)cc(O)cc2o1                                               |
| C5817 | PI | Inhibitor    | 174 | OC[C@@H]1Oe2ccc(cc2OC1c1ccc(O)c(OC)c1)[C@H]1Oe2c(C(=O)[C@@H]1O)c(O)cc(OCc1ccccc1)e2                             |
| C5818 | PI | Inhibitor    | 174 | OC[C@H]1Oe2c(OC1c1ccc(O)c(OC)c1)cc(cc2)c1c(O)c(=O)c2c(O)cc(O)cc2o1                                              |
| C5819 | PI | Inhibitor    | 174 | OC[C@H]1Oe2c(OC1c1ccc(O)c(OC)c1)cc(cc2)c1c(O)c(=O)c2c(O)cc(OCc3ccccc3)cc2o1                                     |
| C5820 | PI | Inhibitor    | 174 | OC[C@H]1Oe2c(OC1c1ccc(O)c(OC)c1)cc(cc2)c1c(O)c(=O)c2c(O)cc(OC)cc2o1                                             |
| C5821 | PI | Inhibitor    | 174 | OC[C@H]1Oe2c(OC1c1ccc(OC)c(OC)c1)cc(cc2)c1c(O)c(=O)c2c(O)cc(O)cc2o1                                             |
| C5822 | PI | Inhibitor    | 174 | OC[C@H]1Oe2c(OC1c1ccc(O)c(OC)c1)cc(cc2)c1c(OC)c(=O)c2c(O)cc(OC)cc2o1                                            |
| C5823 | PI | Inhibitor    | 174 | CC(=O)Oe1c(O)cc2oc(cc(=O)c2c1O)c1ccccc1                                                                         |
| C5824 | PI | Noninhibitor | 174 | OC(=O)CCC(=O)O[C@H]1O[C@H]2O[C@@]3(C)CC[C@H]4[C@H](C)CC[C@@H]([C@H]1C)[C@@]24OO3                                |
| C5825 | PI | Inhibitor    | 174 | COe1c(OC)c(OC)c2c(=O)cc(oc2c1)c1ccccc1                                                                          |
| C5826 | PI | Inhibitor    | 174 | COe1c(OC)c(O)c2c(=O)cc(oc2c1)c1ccccc1                                                                           |
| C5827 | PI | Inhibitor    | 174 | Oe1c2c(=O)ccc(oc2cc2c1OCO2)c1ccccc1                                                                             |
| C5828 | PI | Inhibitor    | 174 | COe1c2c(=O)ccc(oc2cc2c1OCO2)c1ccccc1                                                                            |
| C5829 | PI | Inhibitor    | 174 | c1(c2c(cc(c1OC(=O)C)Oe1ccccc1)oc(cc2=O)c1ccccc1)OC(=O)C                                                         |
| C5830 | PI | Inhibitor    | 174 | c1(c2c(cc(c1Oe1ccccc1)O)oc(cc2=O)c1ccccc1)O                                                                     |
| C5831 | PI | Inhibitor    | 174 | COe1c2c(=O)ccc(oc2cc2c1OC(O2)(c1ccccc1)c1ccccc1)c1ccccc1                                                        |
| C5832 | PI | Inhibitor    | 174 | CCCOe1c(O)cc2oc(cc(=O)c2c1O)c1ccccc1                                                                            |
| C5833 | PI | Inhibitor    | 174 | CCOe1c(O)cc2oc(cc(=O)c2c1O)c1ccccc1                                                                             |
| C5834 | PI | Inhibitor    | 174 | CC(=O)Oe1c(OC(=O)C)c(O)c2c(=O)cc(oc2c1)c1ccccc1                                                                 |
| C5835 | PI | Noninhibitor | 174 | Oe1ccc(cc1)c1coe2cc(O)ccc2c1=O                                                                                  |
| C5836 | PI | Inhibitor    | 174 | CCOe1c(OC)cc2oc(cc(=O)c2c1O)c1ccccc1                                                                            |
| C5837 | PI | Inhibitor    | 174 | CCCOe1c(OC)cc2oc(cc(=O)c2c1OC)c1ccccc1                                                                          |
| C5838 | PI | Inhibitor    | 174 | CCCOe1c(OCCC)c(O)c2c(=O)cc(oc2c1)c1ccccc1                                                                       |
| C5839 | PI | Inhibitor    | 174 | CCOe1c(OCC)c(O)c2c(=O)cc(oc2c1)c1ccccc1                                                                         |
| C5840 | PI | Inhibitor    | 174 | CCCCCCCCOe1c(OCCCCCCC)c(O)c2c(=O)cc(oc2c1)c1ccccc1                                                              |



|       |    |              |     |                                                                     |
|-------|----|--------------|-----|---------------------------------------------------------------------|
| C5841 | PI | Inhibitor    | 174 | CCCCCOe1c(OCCCCC)c(O)c2c(=O)cc(oc2c1)c1cccc1                        |
| C5842 | PI | Inhibitor    | 174 | CCCCOe1c(OCCCC)c(O)c2c(=O)cc(oc2c1)c1cccc1                          |
| C5843 | PI | Inhibitor    | 174 | CC(=O)Oe1c(OC(=O)C)c(OC(=O)C)c2c(=O)cc(oc2c1)c1cccc1                |
| C5844 | PI | Inhibitor    | 174 | CCCCCOe1c(OCCCCC)c(OC)c2c(=O)cc(oc2c1)c1cccc1                       |
| C5845 | PI | Inhibitor    | 174 | CCCCCOe1c(OCCCCC)c(OC)c2c(=O)cc(oc2c1)c1cccc1                       |
| C5846 | PI | Inhibitor    | 174 | Oe1c(CNCC)cc(cc1)Nc1cnc2cc(Cl)ccc12                                 |
| C5847 | PI | Inhibitor    | 174 | CCOe1c(OCC)c(OC)c2c(=O)cc(oc2c1)c1cccc1                             |
| C5848 | PI | Inhibitor    | 174 | CCCCOe1c(OCCCC)c(OC)c2c(=O)cc(oc2c1)c1cccc1                         |
| C5849 | PI | Inhibitor    | 174 | COe1c(OC(=O)C)c(OC)c2c(=O)cc(oc2c1)c1cccc1                          |
| C5850 | PI | Inhibitor    | 174 | CC(=O)Oe1c(OCc2cccc2)cc2oc(cc(=O)c2c1OC(=O)C)c1cccc1                |
| C5851 | PI | Inhibitor    | 174 | CC(=O)Oe1c(OCc2cccc2)c(O)c2c(=O)cc(oc2c1)c1cccc1                    |
| C5852 | PI | Inhibitor    | 174 | CC(=O)Oe1c(OC(=O)C)c(OCc2cccc2)c2c(=O)cc(oc2c1)c1cccc1              |
| C5853 | PI | Inhibitor    | 174 | CC(=O)Oe1c(OC(=O)C)c(Br)c2oc(cc(=O)c2c1O)c1cccc1                    |
| C5854 | PI | Inhibitor    | 174 | O[C@@H](COe1c(ccc1)C(=O)CCc1cccc1)CN1CCN(CC1)c1cccc(C)c1C           |
| C5855 | PI | Inhibitor    | 174 | Clc1c(ccc1)c1nc2c(ccc2)c(n1)N1CCCC1                                 |
| C5856 | PI | Inhibitor    | 174 | O[C@H](COe1c(ccc1)C(=O)CCc1cccc1)CN(CCC)C(=O)c1cccc1                |
| C5857 | PI | Noninhibitor | 174 | Oe1c2C(=O)C=C(C(=O)c2cc(C)c1)c1c(C)cc2C(=O)C=CC(=O)c2c1O            |
| C5858 | PI | Inhibitor    | 174 | O[C@H](COe1c(ccc1)C(=O)CC)CN1CCC(O)(CC1)c1cccc1                     |
| C5859 | PI | Inhibitor    | 174 | O[C@H](COe1c(ccc1)C(=O)Cc1cccc2c1cccc2)CN1CCC(O)(CC1)c1cccc1        |
| C5860 | PI | Inhibitor    | 174 | O[C@@H](COe1cc(ccc1)C(=O)C)CN1CCCCC1                                |
| C5861 | PI | Inhibitor    | 174 | O[C@@H](COe1cc(ccc1)C(=O)C)CN1CCN(CC1)c1ccc(F)cc1                   |
| C5862 | PI | Inhibitor    | 174 | O[C@@H](COe1c(ccc1)C(=O)CCc1cccc1)CN1CCN(CC1)C(=O)c1cccc1           |
| C5863 | PI | Inhibitor    | 174 | O[C@H](COe1ccc(OC)cc1)CN1CCN(CC1)c1ccc(F)cc1                        |
| C5864 | PI | Inhibitor    | 174 | NC1=C(C#N)[C@H](c2e(O1)n[nH]c2c1ccc(C)cc1)c1ccc(cc1)N(C)C           |
| C5865 | PI | Inhibitor    | 174 | O[C@H](COe1c(ccc1)C(=O)CCc1cccc1)CN[C@H](C(C)C)c1cccc1              |
| C5866 | PI | Noninhibitor | 174 | Oe1cc2c3c(oc(=O)c4cc(O)c(O)c(oc2=O)c34)c1O                          |
| C5867 | PI | Inhibitor    | 174 | O[C@H](COe1c(cc(Cl)c(Cl)c1)C(=O)CCc1cccc1)CN1CCN(CC1)c1cccc1C       |
| C5868 | PI | Inhibitor    | 174 | O[C@H](COe1c(cc(C)cc1)C(=O)C)CN1CCCCC1                              |
| C5869 | PI | Inhibitor    | 174 | O[C@H](COe1cccc2c1C(=O)CC2=C)CN1CCCCC1                              |
| C5870 | PI | Inhibitor    | 174 | O[C@H](COe1c(ccc1)C(=O)CCc1cccc1)CN[C@@H](c1cccc1)C(C)(C)C          |
| C5871 | PI | Inhibitor    | 174 | O[C@@H](COe1cccc2c1C(=O)CC2=O)CN1CCCCC1                             |
| C5872 | PI | Inhibitor    | 174 | O[C@H](COe1cccc2c1C(=O)[C@H](C2=C)c1cccc1)CN1CCCCC1                 |
| C5873 | PI | Inhibitor    | 174 | O[C@H](COe1cccc2c1C(=O)[C@H](C2=O)c1cccc1)CN1CCCCC1                 |
| C5874 | PI | Inhibitor    | 174 | O[C@@H](COe1cccc2c1C(=O)[C@@H](C2=C)c1cccc1)CN1CCN(CC1)c1cccc(C)c1C |
| C5875 | PI | Noninhibitor | 174 | O=C1CC(CCN2CCCC2)Oe2cccc12                                          |
| C5876 | PI | Noninhibitor | 174 | OC(=O)/C=C/c1cc(OC)c(O)cc1                                          |
| C5877 | PI | Noninhibitor | 174 | OC(=O)COe1cccc1C(=O)CCc1cccc1                                       |
| C5878 | PI | Inhibitor    | 174 | O[C@H](COe1cccc(c1)C(=O)C)CN1CCN(CC1)c1c(C)c(C)ccc1                 |
| C5879 | PI | Inhibitor    | 174 | O[C@@H](COe1cccc(c1)C(=O)C)CN1CCN(CC1)c1c(C)ccc1                    |
| C5880 | PI | Inhibitor    | 174 | O[C@H](COe1cccc1C(=O)C)CN1CCN(CC1)c1c(C)c(C)ccc1                    |
| C5881 | PI | Inhibitor    | 174 | O=C([C@@H]1Oe2cccc2[C@H]1Cc1cccc1)N1CCCCC1                          |
| C5882 | PI | Noninhibitor | 174 | C[C@H]1[C@@H](Oe2c1cccc2)C(=O)N1CCCCC1                              |
| C5883 | PI | Inhibitor    | 174 | C([C@@H]1Oe2cccc2[C@H]1Cc1cccc1)N1CCCCC1                            |
| C5884 | PI | Inhibitor    | 174 | N(C(=O)c1ccc(OCCCC)cc1)c1cc2c(cc1)nc(SCc1c(C)c(C(=O)C)c(C)cc1C)s2   |
| C5885 | PI | Inhibitor    | 174 | N(C(=O)CCc1cccc1)c1cc2c(cc1)nc(SCc1c(C)c(C(=O)C)c(C)cc1C)s2         |
| C5886 | PI | Inhibitor    | 174 | N(C(=O)c1cccc2c1cccc2)c1cc2c(cc1)nc(SCc1c(C)c(C(=O)C)c(C)cc1C)s2    |

|       |    |              |     |                                                                                        |
|-------|----|--------------|-----|----------------------------------------------------------------------------------------|
| C5887 | PI | Inhibitor    | 174 | <chem>N(C(=O)C1=C(C)NC(=S)N[C@H]1c1cccc1)c1c(OCC)cccc1</chem>                          |
| C5888 | PI | Inhibitor    | 174 | <chem>O[C@@H](COc1ccc(cc1)C(=O)CCc1cccc1)CN1CCN(CC1)c1cccc(C)c1C</chem>                |
| C5889 | PI | Inhibitor    | 174 | <chem>c1(cc(ccc1C(=O)CCc1cccc1)OC)OCC(=O)CN1CCN(CC1)c1c(cccc1)C</chem>                 |
| C5890 | PI | Inhibitor    | 174 | <chem>O[C@H](COc1c(cc(C)cc1)C(=O)C)CN1CCN(CC1)c1cccc1C</chem>                          |
| C5891 | PI | Inhibitor    | 174 | <chem>O[C@@H](COc1c(cccc1)C(=O)C)CN1CCN(CC1)c1cccc1C</chem>                            |
| C5892 | PI | Inhibitor    | 174 | <chem>O[C@@H](COc1c(ccc(C)c1)C(=O)C)CN1CCN(CC1)c1cccc1C</chem>                         |
| C5893 | PI | Inhibitor    | 174 | <chem>O[C@@H](COc1c(cc(Cl)c(Cl)c1)C(=O)C)CN1CCN(CC1)c1cccc1C</chem>                    |
| C5894 | PI | Noninhibitor | 174 | <chem>N(NC(=O)c1nn(C)cc1)C(=C)c1ccnn1C</chem>                                          |
| C5895 | PI | Inhibitor    | 174 | <chem>O[C@H](COc1c(ccc(OC)c1)C(=O)CCc1ccc(cc1)N(C)C)CN1CCN(CC1)c1cccc1C</chem>         |
| C5896 | PI | Noninhibitor | 174 | <chem>Oc1ccc(cc1)c1coc2cc(O)cc(O)c2c1=O</chem>                                         |
| C5897 | PI | Inhibitor    | 174 | <chem>O[C@H](COc1ccc(cc1)C(=O)C)CNCCC(c1cccc1)c1cccc1</chem>                           |
| C5898 | PI | Inhibitor    | 174 | <chem>O[C@H](COc1cc(ccc1)C(=O)CCc1cccc1)CN1CCN(CC1)c1cccc1C</chem>                     |
| C5899 | PI | Inhibitor    | 174 | <chem>O[C@@H](COc1cc(ccc1)C(=O)CCc1cccc1)CNCCC(c1cccc1)c1cccc1</chem>                  |
| C5900 | PI | Inhibitor    | 174 | <chem>O[C@@H](COc1cc(ccc1)C(=O)CCc1cccc1)CN1CCOCC1</chem>                              |
| C5901 | PI | Inhibitor    | 174 | <chem>O[C@H](COc1ccc(cc1)C(=O)CCc1cccc1)CNCCC(c1cccc1)c1cccc1</chem>                   |
| C5902 | PI | Noninhibitor | 174 | <chem>N(/N=C/c1ccnc1)c1nnc(nn1)n1nc(C)cc1C</chem>                                      |
| C5903 | PI | Noninhibitor | 174 | <chem>OC[C@H](O)Cc1cc(OC)c(OC)cc1</chem>                                               |
| C5904 | PI | Noninhibitor | 174 | <chem>N(C(=O)C(=O)N1CCCCC1)/N=C/c1c(F)cccc1Cl</chem>                                   |
| C5905 | PI | Inhibitor    | 174 | <chem>O[C@@H](COc1c(cccc1)C(=O)CCc1ccc(cc1)N(C)C)CN1CCN(CC1)c1cccc1C</chem>            |
| C5906 | PI | Noninhibitor | 174 | <chem>Nc1ccc(cc1)C(=O)OCCOCC</chem>                                                    |
| C5907 | PI | Noninhibitor | 174 | <chem>OC[C@H]1O[C@@H](Oc2cccc3cc4c(C(=O)OC4)c(O)c23)[C@@H](O)[C@H](O)[C@@H]1O</chem>   |
| C5908 | PI | Noninhibitor | 174 | <chem>CN(C)c1ccc(cc1)c1nc(nc(n1)C(F)(F)F)C(F)(F)F</chem>                               |
| C5909 | PI | Inhibitor    | 174 | <chem>O[C@@H](COc1c(cccc1)C(=O)CCc1cccc1)CN1CCCCC1</chem>                              |
| C5910 | PI | Inhibitor    | 174 | <chem>O[C@H](COc1c(cccc1)C(=O)CCc1cccc1)CN(C(C)C)C(C)C</chem>                          |
| C5911 | PI | Inhibitor    | 174 | <chem>O[C@@H](COc1c(cccc1)C(=O)CC)CN1CCCCC1</chem>                                     |
| C5912 | PI | Inhibitor    | 174 | <chem>O[C@H](COc1c(cccc1)C(=O)CCc1cccc1)CN1CCN(CC1)c1cccc1</chem>                      |
| C5913 | PI | Inhibitor    | 174 | <chem>c1cc(c(cc1)OC[C@@H](CN1CCN(CC1)c1c(cccc1)OC)O)C(=O)CCc1cccc1</chem>              |
| C5914 | PI | Inhibitor    | 174 | <chem>O[C@H](COc1c(cccc1)C(=O)CCc1cccc1)CN1CCN(CC1)c1cccc(OC)c1</chem>                 |
| C5915 | PI | Noninhibitor | 174 | <chem>O[C@H](C(Cl)(Cl)Cl)P(=O)(OC)OC</chem>                                            |
| C5916 | PI | Inhibitor    | 174 | <chem>O[C@H](COc1c(cccc1)C(=O)CCc1cccc1)CN1CCN(CC1)c1ccc(OC)cc1</chem>                 |
| C5917 | PI | Inhibitor    | 174 | <chem>O[C@H](COc1c(cccc1)C(=O)CCc1cccc1)CN1CCN(CC1)c1cccc1C</chem>                     |
| C5918 | PI | Inhibitor    | 174 | <chem>O[C@@H](COc1c(cccc1)C(=O)CCc1cccc1)CN(C)CCC</chem>                               |
| C5919 | PI | Inhibitor    | 174 | <chem>O[C@H](COc1c(cccc1)C(=O)CCc1cccc1)CN1CCOCC1</chem>                               |
| C5920 | PI | Inhibitor    | 174 | <chem>O[C@H](COc1c(cccc1)C(=O)CCc1cccc1)CN1CCC(O)(CC1)c1cccc1</chem>                   |
| C5921 | PI | Inhibitor    | 174 | <chem>O[C@@H](COc1ccc(cc1)C(=O)CCc1cccc1)CN1CCCCC1</chem>                              |
| C5922 | PI | Inhibitor    | 174 | <chem>C(Cc1c(CCc2ccccc2)c2c(o1)cccc2)N1CCCCC1</chem>                                   |
| C5923 | PI | Inhibitor    | 174 | <chem>O[C@H](CNCCC)c1c(CC)c2c(o1)cccc2</chem>                                          |
| C5924 | PI | Inhibitor    | 174 | <chem>O[C@@H](CNCCC)c1c(CCc2ccccc2)c2c(o1)cccc2</chem>                                 |
| C5925 | PI | Inhibitor    | 174 | <chem>O[C@H](COc1c(cccc1)C(=O)CCc1cccc1)CN1CCC(Cc2ccccc2)CC1</chem>                    |
| C5926 | PI | Noninhibitor | 174 | <chem>O[C@@H](COc1cc(ccc1)C(=O)C)CN1CCOCC1</chem>                                      |
| C5927 | PI | Inhibitor    | 174 | <chem>O[C@@H](COc1c(cc(O)cc1)C(=O)CCc1cccc1)CN(CCC)CCC</chem>                          |
| C5928 | PI | Inhibitor    | 174 | <chem>O[C@@H](COc1cc(ccc1)C(=O)CCc1cccc1)CN1CCCCC1</chem>                              |
| C5929 | PI | Inhibitor    | 174 | <chem>O[C@H](COc1cccc2c1cccn2)CN1CCN(CC1)C1c2ccccc2[C@H]2[C@H](c3c1cccc3)C2(F)F</chem> |
| C5930 | PI | Inhibitor    | 174 | <chem>O[C@@H](COc1ccc(cc1)C(=O)CCc1cccc1)CN1CCOCC1</chem>                              |
| C5931 | PI | Inhibitor    | 174 | <chem>O[C@@H](COc1ccc(cc1)C(=O)CCc1cccc1)CN(CCC)CCC</chem>                             |
| C5932 | PI | Inhibitor    | 174 | <chem>O[C@H](COc1cccc1[C@@H](O)CCc1cccc1)CN(CCC)CCC</chem>                             |

|       |    |              |     |                                                                                                                    |
|-------|----|--------------|-----|--------------------------------------------------------------------------------------------------------------------|
| C5933 | PI | Inhibitor    | 174 | <chem>O[C@@H](COc1cccc1[C@H](CCc1cccc1)OC)CN(CCC)CCC</chem>                                                        |
| C5934 | PI | Inhibitor    | 174 | <chem>O[C@H](COc1cccc1C(=O)CCc1cccc1)CNCC(c1cccc1)c1cccc1</chem>                                                   |
| C5935 | PI | Inhibitor    | 174 | <chem>O[C@H](COc1cccc1C(=O)CCc1cccc2c1cccc2)CNCCC(c1cccc1)c1cccc1</chem>                                           |
| C5936 | PI | Inhibitor    | 174 | <chem>O[C@@@H](CN1CCN(CC1)C(c1cccc1)c1cccc1)c1cc(OC)c(OC)cc1</chem>                                                |
| C5937 | PI | Inhibitor    | 174 | <chem>O=C(CCc1cccc1)c1cccc1OCCCN1CCCCC1</chem>                                                                     |
| C5938 | PI | Inhibitor    | 174 | <chem>O=C(CCc1cccc1)c1cccc1OCCN1CCCCC1</chem>                                                                      |
| C5939 | PI | Inhibitor    | 174 | <chem>O=C(CCc1cccc1)c1cccc1OCCCCN1CCCCC1</chem>                                                                    |
| C5940 | PI | Inhibitor    | 174 | <chem>O=C(CCc1cccc1)c1cccc1OCCCCCN1CCCCC1</chem>                                                                   |
| C5941 | PI | Inhibitor    | 174 | <chem>O=C(CCc1cccc1)c1cccc1OCCCCCN1CCCCC1</chem>                                                                   |
| C5942 | PI | Inhibitor    | 174 | <chem>O=C(CCc1cccc1)c1cccc1OCCCCCCCCN1CCCCC1</chem>                                                                |
| C5943 | PI | Inhibitor    | 174 | <chem>O[C@@@H](COc1c(ccc1)[C@H](CCc1cccc1)OC)CNCCCC(c1cccc1)c1cccc1</chem>                                         |
| C5944 | PI | Inhibitor    | 174 | <chem>O[C@@@H](COc1c(ccc1)[C@@H](O)CCc1cccc1)CN1CCOCC1</chem>                                                      |
| C5945 | PI | Inhibitor    | 174 | <chem>O[C@@@H](COc1c(cc(Oc2cccc2)cc1)C(=O)CCc1cccc1)CNC(C)C</chem>                                                 |
| C5946 | PI | Inhibitor    | 174 | <chem>O[C@H](COc1c(cc(O)cc1)C(=O)CCc1cccc1)CN1CCCCC1</chem>                                                        |
| C5947 | PI | Inhibitor    | 174 | <chem>O[C@@@H](COc1c(ccc1)C(=O)CCc1cccc1)CNCCCC(c1cccc1)c1cccc1</chem>                                             |
| C5948 | PI | Inhibitor    | 174 | <chem>O[C@H](COc1c(ccc1)C(=O)CCc1cccc1)CNC1CCCCC1</chem>                                                           |
| C5949 | PI | Inhibitor    | 174 | <chem>N1[C@@H](N(c2ccc(Oc3cccc3)cc2)C(=O)c2c1cccc2)c1ccc(OC)cc1</chem>                                             |
| C5950 | PI | Inhibitor    | 174 | <chem>N1[C@H](N(c2ccc(cc2)C(C)(C)C)C(=O)c2cccc12)c1ccc2OCc2c1</chem>                                               |
| C5951 | PI | Inhibitor    | 174 | <chem>N1[C@@H](N(c2ccc(CC)cc2)C(=O)c2cccc12)c1ccc(OCC(C)C)cc1</chem>                                               |
| C5952 | PI | Noninhibitor | 174 | <chem>N1[C@@H](N(c2ccc(CC)cc2)C(=O)c2cccc12)c1ccc(OCc2cccc2)cc1</chem>                                             |
| C5953 | PI | Inhibitor    | 174 | <chem>N1[C@H](N(c2ccc(Cl)cc2)C(=O)c2c1cccc2)c1ccc(cc1)[C@@H](C)CC</chem>                                           |
| C5954 | PI | Inhibitor    | 174 | <chem>N1[C@@H](N(c2ccc(cc2)[C@H](C)CC)C(=O)c2cccc12)c1ccc(cc1)C(C)C</chem>                                         |
| C5955 | PI | Inhibitor    | 174 | <chem>CCCCSe1nc2c(c(=O)n1CC=C)C1(CCCC1)Cc1e2cccc1</chem>                                                           |
| C5956 | PI | Inhibitor    | 174 | <chem>O[C@H](COc1c(cc(O)cc1)C(=O)CCc1cccc1)CN(C(C)C)C(C)C</chem>                                                   |
| C5957 | PI | Inhibitor    | 174 | <chem>O[C@H](COc1c(ccc1)[C@H](CCc1cccc1)OC(C)C)CN1CCCCC1</chem>                                                    |
| C5958 | PI | Inhibitor    | 174 | <chem>O[C@H](COc1c(ccc1)C(=O)C)CN1CCC(Cc2cccc2)CC1</chem>                                                          |
| C5959 | PI | Inhibitor    | 174 | <chem>O[C@H](COc1c(ccc1)C(=O)C)CN1CCC(O)(CC1)c1cccc1</chem>                                                        |
| C5960 | PI | Inhibitor    | 174 | <chem>O[C@H](COc1c(ccc1)C(=O)CCc1ccc(Cl)cc1)CN1CCN(CC1)c1c(C)cccc1</chem>                                          |
| C5961 | PI | Inhibitor    | 174 | <chem>O[C@@@H](COc1c(ccc1)C(=O)CCc1ccc(OC)cc1)CN1CCN(CC1)c1c(C)cccc1</chem>                                        |
| C5962 | PI | Noninhibitor | 174 | <chem>N=C(CCC(=O)N)c1n[nH]c(=S)n1c1ccc(OC)cc1</chem>                                                               |
| C5963 | PI | Inhibitor    | 174 | <chem>CC(=O)O[C@H](COc1c(ccc1)C(=O)CCc1cccc1)CN1CCCCC1</chem>                                                      |
| C5964 | PI | Inhibitor    | 174 | <chem>O[C@H](COc1c(cc(Cl)cc1)C(=O)CCc1cccc1)CN1CCN(CC1)c1cccc1C</chem>                                             |
| C5965 | PI | Inhibitor    | 174 | <chem>c1c(cc(c1)OCC[C@H](CN1CCN(CC1)c1c(ccc1)C)O)C(=O)CCc1cccc1)OC</chem>                                          |
| C5966 | PI | Inhibitor    | 174 | <chem>O[C@@@H](COc1c(cc(C)cc1)C(=O)CCc1cccc1)CN1CCN(CC1)c1cccc1C</chem>                                            |
| C5967 | PI | Inhibitor    | 174 | <chem>O[C@H](COc1c(ccc1)C(=O)CCc1cccc1)CN(C(=O)CC)c1cccc1</chem>                                                   |
| C5968 | PI | Inhibitor    | 174 | <chem>O=C(CCc1cccc1)c1c(OCCCN2CCOCC2)cccc1</chem>                                                                  |
| C5969 | PI | Inhibitor    | 174 | <chem>Fc1ccc(cc1)N1CCN(CCCCc2c(ccc2)C(=O)CCc2cccc2)CC1</chem>                                                      |
| C5970 | PI | Inhibitor    | 174 | <chem>O[C@H](CN1C[C@@H]2CCCC[C@H]2CC1C(=O)NC(C)(C)C)[C@H](Cc1cccc1)NC(=O)[C@@H](CC(=O)N)NC(=O)c1nc2cccc2cc1</chem> |
| C5971 | PI | Inhibitor    | 174 | <chem>C[C@H]1CC[C@@H]2COC3=C([C@H]2C1)C(=O)C1=C([C@H]2C[C@@H](C)CC[C@H]2C(C)(C)O1)C3=O</chem>                      |
| C5972 | PI | Inhibitor    | 174 | <chem>COc1ccc2[C@@H]3[C@H](COc2c1)C(C)(C)OC1=C3C(=O)C(=O)C2=C1OC(C)(C)[C@H]1COc3cc(OC)ccc3[C@@H]21</chem>          |
| C5973 | PI | Inhibitor    | 174 | <chem>COc1cccc(CCc2c(OCCN3CCN(C)CC3)cccc2)c1</chem>                                                                |
| C5974 | PI | Inhibitor    | 174 | <chem>COc1cccc(CCc2c(OCCCN3CCc4cc(OC)c(OC)cc4C3)cccc2)c1</chem>                                                    |
| C5975 | PI | Inhibitor    | 174 | <chem>COc1cccc(CCc2c(OCCN3CCN(CC3)c3cc(Cl)ccc3)cccc2)c1</chem>                                                     |
| C5976 | PI | Inhibitor    | 174 | <chem>COc1cccc(CCc2c(OCCCN3CCN(CC3)c3cc(Cl)ccc3)cccc2)c1</chem>                                                    |
| C5977 | PI | Inhibitor    | 174 | <chem>COc1cccc(CCc2c(OCCCN3CCN(CC3)c3cc(Cl)ccc3)cccc2)c1</chem>                                                    |
| C5978 | PI | Inhibitor    | 174 | <chem>COc1cccc(CCc2c(OCCCN3CCN(CC3)c3cc(Cl)ccc3)cccc2)c1</chem>                                                    |

|       |    |              |     |                                                                                                                         |
|-------|----|--------------|-----|-------------------------------------------------------------------------------------------------------------------------|
| C5979 | PI | Inhibitor    | 174 | COe1cccc(CCc2e(OCCCCN3CCN(CC3)e3ce(ccc3)C(F)(F)F)cccc2)c1                                                               |
| C5980 | PI | Inhibitor    | 174 | COe1cccc(CCc2e(OCCCCN3CCN(CC3)e3ce(ccc3)C(F)(F)F)cccc2)c1                                                               |
| C5981 | PI | Inhibitor    | 174 | COe1cccc(CCc2e(OCCCCN3CCN(CC3)e3e(OC)cccc3)cccc2)c1                                                                     |
| C5982 | PI | Inhibitor    | 174 | COe1cccc(CCc2e(OCCCCN3CCN(CC3)e3e(OC)cccc3)cccc2)c1                                                                     |
| C5983 | PI | Inhibitor    | 174 | COe1cccc(CCc2e(OCCCCN3CCN(CC3)e3e(OC)cccc3)cccc2)c1                                                                     |
| C5984 | PI | Inhibitor    | 174 | COe1cccc(CCc2e(OCCN3CCN(CC3)e3ecc(F)cc3)cccc2)c1                                                                        |
| C5985 | PI | Inhibitor    | 174 | COe1cccc(CCc2e(OCCCCN3CCN(CC3)e3ecc(F)cc3)cccc2)c1                                                                      |
| C5986 | PI | Inhibitor    | 174 | COe1cccc(CCc2e(OCCCCN3CCN(CC3)e3ecc(F)cc3)cccc2)c1                                                                      |
| C5987 | PI | Inhibitor    | 174 | COe1cccc(CCc2e(OCCCCN3CCN(CC3)e3ecc(F)cc3)cccc2)c1                                                                      |
| C5988 | PI | Inhibitor    | 174 | COe1cccc(CCc2e(OCCN3CCN(CC3)e3nccn3)cccc2)c1                                                                            |
| C5989 | PI | Inhibitor    | 174 | COe1cccc(CCc2e(OCCN3CCN(CC3)e3nccn3)cccc2)c1                                                                            |
| C5990 | PI | Inhibitor    | 174 | COe1cccc(CCc2e(OCCCCN3CCN(CC3)e3nccn3)cccc2)c1                                                                          |
| C5991 | PI | Inhibitor    | 174 | COe1cccc(CCc2e(OCCCCN3CCN(CC3)e3nccn3)cccc2)c1                                                                          |
| C5992 | PI | Inhibitor    | 174 | COe1cccc(CCc2e(OCCCCN3CCN(C)CC3)cccc2)c1                                                                                |
| C5993 | PI | Inhibitor    | 174 | COe1cccc(CCc2e(OCCN3CCe4cccc4C3)cccc2)c1                                                                                |
| C5994 | PI | Inhibitor    | 174 | COe1cccc(CCc2e(OCCN3CCe4cccc4C3)cccc2)c1                                                                                |
| C5995 | PI | Inhibitor    | 174 | COe1cccc(CCc2e(OCCCCN3CCe4cccc4C3)cccc2)c1                                                                              |
| C5996 | PI | Inhibitor    | 174 | COe1cccc(CCc2e(OCCCCN3CCe4cccc4C3)cccc2)c1                                                                              |
| C5997 | PI | Inhibitor    | 174 | COe1cccc(CCc2e(OCCN3CCe4cc(OC)c(OC)cc4C3)cccc2)c1                                                                       |
| C5998 | PI | Inhibitor    | 174 | N([C@H](C)c1ccccc1)C(=O)Nc1ccc(S[C@@H]2CC3=CC(=O)CC[C@]3(C)[C@H]3CC[C@]4(C)[C@H](CC[C@H]4C(=O)C)[C@H]23)cc1             |
| C5999 | PI | Inhibitor    | 174 | OCC12[C@@H]3C4[C@H]1N([C@@H]1C([C@H](N3C(=O)OC)C1(CO)[C@@H]4c1ccccc1)[C@@H]2c1ccccc1)C(=O)OC                            |
| C6000 | PI | Inhibitor    | 174 | OC(=O)CC[C@H](NC(=O)c1ccc(Cl)c(Cl)c1)C(=O)N(CCCCC)CCOC                                                                  |
| C6001 | PI | Inhibitor    | 174 | OCC12[C@H]3C4[C@@H]1N([C@H]1C([C@@H](N3C(=O)OC(C)(C)C)C1(CO)[C@H]4c1ccccc1)[C@@H]2c1ccccc1)C(=O)OC(C)(C)C               |
| C6002 | PI | Inhibitor    | 174 | OCC12[C@H]3C4[C@H](C5([C@@H](N([C@H]14)C(=O)Oe1ccccc1)C([C@H]2c1ccccc1)[C@@H]5N3C(=O)Oe1ccccc1)CO)c1ccccc1              |
| C6003 | PI | Inhibitor    | 174 | OCC12[C@@H]3C4[C@H]1N(Cc1ccccc1)[C@@H]1C([C@H](N3Cc3ccccc3)C1(CO)[C@H]4c1ccccc1)[C@@H]2c1ccccc1                         |
| C6004 | PI | Noninhibitor | 174 | OC(=O)Cc1ccccc1Nc1c(Cl)cccc1Cl                                                                                          |
| C6005 | PI | Noninhibitor | 174 | N(C(=O)OC)c1[nH]c2c(cc(SCC)cc2)n1                                                                                       |
| C6006 | PI | Noninhibitor | 174 | NC(=O)OC[C@](C)(CCC)COC(=O)NC(C)C                                                                                       |
| C6007 | PI | Noninhibitor | 174 | NCCO/N=C(/CCCCOC)c1ccc(cc1)C(F)F                                                                                        |
| C6008 | PI | Inhibitor    | 174 | N1C(=O)CCe2c1ccc(OCCCCe1nnnn1C1CCCCC1)c2                                                                                |
| C6009 | PI | Noninhibitor | 174 | N1C(=S)NC(=O)C(CC)([C@H](C)CCC)C1=O                                                                                     |
| C6010 | PI | Noninhibitor | 174 | OC(=O)/C=C/c1cc(O)c(O)cc1                                                                                               |
| C6011 | PI | Noninhibitor | 174 | N(C)CC(C)(C)c1ccccc1                                                                                                    |
| C6012 | PI | Noninhibitor | 174 | OC(=O)C(C)(C)O/N=C(/C(=O)N[C@@H]1[C@H](C)N(C1=O)S(=O)(=O)O)\c1csc(n1)N                                                  |
| C6013 | PI | Inhibitor    | 174 | CN(C)CCCOe1nn(Cc2ccccc2)c2c1ccccc2                                                                                      |
| C6014 | PI | Noninhibitor | 174 | OC(=O)C1=C(CSc2nnc(C)s2)CS[C@H]2N1C(=O)[C@@H]2NC(=O)Cn1cnn1                                                             |
| C6015 | PI | Inhibitor    | 174 | Oc1c2nc(Cl)nc2n(C)c(=O)n1C                                                                                              |
| C6016 | PI | Noninhibitor | 174 | Cc1c2c(c(e3c1cc[nH]e3)C)c1ccccc1n2                                                                                      |
| C6017 | PI | Noninhibitor | 174 | Oe1c(Cc2e(O)oc3ccccc3e2=O)c(=O)c2ccccc2o1                                                                               |
| C6018 | PI | Inhibitor    | 174 | O[C@@]12OC(C)(NC(=O)[C@H]3C[C@H]4[C@@H](Cc5c[nH]c6cccc4c56)N(C)C3)C(=O)N1[C@@H](Cc1ccccc1)C(=O)N1CCC[C@@H]21            |
| C6019 | PI | Noninhibitor | 174 | OCCNC(=O)Cn1cnc1[N+](=O)[O-]                                                                                            |
| C6020 | PI | Noninhibitor | 174 | Oc1cc(O)c2C(=O)C[C@@H](Oe2c1)c1cc(O)c(OC)cc1                                                                            |
| C6021 | PI | Noninhibitor | 174 | NS(=O)(=O)c1c(Cl)ccc(c1)C(=O)N[C@@H]1[C@@H](C)Nc2ccccc12                                                                |
| C6022 | PI | Inhibitor    | 174 | O[C@H]([C@@H](C)CCc1c(C(=O)c(O)c(C)cc1)[C@H](C)C(=O)[C@@H](CC)[C@H]1O[C@@](CC)(C[C@H]1C)[C@H]1CC[C@@](O)(CC)[C@@H](C)O1 |
| C6023 | PI | Noninhibitor | 174 | N(Cc1ccccc1)c1ncnc2c1[nH]cn2                                                                                            |
| C6024 | PI | Noninhibitor | 174 | Oc1ccc(cc1)C(=O)N/N=C/c1ccc(o1)[N+](=O)[O-]                                                                             |

|       |    |              |     |                                                                                                                |
|-------|----|--------------|-----|----------------------------------------------------------------------------------------------------------------|
| C6025 | PI | Noninhibitor | 174 | c1ccc(ccc1O)[C@H](CC)[C@H](CC)c1ccc(O)cc1                                                                      |
| C6026 | PI | Noninhibitor | 174 | O[C@@]1(CC[C@@@H]2[C@@@H]3CCCC4=CC(=O)CC[C@@H]4[C@@H]3CC[C@@@]12C)C#C                                          |
| C6027 | PI | Noninhibitor | 174 | On1cccc1=S                                                                                                     |
| C6028 | PI | Inhibitor    | 174 | Oe1c(cc(C)c(CC2=NCCN2)c1C)C(C)(C)C                                                                             |
| C6029 | PI | Noninhibitor | 174 | [N]=C(N)c1ccc(OCCCCCOe2ccc(cc2)C(=N)N)cc1                                                                      |
| C6030 | PI | Noninhibitor | 174 | O=C1C(C(=O)c2ccccc12)c1ccccc1                                                                                  |
| C6031 | PI | Noninhibitor | 174 | O[C@@@H]([C@H](C)N)c1ccccc1                                                                                    |
| C6032 | PI | Noninhibitor | 174 | OC(=O)[C@H]1N2[C@@@H](SC1(C)C)C(NC(=O)[C@H](NC(=O)N1CCN(CC)C(=O)C1=O)c1ccccc1)C2=O                             |
| C6033 | PI | Noninhibitor | 174 | Oe1ccc(/C=C/c2cc(O)cc(O)c2)cc1                                                                                 |
| C6034 | PI | Noninhibitor | 174 | OC[C@@]1(O)[C@H](C)C/C(=C/C)/C(=O)O[C@H]2CCN3CC=C(COC1=O)C23                                                   |
| C6035 | PI | Noninhibitor | 174 | C1CCN2C[C@H]3C[C@@@H](CN4CCCC[C@H]34)C2C1                                                                      |
| C6036 | PI | Inhibitor    | 174 | CC(=O)S[C@@@H]1CC2=CC(=O)CC[C@@@]2(C)[C@@@H]2CC[C@@@]3(C)[C@H](CC[C@@@]43CCC(=O)O4)[C@H]12                     |
| C6037 | PI | Noninhibitor | 174 | OC(=O)c1c(OC(=O)C)cc(cc1)C(F)(F)F                                                                              |
| C6038 | PI | Noninhibitor | 174 | O[C@@@H]1CC[C@@@]2(C)[C@H](CC[C@@]3(C)[C@@@H]2CC=C2[C@@@H]4[C@@@H](C)[C@H](C)CC[C@@]4(CC[C@@]32C)C(=O)O)C1(C)C |
| C6039 | PI | Noninhibitor | 174 | N1CCN=C1Cc1c(C)ccc(cc1C)C(C)(C)C                                                                               |
| C6040 | PI | Noninhibitor | 174 | N1=NC2=NC(=NC(=O)C2=N1)c1ccccc1OCCC                                                                            |
| C6041 | PI | Inhibitor    | 174 | Ne1ccc(cc1)c1cc(cc(c1)C(F)(F)F)C(F)(F)F                                                                        |
| C6042 | PI | Inhibitor    | 174 | OC1C[C@]2(C)[C@H](C)[C@H](C)[C@]2(OC(=O)c2ccco2)C(=O)C[C@@]1(C)[C@H]2CCC3=CC(=O)C=C[C@@@]3(C)[C@@]12C1         |
| C6043 | PI | Noninhibitor | 174 | N([C@@@H](C(C)C)C(=O)O[C@@@H](C#N)c1cc(Oc2ccccc2)ccc1)c1c(Cl)cc(cc1)C(F)(F)F                                   |
| C6044 | PI | Inhibitor    | 174 | CCCOe1c(OC)cc2oc(cc(=O)c2c1O)c1ccccc1                                                                          |
| C6045 | PI | Inhibitor    | 174 | COe1c2c(=O)cc(oc2cc(OC(=O)C)c1OC(=O)C)c1ccccc1                                                                 |
| C6046 | PI | Inhibitor    | 174 | O[C@@@H](COe1ccccc1C(=O)C)CN1CCN(CC1)c1ccccc1C                                                                 |
| C6047 | PI | Inhibitor    | 174 | O[C@H](COe1c(cc(OC)cc1)C(=O)C)CN1CCN(CC1)c1ccccc1C                                                             |
| C6048 | PI | Inhibitor    | 174 | [nH]1c2cc(OC)ccc2c1[C@H]1C[C@H]3[C@@@H](C[C@H](OC(=O)/C=C/c4cc(OC)c(OC)c(OC)c4)[C@@@H](OC)C3C(=O)OC)CN1CC2     |
| C6049 | PI | Inhibitor    | 174 | O[C@H](COe1c(cc(C(=O)C)c(C)c1)C(=O)C)CN1CCN(CC1)c1ccccc1C                                                      |
| C6050 | PI | Inhibitor    | 174 | O[C@H](COe1cc(ccc1)C(=O)CCe1ccccc1)CN1CCN(CC1)c1ccccc1C                                                        |
| C6051 | PI | Noninhibitor | 174 | Oe1c(cccc1OC)/C=N/NC(=O)C(=O)NC(C)(C)C                                                                         |
| C6052 | PI | Inhibitor    | 174 | O[C@@@H](COe1c(cccc1)C(=O)c1ccccc1)CN(CC)CC                                                                    |
| C6053 | PI | Inhibitor    | 174 | O[C@@@H](CN1CCN(CC1)c1ccccc1)C(=O)CCe1ccccc1                                                                   |
| C6054 | PI | Inhibitor    | 174 | O[C@H](COe1ccccc1C(=O)CCe1ccccc1)CNC(c1ccccc1)c1ccccc1                                                         |
| C6055 | PI | Inhibitor    | 174 | O=C(CCc1ccccc1)c1ccccc1OCCCCCCCCN1CCCCC1                                                                       |
| C6056 | PI | Inhibitor    | 174 | O[C@H](COe1c(cc(Oc2ccccc2)cc1)C(=O)CCe1ccccc1)CN1CCCCC1                                                        |
| C6057 | PI | Inhibitor    | 174 | O[C@@@H](COe1c(cc(Oc2ccccc2)cc1)C(=O)CCe1ccccc1)CN1CCN(Cc2ccccc2)CC1                                           |
| C6058 | PI | Noninhibitor | 174 | N(C)CCC[C@@@](C#N)(C(C)C)c1cc(OC)c(OC)cc1                                                                      |
| C6059 | PI | Inhibitor    | 174 | O[C@@@H](COe1c(cccc1)C(=O)CCe1ccc(C)cc1)CN1CCN(CC1)c1c(C)ccccc1                                                |
| C6060 | PI | Inhibitor    | 174 | COe1cccc(CCc2c(OCCCCN3CCc4cc(OC)c(OC)cc4C3)cccc2)c1                                                            |
| C6061 | PI | Inhibitor    | 174 | COe1cccc(CCc2c(OCCCCN3CCc4cc(OC)c(OC)cc4C3)cccc2)c1                                                            |
| C6062 | PI | Inhibitor    | 174 | COe1cccc(CCc2c(OCCCCN3CCN(C)CC3)cccc2)c1                                                                       |
| C6063 | PI | Inhibitor    | 174 | COe1cccc(CCc2c(OCCCCN3CCN(C)CC3)cccc2)c1                                                                       |
| C6064 | PI | Inhibitor    | 174 | N(CCC)C(=O)Nc1ccc(S[C@@@H]2CC3=CC(=O)CC[C@@]3(C)[C@H]3CC[C@@@]4(C)[C@H](CC[C@@H]4C(=O)C)[C@H]23)cc1            |
| C6065 | PI | Inhibitor    | 174 | N(CC)C(=O)Nc1ccc(S[C@@@H]2CC3=CC(=O)CC[C@@]3(C)[C@@@H]3CC[C@@@]4(C)[C@H](CC[C@@@H]4C(=O)C)[C@H]23)cc1          |
| C6066 | PI | Inhibitor    | 174 | CCCCc1ccc(cc1)C(=O)Nc1ccccc1C(=O)NCCN1CCc2cc(c(cc2C1)OC)OC                                                     |
| C6067 | PI | Inhibitor    | 174 | Ce1cccc(c1NC(=O)c1ccc(cc1)C(C)C)C(=O)NCCN1CCc2cc(c(cc2C1)OC)OC                                                 |
| C6068 | PI | Noninhibitor | 174 | NCCC[C@@@](C#N)(C(C)C)c1cc(OC)c(OC)cc1                                                                         |
| C6069 | PI | Inhibitor    | 174 | CC(C)c1ccc(cc1)C(=O)Nc1c(cccc1Cl)C(=O)NCCN1CCc2cc(c(cc2C1)OC)OC                                                |
| C6070 | PI | Inhibitor    | 174 | CC(C)c1ccc(cc1)C(=O)Nc1ccccc1C(=O)NCCN1CCc2cc(c(cc2C1)OC)OC)Cl                                                 |

|       |    |           |     |                                                                        |
|-------|----|-----------|-----|------------------------------------------------------------------------|
| C6071 | PI | Inhibitor | 174 | COe1cc2c(cc1OC)CN(CC2)CCNC(=O)c1cccc1NC(=O)c1ccc(cc1)Oe1cccc1          |
| C6072 | PI | Inhibitor | 174 | COe1cc2c(cc1OC)CN(CC2)CCNC(=O)c1cccc1NC(=O)c1ccc(cc1)C(=O)c1cccc1      |
| C6073 | PI | Inhibitor | 174 | CC(C)c1ccc(cc1)C(=O)Nc1ccc(cc1)C(=O)NCCN1CCc2cc(c(cc2C1)OC)OCN         |
| C6074 | PI | Inhibitor | 174 | COe1cc2c(cc1OC)CN(CC2)CCNC(=O)c1cccc1NC(=O)c1ccc(cc1)OC1CCCCC1         |
| C6075 | PI | Inhibitor | 174 | COe1cc2c(cc1OC)CN(CC2)CCNC(=O)c1cccc1NC(=O)c1ccc(cc1)OCe1cccc1         |
| C6076 | PI | Inhibitor | 174 | COe1cc2c(cc1OC)CN(CC2)CCc1ccc(cc1)NC(=O)c1cccc1NC(=O)c1cccc2e1cccc2    |
| C6077 | PI | Inhibitor | 174 | COe1cc2c(cc1OC)CN(CC2)CCNC(=O)c1cccc1NC(=O)c1ccc(cc1)c1cccc1           |
| C6078 | PI | Inhibitor | 174 | COe1cc2c(cc1OC)CN(CC2)CCc1ccc(cc1)NC(=O)c1cccc1NC(=O)c1cces1           |
| C6079 | PI | Inhibitor | 174 | Oe1c(OC)cc(cc1)[C@@](CCCN(C)CCc1cc(OC)c(OC)cc1)(C#N)C(C)C              |
| C6080 | PI | Inhibitor | 174 | COe1cc2c(cc1OC)CN(CC2)CCc1ccc(cc1)NC(=O)c1cccc1NC(=O)c1ccsc1           |
| C6081 | PI | Inhibitor | 174 | COe1cc2c(cc1OC)CN(CC2)CCc1ccc(cc1)NC(=O)c1cccc1NC(=O)c1ccoc1           |
| C6082 | PI | Inhibitor | 174 | Ce1ccc(cc1)C(=O)Nc1cccc1C(=O)Nc1ccc(cc1)CCN1CCc2cc(c(cc2C1)OC)OC       |
| C6083 | PI | Inhibitor | 174 | COe1cc2c(cc1OC)CN(CC2)CCc1ccc(cc1)NC(=O)c1cccc1NC(=O)c1cc2cccc2o1      |
| C6084 | PI | Inhibitor | 174 | COe1cc2c(cc1OC)CN(CC2)CCc1ccc(cc1)NC(=O)c1cccc1NC(=O)c1ccc2cccc2n1     |
| C6085 | PI | Inhibitor | 174 | CCC(=O)c1ncn(en1)C(=O)Nc1cccc1C(=O)Nc1ccc(cc1)CCN1CCc2cc(c(cc2C1)OC)OC |
| C6086 | PI | Inhibitor | 174 | COe1cc2c(cc1OC)CN(CC2)CCNC(=O)c1cccc1NC(=O)c1ccc2cccc2e1               |
| C6087 | PI | Inhibitor | 174 | COe1cc2c(cc1OC)CN(CC2)Cc1ccc(cc1)NC(=O)c1cccc1NC(=O)c1cc2cccc2nc1      |
| C6088 | PI | Inhibitor | 174 | COe1cc2c(cc1OC)CN(CC2)CCc1ccc(cc1)NC(=O)c1cccc1NC(=O)c1ccc2c(nc1)CCCC2 |
| C6089 | PI | Inhibitor | 174 | CN(CCc1ccc(cc1)NC(=O)c1cccc1NC(=O)c1cnc2cccc2n1)Cc1ccc(c(e1)OC)OC      |
| C6090 | PI | Inhibitor | 174 | COe1cc2c(cc1OC)CN(CC2)CCNC(=O)c1cccc1NC(=O)c1ccc(cc1)C1CCCCC1          |
| C6091 | PI | Inhibitor | 174 | CN(CCc1ccc(cc1)NC(=O)c1cccc1NC(=O)c1cc2cccc2nc1)Cc1ccc(c(e1)F)F        |
| C6092 | PI | Inhibitor | 174 | CN(CCc1ccc(cc1)NC(=O)c1cccc1NC(=O)c1cc2cccc2nc1)Cc1ccc(c(e1)O)OC       |
| C6093 | PI | Inhibitor | 174 | CN(CCc1ccc(cc1)NC(=O)c1cccc1NC(=O)c1cc2cccc2nc1)Cc1ccc(c(e1)OC)O       |
| C6094 | PI | Inhibitor | 174 | Ce1cnc(en1)C(=O)Nc1cccc1C(=O)Nc1ccc(c1)CCN1CCc2cc(c(cc2C1)OC)OC        |
| C6095 | PI | Inhibitor | 174 | CC(C)c1ccc(cc1)C(=O)Nc1cccc1C(=O)NCCN1CCc2cc(c(cc2C1)OC)OC             |
| C6096 | PI | Inhibitor | 174 | CC(C)c1ccc(cc1)C(=O)Nc1ccc(cc1)C(=O)NCCN1CCc2cc(c(cc2C1)OC)OC)Cl       |
| C6097 | PI | Inhibitor | 174 | CC(C)c1ccc(cc1)C(=O)Nc1ccc(cc1)C(=O)NCCN1CCc2cc(c(cc2C1)OC)OC)Cl       |
| C6098 | PI | Inhibitor | 174 | COe1cc2c(cc1OC)CN(CC2)CCNC(=O)c1cccc1NC(=O)c1ccc2cccc2n1               |
| C6099 | PI | Inhibitor | 174 | COe1cc2c(cc1OC)CN(CC2)CCNC(=O)c1cccc1NC(=O)c1cc2cccc2en1               |
| C6100 | PI | Inhibitor | 174 | CCCc1ccc(cc1)C(=O)Nc1cccc1C(=O)NCCN1CCc2cc(c(cc2C1)OC)OC               |
| C6101 | PI | Inhibitor | 174 | COe1cc2c(cc1OC)CN(CC2)CCNC(=O)c1cccc1NC(=O)c1ccc(cc1)Br                |
| C6102 | PI | Inhibitor | 174 | COe1cc2c(cc1OC)CN(CC2)CCNC(=O)c1cccc1NC(=O)c1ccc(cc1)Ce1cccc1          |
| C6103 | PI | Inhibitor | 174 | COe1cc2c(cc1OC)CN(CC2)CCc1ccc(cc1)NC(=O)c1cccc1NC(=O)c1cccn1           |
| C6104 | PI | Inhibitor | 174 | COe1cc2c(cc1OC)CN(CC2)CCc1ccc(cc1)NC(=O)c1cccc1NC(=O)c1cccn1           |
| C6105 | PI | Inhibitor | 174 | COe1cc2c(cc1OC)CN(CC2)CCc1ccc(cc1)NC(=O)c1cccc1NC(=O)c1cncn1           |
| C6106 | PI | Inhibitor | 174 | COe1ccc(c1)C(=O)Nc1cccc1C(=O)Nc1ccc(cc1)CCN1CCc2cc(c(cc2C1)OC)OC       |
| C6107 | PI | Inhibitor | 174 | COe1ccc(cc1OC)CN1CCc2ccc(cc2C1)NC(=O)c1cccc1NC(=O)c1cnc2cccc2n1        |
| C6108 | PI | Inhibitor | 174 | CN(CCc1ccc(cc1)NC(=O)c1cccc1NC(=O)c1cc2cccc2nc1)CCc1ccc(c(e1)OC)OC     |
| C6109 | PI | Inhibitor | 174 | Ce1nc(es1)C(=O)Nc1cccc1C(=O)Nc1ccc(cc1)CCN1CCc2cc(c(cc2C1)OC)OC        |
| C6110 | PI | Inhibitor | 174 | c1ccc(cc1)CCNc1c2c(c(e3n2CCCC3)C#N)ncn1                                |
| C6111 | PI | Inhibitor | 174 | c1ccc(cc1)CS(=O)(=O)Nc1c2c(c(e3n2CCCC3)C#N)ncn1                        |
| C6112 | PI | Inhibitor | 174 | c1ccc2e(c1)c(c[nH]2)CCN1CCN(CC1)c1c2c(c(e3n2CCCC3)C#N)ncn1             |
| C6113 | PI | Inhibitor | 174 | c1ccc(cc1)CCN1CCN(CC1)c1c2c(c(e3n2CCCC3)C#N)ncn1                       |
| C6114 | PI | Inhibitor | 174 | c1ccc(cc1)CCCN1CCN(CC1)c1c2c(c(e3n2CCCC3)C#N)ncn1                      |
| C6115 | PI | Inhibitor | 174 | c1ccc(cc1)CS(=O)(=O)N1CCN(CC1)c1c2c(c(e3n2CCCC3)C#N)ncn1               |
| C6116 | PI | Inhibitor | 174 | c1ccc(cc1)C(=O)CN1CCN(CC1)c1c2c(c(e3n2CCCC3)C#N)ncn1                   |

|       |    |              |     |                                                                                                                  |
|-------|----|--------------|-----|------------------------------------------------------------------------------------------------------------------|
| C6117 | PI | Inhibitor    | 174 | c1ccc(c(c1)CCN1CCN(CC1)c1e2c(c(c3n2CCCC3)C#N)ncn1)C1                                                             |
| C6118 | PI | Inhibitor    | 174 | c1cc(cc(c1)C1)CCN1CCN(CC1)c1e2c(c(c3n2CCCC3)C#N)ncn1                                                             |
| C6119 | PI | Noninhibitor | 174 | OCC(=O)[C@]1(O)CC(O)[C@H]2C[C@@H](N)[C@H](O)[C@@H](C)O2)c2c(O)c3c(C(=O)c4cccc(OC)c4C3=O)c(O)c2C1                 |
| C6120 | PI | Inhibitor    | 174 | c1cc(ccc1CCN1CCN(CC1)c1e2c(c(c3n2CCCC3)C#N)ncn1)C1                                                               |
| C6121 | PI | Inhibitor    | 174 | c1cc(cc(c1)[N+](=O)[O-])CCN1CCN(CC1)c1e2c(c(c3n2CCCC3)C#N)ncn1                                                   |
| C6122 | PI | Inhibitor    | 174 | c1cc(ccc1CCN1CCN(CC1)c1e2c(c(c3n2CCCC3)C#N)ncn1)[N+](=O)[O-]                                                     |
| C6123 | PI | Inhibitor    | 174 | COe1cccc(c1)CCN1CCN(CC1)c1e2c(c(c3n2CCCC3)C#N)ncn1                                                               |
| C6124 | PI | Inhibitor    | 174 | c1cc(c(cc1CCN1CCN(CC1)c1e2c(c(c3n2CCCC3)C#N)ncn1)F)F                                                             |
| C6125 | PI | Inhibitor    | 174 | c1ccc(cc1)CCN1CCN(CC1)c1e2c(c(c3n2CCCC3)C#N)nc(n1)I                                                              |
| C6126 | PI | Inhibitor    | 174 | c1ccc(cc1)CCN1CCN(CC1)c1e2c(c(c3n2CCCC3)C#N)nc(n1)c1cccc1                                                        |
| C6127 | PI | Inhibitor    | 174 | CC(=O)Nc1ccc(cc1)c1nc2c(c3n2c(c2c(n1)N1CCN(CC1)CCc1cccc1)CCCC3)C#N                                               |
| C6128 | PI | Inhibitor    | 174 | c1cc(c(cc1CCN1CCN(CC1)c1e2c(c(c3n2CCCC3)C#N)nc(n1)c1cenc1)F)F                                                    |
| C6129 | PI | Inhibitor    | 174 | Cc1cccc1c1nc2c(c3n2c(c2c(n1)N1CCN(CC1)CCc1ccc(c(c1)F)F)CCCC3)C#N                                                 |
| C6130 | PI | Noninhibitor | 174 | [nH]1cc(CCS(=O)(=O)c2cccc2)c2cc(C[C@@H]3CCCN3C)ccc12                                                             |
| C6131 | PI | Inhibitor    | 174 | c1ccc(cc1)CCN1CCN(CC1)c1e2c(c(c3n2CCCC3)C(=O)c2cccc2)ncn1                                                        |
| C6132 | PI | Inhibitor    | 174 | COC(=O)c1c2n(c3c1ncnc3N1CCN(CC1)CCc1cccc1)CCCC2                                                                  |
| C6133 | PI | Inhibitor    | 174 | Cc1c(sc(n1)c1c2n(c3c1ncnc3N1CCN(CC1)CCc1cccc1)CCCC2)C                                                            |
| C6134 | PI | Inhibitor    | 174 | Cc1nc(no1)c1c2n(c3c1ncnc3N1CCN(CC1)CCc1cccc1)CCCC2                                                               |
| C6135 | PI | Inhibitor    | 174 | CCNC(=O)c1c2n(c3c1ncnc3N1CCN(CC1)CCc1ccc(c(c1)F)F)CCCC2                                                          |
| C6136 | PI | Inhibitor    | 174 | COe1cccc(c1OC)CNC(=O)c1c2n(c3c1ncnc3N1CCN(CC1)CCc1ccc(c(c1)F)F)CCCC2                                             |
| C6137 | PI | Inhibitor    | 174 | c1cenc(c1)CNC(=O)c1c2n(c3c1ncnc3N1CCN(CC1)CCc1ccc(c(c1)F)F)CCCC2                                                 |
| C6138 | PI | Inhibitor    | 174 | c1cc(cnc1)NC(=O)c1c2n(c3c1ncnc3N1CCN(CC1)CCc1ccc(c(c1)F)F)CCCC2                                                  |
| C6139 | PI | Noninhibitor | 174 | O[C@@H]1C(O)[C@@H]2[C@H]3COC(=O)[C@@H]3[C@@H](c3cc(OC)c(O)c(OC)c3)c3cc4c(OCO4)cc23)O[C@@H]2CO[C@@H](C)O[C@H]2C1O |
| C6140 | PI | Inhibitor    | 174 | CO[C@@H](CCc1cccc1)c1cccc1OC[C@H](CN1CCN(CC1)c1ccc(cc1)F)O                                                       |
| C6141 | PI | Inhibitor    | 174 | CC(C)N(C[C@H](COc1cccc1C(=O)CCc1cccc2c1cccc2)O)C(C)C                                                             |
| C6142 | PI | Inhibitor    | 174 | c1ccc(cc1)CCC(=O)c1ccc(cc1)OC[C@H](CN1CCCCC1)O                                                                   |
| C6143 | PI | Inhibitor    | 174 | c1ccc(cc1)CCC(=O)c1ccc(cc1)OC[C@H](CN1CCOCC1)O                                                                   |
| C6144 | PI | Inhibitor    | 174 | c1ccc(cc1)CCC(=O)c1cc(ccc1OC[C@H](CN1CCCCC1)O)OCc1cccc1                                                          |
| C6145 | PI | Noninhibitor | 174 | [nH]1c2cc(ccc2nc1c1ccc2[nH]c(nc2c1)c1ccc(OCC)cc1)N1CCN(C)CC1                                                     |
| C6146 | PI | Inhibitor    | 174 | c1ccc(cc1)CCC(=O)c1cc(ccc1OC[C@@H](CN1CCN(CC1)Cc1cccc1)O)OCc1cccc1                                               |
| C6147 | PI | Inhibitor    | 174 | CC(=O)c1ccc(cc1)OC[C@H](CN1CCN(CC1)c1ccc(cc1)F)O                                                                 |
| C6148 | PI | Noninhibitor | 174 | CC(=O)c1ccc(cc1)OC[C@H](CN1CCOCC1)O                                                                              |
| C6149 | PI | Inhibitor    | 174 | c1ccc(cc1)CCC(=O)c1cccc1OC[C@@H](CN1CCN(CC1)Cc1cccc1)O                                                           |
| C6150 | PI | Inhibitor    | 174 | c1ccc(cc1)CCC(=O)c1cccc1OC[C@H](CNCCC(c1cccc1)c1cccc1)O                                                          |
| C6151 | PI | Inhibitor    | 174 | CCN(CC)C[C@H](COc1cccc1C(=O)CCc1cccc1)O                                                                          |
| C6152 | PI | Inhibitor    | 174 | c1ccc(cc1)CCC(=O)c1cccc1OC[C@@H](CN1CCCCC1)O                                                                     |
| C6153 | PI | Inhibitor    | 174 | COe1cccc1N1CCN(CC1)C[C@@H](COc1cccc1C(=O)CCc1cccc1)O                                                             |
| C6154 | PI | Inhibitor    | 174 | c1ccc(cc1)CCC(=O)c1cccc1OC[C@@H](CNCC(c1cccc1)c1cccc1)O                                                          |
| C6155 | PI | Inhibitor    | 174 | Cc1c(c(=O)n(n1C[C@@H](CN(C(C)C)C(C)C)O)c1cccc1)C(=O)c1cccc1                                                      |
| C6156 | PI | Inhibitor    | 174 | Cc1cccc1N1CCN(CC1)C[C@@H](Cn1c(C)c(c(=O)n1c1cccc1)C(=O)c1cccc1)O                                                 |
| C6157 | PI | Noninhibitor | 174 | CCCNC[C@H](Cn1c(c(c(=O)n1c1cccc1)C(=O)c1ccs1)C)O                                                                 |
| C6158 | PI | Noninhibitor | 174 | Cc1c(c(=O)n(n1C[C@H](CNC(C)C)O)c1cccc1)C(=O)c1ccs1                                                               |
| C6159 | PI | Inhibitor    | 174 | CCCNC[C@@H](Cn1c(c(c(=O)n1c1cccc1)C(=O)CCc1cccc1)C)O                                                             |
| C6160 | PI | Inhibitor    | 174 | Cc1c(c(=O)n(n1C[C@@H](CNC(C)C)O)c1cccc1)C(=O)CCc1cccc1                                                           |
| C6161 | PI | Inhibitor    | 174 | CCCCNC[C@H](Cn1c(c(c(=O)n1c1cccc1)C(=O)CCc1cccc1)C)O                                                             |
| C6162 | PI | Inhibitor    | 174 | Cc1c(c(=O)n(n1C[C@H](CNC(C)C)O)c1cccc1)C(=O)CCc1cccc1                                                            |

|       |    |              |     |                                                                                                                                                                        |
|-------|----|--------------|-----|------------------------------------------------------------------------------------------------------------------------------------------------------------------------|
| C6163 | PI | Inhibitor    | 174 | <chem>OC[C@]1(O)O[C@H]([C@H]2C[C@H](C)[C@H](O2)[C@]2(CC)CC[C@@H](O2)[C@]2(C)CC[C@@]3(C)[C@@H](O)[C@@H](C)C(O3)[C@H](C)[C@@H](OC)[C@@H](C)C(=O)O)2)C(C)C[C@@H]1C</chem> |
| C6164 | PI | Inhibitor    | 174 | <chem>Cc1ccccc1N1CCN(CC1)C[C@@H](Cn1c(c(=O)n1c1ccccc1)C(=O)CCc1ccccc1)C)O</chem>                                                                                       |
| C6165 | PI | Inhibitor    | 174 | <chem>Cc1c(c(n1)C)OC[C@H](CN(C(C)C)C(C)C)O)C(=O)c1ccccc1</chem>                                                                                                        |
| C6166 | PI | Inhibitor    | 174 | <chem>Cc1c(c(n1)c1ccccc1)OC[C@H](CN(C(C)C)C(C)C)O)C(=O)c1ccccc1</chem>                                                                                                 |
| C6167 | PI | Noninhibitor | 174 | <chem>CC1([C@@H](C(c2cc(ccc2O1)C#N)NC)O)C</chem>                                                                                                                       |
| C6168 | PI | Inhibitor    | 174 | <chem>CC1([C@@H](C(c2cc(ccc2O1)C#N)N(Cc1ccccc1)CC(=O)OC(C)(C)C)O)C</chem>                                                                                              |
| C6169 | PI | Inhibitor    | 174 | <chem>CCN(CC)CCC[C@H](C)N[C@H]1c2ccccc2N([C@H]([C@@H]1O)C)C(=O)c1ccc(cc1)C</chem>                                                                                      |
| C6170 | PI | Inhibitor    | 174 | <chem>CCN(CC)CCC[C@H](C)N[C@H]1c2ccccc2N[C@H]([C@@H]1OC(=O)c1ccc(cc1)C)C</chem>                                                                                        |



Table S1. Reference of collected molecules

| Reference | Title                                                                                                                                           | Journal reference                                                                                         | Authors                                                                                                                                                                      |
|-----------|-------------------------------------------------------------------------------------------------------------------------------------------------|-----------------------------------------------------------------------------------------------------------|------------------------------------------------------------------------------------------------------------------------------------------------------------------------------|
| 1         | The effect of multiple N-methylation on intestinal permeability of cyclic hexapeptides                                                          | Molecular pharmaceutics, 2011; 8 (2); 479-87                                                              | Ovadia, O; Greenberg, S; Chatterjee, J; Laufer, B; Opperer, F; Kessler, H; Gilon, C; Hoffman, A;                                                                             |
| 2         | A General Model for Prediction of Caco-2 Cell Permeability                                                                                      | QSAR and Combinatorial Science, 2004; 23 (5); 303 - 310                                                   | Nordqvist, A.; Nilsson, J.; Lindmark, T.; Eriksson, A.; Garberg, P.; Kihlén, M.;                                                                                             |
| 3         | Epithelial transport of drugs in cell culture. I: A model for studying the passive diffusion of drugs over intestinal absorptive (Caco-2) cells | Journal of pharmaceutical sciences, 1990; 79 (6); 476-82                                                  | Artursson, P;                                                                                                                                                                |
| 4         | MDCK (Madin-Darby canine kidney) cells: A tool for membrane permeability screening.                                                             | Journal of pharmaceutical sciences, 1999; 88 (1); 28-33                                                   | Irvine, JD; Takahashi, L; Lockhart, K; Cheong, J; Tolan, JW; Selick, HE; Grove, JR;                                                                                          |
| 5         | Experimental and computational screening models for the prediction of intestinal drug absorption.                                               | Journal of Medicinal Chemistry, 2001; 44 (12); 1927-37                                                    | Stenberg, P; Norinder, U; Luthman, K; Artursson, P;                                                                                                                          |
| 6         | In vitro models for the blood-brain barrier.                                                                                                    | Toxicology in vitro : an international journal published in association with BIBRA, 2005; 19 (3); 299-334 | Garberg, P; Ball, M; Borg, N; Cecchelli, R; Fenart, L; Hurst, RD; Lindmark, T; Mabondzo, A; Nilsson, JE; Raub, TJ; Stanimirovic, D; Terasaki, T; Oberg, JO; Osterberg, T;    |
| 7         | In vitro intestinal permeability of factor Xa inhibitors: influence of chemical structure on passive transport and susceptibility to efflux.    | Pharmaceutical research, 2001; 18 (12); 1735-41                                                           | Schipper, NG; Osterberg, T; Wrangle, U; Westberg, C; Sokolowski, A; Rai, R; Young, W; Sjöström, B;                                                                           |
| 8         | In vitro permeability across Caco-2 cells (colonic) can predict in vivo (small intestinal) absorption in man--fact or myth.                     | Pharmaceutical research, 1997; 14 (6); 763-6                                                              | Yee, S;                                                                                                                                                                      |
| 9         | Synthesis, characterization and evaluation of pro-drugs of VLA-4 antagonists.                                                                   | Bioorganic & medicinal chemistry letters, 2004; 14 (7); 1651-4                                            | Huryn, DM; Ashwell, S; Baudy, R; Dressen, DB; Gallaway, W; Grant, FS; Konradi, A; Ley, RW; Petusky, S; Pleiss, MA; Sarantakis, D; Semko, CM; Sherman, MM; Tio, C;            |
| 10        | ADME evaluation in drug discovery. 5. Correlation of Caco-2 permeation with simple molecular properties.                                        | Journal of chemical information and computer sciences, 2004; 44 (5); 1585-600                             | Hou, TJ; Zhang, W; Xia, K; Qiao, XB; Xu, XJ;                                                                                                                                 |
| 11        | Correlating partitioning and caco-2 cell permeability of structurally diverse small molecular weight compounds.                                 | Pharmaceutical research, 1998; 15 (9); 1490-4                                                             | Yazdanian, M; Glynn, SL; Wright, JL; Hawi, A;                                                                                                                                |
| 12        | In Silico Prediction of Caco-2 Cell Permeability by a Classification QSAR Approach                                                              | Molecular Informatics, 2011; 30 (4); 376 - 385                                                            | Pham The, H.; González-Álvarez, I.; Bermejo, M.; Mangas Sanjuan, V.; Centelles, I.; Garrigues, T.; Cabrera-Pé rez, M. Hai Pham-The, Isabel Gonz lez- lvarez, Marival Bermejo |
| 13        | The Use of Rule-Based and QSPR Approaches in ADME Profiling: A Case Study on Caco-2 Permeability                                                | Mol. Inf. 2013, 32, 459-479                                                                               |                                                                                                                                                                              |
| 14        | PK/DB (a freely available database for pharmacokinetic properties)                                                                              | PK/DB (a freely available database for pharmacokinetic properties), 2011; ();                             | <a href="http://miro.ifsc.usp.br/pkdb/resume.php?mid=Nzc5">http://miro.ifsc.usp.br/pkdb/resume.php?mid=Nzc5</a>                                                              |
| 15        | Rate-limited steps of human oral absorption and QSAR studies.                                                                                   | Pharmaceutical research, 2002; 19 (10); 1446-57                                                           | Zhao, YH; Abraham, MH; Le, J; Hersey, A; Luscombe, CN; Beck, G; Sherborne, B; Cooper, I;                                                                                     |
| 16        | Prediction of human intestinal absorption of drug compounds from molecular structure.                                                           | Journal of chemical information and computer sciences, 1998; 38 (4); 726-35                               | Wessel, MD; Jurs, PC; Tolan, JW; Muskal, SM;                                                                                                                                 |
| 17        | Drug liposome partitioning as a tool for the prediction of human passive intestinal absorption.                                                 | Pharmaceutical research, 1999; 16 (6); 882-8                                                              | Balon, K; Riebesehl, BU; Müller, BW;                                                                                                                                         |

|    |                                                                                                                                                                     |                                                                                                                                               |                                                                                                                                 |
|----|---------------------------------------------------------------------------------------------------------------------------------------------------------------------|-----------------------------------------------------------------------------------------------------------------------------------------------|---------------------------------------------------------------------------------------------------------------------------------|
| 18 | Functional role of P-glycoprotein in limiting intestinal absorption of drugs: contribution of passive permeability to P-glycoprotein mediated efflux transport.     | Molecular pharmaceutics, 2005; 2 (1); 12-21                                                                                                   | Varma, MV; Sateesh, K; Panchagnula, R;                                                                                          |
| 19 | Toward minimalistic modeling of oral drug absorption. ADME evaluation. 2. A computer model for the prediction of intestinal absorption in humans.                   | Journal of molecular graphics & modelling, 1999; 17 (5-6); 261-74, 329                                                                        | Oprea, TI; Gottfries, J;                                                                                                        |
| 20 | Physicochemical high throughput screening: parallel artificial membrane permeation assay in the description of passive absorption processes.                        | European journal of pharmaceutical sciences : official journal of the European Federation for Pharmaceutical Sciences, 2002; 17 (4-5); 253-63 | Klopman, G; Stefan, LR; Saiakhov, RD;                                                                                           |
| 21 | In silico ADME modeling 3: Computational models to predict human intestinal absorption using sphere exclusion and kNN QSAR methods                                  | Journal of Medicinal Chemistry, 1998; 41 (7); 1007-10                                                                                         | Kansy, M; Senner, F; Gubernator, K; Kansy, M;                                                                                   |
| 22 | Molecular hashkeys: a novel method for molecular characterization and its application for predicting important pharmaceutical properties of molecules.              | QSAR and Combinatorial Science, 2007; 26 (5); 653-668                                                                                         | Gunturi, S.; Narayanan, R.;                                                                                                     |
| 23 | ADME evaluation in drug discovery. 7. Prediction of oral absorption by correlation and classification                                                               | Journal of Medicinal Chemistry, 1999; 42 (10); 1739-48                                                                                        | Ghuloum, AM; Sage, CR; Jain, AN;                                                                                                |
| 24 | Molecular properties that influence the oral bioavailability of drug candidates                                                                                     | Journal of Chemical Information and Modeling, 2007, 47, 208-218                                                                               | Tingjun Hou, Junmei Wang, Wei Zhang, Xiaojie Xu                                                                                 |
| 25 | Critical Evaluation of Human Oral Bioavailability for Pharmaceutical Drugs by Using Various Cheminformatics Approaches                                              | Journal of Medicinal Chemistry, 2002; 45(12); 2615-23                                                                                         | Veber,DF;Johnson,SR;Cheng,HY;Smith,BR;Ward,KW;Kople,KD;Cheng,HY;                                                                |
| 26 | ADME Evaluation in Drug Discovery. 9. Prediction of Oral Bioavailability in Humans Based on Molecular Properties and Structural Fingerprints                        | Pharm Res (2014) 31:1002–1014                                                                                                                 | Marlene T. Kim & Alexander Sedykh & Suman K. Chakravarti & Roustem D. Saiakhov & Hao Zhu                                        |
| 27 | PK/DB (a freely available database for pharmacokinetic properties)                                                                                                  | Molecular Pharmaceutics, 2011, 8, 841-851                                                                                                     | Tian, S.;Li, Y. Y.;Wang, J. M.;Zhang, J.;Hou, T. J.                                                                             |
| 28 | Experimental and computational screening models for the prediction of intestinal drug absorption                                                                    | <a href="http://miro.ifsc.usp.br/pkdb/resume.php?mid=Nzc5">http://miro.ifsc.usp.br/pkdb/resume.php?mid=Nzc5</a>                               |                                                                                                                                 |
| 29 | CODES/neural network model: A useful tool for in silico prediction of oral absorption and blood-brain barrier permeability of structurally diverse drugs            | Journal of Medicinal Chemistry, 2001; 44 (12); 1927-37                                                                                        | Stenberg, P; Norinder, U; Luthman, K; Artursson, P                                                                              |
| 30 | MDCK (Madin-Darby canine kidney) cells: A tool for membrane permeability screening                                                                                  | QSAR and Combinatorial Science, 2004; 23 (); 89-98                                                                                            | Isabel, D.                                                                                                                      |
| 31 | Human Intestinal Transporter Database: QSAR Modeling and Virtual Profiling of Drug Uptake, Efflux and Interactions                                                  | Journal of pharmaceutical sciences, 1999; 88 (1); 28-33                                                                                       | Irvine, JD; Takahashi, L; Lockhart, K; Cheong, J; Tolan, JW; Selick, HE; Grove, JR                                              |
| 32 | HIV-1 protease inhibitors are substrates for the MDR1 multidrug transporter. Structure-activity relationship: analyses of p-glycoprotein substrates and inhibitors. | Pharm Res (2013) 30:996–1007                                                                                                                  | Sedykh, A.;Fourches, D.;Duan, J. M.;Hucke, O.;Garneau, M.;Zhu,H.;Bonneau,P.;Tropsha, A.                                         |
| 33 | Steady-state brain concentrations of antihistamines in rats: interplay of membrane permeability, P-glycoprotein efflux and plasma protein binding.                  | Biochemistry, 1998; 37 (11); 3594-601                                                                                                         | Lee, CG; Gottesman, MM; Cardarelli, CO; Ramachandra, M; Jeang, KT; Ambudkar, SV; Pastan, I; Dey, S;                             |
| 34 |                                                                                                                                                                     | Journal of clinical pharmacy and therapeutics, 2003; 28 (3); 203-28                                                                           | Wang, RB; Kuo, CL; Lien, LL; Lien, EJ;                                                                                          |
| 35 |                                                                                                                                                                     | Pharmacology, 2004; 72 (2); 92-8                                                                                                              | Mahar Doan, KM; Wring, SA; Shampine, LJ; Jordan, KH; Bishop, JP; Kratz, J; Yang, E; Serabjit-Singh, CJ; Adkison, KK; Polli, JW; |

36 Reversal of multidrug resistance of cancer through inhibition of P-glycoprotein by 5-bromotetrandrine. *Cancer chemotherapy and pharmacology*, 2005; 55 (2); 179-88

37 Rhodamine inhibitors of P-glycoprotein: an amide/thioamide "switch" for ATPase activity. *Journal of Medicinal Chemistry*, 2009; 52 (10); 3328-41

38 P-glycoprotein influences the brain concentrations of cetirizine (Zyrtec), a second-generation non-sedating antihistamine. *Journal of pharmaceutical sciences*, 2003; 92 (10); 2082-9

39 Drugs as P-glycoprotein substrates, inhibitors, and inducers. *Drug metabolism reviews*, 2002; 34 (1-2); 47-54

40 Involvement of intestinal P-glycoprotein in the restricted absorption of methylprednisolone from rat small intestine. *Journal of pharmaceutical sciences*, 1998; 87 (1); 73-5

41 Prediction of P-glycoprotein substrates by a support vector machine approach. *Journal of chemical information and computer sciences*, 2004; 44 (4); 1497-505

42 Drug transporters and their role in multidrug resistance of neoplastic cells. *General physiology and biophysics*, 2001; 20 (3); 215-37

43 Contribution of P-glycoprotein to efflux of ramosetron, a 5-HT<sub>3</sub> receptor antagonist, across the blood-brain barrier. *The Journal of pharmacy and pharmacology*, 2002; 54 (8); 1055-63

44 Interactions between the flavonoid biochanin A and P-glycoprotein substrates in rats: in vitro and in vivo. *Journal of pharmaceutical sciences*, 2010; 99 (1); 430-41

45 Characterisation of (R/S)-propafenone and its metabolites as substrates and inhibitors of P-glycoprotein. *Naunyn-Schmiedeberg's archives of pharmacology*, 2005; 371 (3); 195-201

46 Laulimalide and isolaulimalide, new paclitaxel-like microtubule-stabilizing agents. *Cancer research*, 1999; 59 (3); 653-60

47 In search of natural substrates and inhibitors of MDR pumps. *Journal of molecular microbiology and biotechnology*, 2001; 3 (2); 247-54

48 Kinetic analysis of calcein and calcein-acetoxymethylester efflux mediated by the multidrug resistance protein and P-glycoprotein. *Biochemistry*, 1998; 37 (8); 2243-50

49 A general pattern for substrate recognition by P-glycoprotein. *European journal of biochemistry / FEBS*, 1998; 251 (1-2); 252-61

50 Many P-glycoprotein substrates do not inhibit the transport process across cell membranes. *Xenobiotica; the fate of foreign compounds in biological systems*, 2003; 33 (2); 131-40

51 Potential role for P-glycoprotein in the non-proportional pharmacokinetics of UK-343,664 in man. *Xenobiotica; the fate of foreign compounds in biological systems*, 2001; 31 (8-9); 665-76

52 Role of drug efflux transporters in the brain for drug disposition and treatment of brain diseases. *Progress in neurobiology*, 2005; 76 (1); 22-76

53 A topological substructural approach for the prediction of P-glycoprotein substrates. *Journal of pharmaceutical sciences*, 2006; 95 (3); 589-606

54 Goodman & Gilman's The pharmacological basis of therapeutics 2006

55 Rhodamine efflux patterns predict P-glycoprotein substrates in the National Cancer Institute drug screen. *Molecular pharmacology*, 1994; 46 (4); 627-38

Jin, J; Wang, FP; Wei, H; Liu, G;  
Gannon, MK; Holt, JJ; Bennett, SM; Wetzel, BR; Loo, TW; Bartlett, MC; Clarke, DM; Sawada, GA; Higgins, JW; Tomblin, G; Raub, TJ; Detty, MR;  
Polli, JW; Baughman, TM; Humphreys, JE; Jordan, KH; Mote, AL; Salisbury, JA; Tippin, TK; Serabjit-Singh, CJ;  
Kim, RB;  
Saitoh, H; Hatakeyama, M; Eguchi, O; Oda, M; Takada, M;  
Xue, Y; Yap, CW; Sun, LZ; Cao, ZW; Wang, JF; Chen, YZ;  
Kvackajová-Kisucká, J; Barancik, M; Breier, A;  
Yamamoto, C; Murakami, H; Koyabu, N; Takanaga, H; Matsuo, H; Uchiumi, T; Kuwano, M; Naito, M; Tsuruo, T; Ohtani, H; Sawada, Y;  
Zhang, S; Sagawa, K; Arnold, RD; Tseng, E; Wang, X; Morris, ME;  
Bachmakov, I; Rekersbrink, S; Hofmann, U; Eichelbaum, M; Fromm, MF;  
Mooberry, SL; Tien, G; Hernandez, AH; Plubrukarn, A; Davidson, BS;  
Lewis, K;  
Essodaigui, M; Broxterman, HJ; Garnier-Suillerot, A;  
Seelig, A;  
Barecki-Roach, M; Wang, EJ; Johnson, WW;  
Abel, S; Beaumont, KC; Crespi, CL; Eve, MD; Fox, L; Hyland, R; Jones, BC; Muirhead, GJ; Smith, DA; Venn, RF; Walker, DK;  
Löscher, W; Potschka, H;  
Cabrera, MA; González, I; Fernández, C; Navarro, C; Bermejo, M;  
Laurence L. Brunton, editor-in-chief;  
Lee, JS; Paull, K; Alvarez, M; Hose, C; Monks, A; Grever, M; Fojo, AT; Bates, SE;

|    |                                                                                                                                                                                                            |                                                                                             |                                                                                                            |
|----|------------------------------------------------------------------------------------------------------------------------------------------------------------------------------------------------------------|---------------------------------------------------------------------------------------------|------------------------------------------------------------------------------------------------------------|
| 56 | Mappain, a new cytotoxic prenylated stilbene from <i>Macaranga mappa</i> .                                                                                                                                 | Journal of natural products, 2001; 64 (1); 103-5                                            | van Der Kaaden, JE; Hemscheidt, TK; Mooberry, SL;                                                          |
| 57 | Overlapping ligand specificity of P-glycoprotein and serum alpha(1)-acid glycoprotein: evidences and potential implications.                                                                               | Current drug metabolism, 2007; 8 (6); 563-93                                                | Zsila, F                                                                                                   |
| 58 | Characterization of P-glycoprotein mediated transport of K02, a novel vinylsulfone peptidomimetic cysteine protease inhibitor, across MDR1-MDCK and Caco-2 cell monolayers.                                | Pharmaceutical research, 1998; 15 (10); 1520-4                                              | Zhang, Y; Benet, LZ                                                                                        |
| 59 | Interaction of cytochrome P450 3A inhibitors with P-glycoprotein.                                                                                                                                          | The Journal of pharmacology and experimental therapeutics, 2002; 303 (1); 323-32            | Yasuda, K; Lan, LB; Sanglard, D; Furuya, K; Schuetz, JD; Schuetz, EG                                       |
| 60 | Polarized transport of docetaxel and vinblastine mediated by P-glycoprotein in human intestinal epithelial cell monolayers.                                                                                | Biochemical pharmacology, 1994; 48 (7); 1528-30                                             | Wils, P; Phung-Ba, V; Warnery, A; Lechardeur, D; Raecissi, S; Hidalgo, IJ; Scherman, D                     |
| 61 | Structure-activity relationships of multidrug resistance reversers.                                                                                                                                        | Current medicinal chemistry, 2001; 8 (6); 685-713                                           | Wiese, M; Pajeva, IK                                                                                       |
| 62 | P-glycoprotein interactions of nefazodone and trazodone in cell culture.                                                                                                                                   | Journal of clinical pharmacology, 2001; 41 (7); 708-14                                      | Störmer, E; von Moltke, LL; Perloff, MD; Greenblatt, DJ                                                    |
| 63 | P-glycoprotein substrates and antagonists cluster into two distinct groups.                                                                                                                                | Molecular pharmacology, 1997; 51 (6); 1024-33                                               | Scala, S; Akhmed, N; Rao, US; Paull, K; Lan, LB; Dickstein, B; Lee, JS; Elgemeie, GH; Stein, WD; Bates, SE |
| 64 | The novel N-substituted benzotropine analog GA2-50 possesses pharmacokinetic and pharmacodynamic profiles favorable for a candidate substitute medication for cocaine abuse                                | Journal of pharmaceutical sciences, 2008; 97 (12); 5453-70                                  | Othman, AA; Newman, AH; Eddington, ND                                                                      |
| 65 | P-glycoprotein deficiency in a subpopulation of CF-1 mice enhances avermectin-induced neurotoxicity                                                                                                        | Toxicology and applied pharmacology, 1997; 143 (2); 357-65                                  | Lankas, GR; Cartwright, ME; Umbenhauer, D                                                                  |
| 66 | Lipophilic cations: a group of model substrates for the multidrug-resistance transporter.                                                                                                                  | Biochemistry, 1992; 31 (7); 1992-8                                                          | Gros, P; Talbot, F; Tang-Wai, D; Bibi, E; Kaback, HR                                                       |
| 67 | Substrates, inhibitors and activators of P-glycoprotein: candidates for radiolabeling and imaging perspectives.                                                                                            | Current topics in medicinal chemistry, 2010; 10 (17); 1703-14                               | Colabufo, NA; Berardi, F; Perrone, MG; Capparelli, E; Cantore, M; Inglese, C; Perrone, R                   |
| 68 | Classification analysis of P-glycoprotein substrate specificity                                                                                                                                            | Journal of drug targeting, 2003; 11 (7); 391-406                                            | Didziapetris, R; Japertas, P; Avdeef, A; Petrauskas, A                                                     |
| 69 | Classification of substrates and inhibitors of P-glycoprotein using unsupervised machine learning approach.                                                                                                | Journal of chemical information and modeling, 2005; 45 (3); 750-7                           | Wang, YH; Li, Y; Yang, SL; Yang, L                                                                         |
| 70 | Cytotoxic effects of 27 anticancer drugs in HeLa and MDR1-overexpressing derivative cell lines.                                                                                                            | Biological & pharmaceutical bulletin, 2002; 25 (6); 771-8                                   | Takara, K; Sakaeda, T; Yagami, T; Kobayashi, H; Ohmoto, N; Horinouchi, M; Nishiguchi, K; Okumura, K        |
| 71 | Comparison of steroid substrates and inhibitors of P-glycoprotein by 3D-QSAR analysis                                                                                                                      | Journal of Molecular Structure, 2005; 733 (1-3); 111-118                                    | Li, Y.; Wang, Y.; Yang, L.; Zhang, S.; Liu, C.; Yang, S                                                    |
| 72 | Correlation between steady-state ATP hydrolysis and vanadate-induced ADP trapping in Human P-glycoprotein. Evidence for ADP release as the rate-limiting step in the catalytic cycle and its modulation by | The Journal of biological chemistry, 2001; 276 (12); 8657-64                                | Kerr, KM; Sauna, ZE; Ambudkar, SV                                                                          |
| 73 | Absorption of fumonisin B1 and aminopentol on an in vitro model of intestinal epithelium; the role of P-glycoprotein                                                                                       | Toxicon : official journal of the International Society on Toxicology, 2005; 45 (3); 285-91 | De Angelis, I; Friggè, G; Raimondi, F; Stammati, A; Zucco, F; Caloni, F                                    |

|    |                                                                                                                                                                                                                                 |                                                                                                                                           |                                                                                                                             |
|----|---------------------------------------------------------------------------------------------------------------------------------------------------------------------------------------------------------------------------------|-------------------------------------------------------------------------------------------------------------------------------------------|-----------------------------------------------------------------------------------------------------------------------------|
| 74 | Strategies for overcoming ABC-transporters-mediated multidrug resistance (MDR) of tumor cells.<br>Cellular uptake, cytotoxicity, and transport kinetics of anthracyclines in human sensitive and multidrug-resistant K562 cells | Acta biochimica Polonica, 2005; 52 (3); 609-27                                                                                            | Borowski, E; Bontemps-Gracz, MM; Piwkowska, A                                                                               |
| 75 | Fumonisin toxicity in a transgenic mouse model lacking the mdr1a/1b P-glycoprotein genes                                                                                                                                        | Biochemical pharmacology, 1996; 51 (10); 1341-8                                                                                           | Praet, M; Stryckmans, P; Ruyschaert, JM                                                                                     |
| 76 | P-glycoprotein-mediated efflux of antiepileptic drugs: preliminary studies in mdr1a knockout mice                                                                                                                               | Environmental toxicology and pharmacology, 2000; 8 (3); 173-182                                                                           | Sharma, RP; Bhandari, N; Tsunoda, M; Riley, RT; Voss, KA; Meredith, FI                                                      |
| 77 | Establishment of a P-glycoprotein substrate screening model and its preliminary application                                                                                                                                     | Epilepsy & behavior : E&B, 2002; 3 (5); 427-432                                                                                           | Sills, GJ; Kwan, P; Butler, E; de Lange, EC; van den Berg, DJ; Brodie, MJ                                                   |
| 78 | Mibefradil is a P-glycoprotein substrate and a potent inhibitor of both P-glycoprotein and CYP3A in vitro                                                                                                                       | World journal of gastroenterology : WJG, 2004; 10 (9); 1365-8                                                                             | Wang, Y; Cao, J; Zeng, S                                                                                                    |
| 79 | Gomisin A alters substrate interaction and reverses P-glycoprotein-mediated multidrug resistance in HepG2-DR cells                                                                                                              | Drug metabolism and disposition: the biological fate of chemicals, 2000; 28 (8); 895-8                                                    | Wandel, C; Kim, RB; Guengerich, FP; Wood, AJ                                                                                |
| 80 | Antibiotic efflux pumps in eukaryotic cells: occurrence and impact on antibiotic cellular pharmacokinetics, pharmacodynamics and toxicodynamics                                                                                 | Biochemical pharmacology, 2006; 72 (7); 824-37                                                                                            | Wan, CK; Zhu, GY; Shen, XL; Chattopadhyay, A; Dey, S; Fong, WF                                                              |
| 81 | Active efflux of the 5-HT(1A) receptor agonist flesinoxan via P-glycoprotein at the blood-brain barrier                                                                                                                         | The Journal of antimicrobial chemotherapy, 2003; 51 (5); 1067-77                                                                          | Van Bambeke, F; Michot, JM; Tulkens, PM                                                                                     |
| 82 | Blood-brain barrier transport of H1-antagonist ebastine and its metabolite carebastine                                                                                                                                          | European journal of pharmaceutical sciences : official journal of the European Federation for Pharmaceutical Sciences, 2001; 14 (1); 81-6 | van der Sandt, IC; Smolders, R; Nabulsi, L; Zuideveld, KP; de Boer, AG; Breimer, DD                                         |
| 83 | P-glycoprotein-mediated transport of berberine across Caco-2 cell monolayers                                                                                                                                                    | Journal of drug targeting, 2000; 8 (6); 383-93                                                                                            | Tamai, I; Kido, Y; Yamashita, J; Sai, Y; Tsuji, A                                                                           |
| 84 | Drug-drug interaction mediated by inhibition and induction of P-glycoprotein                                                                                                                                                    | Journal of pharmaceutical sciences, 2002; 91 (12); 2614-21                                                                                | Maeng, HJ; Yoo, HJ; Kim, IW; Song, IS; Chung, SJ; Shim, CK                                                                  |
| 85 | Recent advances in molecular modeling and medicinal chemistry aspects of phospho-glycoprotein                                                                                                                                   | Advanced drug delivery reviews, 2003; 55 (1); 53-81                                                                                       | Lin, JH                                                                                                                     |
| 86 | P-glycoprotein-mediated transport of digitoxin, alpha-methylidigoxin and beta-acetyldigoxin                                                                                                                                     | Current drug metabolism, 2006; 7 (2); 205-17                                                                                              | Srinivas, E; Murthy, JN; Rao, AR; Sastry, GN                                                                                |
| 87 | Uptake and efflux of the peptidic delta-opioid receptor agonist                                                                                                                                                                 | Naunyn-Schmiedeberg's archives of pharmacology, 2001; 363 (3); 337-43                                                                     | Pauli-Magnus, C; Mürdter, T; Godel, A; Mettang, T; Eichelbaum, M; Klotz, U; Fromm, MF                                       |
| 88 | Mammalian drug efflux transporters of the ATP binding cassette (ABC) family: an overview                                                                                                                                        | Neuroscience letters, 2001; 301 (3); 155-8                                                                                                | Dagenais, C; Ducharme, J; Pollack, GM                                                                                       |
| 89 | P-Glycoprotein-mediated efflux of phenobarbital, lamotrigine, and felbamate at the blood-brain barrier: evidence from microdialysis experiments in rats                                                                         | Advanced drug delivery reviews, 2003; 55 (1); 3-29                                                                                        | Schinkel, AH; Jonker, JW                                                                                                    |
| 90 | The role of efflux and uptake transporters in [N-(3-chloro-4-(3-fluorobenzyl)oxy)phenyl]-6-[5-(2-(methylsulfonyl)ethyl)amino]methyl]-2-furyl]-4-quinazolinamine (GW572016, lapatinib) disposition and drug interactions         | Neuroscience letters, 2002; 327 (3); 173-6                                                                                                | Potschka, H; Fedrowitz, M; Löscher, W                                                                                       |
| 91 | Carbamazepine is not a substrate for P-glycoprotein                                                                                                                                                                             | Drug metabolism and disposition: the biological fate of chemicals, 2008; 36 (4); 695-701                                                  | Polli, JW; Humphreys, JE; Harmon, KA; Castellino, S; O'Mara, MJ; Olson, KL; John-Williams, LS; Koch, KM; Serabjit-Singh, CJ |
| 92 |                                                                                                                                                                                                                                 | British journal of clinical pharmacology, 2001; 51 (4); 345-9                                                                             | Owen, A; Pirmohamed, M; Tettey, JN; Morgan, P; Chadwick, D; Park, BK                                                        |

|     |                                                                                                                                                                             |                                                                                                                                             |                                                                                                                                                   |
|-----|-----------------------------------------------------------------------------------------------------------------------------------------------------------------------------|---------------------------------------------------------------------------------------------------------------------------------------------|---------------------------------------------------------------------------------------------------------------------------------------------------|
| 93  | Opioids and efflux transporters. Part 1: P-glycoprotein substrate activity of N-substituted analogs of meperidine                                                           | Bioorganic & medicinal chemistry letters, 2007; 17 (5); 1160-2                                                                              | Mercer, SL; Hassan, HE; Cunningham, CW; Eddington, ND; Coop, A                                                                                    |
| 94  | Quantification and characterization of P-glycoprotein-substrate interactions                                                                                                | Biochemistry, 2006; 45 (9); 3020-32                                                                                                         | Gatlik-Landwojtowicz, E; Aänismaa, P; Seelig, A                                                                                                   |
| 95  | Several major antiepileptic drugs are substrates for human P-glycoprotein                                                                                                   | Neuropharmacology, 2008; 55 (8); 1364-75                                                                                                    | Luna-Tortós, C; Fedrowitz, M; Löscher, W                                                                                                          |
| 96  | Significance analysis and multiple pharmacophore models for differentiating P-glycoprotein substrates                                                                       | Journal of chemical information and modeling, 2007; 47 (6); 2429-38                                                                         | Li, WX; Li, L; Eksterowicz, J; Ling, XB; Cardozo, M                                                                                               |
| 97  | Altered drug disposition of the platelet activating factor antagonist apafant in mdr1a knockout mice                                                                        | European journal of pharmaceutical sciences : official journal of the European Federation for Pharmaceutical Sciences, 2002; 16 (3); 119-28 | Leusch, A; Volz, A; Müller, G; Wagner, A; Sauer, A; Greischel, A; Roth, W                                                                         |
| 98  | Predicting P-glycoprotein substrates by a quantitative structure-activity relationship model                                                                                | Journal of pharmaceutical sciences, 2004; 93 (4); 957-68                                                                                    | Gombar, VK; Polli, JW; Humphreys, JE; Wring, SA; Serabjit-Singh, CS                                                                               |
| 99  | Small P-gp modulating molecules: SAR studies on tetrahydroisoquinoline derivatives                                                                                          | Bioorganic & medicinal chemistry, 2008; 16 (1); 362-73                                                                                      | Colabufo, NA; Berardi, F; Cantore, M; Perrone, MG; Contino, M; Inglese, C; Niso, M; Perrone, R; Azzariti, A; Simone, GM; Porcelli, L; Paradiso, A |
| 100 | A pharmacophore hypothesis for P-glycoprotein substrate recognition using GRIND-based 3D-QSAR                                                                               | Journal of Medicinal Chemistry, 2005; 48 (8); 2927-35                                                                                       | Cianchetta, G; Singleton, RW; Zhang, M; Wildgoose, M; Giesing, D; Fravolini, A; Cruciani, G; Vaz, RJ                                              |
| 101 | Characterization of two pharmacophores on the multidrug transporter P-glycoprotein                                                                                          | Molecular pharmacology, 2002; 62 (6); 1288-98                                                                                               | Garrigues, A; Loiseau, N; Delaforge, M; Ferte, J; Garrigos, M; André, F; Orłowski, S                                                              |
| 102 | Rapid identification of P-glycoprotein substrates and inhibitors                                                                                                            | Drug metabolism and disposition: the biological fate of chemicals, 2006; 34 (12); 1976-84                                                   | Chang, C; Bahadduri, PM; Polli, JE; Swaan, PW; Ekins, S                                                                                           |
| 103 | Loperamide and P-glycoprotein inhibition: assessment of the clinical relevance                                                                                              | The Journal of pharmacy and pharmacology, 2010; 62 (4); 401-12                                                                              | Vandenbossche, J; Huisman, M; Xu, Y; Sanderson-Bongiovanni, D; Soons, P                                                                           |
| 104 | The antiepileptic drug topiramate is a substrate for human P-glycoprotein but not multidrug resistance                                                                      | Pharmaceutical research, 2009; 26 (11); 2464-70                                                                                             | Luna-Tortós, C; Rambeck, B; Jürgens, UH; Löscher, W                                                                                               |
| 105 | Overlapping substrate specificities of cytochrome P450 3A and P-glycoprotein for a novel cysteine protease                                                                  | Drug metabolism and disposition: the biological fate of chemicals, 1998; 26 (4); 360-6                                                      | Zhang, Y; Guo, X; Lin, ET; Benet, LZ                                                                                                              |
| 106 | Can the enhanced renal clearance of antibiotics in cystic fibrosis patients be explained by P-glycoprotein                                                                  | Pharmaceutical research, 2002; 19 (4); 457-62                                                                                               | Susanto, M; Benet, LZ                                                                                                                             |
| 107 | Active transport of the angiotensin-II antagonist losartan and its main metabolite EXP 3174 across MDCK-MDR1 and caco-2 cell monolayers                                     | British journal of pharmacology, 2000; 129 (6); 1235-43                                                                                     | Soldner, A; Benet, LZ; Mutschler, E; Christians, U                                                                                                |
| 108 | The role of transporters in the pharmacokinetics of orally administered drugs                                                                                               | Pharmaceutical research, 2009; 26 (9); 2039-54                                                                                              | Shugarts, S; Benet, LZ                                                                                                                            |
| 109 | P-glycoprotein-mediated transport of oxytetracycline in the Caco-2 cell model                                                                                               | Journal of veterinary pharmacology and therapeutics, 2007; 30 (1); 25-31                                                                    | Schricks, J; Fink-Gremmels, J                                                                                                                     |
| 110 | Up-regulation of CD147 and matrix metalloproteinase-2, -9 induced by P-glycoprotein substrates in multidrug resistant breast cancer cells                                   | Cancer science, 2007; 98 (11); 1767-74                                                                                                      | Li, QQ; Wang, WJ; Xu, JD; Cao, XX; Chen, Q; Yang, JM; Xu, ZD                                                                                      |
| 111 | Effect of the MDR1 C3435T variant and P-glycoprotein induction on dicloxacillin pharmacokinetics                                                                            | Journal of clinical pharmacology, 2005; 45 (4); 411-21                                                                                      | Putnam, WS; Woo, JM; Huang, Y; Benet, LZ                                                                                                          |
| 112 | Kinetic identification of membrane transporters that assist P-glycoprotein-mediated transport of digoxin and loperamide through a confluent monolayer of MDCKII-hMDR1 cells | Drug metabolism and disposition: the biological fate of chemicals, 2008; 36 (2); 452-60                                                     | Acharya, P; O'Connor, MP; Polli, JW; Ayrton, A; Ellens, H; Bentz, J                                                                               |

|     |                                                                                                                                                                           |                                                                                          |                                                                                                                                                          |
|-----|---------------------------------------------------------------------------------------------------------------------------------------------------------------------------|------------------------------------------------------------------------------------------|----------------------------------------------------------------------------------------------------------------------------------------------------------|
| 113 | Pre-clinical evidence of enhanced oral bioavailability of the P-glycoprotein substrate talinolol in combination with morin                                                | Biopharmaceutics & drug disposition, 2010; 31 (2-3); 202-14                              | Pathak, SM; Udupa, N                                                                                                                                     |
| 114 | Contribution of P-glycoprotein to bunitrolol efflux across blood-brain barrier                                                                                            | Biopharmaceutics & drug disposition, 1999; 20 (2); 85-90                                 | Matsuzaki, J; Yamamoto, C; Miyama, T; Takanaga, H; Matsuo, H; Ishizuka, H; Kawahara, Y; Kuwano, M; Naito, M; Tsuruo, T; Sawada, Y                        |
| 115 | Pharmacokinetics and interactions of a novel antagonist of chemokine receptor 5 (CCR5) with ritonavir in rats and monkeys: role of CYP3A and P-glycoprotein               | The Journal of pharmacology and experimental therapeutics, 2003; 304 (3); 1161-71        | Kumar, S; Kwei, GY; Poon, GK; Iliff, SA; Wang, Y; Chen, Q; Franklin, RB; Didolkar, V; Wang, RW; Yamazaki, M; Chiu, SH; Lin, JH; Pearson, PG; Baillie, TA |
| 116 | Transport of quinolone antibacterial drugs by human P-glycoprotein expressed in a kidney epithelial cell line, LLC-PK1                                                    | The Journal of pharmacology and experimental therapeutics, 1997; 282 (2); 955-60         | Ito, T; Yano, I; Tanaka, K; Inui, KI                                                                                                                     |
| 117 | Is Ciprofloxacin a Substrate of P-glycoprotein?                                                                                                                           | Archives of Drug Information, 2010                                                       | Park, M. S.; Okochi, H.; Benet, L. Z                                                                                                                     |
| 118 | The antiepileptic drug topiramate is a substrate for human P-glycoprotein but not multidrug resistance                                                                    | Pharmaceutical research, 2009; 26 (11); 2464-70                                          | Luna-Tortós, C; Rambeck, B; Jürgens, UH; Löscher, W                                                                                                      |
| 119 | Quinacrine is mainly metabolized to mono-desethyl quinacrine by CYP3A4/5 and its brain accumulation is limited by P-glycoprotein                                          | Drug metabolism and disposition: the biological fate of chemicals, 2006; 34 (7); 1136-44 | Huang, Y; Okochi, H; May, BC; Legname, G; Prusiner, SB; Benet, LZ; Guglielmo, BJ; Lin, ET                                                                |
| 120 | In vivo modulation of intestinal CYP3A metabolism by P-glycoprotein: studies using the rat single-pass intestinal perfusion model                                         | The Journal of pharmacology and experimental therapeutics, 2003; 305 (1); 306-14         | Cummins, CL; Salphati, L; Reid, MJ; Benet, LZ                                                                                                            |
| 121 | In vitro substrate identification studies for p-glycoprotein-mediated transport: species difference and predictability of in vivo results                                 | The Journal of pharmacology and experimental therapeutics, 2001; 296 (3); 723-35         | Yamazaki, M; Neway, WE; Ohe, T; Chen, I; Rowe, JF; Hochman, JH; Chiba, M; Lin, JH                                                                        |
| 122 | P-glycoprotein and breast cancer resistance protein influence brain distribution of dasatinib                                                                             | The Journal of pharmacology and experimental therapeutics, 2009; 330 (3); 956-63         | Chen, Y; Agarwal, S; Shaik, NM; Chen, C; Yang, Z; Elmquist, WF                                                                                           |
| 123 | Frog intestinal sac as an in vitro method for the assessment of intestinal permeability in humans: Application to carrier transported drugs18                             | International Journal of Pharmaceutics, 2008; 352 (1-2); 182-8                           | Franco, M; Lopodota, A; Trapani, A; Cutrignelli, A; Meleleo, D; Micelli, S; Trapani, G                                                                   |
| 124 | Danofloxacin-mesylate is a substrate for ATP-dependent efflux transporters                                                                                                | British journal of pharmacology, 2007; 150 (4); 463-9                                    | Schrickx, JA; Fink-Gremmels, J                                                                                                                           |
| 125 | Support Vector Machine Classifier for Predicting Drug Binding to P-glycoprotein                                                                                           | Journal of Proteomics & Bioinformatics, 2009; 2 (4); 193-201                             | Karthikeyan, R; Mohamed, S; Sridhar, V; Nagasuma, C                                                                                                      |
| 126 | Is MIBG a substrate of P-glycoprotein?                                                                                                                                    | European journal of nuclear medicine and molecular imaging, 2007; 34 (4); 448-52         | Kiyono, Y; Yamashita, T; Doi, H; Kuge, Y; Katsura, T; Inui, K; Saji, H                                                                                   |
| 127 | Cytotoxic activity of several unrelated drugs on L1210 mouse leukemic cell sublines with P-glycoprotein (PGP) mediated multidrug resistance (MDR) phenotype. A QSAR study | Neoplasma, 2000; 47 (2); 100-6                                                           | Breier, A; Drobná, Z; Docolomansky, P; Barancik, M                                                                                                       |
| 128 | Computational models for identifying potential P-glycoprotein substrates and inhibitors                                                                                   | Molecular pharmaceutics, 2006; 3 (1); 33-44                                              | Crivori, P; Reinach, B; Pezzetta, D; Poggesi, I                                                                                                          |
| 129 | P-glycoprotein functions and substrates: possible roles of MDR1 gene in the kidney                                                                                        | Kidney international. Supplement, 1998; 65 (); S11-7                                     | Ernest, S; Bello-Reuss, E                                                                                                                                |
| 130 | P-glycoprotein limits the brain penetration of nonsedating but not sedating H1-antagonists                                                                                | Drug metabolism and disposition: the biological fate of chemicals, 2003; 31 (3); 312-8   | Chen, C; Hanson, E; Watson, JW; Lee, JS                                                                                                                  |

|     |                                                                                                                                                                     |                                                                                                                                            |                                                                                            |
|-----|---------------------------------------------------------------------------------------------------------------------------------------------------------------------|--------------------------------------------------------------------------------------------------------------------------------------------|--------------------------------------------------------------------------------------------|
| 131 | P-glycoprotein does not reduce substrate concentration from the extracellular leaflet of the plasma membrane in living cells                                        | Cancer research, 2001; 61 (21); 7763-9                                                                                                     | Chen, Y; Pant, AC; Simon, SM                                                               |
| 132 | Penetration of amitriptyline, but not of fluoxetine, into brain is enhanced in mice with blood-brain barrier deficiency due to mdr1a P-glycoprotein gene disruption | Neuropsychopharmacology : official publication of the American College of Neuropsychopharmacology, 2000; 22 (4); 380-7                     | Uhr, M; Steckler, T; Yassouridis, A; Holsboer, F                                           |
| 133 | Opiate-induced analgesia is increased and prolonged in mice lacking P-glycoprotein                                                                                  | Anesthesiology, 2000; 92 (5); 1392-9                                                                                                       | Thompson, SJ; Koszdin, K; Bernards, CM                                                     |
| 134 | Characterization of the efflux transporter(s) responsible for restricting intestinal mucosa permeation of the coumarinic acid-based cyclic prodrug of the opioid    | Pharmaceutical research, 2002; 19 (6); 787-93                                                                                              | Tang, F; Borchardt, RT                                                                     |
| 135 | The P-glycoprotein efflux pump: how does it transport drugs?                                                                                                        | The Journal of membrane biology, 1997; 160 (3); 161-75                                                                                     | Sharom, FJ                                                                                 |
| 136 | Differential modulation of P-glycoprotein expression and activity by non-nucleoside HIV-1 reverse transcriptase inhibitors in cell culture                          | Pharmaceutical research, 2002; 19 (7); 1038-45                                                                                             | Störmer, E; von Moltke, LL; Perloff, MD; Greenblatt, DJ                                    |
| 137 | Structure-activity relationship of P-glycoprotein substrates and modifiers                                                                                          | European journal of pharmaceutical sciences : official journal of the European Federation for Pharmaceutical Sciences, 2000; 12 (1); 31-40 | Seelig, A; Landwojtowicz, E                                                                |
| 138 | P-glycoprotein in the blood-brain barrier of mice influences the brain penetration and pharmacological activity of many drugs                                       | The Journal of clinical investigation, 1996; 97 (11); 2517-24                                                                              | Schinkel, AH; Wagenaar, E; Mol, CA; van Deemter, L                                         |
| 139 | Absence of the mdr1a P-Glycoprotein in mice affects tissue distribution and pharmacokinetics of dexamethasone, digoxin, and cyclosporin A                           | The Journal of clinical investigation, 1995; 96 (4); 1698-705                                                                              | Schinkel, AH; Wagenaar, E; van Deemter, L; Mol, CA; Borst, P                               |
| 140 | A general pattern for substrate recognition by P-glycoprotein                                                                                                       | European journal of biochemistry / FEBS, 1998; 251 (1-2); 252-61                                                                           | Seelig, A                                                                                  |
| 141 | Structure-activity relationship studies of propafenone analogs based on P-glycoprotein ATPase activity measurements                                                 | Biochemical pharmacology, 1999; 58 (9); 1447-56                                                                                            | Schmid, D; Ecker, G; Kopp, S; Hitzler, M; Chiba, P                                         |
| 142 | Human P-glycoprotein transports cyclosporin A and FK506                                                                                                             | The Journal of biological chemistry, 1993; 268 (9); 6077-80                                                                                | Saeki, T; Ueda, K; Tanigawara, Y; Hori, R; Komano, T                                       |
| 143 | P-glycoprotein-mediated transcellular transport of MDR-reversing agents                                                                                             | FEBS letters, 1993; 324 (1); 99-102                                                                                                        | Saeki, T; Ueda, K; Tanigawara, Y; Hori, R; Komano, T                                       |
| 144 | From MDR to MXR: new understanding of multidrug resistance systems, their properties and clinical                                                                   | Cellular and molecular life sciences : CMLS, 2001; 58 (7); 931-59                                                                          | Litman, T; Druley, TE; Stein, WD; Bates, SE                                                |
| 145 | Clinical manual of drug interaction principles for medical practice                                                                                                 | 2008; (); 608                                                                                                                              | Wynn, H.; Oesterheld, R.; Cozza, L.; Armstrong, C                                          |
| 146 | Structure-activity relationships of P-glycoprotein interacting drugs: kinetic characterization of their effects on ATPase activity                                  | Biochimica et biophysica acta, 1997; 1361 (2); 159-68                                                                                      | Litman, T; Zeuthen, T; Skovsgaard, T; Stein, WD                                            |
| 147 | Rational use of in vitro P-glycoprotein assays in drug discovery                                                                                                    | The Journal of pharmacology and experimental therapeutics, 2001; 299 (2); 620-8                                                            | Polli, JW; Wring, SA; Humphreys, JE; Huang, L; Morgan, JB; Webster, LO; Serabjit-Singh, CS |
| 148 | Communication between multiple drug binding sites on P-glycoprotein                                                                                                 | Molecular pharmacology, 2000; 58 (3); 624-32                                                                                               | Martin, C; Berridge, G; Higgins, CF; Mistry, P; Charlton, P; Callaghan, R                  |



|     |                                                                                                                                                           |                                                                                                                     |                                                                                                                            |
|-----|-----------------------------------------------------------------------------------------------------------------------------------------------------------|---------------------------------------------------------------------------------------------------------------------|----------------------------------------------------------------------------------------------------------------------------|
| 149 | Mechanisms of transport and structure-permeability relationship of sulfasalazine and its analogs in Caco-2 cell monolayers                                | Pharmaceutical research, 2000; 17 (10); 1168-74                                                                     | Liang, E; Proudfoot, J; Yazdanian, M                                                                                       |
| 150 | Secretory transport of ranitidine and famotidine across Caco-2 cell monolayers                                                                            | The Journal of pharmacology and experimental therapeutics, 2002; 303 (2); 574-80                                    | Lee, K; Ng, C; Brouwer, KL; Thakker, DR                                                                                    |
| 151 | The drug transporter P-glycoprotein limits oral absorption and brain entry of HIV-1 protease inhibitors                                                   | The Journal of clinical investigation, 1998; 101 (2); 289-94                                                        | Kim, RB; Fromm, MF; Wandel, C; Leake, B; Wood, AJ; Roden, DM; Wilkinson, GR                                                |
| 152 | Selectivity of the multidrug resistance modulator, LY335979, for P-glycoprotein and effect on cytochrome P-450 activities                                 | The Journal of pharmacology and experimental therapeutics, 1999; 290 (2); 854-62                                    | Dantzig, AH; Shepard, RL; Law, KL; Tabas, L; Pratt, S; Gillespie, JS; Binkley, SN; Kuhfeld, MT; Starling, JJ; Wrighton, SA |
| 153 | Effect of mdr1a P-glycoprotein gene disruption, gender, and substrate concentration on brain uptake of selected compounds                                 | Pharmaceutical research, 2001; 18 (7); 957-63                                                                       | Dagenais, C; Zong, J; Ducharme, J; Pollack, GM                                                                             |
| 154 | Screening of multidrug-resistance sensitive drugs by in situ brain perfusion in P-glycoprotein-deficient mice                                             | Pharmaceutical research, 2001; 18 (2); 183-90                                                                       | Cisternino, S; Rousselle, C; Dagenais, C; Scherrmann, JM                                                                   |
| 155 | Structure-activity relationship studies on benzofuran analogs of propafenone-type modulators of tumor cell multidrug resistance                           | Journal of Medicinal Chemistry, 1996; 39 (24); 4767-74                                                              | Ecker, G; Chiba, P; Hitzler, M; Schmid, D; Visser, K; Cordes, HP; Csöllei, J; Seydel, JK; Schaper, KJ                      |
| 156 | Interaction of tamoxifen with the multidrug resistance P-glycoprotein                                                                                     | British journal of cancer, 1995; 71 (2); 294-9                                                                      | Callaghan, R; Higgins, CF                                                                                                  |
| 157 | Competition of hydrophobic peptides, cytotoxic drugs, and chemosensitizers on a common P-glycoprotein pharmacophore as revealed by its ATPase activity    | The Journal of biological chemistry, 1996; 271 (6); 3163-71                                                         | Borgnia, MJ; Eytan, GD; Assaraf, YG                                                                                        |
| 158 | Retroviral transfer of the human MDR1 gene confers resistance to bisantrene-specific hematotoxicity                                                       | Clinical cancer research : an official journal of the American Association for Cancer Research, 1996; 2 (6); 973-80 | Aksentijevich, I; Cardarelli, CO; Pastan, I; Gottesman, MM                                                                 |
| 159 | Characterization of multidrug resistance by fluorescent dyes                                                                                              | Cancer research, 1991; 51 (17); 4665-70                                                                             | Kessel, D; Beck, WT; Kukuruga, D; Schulz, V                                                                                |
| 160 | Transport of celiprolol across human intestinal epithelial (Caco-2) cells: mediation of secretion by multiple transporters including P-glycoprotein       | British journal of pharmacology, 1993; 110 (3); 1009-16                                                             | Karlsson, J; Kuo, SM; Ziemniak, J; Artursson, P                                                                            |
| 161 | Role of blood-brain barrier P-glycoprotein in limiting brain accumulation and sedative side-effects of asimadoline, a peripherally acting analgaesic drug | British journal of pharmacology, 1999; 127 (1); 43-50                                                               | Jonker, JW; Wagenaar, E; van Deemter, L; Gottschlich, R; Bender, HM; Dasenbrock, J; Schinkel, AH                           |
| 162 | Antitumor activity of troxacitabine (Troxatyl) against anthracycline-resistant human xenografts                                                           | Cancer chemotherapy and pharmacology, 2002; 50 (6); 490-6                                                           | Gourdeau, H; Genne, P; Kadhim, S; Bibeau, L; Duchamp, O; Ouellet, F; deMuys, JM; Bouffard, DY; Attardo, G                  |
| 163 | A computational ensemble pharmacophore model for identifying substrates of P-glycoprotein ATP-dependent primary active transport of cysteinyl             | Journal of Medicinal Chemistry, 2002; 45 (9); 1737-40                                                               | Penzotti, JE; Lamb, ML; Evensen, E; Grootenhuis, PD                                                                        |
| 164 | leukotrienes across liver canalicular membrane. Role of the ATP-dependent transport system for glutathione S-conjugates                                   | The Journal of biological chemistry, 1990; 265 (31); 19279-86                                                       | Ishikawa, T; Müller, M; Klünemann, C; Schaub, T; Keppler, D                                                                |
| 165 | Distribution of STI-571 to the brain is limited by P-glycoprotein-mediated efflux                                                                         | The Journal of pharmacology and experimental therapeutics, 2003; 304 (3); 1085-92                                   | Dai, H; Marbach, P; Lemaire, M; Hayes, M; Elmquist, WF                                                                     |
| 166 | OATP and P-glycoprotein transporters mediate the cellular uptake and excretion of fexofenadine                                                            | Drug metabolism and disposition: the biological fate of chemicals, 1999; 27 (8); 866-71                             | Cvetkovic, M; Leake, B; Fromm, MF; Wilkinson, GR; Kim, RB                                                                  |

|     |                                                                                                                                                           |                                                                                        |                                                                                                                                                                                                |
|-----|-----------------------------------------------------------------------------------------------------------------------------------------------------------|----------------------------------------------------------------------------------------|------------------------------------------------------------------------------------------------------------------------------------------------------------------------------------------------|
| 167 | Unmasking the dynamic interplay between intestinal P-glycoprotein and CYP3A4                                                                              | The Journal of pharmacology and experimental therapeutics, 2002; 300 (3); 1036-45      | Cummins, CL; Jacobsen, W; Benet, LZ                                                                                                                                                            |
| 168 | P-glycoprotein limits the brain penetration of nonsedating but not sedating H1-antagonists                                                                | Drug metabolism and disposition: the biological fate of chemicals, 2003; 31 (3); 312-8 | Chen, C; Hanson, E; Watson, JW; Lee, JS                                                                                                                                                        |
| 169 | Biochemical, cellular, and pharmacological aspects of the multidrug transporter                                                                           | Annual review of pharmacology and toxicology, 1999; 39 (); 361-98                      | Ambudkar, SV; Dey, S; Hrycyna, CA; Ramachandra, M; Pastan, I; Gottesman, MM                                                                                                                    |
| 170 | Passive permeability and P-glycoprotein-mediated efflux differentiate central nervous system (CNS) and non-CNS marketed drugs                             | The Journal of pharmacology and experimental therapeutics, 2002; 303 (3); 1029-37      | Mahar Doan, KM; Humphreys, JE; Webster, LO; Wring, SA; Shampine, LJ; Serabjit-Singh, CJ; Adkison, KK; Polli, JW                                                                                |
| 171 | Combinatorial QSAR modeling of P-glycoprotein substrates                                                                                                  | Journal of chemical information and modeling, 2006; 46 (3); 1245-54                    | de Cerqueira Lima, P; Golbraikh, A; Oloff, S; Xiao, Y; Tropsha, A                                                                                                                              |
| 172 | Human Intestinal Transporter Database: QSAR Modeling and Virtual Profiling of Drug Uptake, Efflux and Interactions                                        | Pharm Res (2013) 30:996-1007                                                           | Alexander Sedykh, Denis Fourches, Jianmin Duan                                                                                                                                                 |
| 173 | Annotating Human P-Glycoprotein Bioassay Data                                                                                                             | Molecular informatics, 2012, 31, 599-609                                               | Barbara Zdrazil, Marta Pinto, Poongavanam Vasanthanathan, Antony J. Williams, Linda Zander Balderud, Ola Engkvist, Christine Chichester, Anne Hersey, John P. Overington, and Gerhard F. Ecker |
| 174 | A Novel Approach for Predicting P-glycoprotein (ABCB1) Inhibition Using Molecular Interaction Fields                                                      | Journal of medicinal chemistry, 2011; 54(6): 1740–1751. doi:10.1021/jm101421d          | Fabio Broccatellia, Emanuele Carosata, Annalisa Nerib, Maria Frosinib, Laura Goraccic, Tudor I. Opread, and Gabriele Cruciania                                                                 |
| 175 | ADME Evaluation in Drug Discovery. 10. Predictions of P-Glycoprotein Inhibitors Using Recursive Partitioning and Naive Bayesian Classification Techniques | Molecular pharmaceutics, 2011, 8, 889–900                                              | Lei Chen, Youyong Li, Qing Zhao, Hui Peng, and Tingjun Hou                                                                                                                                     |

---



|                                            |     |                                                                                               |    |                                                                                                                                                                                                                                                                                                                                                                                                                                                         |
|--------------------------------------------|-----|-----------------------------------------------------------------------------------------------|----|---------------------------------------------------------------------------------------------------------------------------------------------------------------------------------------------------------------------------------------------------------------------------------------------------------------------------------------------------------------------------------------------------------------------------------------------------------|
| Constitutional Crippen logP and MR         | 12  | Sv, Sse, Spe, Sare, Sp, Si, Mv, Mse, Mpe, Mare, Mp, Mi                                        | 2D |                                                                                                                                                                                                                                                                                                                                                                                                                                                         |
| Detour matrix Eccentric connectivity index | 2   | CrippenLogP, CrippenMR                                                                        | 2D | Wildman, S. A., and Crippen, G. M. (1999). Prediction of Physicochemical Parameters by Atomic Contributions. <i>J Chem Inf Comput Sci</i> 39, 868-873.                                                                                                                                                                                                                                                                                                  |
| Atom type electrotopological state         | 11  | SpMax_Dt, SpDiam_Dt, SpAD_Dt, SpMAD_Dt, EE_Dt, VE1_Dt, VE2_Dt, VE3_Dt, VR1_Dt, VR2_Dt, VR3_Dt | 2D | Todeschini, R. and Consonni, V. (2009). <i>Molecular descriptors for chemoinformatics</i> , (Weinheim: Wiley VCH) pg 714-726                                                                                                                                                                                                                                                                                                                            |
|                                            | 1   | ECCEN                                                                                         | 2D | Sharma, V. and Goswami, R. and Madan, A.K. , Eccentric Connectivity Index: A Novel Highly Discriminating Topological Descriptor for Structure-Property and Structure-Activity Studies , <i>Journal of Chemical Information and Computer Sciences</i> , 1997, 37:273-282                                                                                                                                                                                 |
|                                            | 489 |                                                                                               | 2D | Hall, L. H., and Kier, L. B. (1995). Electrotological state indices for atom types: A novel combination of electronic, topological, and valence state information. <i>J Chem Inf Comput Sci</i> 35, 1039-1045; Liu, R., Sun, H., and So, S. S. (2001). Development of quantitative structure-property relationship models for early ADME evaluation in drug discovery. 2. Blood-brain barrier penetration. <i>J Chem Inf Comput Sci</i> 41, 1623-1632.; |
|                                            |     |                                                                                               |    | Gramatica, P., Corradi, M., and Consonni, V. (2000). Modelling and prediction of soil sorption coefficients                                                                                                                                                                                                                                                                                                                                             |
| Extended topochemical atom                 | 43  |                                                                                               | 2D | Roy K & Ghosh, On QSAR and Toxicity by Topochemical Atoms, <i>Chem. Pharm. Bull.</i> , 51, 763-775, instituted Benzenes. <i>J. Chem. Inf. Comput. Sci.</i> , 44, 2004, 559-567. <a href="http://dx.doi.org/10.1021/ci0342066">http://dx.doi.org/10.1021/ci0342066</a> ;                                                                                                                                                                                 |
| FMFDescriptor                              | 1   | FMF                                                                                           | 2D | Roy K, Das R N, On some novel extended topochemical atom (ETA) parameters for effective encoding of chemical information and modeling of fundamental physicochemical properties. <i>SAR QSAR Environ Res</i> 22, 2011, 451-472, <a href="http://dx.doi.org/10.1080/1062936X.2011.569900">http://dx.doi.org/10.1080/1062936X.2011.569900</a>                                                                                                             |
| Fragment complexity                        | 1   | fragC                                                                                         | 2D | Yang, Y. and Chen, H. and Nilsson, I. and Muresan, S. and Engkvist, O., Investigation of the Relationship between Topology and Selectivity for Druglike Molecules, <i>J. Med. Chem.</i> , 2010, 53: 7709-7714                                                                                                                                                                                                                                           |
| Hbond acceptor count                       | 4   | nHBAcc, nHBAcc2, nHBAcc3, nHBAcc_Lipinski                                                     | 2D | Nilakantan, R. and Nunn, D.S. and Greenblatt, L. and Walker, G. and Haraki, K. and Mobilio, D., A family of ring system-based structural fragments for use in structure-activity studies: database mining and recursive partitioning., <i>Journal of chemical information and modeling</i> , 2006, 46:1069-1077                                                                                                                                         |
| Hbond donor count                          | 2   | nHBDon, nHBDon_Lipinski                                                                       | 2D |                                                                                                                                                                                                                                                                                                                                                                                                                                                         |
| Hybridization ratio                        | 1   | HybRatio                                                                                      | 2D |                                                                                                                                                                                                                                                                                                                                                                                                                                                         |
| Information content                        | 42  |                                                                                               | 2D | Todeschini, R. and Consonni, V. (2009). <i>Molecular descriptors for chemoinformatics</i> , (Weinheim: Wiley VCH) pg 408-411.                                                                                                                                                                                                                                                                                                                           |
| Kappa shape indices                        | 3   | Kier1, Kier2, Kier3                                                                           | 2D | Hall, L. H., and Kier, L. B. (1991). The molecular connectivity chi indices and kappa shape indices in structure-property modeling. In <i>Reviews of Computational Chemistry</i> , K.B. Lipkowitz, and D.B. Boyd, eds. (New York: VCH publishers), pp. 367-412.                                                                                                                                                                                         |
| Largest chain                              | 1   | nAtomLC                                                                                       | 2D |                                                                                                                                                                                                                                                                                                                                                                                                                                                         |
| Largest Pi system                          | 1   | nAtomP                                                                                        | 2D |                                                                                                                                                                                                                                                                                                                                                                                                                                                         |
| Longest aliphatic chain                    | 1   | nAtomLAC                                                                                      | 2D |                                                                                                                                                                                                                                                                                                                                                                                                                                                         |

|                                            |    |                                                                                    |    |                                                                                                                                                                                                                                                                                                                                                                       |
|--------------------------------------------|----|------------------------------------------------------------------------------------|----|-----------------------------------------------------------------------------------------------------------------------------------------------------------------------------------------------------------------------------------------------------------------------------------------------------------------------------------------------------------------------|
| Mannhold LogP                              | 1  | MLogP                                                                              | 2D | Mannhold, R. and Poda, G.I. and Ostermann, C. and Tetko, I.V., Calculation of molecular lipophilicity: State-of-the-art and comparison of log P methods on more than 96,000 compounds, J.Pharm.Sci., 2009, Abraham MH, McGowan JC. The use of characteristic volumes to measure cavity terms in reversed phase liquid chromatography. Chromatographia. 1987;23:243-6. |
| McGowan volume                             | 1  | McGowan_Volume                                                                     | 2D |                                                                                                                                                                                                                                                                                                                                                                       |
| Molecular distance                         | 19 |                                                                                    | 2D | Liu, S. and Cao, C. and Li, Z., Approach to Estimation and Prediction for Normal Boiling Point (NBP) of Alkanes Based on a Novel Molecular Distance Edge (MDE) Vector, lambda, Journal of Chemical Information and Computer Sciences, 1998, 38:387-394                                                                                                                |
| edge Molecular linear free energy relation | 6  | MLFER_A, MLFER_BH, MLFER_BO, MLFER_S, MLFER_E, MLFER_L                             | 2D | Platts JA, Butina D, Abraham MH, Hersey A. Estimation of molecular free energy relation descriptors using a group contribution approach. J Chem Inf Comput Sci. 1999;39(5):835-45.                                                                                                                                                                                    |
| Path counts                                | 22 |                                                                                    | 2D | Todeschini, R. and Consonni, V. (2009). Molecular descriptors for chemoinformatics, (Weinheim: Wiley VCH) pg 574-579, pg 395-402                                                                                                                                                                                                                                      |
| Petitjean number                           | 1  | PetitjeanNumber                                                                    | 2D |                                                                                                                                                                                                                                                                                                                                                                       |
| Ring count                                 | 68 |                                                                                    | 2D |                                                                                                                                                                                                                                                                                                                                                                       |
| Rotatable bonds                            | 4  | nRotB, RotBFrac, nRotBt, RotBtFrac                                                 | 2D |                                                                                                                                                                                                                                                                                                                                                                       |
| Rule of five                               | 1  | LipinskiFailures                                                                   | 2D |                                                                                                                                                                                                                                                                                                                                                                       |
| Topological                                | 3  | topoRadius, topoDiameter, topoShape                                                | 2D |                                                                                                                                                                                                                                                                                                                                                                       |
| Topological charge                         | 21 |                                                                                    | 2D | Todeschini, R. and Consonni, V. (2009). Molecular descriptors for chemoinformatics, (Weinheim: Wiley VCH) pg 809-812                                                                                                                                                                                                                                                  |
| Topological distance matrix                | 11 | SpMax_D, SpDiam_D, SpAD_D, SpMAD_D, EE_D, VE1_D, VE2_D, VE3_D, VR1_D, VR2_D, VR3_D | 2D | Todeschini, R. and Consonni, V. (2009). Molecular descriptors for chemoinformatics, (Weinheim: Wiley VCH) pg 714-726                                                                                                                                                                                                                                                  |
| Topological polar surface area             | 1  | TopoPSA                                                                            | 2D | Ertl, P. and Rohde, B. and Selzer, P., Fast Calculation of Molecular Polar Surface Area as a Sum of Fragment-Based Contributions and Its Application to the Prediction of Drug Transport Properties, J. Med. Chem., 2000, 43:3714-3717                                                                                                                                |
| Van der Waals volume                       | 1  | VABC                                                                               | 2D |                                                                                                                                                                                                                                                                                                                                                                       |
| Vertex adjacency information (magnitude)   | 1  | vAdjMat                                                                            | 2D |                                                                                                                                                                                                                                                                                                                                                                       |
| Walk counts                                | 20 |                                                                                    | 2D | Todeschini, R. and Consonni, V. (2009). Molecular descriptors for chemoinformatics, (Weinheim: Wiley VCH) pg 875-882, pg 678-681                                                                                                                                                                                                                                      |
| Weight                                     | 2  | MW, AMW                                                                            | 2D |                                                                                                                                                                                                                                                                                                                                                                       |
| Weighted path                              | 5  | WTPT-1, WTPT-2, WTPT-3, WTPT-4, WTPT-5                                             | 2D | Randic, M., On molecular identification numbers, Journal of Chemical Information and Computer Science, 1984, 24:164-175                                                                                                                                                                                                                                               |
| Wiener numbers                             | 2  | WPATH, WPOL                                                                        | 2D | Wiener, Harry, Structural Determination of Paraffin Boiling Points, Journal of the American Chemical Society, 1947, 69:17-20                                                                                                                                                                                                                                          |
| XLogP                                      | 1  | XLogP                                                                              | 2D | Wang, R., Fu, Y., and Lai, L., A New Atom-Additive Method for Calculating Partition Coefficients, Journal of Chemical Information and Computer Sciences, 1997, 37:615-621;<br>Wang, R., Gao, Y., and Lai, L., Calculating partition coefficient by atom-additive method, Perspectives in Drug Discovery and Design, 2000, 19:47-66                                    |

|                          |      |                                                                                      |             |                                                                                                                                                                                          |
|--------------------------|------|--------------------------------------------------------------------------------------|-------------|------------------------------------------------------------------------------------------------------------------------------------------------------------------------------------------|
| Zagreb index             | 1    | Zagreb                                                                               | 2D          |                                                                                                                                                                                          |
| Drug-likeness descriptor | 9    | Drug-likenessdescriptor                                                              | 2D          | Bickerton, G. R.; Paolini, G. V.; Besnard, J.; Muresan, S.; Hopkins, A. L., Quantifying the chemical beauty of drugs. Nat Chem 2012, 4 (2), 90-8.                                        |
| Estate fingerprint       | 79   | E-State fragments                                                                    | Fingerprint | Hall LH, Kier LB. Electrotopological state indices for atom types: A novel combination of electronic, topological, and valence state information. J Chem Inf Comput Sci, 1995;35:1039-45 |
| MACCS fingerprint        | 166  | MACCS keys                                                                           | Fingerprint |                                                                                                                                                                                          |
| Pubchem fingerprint      | 881  | Pubchem fingerprint                                                                  | Fingerprint | <a href="ftp://ftp.ncbi.nlm.nih.gov/pubchem/specifications/pubchem_fingerprints.txt">ftp://ftp.ncbi.nlm.nih.gov/pubchem/specifications/pubchem_fingerprints.txt</a>                      |
| Substructure             | 307  | Presence of SMARTS Patterns for Functional Group Classification by Christian Laggner | Fingerprint | Openbabel's SMARTS_InteLigand.txt                                                                                                                                                        |
| Klekota-Roth fingerprint | 4860 | Presence of chemical substructures                                                   | Fingerprint | Klekota J, Roth FP. Chemical substructures that enrich for biological activity. Bioinformatics, 2008;24(21):2518-25                                                                      |
| 2D atom pairs            | 780  | Presence of atom pairs at various topological distances                              | Fingerprint |                                                                                                                                                                                          |

---

Table S3. Analysis of variance table of the regression model

| Term                 | Df | Sum Sq   | Mean Sq  | F value  | Pr(>F)   |
|----------------------|----|----------|----------|----------|----------|
| CI                   | 1  | 0.035491 | 0.035491 | 713.4991 | 5.56E-28 |
| Diversity of Feature | 1  | 0.001916 | 0.001916 | 38.51691 | 2.01E-07 |
| Diversity of Sample  | 1  | 0.006577 | 0.006577 | 132.2188 | 1.48E-14 |
| Data Set             | 4  | 0.034539 | 0.008635 | 173.5911 | 1.58E-25 |
| Residuals            | 42 | 0.002089 | 4.97E-05 |          |          |

Table S4. The adjusted  $P$ -values of pairwise contrasts for different ensemble based methods

| Data set | Subset | Model        | Bagging based | Boosting based | AECF   |
|----------|--------|--------------|---------------|----------------|--------|
| CacoP    | TES    | SVM-Bagging  | 1             | 0.7442         | 0.0002 |
|          |        | SVM-Boosting | 0.7442        | 1              | 0.0002 |
|          |        | AECF         | 0.0005        | 0.0005         | 1      |
|          | VAS    | SVM-Bagging  | 1             | 0.8948         | 0.0002 |
|          |        | SVM-Boosting | 0.8948        | 1              | 0.0002 |
|          |        | AECF         | 0.0005        | 0.0005         | 1      |
| HIA      | TES    | RF-Bagging   | 1             | 0.0233         | 0.0002 |
|          |        | RF-Boosting  | 0.0233        | 1              | 0.0002 |
|          |        | AECF         | 0.0004        | 0.0005         | 1      |
|          | VAS    | RF-Bagging   | 1             | 0.123          | 0.0002 |
|          |        | RF-Boosting  | 0.123         | 1              | 0.0002 |
|          |        | AECF         | 0.0005        | 0.0005         | 1      |
| OB       | TES    | SVM-Bagging  | 1             | 0.0098         | 0.0002 |
|          |        | SVM-Boosting | 0.0098        | 1              | 0.0002 |
|          |        | AECF         | 0.0005        | 0.0005         | 1      |
|          | VAS    | SVM-Bagging  | 1             | 0.0619         | 0.0002 |
|          |        | SVM-Boosting | 0.0619        | 1              | 0.0002 |
|          |        | AECF         | 0.0005        | 0.0005         | 1      |
| PS       | TES    | KNN-Bagging  | 1             | 0.0017         | 0.0002 |
|          |        | KNN-Boosting | 0.0017        | 1              | 0.0002 |
|          |        | AECF         | 0.0005        | 0.0005         | 1      |
|          | VAS    | KNN-Bagging  | 1             | 0.2264         | 0.0002 |
|          |        | KNN-Boosting | 0.2264        | 1              | 0.0002 |
|          |        | AECF         | 0.0005        | 0.0005         | 1      |
| PI       | TES    | SVM-Bagging  | 1             | 1              | 0.0002 |
|          |        | SVM-Boosting | 1             | 1              | 0.0002 |
|          |        | AECF         | 0.0005        | 0.0005         | 1      |
|          | VAS    | SVM-Bagging  | 1             | 0.1231         | 0.0002 |
|          |        | SVM-Boosting | 0.1231        | 1              | 0.0002 |
|          |        | AECF         | 0.0005        | 0.0005         | 1      |



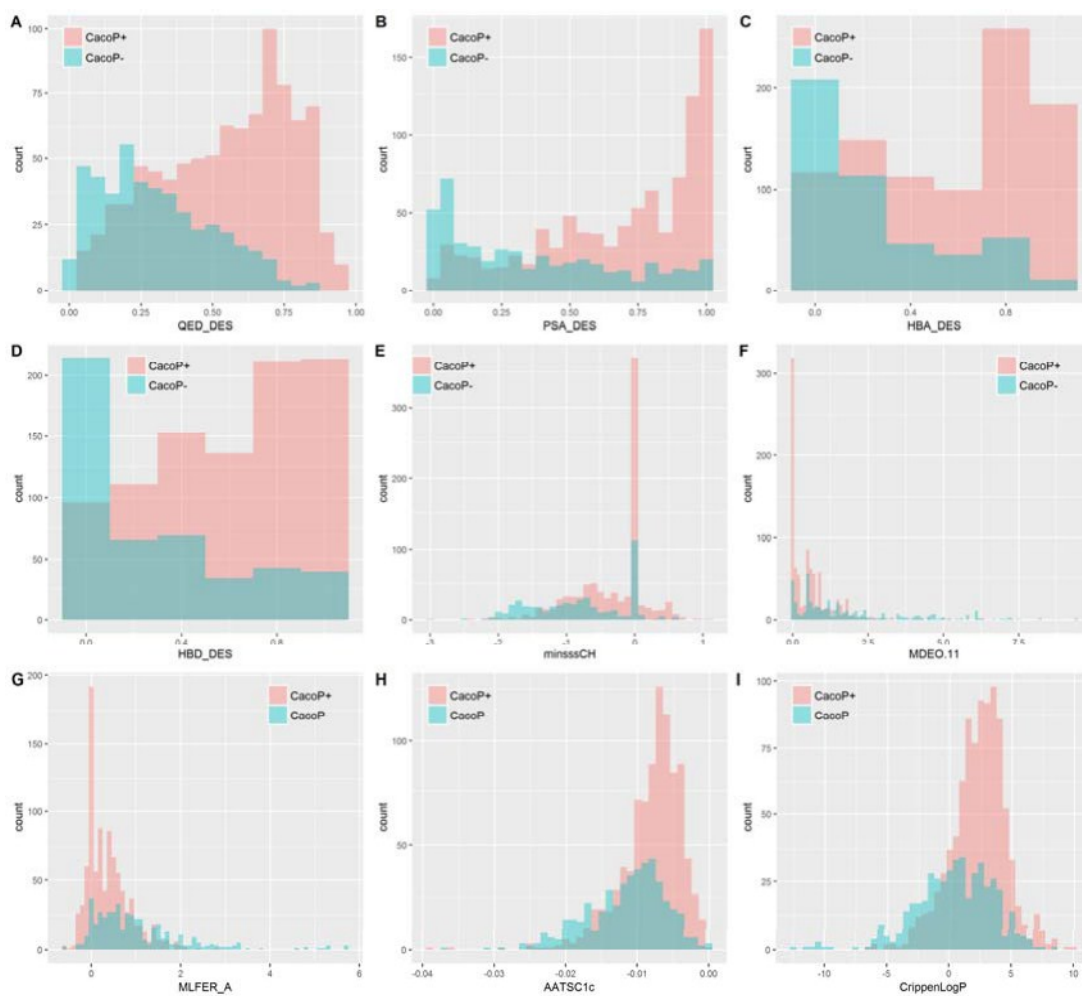

Figure S1 Distributions of top-9 molecular properties for CacoP data

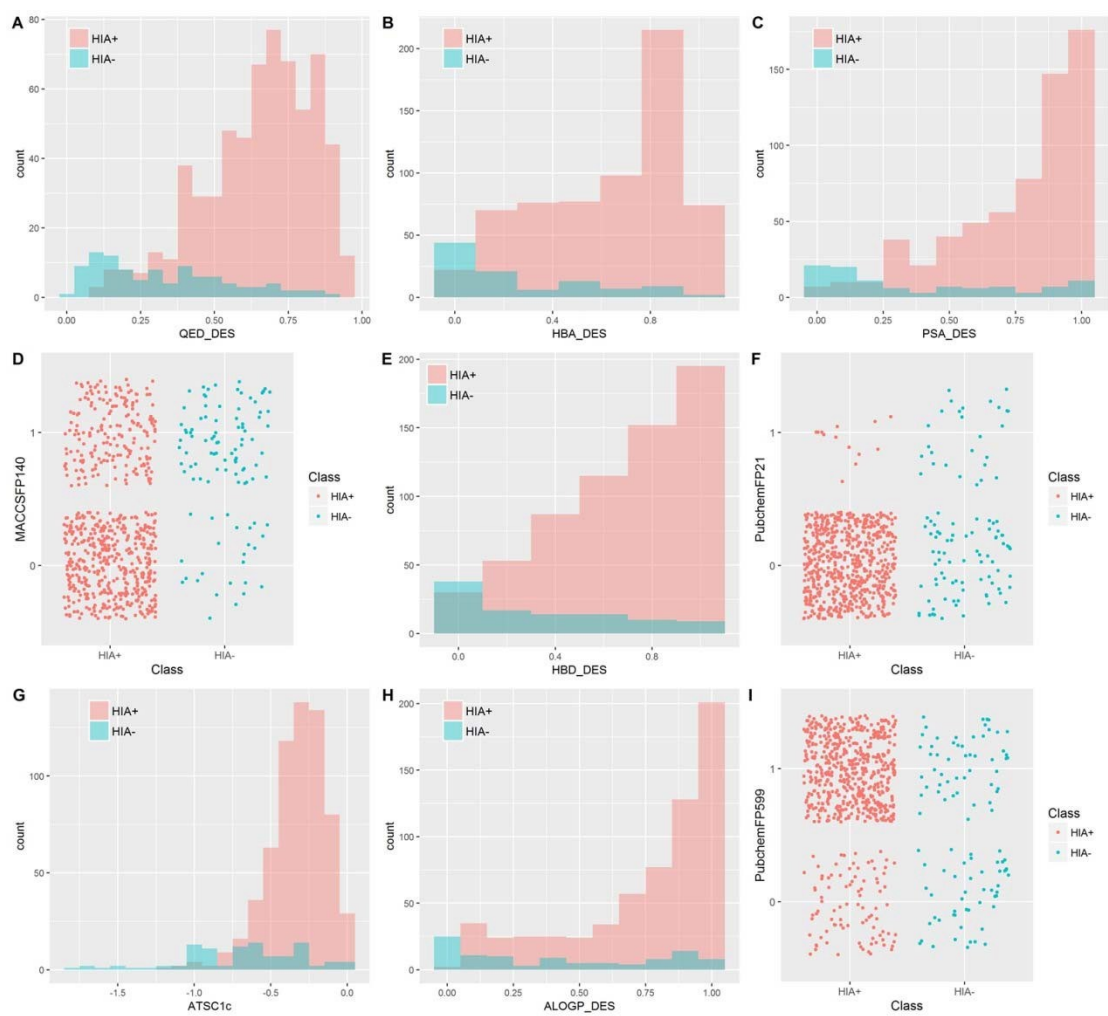

Figure S2 Distributions of top-9 molecular properties for HIA data

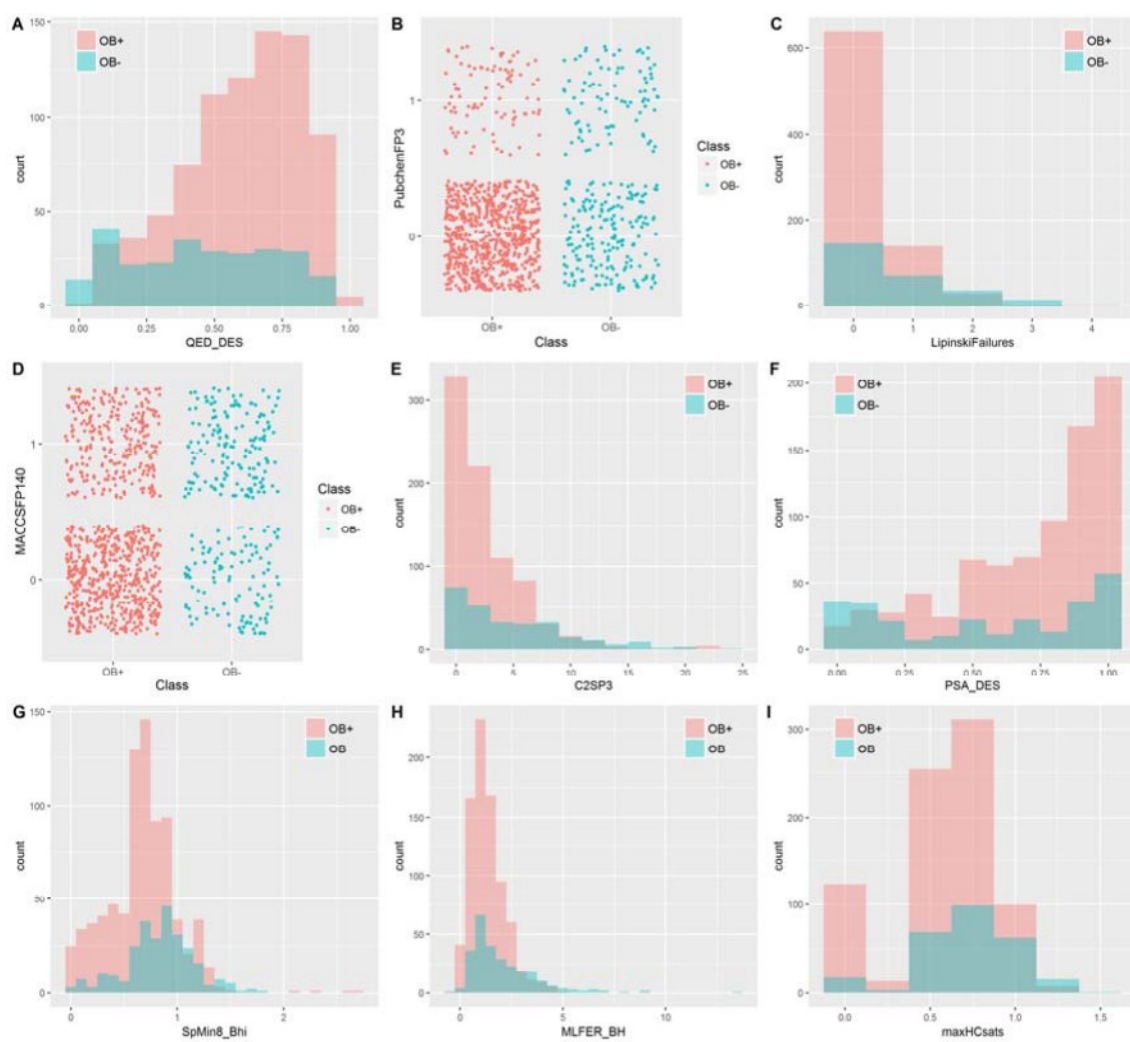

Figure S3 Distributions of top-9 molecular properties for OB data

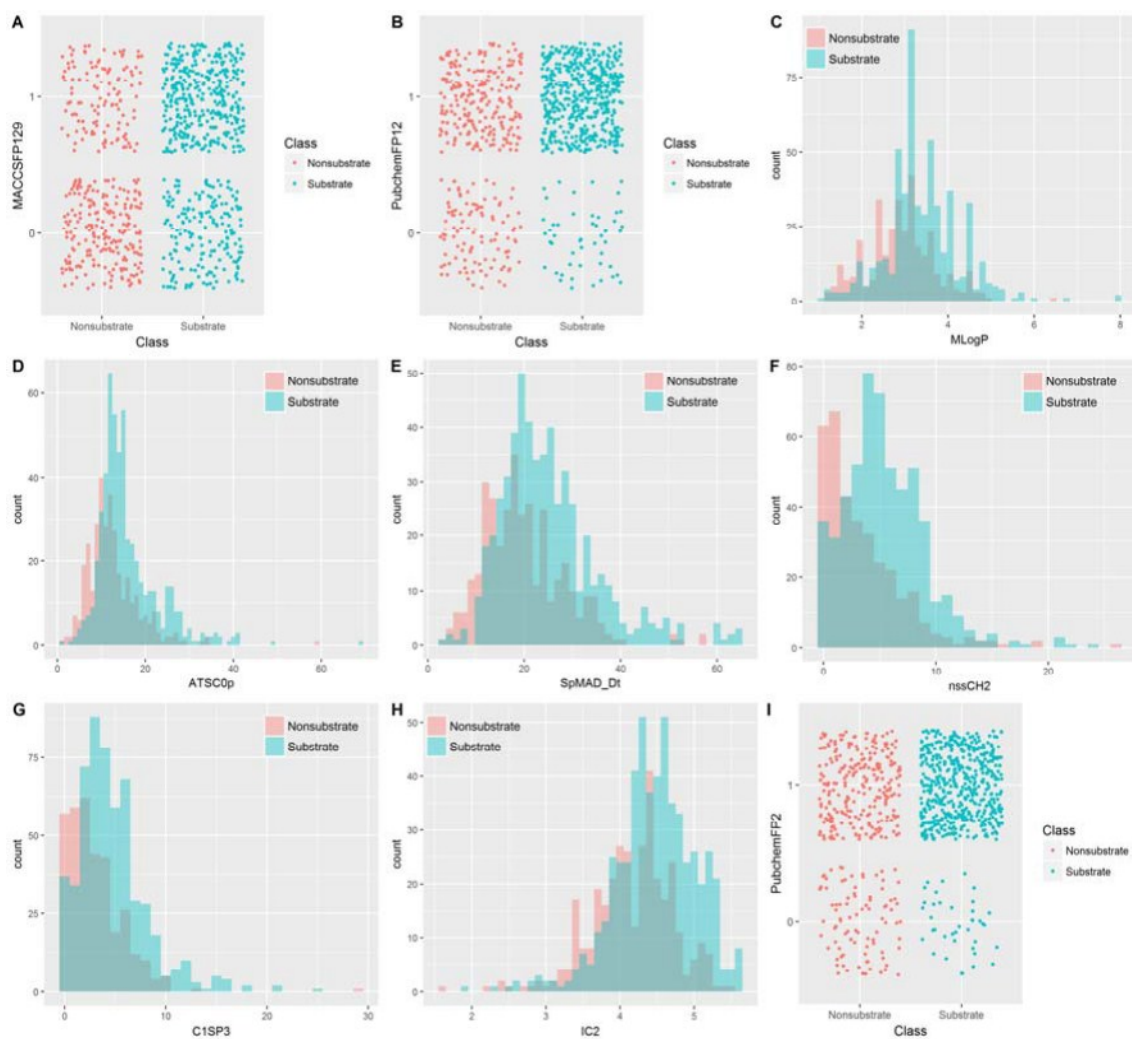

Figure S4 Distributions of top-9 molecular properties for PS data

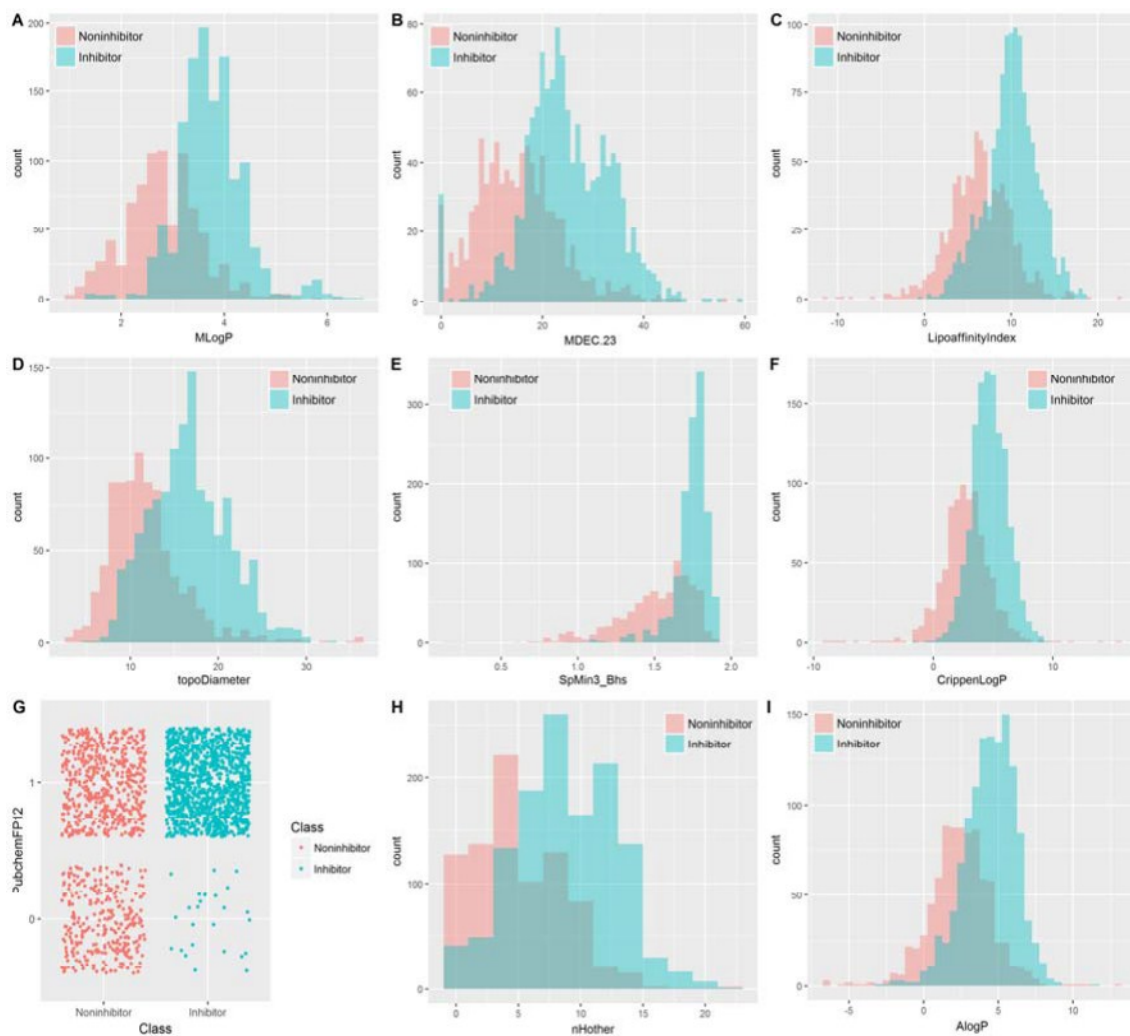

Figure S5 Distributions of top-9 molecular properties for PI data
